# Supplementary material for: The Network of Cancer Genes (NCG): a comprehensive catalogue of known and candidate cancer genes from cancer sequencing screens
Source: PubMed Central journal article supplement (PMC6317252; doi:10.1186/s13059-018-1612-0), 2019-01-03
Supplement: 13059_2018_1612_MOESM1_ESM.pdf [file 13059_2018_1612_MOESM1_ESM.pdf]

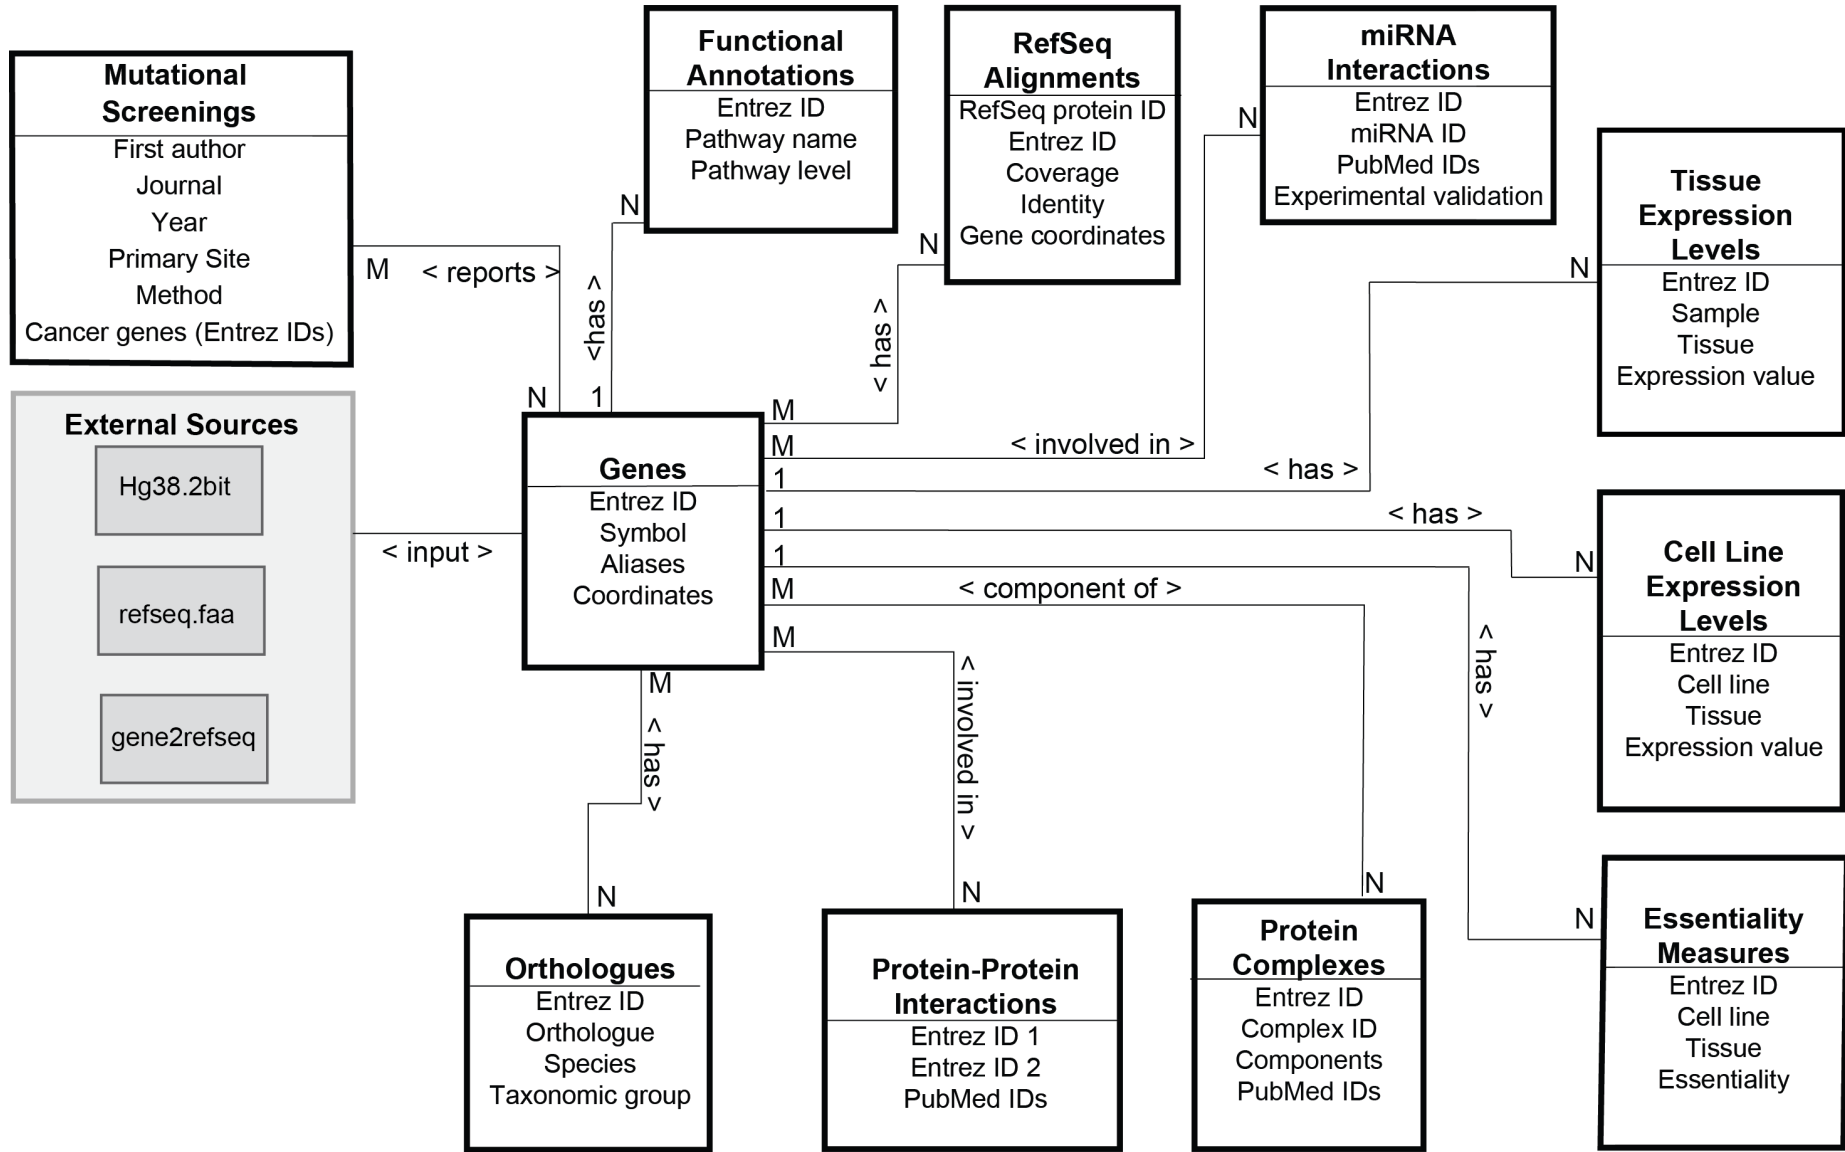

**Additional File 1: Figure S1. Schema of the NCG database**

Entity-relationship diagram indicating one-to-many and many-to-many relationships between genes and other entities in the NCG database. The external source files used to generate the Genes entity are shown in grey.
