# Supplementary material for: The Network of Cancer Genes (NCG): a comprehensive catalogue of known and candidate cancer genes from cancer sequencing screens
Source: Genome Biol. 2019 Jan 3;20:1. doi: 10.1186/s13059-018-1612-0 (PMC6317252; doi:10.1186/s13059-018-1612-0)
Supplement: Supplementary file 3 — Lists of all cancer genes, known cancer genes, and candidate cancer genes. (XLSX 840 kb) [file 13059_2018_1612_MOESM3_ESM.xlsx]

## Sheet: 2372_cancergenes_literature
entrez	symbol	pubmed_id	type	primary_site	cancer_type	method
25	ABL1	29625053	WES	multiple	pan-cancer_adult	PanSoftWare
25	ABL1	14993899	Known Cancer	multiple	-	-
25	ABL1	29489755	WGS-WES-RNAseq	multiple	pan-cancer_paediatric	GRIN, MutSig
25	ABL1	23539594	Known Cancer	multiple	-	-
27	ABL2	14993899	Known Cancer	multiple	-	-
48	ACO1	24390350	WES	multiple	pan-cancer_adult	MutSig
60	ACTB	22343534	WES	blood	diffuse_large_B-cell_lymphoma	MutSig
60	ACTB	29489755	WGS-WES-RNAseq	multiple	pan-cancer_paediatric	GRIN, MutSig
60	ACTB	28988769	WES	bladder	bladder_cancer	MutSig
71	ACTG1	26451490	WES	breast	breast_cancer	MutSig
90	ACVR1	29625053	WES	multiple	pan-cancer_adult	PanSoftWare
90	ACVR1	24705254	WGS-WES	brain	diffuse_intrinsic_pontine_glioma	Recurrence-based
90	ACVR1	24705250	WES	brain	astrocytoma	Recurrence-based
90	ACVR1	14993899	Known Cancer	multiple	-	-
90	ACVR1	29489754	WGS-WES	multiple	pan-cancer_paediatric	MuSiC
90	ACVR1	24705252	WGS-WES	brain	diffuse_intrinsic_pontine_glioma	Recurrence-based
90	ACVR1	24705251	WGS-WES	brain	paediatric_high-grade_glioma	Recurrence-based
91	ACVR1B	26909576	WGS	pancreas	pancreatic_cancer_(all_histologies)	HOTNET2, OncodriveFM, MutSig
91	ACVR1B	29625053	WES	multiple	pan-cancer_adult	PanSoftWare
91	ACVR1B	22810696	WES	colorectal	colorectal_adenocarcinoma	MutSig
91	ACVR1B	26804919	WES	small_intestine	ampullary_adenocarcinoma	MutSig
91	ACVR1B	20668451	Gene panel	breast	breast_cancer	Wood-based
91	ACVR1B	24132290	WES	multiple	pan-cancer_adult	MuSiC
91	ACVR1B	24390350	WES	multiple	pan-cancer_adult	MutSig
91	ACVR1B	23539594	Known Cancer	multiple	-	-
91	ACVR1B	26806338	WES-gene panel	small_intestine	ampullary_adenocarcinoma	Recurrence-based
92	ACVR2A	26909576	WGS	pancreas	pancreatic_cancer_(all_histologies)	HOTNET2, OncodriveFM, MutSig
92	ACVR2A	29625053	WES	multiple	pan-cancer_adult	PanSoftWare
92	ACVR2A	22810696	WES	colorectal	colorectal_adenocarcinoma	MutSig
92	ACVR2A	27064257	WGS	hepatobiliary	pan-liver	Paper-specific
92	ACVR2A	14993899	Known Cancer	multiple	-	-
92	ACVR2A	27149842	WES	colorectal	colorectal_adenocarcinoma	MutSig
92	ACVR2A	24132290	WES	multiple	pan-cancer_adult	MuSiC
92	ACVR2A	25822088	WES	hepatobiliary	hepatocellular_carcinoma	MutSig
92	ACVR2A	28622513	WES	hepatobiliary	hepatocellular_carcinoma	MutSig, Recurrence-based
92	ACVR2A	25362482	WES	hepatobiliary	hepatocellular_carcinoma	MutSig
92	ACVR2A	22037554	WES	stomach	gastric_adenocarcinoma	Wood-based
92	ACVR2A	24816253	WGS	stomach	gastric_adenocarcinoma	Youn-based
92	ACVR2A	26806338	WES-gene panel	small_intestine	ampullary_adenocarcinoma	Recurrence-based
93	ACVR2B	24390350	WES	multiple	pan-cancer_adult	MutSig
102	ADAM10	22343534	WES	blood	diffuse_large_B-cell_lymphoma	MutSig
107	ADCY1	22941189	WES	lung	small_cell_lung_cancer	Wood-based
114	ADCY8	21798893	WES	head_and_neck	squamous_head_and_neck_cancer	MutSig
119	ADD2	27149842	WES	colorectal	colorectal_adenocarcinoma	MutSig
120	ADD3	29489755	WGS-WES-RNAseq	multiple	pan-cancer_paediatric	GRIN, MutSig
125	ADH1B	25362482	WES	hepatobiliary	hepatocellular_carcinoma	MutSig
143	PARP4	26451490	WES	breast	breast_cancer	MutSig
148	ADRA1A	27064257	WGS	hepatobiliary	pan-liver	Paper-specific
173	AFM	24120142	WES	brain	glioblastoma	InVEx, MutSig
176	ACAN	26824661	WGS-WES	brain	pan-glioma	MutSig
182	JAG1	25730765	WGS	blood	acute_lymphocytic_leukemia	Recurrence-based
182	JAG1	26909576	WGS	pancreas	pancreatic_cancer_(all_histologies)	HOTNET2, OncodriveFM, MutSig
182	JAG1	25501392	WES	multiple	pan-cancer_adult	HOTNET2
186	AGTR2	27161491	Gene panel	breast	breast_cancer	Recurrence-based
187	APLNR	20668451	Gene panel	lung	lung_cancer_(all_histologies)	Wood-based
207	AKT1	29625053	WES	multiple	pan-cancer_adult	PanSoftWare
207	AKT1	22722202	WES	breast	breast_cancer	MutSig
207	AKT1	22610119	WES	prostate	prostate_cancer	MutSig
207	AKT1	24633157	WGS-WES-Gene panel	soft_tissue	angiosarcoma	Greenman-based
207	AKT1	23000897	WES	breast	breast_cancer	MuSiC
207	AKT1	26451490	WES	breast	breast_cancer	MutSig
207	AKT1	23348505	WES	brain	meningioma	Recurrence-based
207	AKT1	14993899	Known Cancer	multiple	-	-
207	AKT1	27348297	WES	uterus	endometrial_cancer	MutSig
207	AKT1	20668451	Gene panel	breast	breast_cancer	Wood-based
207	AKT1	24132290	WES	multiple	pan-cancer_adult	MuSiC
207	AKT1	24390350	WES	multiple	pan-cancer_adult	MutSig
207	AKT1	28027327	WES	breast	breast_cancer	MutSig
207	AKT1	29489755	WGS-WES-RNAseq	multiple	pan-cancer_paediatric	GRIN, MutSig
207	AKT1	27135926	WGS	breast	breast_cancer	Paper-specific
207	AKT1	27161491	Gene panel	breast	breast_cancer	Recurrence-based
207	AKT1	26000489	WES	prostate	prostate_cancer	MutSig
207	AKT1	22722201	WES	breast	breast_cancer	Greenman-based
207	AKT1	26544944	WGS-WES	prostate	prostate_cancer	MutSig
207	AKT1	28452984	WES	blood	chronic_myeloid_leukemia	Recurrence-based, Literature-based
207	AKT1	23539594	Known Cancer	multiple	-	-
207	AKT1	26939876	Gene panel	breast	triple_negative_breast_cancer	Recurrence-based, Paper-specific
207	AKT1	26099045	WGS	breast	breast_cancer	Recurrence-based, Literature-based
208	AKT2	14993899	Known Cancer	multiple	-	-
208	AKT2	23619167	WES	head_and_neck	squamous_head_and_neck_cancer	Paper-specific
208	AKT2	27135926	WGS	breast	breast_cancer	Paper-specific
208	AKT2	22722201	WES	breast	breast_cancer	Greenman-based
208	AKT2	26099045	WGS	breast	breast_cancer	Recurrence-based, Literature-based
213	ALB	29625053	WES	multiple	pan-cancer_adult	PanSoftWare
213	ALB	28297679	WES	hepatobiliary	cholangiocarcinoma	MutSig
213	ALB	22634756	WGS	hepatobiliary	hepatocellular_carcinoma	Paper-specific
213	ALB	27064257	WGS	hepatobiliary	pan-liver	Paper-specific
213	ALB	25822088	WES	hepatobiliary	hepatocellular_carcinoma	MutSig
213	ALB	28622513	WES	hepatobiliary	hepatocellular_carcinoma	MutSig, Recurrence-based
215	ABCD1	26824661	WGS-WES	brain	pan-glioma	MutSig
217	ALDH2	14993899	Known Cancer	multiple	-	-
238	ALK	29625053	WES	multiple	pan-cancer_adult	PanSoftWare
238	ALK	26121087	WGS	brain	neuroblastoma	Paper-specific
238	ALK	14993899	Known Cancer	multiple	-	-
238	ALK	29489754	WGS-WES	multiple	pan-cancer_paediatric	MuSiC
238	ALK	27009842	WES	peripheral_nervous_system	neuroblastoma	Paper-specific
238	ALK	24390350	WES	multiple	pan-cancer_adult	MutSig
238	ALK	29489755	WGS-WES-RNAseq	multiple	pan-cancer_paediatric	GRIN, MutSig
238	ALK	24974848	WES	thymus	thymic_carcinoma	Recurrence-based
238	ALK	23334666	WES	brain	neuroblastoma	MutSig
238	ALK	23202128	WES	brain	neuroblastoma	Recurrence-based
238	ALK	23539594	Known Cancer	multiple	-	-
238	ALK	26939876	Gene panel	breast	triple_negative_breast_cancer	Recurrence-based, Paper-specific
238	ALK	24755198	WES-gene panel	skin	melanoma	Recurrence-based
239	ALOX12	21430775	WGS-WES	blood	multiple_myeloma	MutSig
273	AMPH	22922871	WES	hepatobiliary	hepatocellular_carcinoma	Paper-specific
280	AMY2B	23636398	WES	uterus	endometrial_cancer	MuSiC
284	ANGPT1	21499247	WES	skin	melanoma	Paper-specific
286	ANK1	14993899	Known Cancer	multiple	-	-
287	ANK2	21822268	WES	bladder	bladder_cancer	Wood-based, Recurrence-based
287	ANK2	24121792	WES	bladder	bladder_cancer	Wood-based
287	ANK2	26625313	WES	bladder	bladder_cancer	MutSig
288	ANK3	21822268	WES	bladder	bladder_cancer	Wood-based, Recurrence-based
288	ANK3	24121792	WES	bladder	bladder_cancer	Wood-based
288	ANK3	24390350	WES	multiple	pan-cancer_adult	MutSig
288	ANK3	26121086	WES	brain	neuroblastoma	Recurrence-based
288	ANK3	26625313	WES	bladder	bladder_cancer	MutSig
290	ANPEP	25351205	WGS-WES	kidney	clear_cell_renal_cancer	MuSiC
316	AOX1	26824661	WGS-WES	brain	pan-glioma	MutSig
324	APC	29625053	WES	multiple	pan-cancer_adult	PanSoftWare
324	APC	22610119	WES	prostate	prostate_cancer	MutSig
324	APC	21892161	WGS	colorectal	colorectal_adenocarcinoma	MutSig
324	APC	27158780	WES	lung	lung_cancer_(all_histologies)	MutSig
324	APC	22810696	WES	colorectal	colorectal_adenocarcinoma	MutSig
324	APC	25079317	WES	stomach	gastric_adenocarcinoma	MutSig
324	APC	24700472	WES	adrenal_gland	adrenocortical_adenoma	MutSig, Recurrence-based
324	APC	18948947	Gene panel	lung	lung_adenocarcinoma	MuSiC
324	APC	28297679	WES	hepatobiliary	cholangiocarcinoma	MutSig
324	APC	14993899	Known Cancer	multiple	-	-
324	APC	27149842	WES	colorectal	colorectal_adenocarcinoma	MutSig
324	APC	26804919	WES	small_intestine	ampullary_adenocarcinoma	MutSig
324	APC	22722839	WES	prostate	prostate_cancer	Paper-specific
324	APC	24132290	WES	multiple	pan-cancer_adult	MuSiC
324	APC	24390350	WES	multiple	pan-cancer_adult	MutSig
324	APC	22327622	Gene panel	colorectal	colorectal_adenocarcinoma	Recurrence-based
324	APC	27135926	WGS	breast	breast_cancer	Paper-specific
324	APC	26000489	WES	prostate	prostate_cancer	MutSig
324	APC	22895193	WES	colorectal	colorectal_adenocarcinoma	Wood-based
324	APC	22722201	WES	breast	breast_cancer	Greenman-based
324	APC	28551381	WES-gene panel	colorectal	colorectal_adenocarcinoma	Recurrence-based
324	APC	23539594	Known Cancer	multiple	-	-
324	APC	26939876	Gene panel	breast	triple_negative_breast_cancer	Recurrence-based, Paper-specific
324	APC	26806338	WES-gene panel	small_intestine	ampullary_adenocarcinoma	Recurrence-based
324	APC	26099045	WGS	breast	breast_cancer	Recurrence-based, Literature-based
324	APC	26998897	WES	small_intestine	duodenal_adenocarcinoma	MutSig
330	BIRC3	14993899	Known Cancer	multiple	-	-
330	BIRC3	26466571	WES	blood	chronic_lymphocytic_leukemia	MutSig
338	APOB	29625053	WES	multiple	pan-cancer_adult	PanSoftWare
338	APOB	27064257	WGS	hepatobiliary	pan-liver	Paper-specific
338	APOB	26121086	WES	brain	neuroblastoma	Recurrence-based
338	APOB	28622513	WES	hepatobiliary	hepatocellular_carcinoma	MutSig, Recurrence-based
338	APOB	22484628	WES	stomach	gastric_adenocarcinoma	Recurrence-based
355	FAS	26192916	WGS-WES	blood	cutaneous_T_cell_lymphoma	MuSiC
355	FAS	14993899	Known Cancer	multiple	-	-
355	FAS	26437031	WGS-WES-Gene panel	blood	T-cell_leukemia/lymphoma	MutSig
355	FAS	21796119	WES	blood	non-Hodgkin_lymphoma	Greenman-based
355	FAS	26939876	Gene panel	breast	triple_negative_breast_cancer	Recurrence-based, Paper-specific
367	AR	29625053	WES	multiple	pan-cancer_adult	PanSoftWare
367	AR	22981675	Gene panel	prostate	prostate_cancer	Recurrence-based
367	AR	14993899	Known Cancer	multiple	-	-
367	AR	22722839	WES	prostate	prostate_cancer	Paper-specific
367	AR	24132290	WES	multiple	pan-cancer_adult	MuSiC
367	AR	26000489	WES	prostate	prostate_cancer	MutSig
367	AR	23539594	Known Cancer	multiple	-	-
369	ARAF	29625053	WES	multiple	pan-cancer_adult	PanSoftWare
369	ARAF	28297679	WES	hepatobiliary	cholangiocarcinoma	MutSig
369	ARAF	14993899	Known Cancer	multiple	-	-
373	TRIM23	24390350	WES	multiple	pan-cancer_adult	MutSig
374	AREG	25501392	WES	multiple	pan-cancer_adult	HOTNET2
387	RHOA	29625053	WES	multiple	pan-cancer_adult	PanSoftWare
387	RHOA	24476821	WES	bladder	bladder_cancer	MutSig
387	RHOA	25079317	WES	stomach	gastric_adenocarcinoma	MutSig
387	RHOA	28522256	WES	stomach	diffuse_gastric_adenocarcinoma	MutSig
387	RHOA	26192916	WGS-WES	blood	cutaneous_T_cell_lymphoma	MuSiC
387	RHOA	14993899	Known Cancer	multiple	-	-
387	RHOA	29489754	WGS-WES	multiple	pan-cancer_paediatric	MuSiC
387	RHOA	24816255	WES	stomach	diffuse_gastric_adenocarcinoma	Recurrence-based
387	RHOA	26437031	WGS-WES-Gene panel	blood	T-cell_leukemia/lymphoma	MutSig
387	RHOA	24390350	WES	multiple	pan-cancer_adult	MutSig
387	RHOA	26574607	WGS	blood	T-cell_leukemia/lymphoma	Recurrence-based
387	RHOA	27135926	WGS	breast	breast_cancer	Paper-specific
387	RHOA	24413734	WES	blood	peripheral_T-cell_lymphoma	Recurrence-based
387	RHOA	23143595	WGS-WES	blood	Burkitt&#39;s_lymphoma	Recurrence-based
387	RHOA	28988769	WES	bladder	bladder_cancer	MutSig
387	RHOA	24413737	WES	blood	angioimmunoblastic_T-cell_lymphoma	Recurrence-based
387	RHOA	24816253	WGS	stomach	gastric_adenocarcinoma	Youn-based
387	RHOA	24584070	WES	blood	angioimmunoblastic_T-cell_lymphoma	Recurrence-based
388	RHOB	29625053	WES	multiple	pan-cancer_adult	PanSoftWare
388	RHOB	24476821	WES	bladder	bladder_cancer	MutSig
388	RHOB	28988769	WES	bladder	bladder_cancer	MutSig
393	ARHGAP4	25501392	WES	multiple	pan-cancer_adult	HOTNET2
394	ARHGAP5	14993899	Known Cancer	multiple	-	-
399	RHOH	14993899	Known Cancer	multiple	-	-
405	ARNT	14993899	Known Cancer	multiple	-	-
414	ARSD	28249600	WES	blood	acute_myeloid_leukemia	MutSig
414	ARSD	28479318	WES-gene panel	blood	cutaneous_DLBCL	MuSiC
435	ASL	22156295	WES	pancreas	pancreatic_ductal_adenocarcinoma	Recurrence-based
460	ASTN1	18772396	WES	brain	glioblastoma	Wood-based
460	ASTN1	27058444	WGS-WES	esophagus	esophageal_squamous_carcinoma	MutSig
463	ZFHX3	29625053	WES	multiple	pan-cancer_adult	PanSoftWare
463	ZFHX3	23636398	WES	uterus	endometrial_cancer	MuSiC
463	ZFHX3	14993899	Known Cancer	multiple	-	-
463	ZFHX3	27348297	WES	uterus	endometrial_cancer	MutSig
463	ZFHX3	22722839	WES	prostate	prostate_cancer	Paper-specific
463	ZFHX3	21822268	WES	bladder	bladder_cancer	Wood-based, Recurrence-based
463	ZFHX3	24390350	WES	multiple	pan-cancer_adult	MutSig
463	ZFHX3	26503331	WES-gene panel	lung	lung_squamous_cell_carcinoma	MutSig
463	ZFHX3	26000489	WES	prostate	prostate_cancer	MutSig
466	ATF1	14993899	Known Cancer	multiple	-	-
471	ATIC	14993899	Known Cancer	multiple	-	-
472	ATM	26909576	WGS	pancreas	pancreatic_cancer_(all_histologies)	HOTNET2, OncodriveFM, MutSig
472	ATM	29625053	WES	multiple	pan-cancer_adult	PanSoftWare
472	ATM	24121791	WES	bladder	bladder_cancer	Recurrence-based
472	ATM	22610119	WES	prostate	prostate_cancer	MutSig
472	ATM	22981675	Gene panel	prostate	prostate_cancer	Recurrence-based
472	ATM	23103869	WES	pancreas	pancreatic_ductal_adenocarcinoma	MuSiC
472	ATM	27158780	WES	lung	lung_cancer_(all_histologies)	MutSig
472	ATM	28256603	WES plus targeted deep resequencing	head_and_neck	nasopharyngeal_carcinoma	Literature-based, Paper-specific
472	ATM	18948947	Gene panel	lung	lung_adenocarcinoma	MuSiC
472	ATM	28297679	WES	hepatobiliary	cholangiocarcinoma	MutSig
472	ATM	22634756	WGS	hepatobiliary	hepatocellular_carcinoma	Paper-specific
472	ATM	14993899	Known Cancer	multiple	-	-
472	ATM	24487277	WES	kidney	clear_cell_renal_cancer	Literature-based
472	ATM	26804919	WES	small_intestine	ampullary_adenocarcinoma	MutSig
472	ATM	24121792	WES	bladder	bladder_cancer	Wood-based
472	ATM	22980975	WES	lung	lung_adenocarcinoma	InVEx
472	ATM	27687306	WES	lung	lung_adenocarcinoma	InVEx
472	ATM	24132290	WES	multiple	pan-cancer_adult	MuSiC
472	ATM	26632267	WES-gene panel	bone	osteosarcoma	Recurrence-based, IntOGen
472	ATM	23415222	WES	blood	chronic_lymphocytic_leukemia	MutSig
472	ATM	26466571	WES	blood	chronic_lymphocytic_leukemia	MutSig
472	ATM	24390350	WES	multiple	pan-cancer_adult	MutSig
472	ATM	25501392	WES	multiple	pan-cancer_adult	HOTNET2
472	ATM	22327622	Gene panel	colorectal	colorectal_adenocarcinoma	Recurrence-based
472	ATM	22327622	Gene panel	lung	non-small_cell_lung_cancer	Recurrence-based
472	ATM	27135926	WGS	breast	breast_cancer	Paper-specific
472	ATM	24413734	WES	blood	peripheral_T-cell_lymphoma	Recurrence-based
472	ATM	22158541	WES	blood	chronic_lymphocytic_leukemia	Recurrence-based
472	ATM	28988769	WES	bladder	bladder_cancer	MutSig
472	ATM	26000489	WES	prostate	prostate_cancer	MutSig
472	ATM	22895193	WES	colorectal	colorectal_adenocarcinoma	Wood-based
472	ATM	26544944	WGS-WES	prostate	prostate_cancer	MutSig
472	ATM	28810144	WES plus targeted deep resequencing	pancreas	pancreatic_ductal_adenocarcinoma	MutSig
472	ATM	23539594	Known Cancer	multiple	-	-
472	ATM	22150006	WGS-WES	blood	chronic_lymphocytic_leukemia	MutSig
472	ATM	26939876	Gene panel	breast	triple_negative_breast_cancer	Recurrence-based, Paper-specific
476	ATP1A1	14993899	Known Cancer	multiple	-	-
488	ATP2A2	21399634	WES	blood	acute_monocytic_leukemia	Recurrence-based
492	ATP2B3	14993899	Known Cancer	multiple	-	-
495	ATP4A	22484628	WES	stomach	gastric_adenocarcinoma	Recurrence-based
506	ATP5F1B	24390350	WES	multiple	pan-cancer_adult	MutSig
526	ATP6V1B2	28064239	WES	blood	follicular_lymphoma	MuSiC
545	ATR	29625053	WES	multiple	pan-cancer_adult	PanSoftWare
545	ATR	23636398	WES	uterus	endometrial_cancer	MuSiC
545	ATR	14993899	Known Cancer	multiple	-	-
545	ATR	24132290	WES	multiple	pan-cancer_adult	MuSiC
545	ATR	27135926	WGS	breast	breast_cancer	Paper-specific
545	ATR	26099045	WGS	breast	breast_cancer	Recurrence-based, Literature-based
546	ATRX	29625053	WES	multiple	pan-cancer_adult	PanSoftWare
546	ATRX	24120142	WES	brain	glioblastoma	InVEx, MutSig
546	ATRX	26061751	WES	brain	low_grade_glioma	MutSig
546	ATRX	26824661	WGS-WES	brain	pan-glioma	MutSig
546	ATRX	24705250	WES	brain	astrocytoma	Recurrence-based
546	ATRX	14993899	Known Cancer	multiple	-	-
546	ATRX	29489754	WGS-WES	multiple	pan-cancer_paediatric	MuSiC
546	ATRX	21252315	WES	pancreas	pancreatic_neuroendocrine_tumours	Recurrence-based
546	ATRX	24336570	WES	brain	low_grade_glioma	Recurrence-based
546	ATRX	24132290	WES	multiple	pan-cancer_adult	MuSiC
546	ATRX	26632267	WES-gene panel	bone	osteosarcoma	Recurrence-based, IntOGen
546	ATRX	27009842	WES	peripheral_nervous_system	neuroblastoma	Paper-specific
546	ATRX	29489755	WGS-WES-RNAseq	multiple	pan-cancer_paediatric	GRIN, MutSig
546	ATRX	27135926	WGS	breast	breast_cancer	Paper-specific
546	ATRX	25743702	WGS-WES	adrenal_gland	adrenocortical_carcinoma	Recurrence-based
546	ATRX	23334666	WES	brain	neuroblastoma	MutSig
546	ATRX	22286061	WES	brain	glioblastoma	Recurrence-based
546	ATRX	29100075	WGS-WES	soft_tissue	soft_tissue_sarcoma	MuSiC
546	ATRX	23539594	Known Cancer	multiple	-	-
546	ATRX	27270107	WES	brain	glioblastoma	MutComFocal
546	ATRX	24705251	WGS-WES	brain	paediatric_high-grade_glioma	Recurrence-based
546	ATRX	23583981	WGS-WES	brain	paediatric_low_grade_glioma	MuSiC, Paper-specific
546	ATRX	24880341	WES	brain	glioma	Recurrence-based
546	ATRX	25301631	WES	lung	lung_adenocarcinoma	Literature-based
547	KIF1A	29625053	WES	multiple	pan-cancer_adult	PanSoftWare
563	AZGP1	24390350	WES	multiple	pan-cancer_adult	MutSig
567	B2M	29625053	WES	multiple	pan-cancer_adult	PanSoftWare
567	B2M	26091043	WES	skin	melanoma	InVEx, MutSig
567	B2M	14993899	Known Cancer	multiple	-	-
567	B2M	26437031	WGS-WES-Gene panel	blood	T-cell_leukemia/lymphoma	MutSig
567	B2M	24390350	WES	multiple	pan-cancer_adult	MutSig
567	B2M	25501392	WES	multiple	pan-cancer_adult	HOTNET2
567	B2M	22343534	WES	blood	diffuse_large_B-cell_lymphoma	MutSig
567	B2M	21796119	WES	blood	non-Hodgkin_lymphoma	Greenman-based
567	B2M	24413734	WES	blood	peripheral_T-cell_lymphoma	Recurrence-based
567	B2M	21804550	WES	blood	diffuse_large_B-cell_lymphoma	Paper-specific
567	B2M	23539594	Known Cancer	multiple	-	-
577	ADGRB3	18772397	WES	pancreas	pancreatic_ductal_adenocarcinoma	Wood-based
577	ADGRB3	20668451	Gene panel	lung	lung_cancer_(all_histologies)	Wood-based
577	ADGRB3	22484628	WES	stomach	gastric_adenocarcinoma	Recurrence-based
577	ADGRB3	23583981	WGS-WES	brain	paediatric_low_grade_glioma	MuSiC, Paper-specific
580	BARD1	14993899	Known Cancer	multiple	-	-
581	BAX	14993899	Known Cancer	multiple	-	-
595	CCND1	29625053	WES	multiple	pan-cancer_adult	PanSoftWare
595	CCND1	23636398	WES	uterus	endometrial_cancer	MuSiC
595	CCND1	21430775	WGS-WES	blood	multiple_myeloma	MutSig
595	CCND1	28297679	WES	hepatobiliary	cholangiocarcinoma	MutSig
595	CCND1	27064257	WGS	hepatobiliary	pan-liver	Paper-specific
595	CCND1	14993899	Known Cancer	multiple	-	-
595	CCND1	27348297	WES	uterus	endometrial_cancer	MutSig
595	CCND1	24132290	WES	multiple	pan-cancer_adult	MuSiC
595	CCND1	24390350	WES	multiple	pan-cancer_adult	MutSig
595	CCND1	25501392	WES	multiple	pan-cancer_adult	HOTNET2
595	CCND1	28098136	WGS-WES	head_and_neck	nasopharyngeal_carcinoma	MutSig
595	CCND1	26258846	WES	hepatobiliary	biliary_tract_cancer	MutSig
595	CCND1	27135926	WGS	breast	breast_cancer	Paper-specific
595	CCND1	28352668	WES-gene panel	parathyroid_gland	parathyroid_carcinoma	Recurrence-based, Literature-based
595	CCND1	26000489	WES	prostate	prostate_cancer	MutSig
595	CCND1	25362482	WES	hepatobiliary	hepatocellular_carcinoma	MutSig
595	CCND1	24705251	WGS-WES	brain	paediatric_high-grade_glioma	Recurrence-based
595	CCND1	26099045	WGS	breast	breast_cancer	Recurrence-based, Literature-based
596	BCL2	29625053	WES	multiple	pan-cancer_adult	PanSoftWare
596	BCL2	14993899	Known Cancer	multiple	-	-
596	BCL2	28064239	WES	blood	follicular_lymphoma	MuSiC
596	BCL2	21796119	WES	blood	non-Hodgkin_lymphoma	Greenman-based
596	BCL2	21804550	WES	blood	diffuse_large_B-cell_lymphoma	Paper-specific
596	BCL2	23539594	Known Cancer	multiple	-	-
602	BCL3	28297679	WES	hepatobiliary	cholangiocarcinoma	MutSig
602	BCL3	14993899	Known Cancer	multiple	-	-
604	BCL6	14993899	Known Cancer	multiple	-	-
604	BCL6	21796119	WES	blood	non-Hodgkin_lymphoma	Greenman-based
605	BCL7A	14993899	Known Cancer	multiple	-	-
605	BCL7A	28064239	WES	blood	follicular_lymphoma	MuSiC
607	BCL9	14993899	Known Cancer	multiple	-	-
608	TNFRSF17	14993899	Known Cancer	multiple	-	-
613	BCR	14993899	Known Cancer	multiple	-	-
613	BCR	29489754	WGS-WES	multiple	pan-cancer_paediatric	MuSiC
613	BCR	22343534	WES	blood	diffuse_large_B-cell_lymphoma	MutSig
613	BCR	26648538	WGS-Gene panel	blood	chronic_myelomonocytic_leukemia	Recurrence-based
639	PRDM1	14993899	Known Cancer	multiple	-	-
639	PRDM1	24390350	WES	multiple	pan-cancer_adult	MutSig
639	PRDM1	27135926	WGS	breast	breast_cancer	Paper-specific
639	PRDM1	21804550	WES	blood	diffuse_large_B-cell_lymphoma	Paper-specific
639	PRDM1	23539594	Known Cancer	multiple	-	-
641	BLM	14993899	Known Cancer	multiple	-	-
653	BMP5	14993899	Known Cancer	multiple	-	-
657	BMPR1A	14993899	Known Cancer	multiple	-	-
666	BOK	26998897	WES	small_intestine	duodenal_adenocarcinoma	MutSig
667	DST	20399149	Gene panel	brain	glioblastoma	Paper-specific
668	FOXL2	14993899	Known Cancer	multiple	-	-
668	FOXL2	23539594	Known Cancer	multiple	-	-
672	BRCA1	29625053	WES	multiple	pan-cancer_adult	PanSoftWare
672	BRCA1	21720365	WES	ovary	ovarian_cancer	MutSig, MuSiC
672	BRCA1	27087322	WGS	prostate	prostate_cancer	Recurrence-based
672	BRCA1	27325650	WES	penis	penile_squamous_cancer	IntOGen, Literature-based
672	BRCA1	14993899	Known Cancer	multiple	-	-
672	BRCA1	28296713	WES	skin	mucosal_melanoma	Recurrence-based
672	BRCA1	24132290	WES	multiple	pan-cancer_adult	MuSiC
672	BRCA1	24390350	WES	multiple	pan-cancer_adult	MutSig
672	BRCA1	27135926	WGS	breast	breast_cancer	Paper-specific
672	BRCA1	26017449	WGS	ovary	ovarian_serous_carcinoma	MutSig, IntOGen
672	BRCA1	27161491	Gene panel	breast	breast_cancer	Recurrence-based
672	BRCA1	26000489	WES	prostate	prostate_cancer	MutSig
672	BRCA1	22722201	WES	breast	breast_cancer	Greenman-based
672	BRCA1	23539594	Known Cancer	multiple	-	-
672	BRCA1	26099045	WGS	breast	breast_cancer	Recurrence-based, Literature-based
672	BRCA1	25301631	WES	lung	lung_adenocarcinoma	Literature-based
673	BRAF	29625053	WES	multiple	pan-cancer_adult	PanSoftWare
673	BRAF	22622578	WGS	skin	melanoma	MutSig
673	BRAF	24413733	WES	brain	craniopharyngioma	MutSig
673	BRAF	27158780	WES	lung	lung_cancer_(all_histologies)	MutSig
673	BRAF	22810696	WES	colorectal	colorectal_adenocarcinoma	MutSig
673	BRAF	24120142	WES	brain	glioblastoma	InVEx, MutSig
673	BRAF	25417114	WES	thyroid	papillary_thyroid_cancer	MutSig
673	BRAF	25079552	WES	lung	lung_adenocarcinoma	MutSig
673	BRAF	26091043	WES	skin	melanoma	InVEx, MutSig
673	BRAF	26824661	WGS-WES	brain	pan-glioma	MutSig
673	BRAF	26192916	WGS-WES	blood	cutaneous_T_cell_lymphoma	MuSiC
673	BRAF	28297679	WES	hepatobiliary	cholangiocarcinoma	MutSig
673	BRAF	14993899	Known Cancer	multiple	-	-
673	BRAF	27149842	WES	colorectal	colorectal_adenocarcinoma	MutSig
673	BRAF	29489754	WGS-WES	multiple	pan-cancer_paediatric	MuSiC
673	BRAF	22817889	WES	skin	melanoma	InVEx
673	BRAF	22980975	WES	lung	lung_adenocarcinoma	InVEx
673	BRAF	23817572	WGS	brain	astrocytoma	MuSiC
673	BRAF	27687306	WES	lung	lung_adenocarcinoma	InVEx
673	BRAF	20668451	Gene panel	ovary	ovarian_cancer	Wood-based
673	BRAF	24132290	WES	multiple	pan-cancer_adult	MuSiC
673	BRAF	22842228	WES	skin	melanoma	MuSiC
673	BRAF	26214590	WES	skin	melanoma	MutSig
673	BRAF	25576899	WES-gene panel	thyroid	anaplastic_thyroid_carcinoma	Recurrence-based, Literature-based
673	BRAF	26466571	WES	blood	chronic_lymphocytic_leukemia	MutSig
673	BRAF	24390350	WES	multiple	pan-cancer_adult	MutSig
673	BRAF	25501392	WES	multiple	pan-cancer_adult	HOTNET2
673	BRAF	22327622	Gene panel	colorectal	colorectal_adenocarcinoma	Recurrence-based
673	BRAF	22327622	Gene panel	lung	non-small_cell_lung_cancer	Recurrence-based
673	BRAF	27135926	WGS	breast	breast_cancer	Paper-specific
673	BRAF	22197931	WES	skin	melanoma	Recurrence-based
673	BRAF	26941397	WES	thyroid	papillary_thyroid_cancer	MutSig
673	BRAF	22158541	WES	blood	chronic_lymphocytic_leukemia	Recurrence-based
673	BRAF	26000489	WES	prostate	prostate_cancer	MutSig
673	BRAF	26343386	WGS-WES-Gene panel	skin	desmoplastic_melanoma	Recurrence-based, Literature-based
673	BRAF	27236916	WES-gene panel	thyroid	papillary_thyroid_cancer	Recurrence-based
673	BRAF	24859340	WGS	head_and_neck	ameloblastoma	Recurrence-based
673	BRAF	26544944	WGS-WES	prostate	prostate_cancer	MutSig
673	BRAF	23539594	Known Cancer	multiple	-	-
673	BRAF	21499247	WES	skin	melanoma	Paper-specific
673	BRAF	24705251	WGS-WES	brain	paediatric_high-grade_glioma	Recurrence-based
673	BRAF	26806338	WES-gene panel	small_intestine	ampullary_adenocarcinoma	Recurrence-based
673	BRAF	22237106	WGS	blood	acute_lymphoblastic_leukemia	Recurrence-based
673	BRAF	23583981	WGS-WES	brain	paediatric_low_grade_glioma	MuSiC, Paper-specific
675	BRCA2	29625053	WES	multiple	pan-cancer_adult	PanSoftWare
675	BRCA2	22981675	Gene panel	prostate	prostate_cancer	Recurrence-based
675	BRCA2	21720365	WES	ovary	ovarian_cancer	MutSig, MuSiC
675	BRCA2	27087322	WGS	prostate	prostate_cancer	Recurrence-based
675	BRCA2	28297679	WES	hepatobiliary	cholangiocarcinoma	MutSig
675	BRCA2	14993899	Known Cancer	multiple	-	-
675	BRCA2	24132290	WES	multiple	pan-cancer_adult	MuSiC
675	BRCA2	26632267	WES-gene panel	bone	osteosarcoma	Recurrence-based, IntOGen
675	BRCA2	27135926	WGS	breast	breast_cancer	Paper-specific
675	BRCA2	26017449	WGS	ovary	ovarian_serous_carcinoma	MutSig, IntOGen
675	BRCA2	27161491	Gene panel	breast	breast_cancer	Recurrence-based
675	BRCA2	26000489	WES	prostate	prostate_cancer	MutSig
675	BRCA2	27313181	WES	stomach	mucinous_gastric_cancer	Recurrence-based
675	BRCA2	22722201	WES	breast	breast_cancer	Greenman-based
675	BRCA2	28810144	WES plus targeted deep resequencing	pancreas	pancreatic_ductal_adenocarcinoma	MutSig
675	BRCA2	23539594	Known Cancer	multiple	-	-
675	BRCA2	22156295	WES	pancreas	pancreatic_ductal_adenocarcinoma	Recurrence-based
675	BRCA2	26939876	Gene panel	breast	triple_negative_breast_cancer	Recurrence-based, Paper-specific
675	BRCA2	26099045	WGS	breast	breast_cancer	Recurrence-based, Literature-based
677	ZFP36L1	29625053	WES	multiple	pan-cancer_adult	PanSoftWare
677	ZFP36L1	23000897	WES	breast	breast_cancer	MuSiC
677	ZFP36L1	24476821	WES	bladder	bladder_cancer	MutSig
677	ZFP36L1	26451490	WES	breast	breast_cancer	MutSig
677	ZFP36L1	27135926	WGS	breast	breast_cancer	Paper-specific
677	ZFP36L1	27161491	Gene panel	breast	breast_cancer	Recurrence-based
677	ZFP36L1	28988769	WES	bladder	bladder_cancer	MutSig
678	ZFP36L2	29625053	WES	multiple	pan-cancer_adult	PanSoftWare
678	ZFP36L2	27149842	WES	colorectal	colorectal_adenocarcinoma	MutSig
678	ZFP36L2	26437031	WGS-WES-Gene panel	blood	T-cell_leukemia/lymphoma	MutSig
678	ZFP36L2	29489755	WGS-WES-RNAseq	multiple	pan-cancer_paediatric	GRIN, MutSig
688	KLF5	29625053	WES	multiple	pan-cancer_adult	PanSoftWare
688	KLF5	24476821	WES	bladder	bladder_cancer	MutSig
688	KLF5	27149842	WES	colorectal	colorectal_adenocarcinoma	MutSig
688	KLF5	25501392	WES	multiple	pan-cancer_adult	HOTNET2
688	KLF5	28988769	WES	bladder	bladder_cancer	MutSig
694	BTG1	14993899	Known Cancer	multiple	-	-
694	BTG1	22343534	WES	blood	diffuse_large_B-cell_lymphoma	MutSig
694	BTG1	29489755	WGS-WES-RNAseq	multiple	pan-cancer_paediatric	GRIN, MutSig
694	BTG1	21796119	WES	blood	non-Hodgkin_lymphoma	Greenman-based
694	BTG1	24413735	WES	blood	acute_lymphoblastic_leukemia	Greenman-based
695	BTK	14993899	Known Cancer	multiple	-	-
695	BTK	28064239	WES	blood	follicular_lymphoma	MuSiC
701	BUB1B	14993899	Known Cancer	multiple	-	-
701	BUB1B	27135926	WGS	breast	breast_cancer	Paper-specific
710	SERPING1	27149842	WES	colorectal	colorectal_adenocarcinoma	MutSig
718	C3	26121086	WES	brain	neuroblastoma	Recurrence-based
773	CACNA1A	29625053	WES	multiple	pan-cancer_adult	PanSoftWare
775	CACNA1C	27313181	WES	stomach	mucinous_gastric_cancer	Recurrence-based
776	CACNA1D	14993899	Known Cancer	multiple	-	-
777	CACNA1E	22817890	WGS	blood	acute_myeloid_leukemia	Recurrence-based
781	CACNA2D1	18772397	WES	pancreas	pancreatic_ductal_adenocarcinoma	Wood-based
781	CACNA2D1	22510280	WES	lung	non-small_cell_lung_cancer	Literature-based, Paper-specific
799	CALCR	24120142	WES	brain	glioblastoma	InVEx, MutSig
800	CALD1	26909576	WGS	pancreas	pancreatic_cancer_(all_histologies)	HOTNET2, OncodriveFM, MutSig
811	CALR	14993899	Known Cancer	multiple	-	-
811	CALR	24325356	WES	blood	myeloproliferative_neoplasm	Recurrence-based
811	CALR	22343534	WES	blood	diffuse_large_B-cell_lymphoma	MutSig
811	CALR	24325359	WES	blood	myeloproliferative_neoplasm	Paper-specific
833	CARS	14993899	Known Cancer	multiple	-	-
836	CASP3	14993899	Known Cancer	multiple	-	-
841	CASP8	26934577	WES	head_and_neck	oral_squamous_cell_carcinoma	OncodriveFM, Youn-based
841	CASP8	29625053	WES	multiple	pan-cancer_adult	PanSoftWare
841	CASP8	26950094	WES-gene panel	skin	skin_basal_cell_carcinoma	MutSig, TumOnc
841	CASP8	22810696	WES	colorectal	colorectal_adenocarcinoma	MutSig
841	CASP8	25631445	WES	head_and_neck	squamous_head_and_neck_cancer	MutSig
841	CASP8	26451490	WES	breast	breast_cancer	MutSig
841	CASP8	14993899	Known Cancer	multiple	-	-
841	CASP8	24390350	WES	multiple	pan-cancer_adult	MutSig
841	CASP8	27135926	WGS	breast	breast_cancer	Paper-specific
841	CASP8	28988769	WES	bladder	bladder_cancer	MutSig
841	CASP8	22722201	WES	breast	breast_cancer	Greenman-based
841	CASP8	21798893	WES	head_and_neck	squamous_head_and_neck_cancer	MutSig
841	CASP8	28112728	WGS	cervix	cervical_cancer_(all_histologies)	MutSig
841	CASP8	23539594	Known Cancer	multiple	-	-
841	CASP8	26099045	WGS	breast	breast_cancer	Recurrence-based, Literature-based
842	CASP9	14993899	Known Cancer	multiple	-	-
861	RUNX1	29625053	WES	multiple	pan-cancer_adult	PanSoftWare
861	RUNX1	23000897	WES	breast	breast_cancer	MuSiC
861	RUNX1	23634996	WGS-WES	blood	acute_myeloid_leukemia	MuSiC
861	RUNX1	26451490	WES	breast	breast_cancer	MutSig
861	RUNX1	14993899	Known Cancer	multiple	-	-
861	RUNX1	21339757	WES	blood	acute_myeloid_leukemia	Recurrence-based
861	RUNX1	24132290	WES	multiple	pan-cancer_adult	MuSiC
861	RUNX1	24390350	WES	multiple	pan-cancer_adult	MutSig
861	RUNX1	25501392	WES	multiple	pan-cancer_adult	HOTNET2
861	RUNX1	29489755	WGS-WES-RNAseq	multiple	pan-cancer_paediatric	GRIN, MutSig
861	RUNX1	27063598	WES-gene panel	blood	acute_promyelocytic_leukemia	Recurrence-based
861	RUNX1	26648538	WGS-Gene panel	blood	chronic_myelomonocytic_leukemia	Recurrence-based
861	RUNX1	26908133	WGS-WES	blood	chronic_myelomonocytic_leukemia	DrGap
861	RUNX1	27135926	WGS	breast	breast_cancer	Paper-specific
861	RUNX1	27161491	Gene panel	breast	breast_cancer	Recurrence-based
861	RUNX1	26457647	WES-gene panel	blood	juvenile_myelomonocytic_leukemia	Paper-specific, Literature-based
861	RUNX1	26437033	WES-gene panel	breast	breast_fibroepithelial_tumours	Recurrence-based
861	RUNX1	28452984	WES	blood	chronic_myeloid_leukemia	Recurrence-based, Literature-based
861	RUNX1	23539594	Known Cancer	multiple	-	-
861	RUNX1	26939876	Gene panel	breast	triple_negative_breast_cancer	Recurrence-based, Paper-specific
861	RUNX1	22817890	WGS	blood	acute_myeloid_leukemia	Recurrence-based
861	RUNX1	26099045	WGS	breast	breast_cancer	Recurrence-based, Literature-based
861	RUNX1	21909114	WES	blood	myelodysplasia	Recurrence-based
861	RUNX1	22237106	WGS	blood	acute_lymphoblastic_leukemia	Recurrence-based
862	RUNX1T1	14993899	Known Cancer	multiple	-	-
862	RUNX1T1	20668451	Gene panel	lung	lung_cancer_(all_histologies)	Wood-based
862	RUNX1T1	22941189	WES	lung	small_cell_lung_cancer	Wood-based
863	CBFA2T3	14993899	Known Cancer	multiple	-	-
863	CBFA2T3	26648538	WGS-Gene panel	blood	chronic_myelomonocytic_leukemia	Recurrence-based
865	CBFB	29625053	WES	multiple	pan-cancer_adult	PanSoftWare
865	CBFB	22722202	WES	breast	breast_cancer	MutSig
865	CBFB	23000897	WES	breast	breast_cancer	MuSiC
865	CBFB	26451490	WES	breast	breast_cancer	MutSig
865	CBFB	14993899	Known Cancer	multiple	-	-
865	CBFB	20668451	Gene panel	breast	breast_cancer	Wood-based
865	CBFB	24132290	WES	multiple	pan-cancer_adult	MuSiC
865	CBFB	24390350	WES	multiple	pan-cancer_adult	MutSig
865	CBFB	28027327	WES	breast	breast_cancer	MutSig
865	CBFB	25501392	WES	multiple	pan-cancer_adult	HOTNET2
865	CBFB	29489755	WGS-WES-RNAseq	multiple	pan-cancer_paediatric	GRIN, MutSig
865	CBFB	27135926	WGS	breast	breast_cancer	Paper-specific
865	CBFB	24390348	WES	cervix	cervical_cancer_(all_histologies)	MutSig
865	CBFB	27161491	Gene panel	breast	breast_cancer	Recurrence-based
867	CBL	14993899	Known Cancer	multiple	-	-
867	CBL	22980975	WES	lung	lung_adenocarcinoma	InVEx
867	CBL	29489755	WGS-WES-RNAseq	multiple	pan-cancer_paediatric	GRIN, MutSig
867	CBL	26648538	WGS-Gene panel	blood	chronic_myelomonocytic_leukemia	Recurrence-based
867	CBL	26908133	WGS-WES	blood	chronic_myelomonocytic_leukemia	DrGap
867	CBL	26343386	WGS-WES-Gene panel	skin	desmoplastic_melanoma	Recurrence-based, Literature-based
867	CBL	26457647	WES-gene panel	blood	juvenile_myelomonocytic_leukemia	Paper-specific, Literature-based
867	CBL	23539594	Known Cancer	multiple	-	-
867	CBL	24896186	WES	brain	intracranial_germ_cell	Recurrence-based
867	CBL	26939876	Gene panel	breast	triple_negative_breast_cancer	Recurrence-based, Paper-specific
868	CBLB	14993899	Known Cancer	multiple	-	-
868	CBLB	26437031	WGS-WES-Gene panel	blood	T-cell_leukemia/lymphoma	MutSig
868	CBLB	27135926	WGS	breast	breast_cancer	Paper-specific
887	CCKBR	20668451	Gene panel	lung	lung_cancer_(all_histologies)	Wood-based
892	CCNC	14993899	Known Cancer	multiple	-	-
894	CCND2	14993899	Known Cancer	multiple	-	-
894	CCND2	29489755	WGS-WES-RNAseq	multiple	pan-cancer_paediatric	GRIN, MutSig
894	CCND2	24705251	WGS-WES	brain	paediatric_high-grade_glioma	Recurrence-based
896	CCND3	23000897	WES	breast	breast_cancer	MuSiC
896	CCND3	24476821	WES	bladder	bladder_cancer	MutSig
896	CCND3	14993899	Known Cancer	multiple	-	-
896	CCND3	29489754	WGS-WES	multiple	pan-cancer_paediatric	MuSiC
896	CCND3	22343534	WES	blood	diffuse_large_B-cell_lymphoma	MutSig
896	CCND3	29489755	WGS-WES-RNAseq	multiple	pan-cancer_paediatric	GRIN, MutSig
896	CCND3	21796119	WES	blood	non-Hodgkin_lymphoma	Greenman-based
896	CCND3	26258846	WES	hepatobiliary	biliary_tract_cancer	MutSig
896	CCND3	27135926	WGS	breast	breast_cancer	Paper-specific
896	CCND3	21804550	WES	blood	diffuse_large_B-cell_lymphoma	Paper-specific
896	CCND3	24705251	WGS-WES	brain	paediatric_high-grade_glioma	Recurrence-based
896	CCND3	21399634	WES	blood	acute_monocytic_leukemia	Recurrence-based
898	CCNE1	14993899	Known Cancer	multiple	-	-
898	CCNE1	25501392	WES	multiple	pan-cancer_adult	HOTNET2
898	CCNE1	26258846	WES	hepatobiliary	biliary_tract_cancer	MutSig
898	CCNE1	27135926	WGS	breast	breast_cancer	Paper-specific
898	CCNE1	26939876	Gene panel	breast	triple_negative_breast_cancer	Recurrence-based, Paper-specific
910	CD1B	22510280	WES	lung	non-small_cell_lung_cancer	Literature-based, Paper-specific
912	CD1D	24390350	WES	multiple	pan-cancer_adult	MutSig
912	CD1D	25501392	WES	multiple	pan-cancer_adult	HOTNET2
940	CD28	26192916	WGS-WES	blood	cutaneous_T_cell_lymphoma	MuSiC
940	CD28	14993899	Known Cancer	multiple	-	-
940	CD28	26437031	WGS-WES-Gene panel	blood	T-cell_leukemia/lymphoma	MutSig
940	CD28	26258847	WES-gene panel	blood	cutaneous_T_cell_lymphoma	Recurrence-based
940	CD28	24584070	WES	blood	angioimmunoblastic_T-cell_lymphoma	Recurrence-based
944	TNFSF8	21499247	WES	skin	melanoma	Paper-specific
948	CD36	21804550	WES	blood	diffuse_large_B-cell_lymphoma	Paper-specific
948	CD36	22158541	WES	blood	chronic_lymphocytic_leukemia	Recurrence-based
955	ENTPD6	26790612	WES	head_and_neck	squamous_head_and_neck_cancer	MuSiC
965	CD58	26437031	WGS-WES-Gene panel	blood	T-cell_leukemia/lymphoma	MutSig
965	CD58	22343534	WES	blood	diffuse_large_B-cell_lymphoma	MutSig
965	CD58	21796119	WES	blood	non-Hodgkin_lymphoma	Greenman-based
965	CD58	24413734	WES	blood	peripheral_T-cell_lymphoma	Recurrence-based
965	CD58	21804550	WES	blood	diffuse_large_B-cell_lymphoma	Paper-specific
970	CD70	29625053	WES	multiple	pan-cancer_adult	PanSoftWare
970	CD70	24390350	WES	multiple	pan-cancer_adult	MutSig
970	CD70	22343534	WES	blood	diffuse_large_B-cell_lymphoma	MutSig
970	CD70	21796119	WES	blood	non-Hodgkin_lymphoma	Greenman-based
972	CD74	14993899	Known Cancer	multiple	-	-
973	CD79A	14993899	Known Cancer	multiple	-	-
973	CD79A	24362818	WGS-WES	blood	follicular_lymphoma	Recurrence-based
974	CD79B	29625053	WES	multiple	pan-cancer_adult	PanSoftWare
974	CD79B	14993899	Known Cancer	multiple	-	-
974	CD79B	28064239	WES	blood	follicular_lymphoma	MuSiC
974	CD79B	24390350	WES	multiple	pan-cancer_adult	MutSig
974	CD79B	22343534	WES	blood	diffuse_large_B-cell_lymphoma	MutSig
974	CD79B	28479318	WES-gene panel	blood	cutaneous_DLBCL	MuSiC
974	CD79B	21796119	WES	blood	non-Hodgkin_lymphoma	Greenman-based
974	CD79B	24362818	WGS-WES	blood	follicular_lymphoma	Recurrence-based
974	CD79B	21804550	WES	blood	diffuse_large_B-cell_lymphoma	Paper-specific
995	CDC25C	20668451	Gene panel	lung	lung_cancer_(all_histologies)	Wood-based
996	CDC27	22810696	WES	colorectal	colorectal_adenocarcinoma	MutSig
996	CDC27	24390350	WES	multiple	pan-cancer_adult	MutSig
996	CDC27	25609015	WES	testis	testicular_germ_cell_cancer	MutSig
998	CDC42	19657110	WGS	blood	acute_myeloid_leukemia	Paper-specific
999	CDH1	29625053	WES	multiple	pan-cancer_adult	PanSoftWare
999	CDH1	20601955	Gene panel	soft_tissue	soft_tissue_sarcoma	Recurrence-based
999	CDH1	23000897	WES	breast	breast_cancer	MuSiC
999	CDH1	25079317	WES	stomach	gastric_adenocarcinoma	MutSig
999	CDH1	28522256	WES	stomach	diffuse_gastric_adenocarcinoma	MutSig
999	CDH1	26451490	WES	breast	breast_cancer	MutSig
999	CDH1	14993899	Known Cancer	multiple	-	-
999	CDH1	24132290	WES	multiple	pan-cancer_adult	MuSiC
999	CDH1	24390350	WES	multiple	pan-cancer_adult	MutSig
999	CDH1	28027327	WES	breast	breast_cancer	MutSig
999	CDH1	22327622	Gene panel	colorectal	colorectal_adenocarcinoma	Recurrence-based
999	CDH1	27135926	WGS	breast	breast_cancer	Paper-specific
999	CDH1	27161491	Gene panel	breast	breast_cancer	Recurrence-based
999	CDH1	27313181	WES	stomach	mucinous_gastric_cancer	Recurrence-based
999	CDH1	22722201	WES	breast	breast_cancer	Greenman-based
999	CDH1	23539594	Known Cancer	multiple	-	-
999	CDH1	24816253	WGS	stomach	gastric_adenocarcinoma	Youn-based
999	CDH1	27891760	WES-gene panel	stomach	gastric_adenocarcinoma	Recurrence-based
999	CDH1	26099045	WGS	breast	breast_cancer	Recurrence-based, Literature-based
1000	CDH2	26343386	WGS-WES-Gene panel	skin	desmoplastic_melanoma	Recurrence-based, Literature-based
1007	CDH9	24120142	WES	brain	glioblastoma	InVEx, MutSig
1007	CDH9	22158541	WES	blood	chronic_lymphocytic_leukemia	Recurrence-based
1008	CDH10	14993899	Known Cancer	multiple	-	-
1008	CDH10	18772397	WES	pancreas	pancreatic_ductal_adenocarcinoma	Wood-based
1008	CDH10	26503331	WES-gene panel	lung	lung_squamous_cell_carcinoma	MutSig
1008	CDH10	22941188	WES	lung	small_cell_lung_cancer	MuSiC
1008	CDH10	21798893	WES	head_and_neck	squamous_head_and_neck_cancer	MutSig
1009	CDH11	14993899	Known Cancer	multiple	-	-
1009	CDH11	26503331	WES-gene panel	lung	lung_squamous_cell_carcinoma	MutSig
1010	CDH12	21798893	WES	head_and_neck	squamous_head_and_neck_cancer	MutSig
1012	CDH13	25855536	WES	pancreas	pancreatic_ductal_adenocarcinoma	MutSig
1015	CDH17	14993899	Known Cancer	multiple	-	-
1016	CDH18	24120142	WES	brain	glioblastoma	InVEx, MutSig
1019	CDK4	29625053	WES	multiple	pan-cancer_adult	PanSoftWare
1019	CDK4	14993899	Known Cancer	multiple	-	-
1019	CDK4	24390350	WES	multiple	pan-cancer_adult	MutSig
1019	CDK4	24705251	WGS-WES	brain	paediatric_high-grade_glioma	Recurrence-based
1021	CDK6	14993899	Known Cancer	multiple	-	-
1021	CDK6	27135926	WGS	breast	breast_cancer	Paper-specific
1021	CDK6	24705251	WGS-WES	brain	paediatric_high-grade_glioma	Recurrence-based
1026	CDKN1A	29625053	WES	multiple	pan-cancer_adult	PanSoftWare
1026	CDKN1A	24476821	WES	bladder	bladder_cancer	MutSig
1026	CDKN1A	26947078	WES	kidney	renal_cancer_(all_histologies)	MutSig, Literature-based
1026	CDKN1A	28297679	WES	hepatobiliary	cholangiocarcinoma	MutSig
1026	CDKN1A	14993899	Known Cancer	multiple	-	-
1026	CDKN1A	24132290	WES	multiple	pan-cancer_adult	MuSiC
1026	CDKN1A	24390350	WES	multiple	pan-cancer_adult	MutSig
1026	CDKN1A	28988769	WES	bladder	bladder_cancer	MutSig
1026	CDKN1A	25822088	WES	hepatobiliary	hepatocellular_carcinoma	MutSig
1026	CDKN1A	25362482	WES	hepatobiliary	hepatocellular_carcinoma	MutSig
1027	CDKN1B	29625053	WES	multiple	pan-cancer_adult	PanSoftWare
1027	CDKN1B	22610119	WES	prostate	prostate_cancer	MutSig
1027	CDKN1B	23000897	WES	breast	breast_cancer	MuSiC
1027	CDKN1B	26451490	WES	breast	breast_cancer	MutSig
1027	CDKN1B	24185511	WES	small_intestine	neuroendocrine_tumour	Wood-based
1027	CDKN1B	14993899	Known Cancer	multiple	-	-
1027	CDKN1B	24132290	WES	multiple	pan-cancer_adult	MuSiC
1027	CDKN1B	25576899	WES-gene panel	thyroid	anaplastic_thyroid_carcinoma	Recurrence-based, Literature-based
1027	CDKN1B	24390350	WES	multiple	pan-cancer_adult	MutSig
1027	CDKN1B	29489755	WGS-WES-RNAseq	multiple	pan-cancer_paediatric	GRIN, MutSig
1027	CDKN1B	27135926	WGS	breast	breast_cancer	Paper-specific
1027	CDKN1B	27161491	Gene panel	breast	breast_cancer	Recurrence-based
1027	CDKN1B	22722201	WES	breast	breast_cancer	Greenman-based
1027	CDKN1B	26544944	WGS-WES	prostate	prostate_cancer	MutSig
1027	CDKN1B	26099045	WGS	breast	breast_cancer	Recurrence-based, Literature-based
1029	CDKN2A	21798897	WES	head_and_neck	squamous_head_and_neck_cancer	Recurrence-based
1029	CDKN2A	25730765	WGS	blood	acute_lymphocytic_leukemia	Recurrence-based
1029	CDKN2A	26909576	WGS	pancreas	pancreatic_cancer_(all_histologies)	HOTNET2, OncodriveFM, MutSig
1029	CDKN2A	29625053	WES	multiple	pan-cancer_adult	PanSoftWare
1029	CDKN2A	24633157	WGS-WES-Gene panel	soft_tissue	angiosarcoma	Greenman-based
1029	CDKN2A	23103869	WES	pancreas	pancreatic_ductal_adenocarcinoma	MuSiC
1029	CDKN2A	26950094	WES-gene panel	skin	skin_basal_cell_carcinoma	MutSig, TumOnc
1029	CDKN2A	27158780	WES	lung	lung_cancer_(all_histologies)	MutSig
1029	CDKN2A	22960745	WES	lung	lung_squamous_cell_carcinoma	MutSig
1029	CDKN2A	24476821	WES	bladder	bladder_cancer	MutSig
1029	CDKN2A	25079552	WES	lung	lung_adenocarcinoma	MutSig
1029	CDKN2A	26091043	WES	skin	melanoma	InVEx, MutSig
1029	CDKN2A	25631445	WES	head_and_neck	squamous_head_and_neck_cancer	MutSig
1029	CDKN2A	28548104	WGS	esophagus	esophageal_squamous_carcinoma	MutSig
1029	CDKN2A	26192916	WGS-WES	blood	cutaneous_T_cell_lymphoma	MuSiC
1029	CDKN2A	18948947	Gene panel	lung	lung_adenocarcinoma	MuSiC
1029	CDKN2A	23525077	WGS-WES	esophagus	esophageal_adenocarcinoma	MutSig
1029	CDKN2A	28297679	WES	hepatobiliary	cholangiocarcinoma	MutSig
1029	CDKN2A	27064257	WGS	hepatobiliary	pan-liver	Paper-specific
1029	CDKN2A	14993899	Known Cancer	multiple	-	-
1029	CDKN2A	25151357	WES	esophagus	esophageal_squamous_carcinoma	MutSig
1029	CDKN2A	26804919	WES	small_intestine	ampullary_adenocarcinoma	MutSig
1029	CDKN2A	22561517	WES	hepatobiliary	hepatocellular_carcinoma	Recurrence-based
1029	CDKN2A	22817889	WES	skin	melanoma	InVEx
1029	CDKN2A	23334668	WGS-WES	blood	acute_lymphocytic_leukemia	Recurrence-based
1029	CDKN2A	26790612	WES	head_and_neck	squamous_head_and_neck_cancer	MuSiC
1029	CDKN2A	18772397	WES	pancreas	pancreatic_ductal_adenocarcinoma	Wood-based
1029	CDKN2A	20668451	Gene panel	lung	lung_cancer_(all_histologies)	Wood-based
1029	CDKN2A	24132290	WES	multiple	pan-cancer_adult	MuSiC
1029	CDKN2A	26437031	WGS-WES-Gene panel	blood	T-cell_leukemia/lymphoma	MutSig
1029	CDKN2A	26214590	WES	skin	melanoma	MutSig
1029	CDKN2A	24390350	WES	multiple	pan-cancer_adult	MutSig
1029	CDKN2A	25240281	WES	peripheral_nervous_system	malignant_peripheral_nerve_sheath_tumour	Recurrence-based
1029	CDKN2A	28027327	WES	breast	breast_cancer	MutSig
1029	CDKN2A	25501392	WES	multiple	pan-cancer_adult	HOTNET2
1029	CDKN2A	28098136	WGS-WES	head_and_neck	nasopharyngeal_carcinoma	MutSig
1029	CDKN2A	24952746	WES	head_and_neck	nasopharyngeal_carcinoma	MutSig
1029	CDKN2A	24686850	WES	esophagus	esophageal_squamous_carcinoma	MutSig
1029	CDKN2A	22327622	Gene panel	lung	non-small_cell_lung_cancer	Recurrence-based
1029	CDKN2A	29489755	WGS-WES-RNAseq	multiple	pan-cancer_paediatric	GRIN, MutSig
1029	CDKN2A	26258846	WES	hepatobiliary	biliary_tract_cancer	MutSig
1029	CDKN2A	27135926	WGS	breast	breast_cancer	Paper-specific
1029	CDKN2A	22561520	WES	hepatobiliary	cholangiocarcinoma	Recurrence-based
1029	CDKN2A	24413735	WES	blood	acute_lymphoblastic_leukemia	Greenman-based
1029	CDKN2A	27161491	Gene panel	breast	breast_cancer	Recurrence-based
1029	CDKN2A	24974848	WES	thymus	thymic_carcinoma	Recurrence-based
1029	CDKN2A	27058444	WGS-WES	esophagus	esophageal_squamous_carcinoma	MutSig
1029	CDKN2A	28988769	WES	bladder	bladder_cancer	MutSig
1029	CDKN2A	26000489	WES	prostate	prostate_cancer	MutSig
1029	CDKN2A	26154128	WES-gene panel	pancreas	pancreatic_ductal_adenocarcinoma	Recurrence-based
1029	CDKN2A	25822088	WES	hepatobiliary	hepatocellular_carcinoma	MutSig
1029	CDKN2A	26343386	WGS-WES-Gene panel	skin	desmoplastic_melanoma	Recurrence-based, Literature-based
1029	CDKN2A	22722201	WES	breast	breast_cancer	Greenman-based
1029	CDKN2A	21798893	WES	head_and_neck	squamous_head_and_neck_cancer	MutSig
1029	CDKN2A	28622513	WES	hepatobiliary	hepatocellular_carcinoma	MutSig, Recurrence-based
1029	CDKN2A	28810144	WES plus targeted deep resequencing	pancreas	pancreatic_ductal_adenocarcinoma	MutSig
1029	CDKN2A	28052061	WGS-WES	esophagus	esophageal_(squamous_and_adenocarcinoma)	MutSig
1029	CDKN2A	25223734	WGS	bone	Ewing_sarcoma	MuSiC
1029	CDKN2A	25362482	WES	hepatobiliary	hepatocellular_carcinoma	MutSig
1029	CDKN2A	23539594	Known Cancer	multiple	-	-
1029	CDKN2A	25719666	WGS	pancreas	pancreatic_ductal_adenocarcinoma	MutSig, Recurrence-based
1029	CDKN2A	22156295	WES	pancreas	pancreatic_ductal_adenocarcinoma	Recurrence-based
1029	CDKN2A	24952744	WGS	esophagus	esophageal_adenocarcinoma	Recurrence-based
1029	CDKN2A	21499247	WES	skin	melanoma	Paper-specific
1029	CDKN2A	26939876	Gene panel	breast	triple_negative_breast_cancer	Recurrence-based, Paper-specific
1029	CDKN2A	25855536	WES	pancreas	pancreatic_ductal_adenocarcinoma	MutSig
1029	CDKN2A	24705251	WGS-WES	brain	paediatric_high-grade_glioma	Recurrence-based
1029	CDKN2A	26806338	WES-gene panel	small_intestine	ampullary_adenocarcinoma	Recurrence-based
1029	CDKN2A	26099045	WGS	breast	breast_cancer	Recurrence-based, Literature-based
1030	CDKN2B	25730765	WGS	blood	acute_lymphocytic_leukemia	Recurrence-based
1030	CDKN2B	23334668	WGS-WES	blood	acute_lymphocytic_leukemia	Recurrence-based
1030	CDKN2B	27135926	WGS	breast	breast_cancer	Paper-specific
1030	CDKN2B	24413735	WES	blood	acute_lymphoblastic_leukemia	Greenman-based
1030	CDKN2B	26000489	WES	prostate	prostate_cancer	MutSig
1030	CDKN2B	25362482	WES	hepatobiliary	hepatocellular_carcinoma	MutSig
1030	CDKN2B	26939876	Gene panel	breast	triple_negative_breast_cancer	Recurrence-based, Paper-specific
1030	CDKN2B	24705251	WGS-WES	brain	paediatric_high-grade_glioma	Recurrence-based
1031	CDKN2C	29625053	WES	multiple	pan-cancer_adult	PanSoftWare
1031	CDKN2C	14993899	Known Cancer	multiple	-	-
1031	CDKN2C	24132290	WES	multiple	pan-cancer_adult	MuSiC
1031	CDKN2C	25576899	WES-gene panel	thyroid	anaplastic_thyroid_carcinoma	Recurrence-based, Literature-based
1045	CDX2	28256603	WES plus targeted deep resequencing	head_and_neck	nasopharyngeal_carcinoma	Literature-based, Paper-specific
1045	CDX2	14993899	Known Cancer	multiple	-	-
1046	CDX4	24120142	WES	brain	glioblastoma	InVEx, MutSig
1050	CEBPA	29625053	WES	multiple	pan-cancer_adult	PanSoftWare
1050	CEBPA	23634996	WGS-WES	blood	acute_myeloid_leukemia	MuSiC
1050	CEBPA	14993899	Known Cancer	multiple	-	-
1050	CEBPA	24132290	WES	multiple	pan-cancer_adult	MuSiC
1050	CEBPA	24390350	WES	multiple	pan-cancer_adult	MutSig
1050	CEBPA	29489755	WGS-WES-RNAseq	multiple	pan-cancer_paediatric	GRIN, MutSig
1050	CEBPA	27063598	WES-gene panel	blood	acute_promyelocytic_leukemia	Recurrence-based
1050	CEBPA	23539594	Known Cancer	multiple	-	-
1063	CENPF	28452984	WES	blood	chronic_myeloid_leukemia	Recurrence-based, Literature-based
1105	CHD1	26000489	WES	prostate	prostate_cancer	MutSig
1106	CHD2	14993899	Known Cancer	multiple	-	-
1106	CHD2	23415222	WES	blood	chronic_lymphocytic_leukemia	MutSig
1106	CHD2	26466571	WES	blood	chronic_lymphocytic_leukemia	MutSig
1106	CHD2	22158541	WES	blood	chronic_lymphocytic_leukemia	Recurrence-based
1106	CHD2	23583981	WGS-WES	brain	paediatric_low_grade_glioma	MuSiC, Paper-specific
1107	CHD3	29625053	WES	multiple	pan-cancer_adult	PanSoftWare
1107	CHD3	25401301	WES	kidney	non-clear_cell_renal_cancer	Wood-based
1108	CHD4	29625053	WES	multiple	pan-cancer_adult	PanSoftWare
1108	CHD4	23636398	WES	uterus	endometrial_cancer	MuSiC
1108	CHD4	28292439	WES	uterus	uterine_carcinosarcoma	MutSig
1108	CHD4	14993899	Known Cancer	multiple	-	-
1108	CHD4	27149842	WES	colorectal	colorectal_adenocarcinoma	MutSig
1108	CHD4	27348297	WES	uterus	endometrial_cancer	MutSig
1108	CHD4	24390350	WES	multiple	pan-cancer_adult	MutSig
1108	CHD4	23104009	WES	uterus	serous_endometrial_cancer	Recurrence-based
1108	CHD4	29489755	WGS-WES-RNAseq	multiple	pan-cancer_paediatric	GRIN, MutSig
1113	CHGA	21499247	WES	skin	melanoma	Paper-specific
1183	CLCN4	22156295	WES	pancreas	pancreatic_ductal_adenocarcinoma	Recurrence-based
1186	CLCN7	26824661	WGS-WES	brain	pan-glioma	MutSig
1198	CLK3	25730765	WGS	blood	acute_lymphocytic_leukemia	Recurrence-based
1213	CLTC	14993899	Known Cancer	multiple	-	-
1233	CCR4	14993899	Known Cancer	multiple	-	-
1233	CCR4	26437031	WGS-WES-Gene panel	blood	T-cell_leukemia/lymphoma	MutSig
1234	CCR5	20668451	Gene panel	lung	lung_cancer_(all_histologies)	Wood-based
1236	CCR7	14993899	Known Cancer	multiple	-	-
1236	CCR7	26437031	WGS-WES-Gene panel	blood	T-cell_leukemia/lymphoma	MutSig
1240	CMKLR1	20668451	Gene panel	lung	lung_cancer_(all_histologies)	Wood-based
1262	CNGA4	25079317	WES	stomach	gastric_adenocarcinoma	MutSig
1272	CNTN1	22484628	WES	stomach	gastric_adenocarcinoma	Recurrence-based
1277	COL1A1	14993899	Known Cancer	multiple	-	-
1277	COL1A1	29489754	WGS-WES	multiple	pan-cancer_paediatric	MuSiC
1278	COL1A2	24120142	WES	brain	glioblastoma	InVEx, MutSig
1278	COL1A2	21798893	WES	head_and_neck	squamous_head_and_neck_cancer	MutSig
1280	COL2A1	14993899	Known Cancer	multiple	-	-
1280	COL2A1	23770606	WES	bone	chondrosarcoma	Recurrence-based
1281	COL3A1	14993899	Known Cancer	multiple	-	-
1281	COL3A1	18772396	WES	brain	glioblastoma	Wood-based
1282	COL4A1	26192917	WES-gene panel	blood	natural_killer/T_cell_lymphoma	MuSiC
1284	COL4A2	22941189	WES	lung	small_cell_lung_cancer	Wood-based
1289	COL5A1	29625053	WES	multiple	pan-cancer_adult	PanSoftWare
1289	COL5A1	18772397	WES	pancreas	pancreatic_ductal_adenocarcinoma	Wood-based
1289	COL5A1	24390350	WES	multiple	pan-cancer_adult	MutSig
1289	COL5A1	28551381	WES-gene panel	colorectal	colorectal_adenocarcinoma	Recurrence-based
1293	COL6A3	26824661	WGS-WES	brain	pan-glioma	MutSig
1294	COL7A1	28452984	WES	blood	chronic_myeloid_leukemia	Recurrence-based, Literature-based
1298	COL9A2	26091043	WES	skin	melanoma	InVEx, MutSig
1301	COL11A1	23636398	WES	uterus	endometrial_cancer	MuSiC
1301	COL11A1	22941188	WES	lung	small_cell_lung_cancer	MuSiC
1301	COL11A1	25351205	WGS-WES	kidney	clear_cell_renal_cancer	MuSiC
1303	COL12A1	27687306	WES	lung	lung_adenocarcinoma	InVEx
1316	KLF6	14993899	Known Cancer	multiple	-	-
1316	KLF6	26939876	Gene panel	breast	triple_negative_breast_cancer	Recurrence-based, Paper-specific
1345	COX6C	14993899	Known Cancer	multiple	-	-
1373	CPS1	27064257	WGS	hepatobiliary	pan-liver	Paper-specific
1373	CPS1	22343534	WES	blood	diffuse_large_B-cell_lymphoma	MutSig
1385	CREB1	14993899	Known Cancer	multiple	-	-
1387	CREBBP	29625053	WES	multiple	pan-cancer_adult	PanSoftWare
1387	CREBBP	24633157	WGS-WES-Gene panel	soft_tissue	angiosarcoma	Greenman-based
1387	CREBBP	28548104	WGS	esophagus	esophageal_squamous_carcinoma	MutSig
1387	CREBBP	14993899	Known Cancer	multiple	-	-
1387	CREBBP	25151357	WES	esophagus	esophageal_squamous_carcinoma	MutSig
1387	CREBBP	26168399	WGS	lung	small_cell_lung_cancer	Paper-specific
1387	CREBBP	21822268	WES	bladder	bladder_cancer	Wood-based, Recurrence-based
1387	CREBBP	24121792	WES	bladder	bladder_cancer	Wood-based
1387	CREBBP	27126562	WES	retina	retinoblastoma	MutSig, Recurrence-based
1387	CREBBP	28064239	WES	blood	follicular_lymphoma	MuSiC
1387	CREBBP	24390350	WES	multiple	pan-cancer_adult	MutSig
1387	CREBBP	22343534	WES	blood	diffuse_large_B-cell_lymphoma	MutSig
1387	CREBBP	23143597	WES	blood	Burkitt&#39;s_lymphoma	Recurrence-based
1387	CREBBP	29489755	WGS-WES-RNAseq	multiple	pan-cancer_paediatric	GRIN, MutSig
1387	CREBBP	28412734	WGS	hepatobiliary	hepatocellular_carcinoma	Recurrence-based, Literature-based
1387	CREBBP	21796119	WES	blood	non-Hodgkin_lymphoma	Greenman-based
1387	CREBBP	27135926	WGS	breast	breast_cancer	Paper-specific
1387	CREBBP	24362818	WGS-WES	blood	follicular_lymphoma	Recurrence-based
1387	CREBBP	21390126	WES	blood	diffuse_large_B-cell_lymphoma	Recurrence-based
1387	CREBBP	21804550	WES	blood	diffuse_large_B-cell_lymphoma	Paper-specific
1387	CREBBP	25961940	WGS-WES	blood	acute_lymphoblastic_leukemia	MutSig
1387	CREBBP	28988769	WES	bladder	bladder_cancer	MutSig
1387	CREBBP	23539594	Known Cancer	multiple	-	-
1387	CREBBP	26939876	Gene panel	breast	triple_negative_breast_cancer	Recurrence-based, Paper-specific
1387	CREBBP	26625313	WES	bladder	bladder_cancer	MutSig
1436	CSF1R	14993899	Known Cancer	multiple	-	-
1436	CSF1R	23539594	Known Cancer	multiple	-	-
1441	CSF3R	14993899	Known Cancer	multiple	-	-
1441	CSF3R	29489755	WGS-WES-RNAseq	multiple	pan-cancer_paediatric	GRIN, MutSig
1442	CSH1	21499247	WES	skin	melanoma	Paper-specific
1452	CSNK1A1	26437031	WGS-WES-Gene panel	blood	T-cell_leukemia/lymphoma	MutSig
1457	CSNK2A1	26437031	WGS-WES-Gene panel	blood	T-cell_leukemia/lymphoma	MutSig
1460	CSNK2B	26437031	WGS-WES-Gene panel	blood	T-cell_leukemia/lymphoma	MutSig
1460	CSNK2B	22820256	WES	brain	medulloblastoma	MutSig
1462	VCAN	27687306	WES	lung	lung_adenocarcinoma	InVEx
1462	VCAN	26648538	WGS-Gene panel	blood	chronic_myelomonocytic_leukemia	Recurrence-based
1464	CSPG4	28452984	WES	blood	chronic_myeloid_leukemia	Recurrence-based, Literature-based
1495	CTNNA1	27161491	Gene panel	breast	breast_cancer	Recurrence-based
1496	CTNNA2	14993899	Known Cancer	multiple	-	-
1496	CTNNA2	18772397	WES	pancreas	pancreatic_ductal_adenocarcinoma	Wood-based
1496	CTNNA2	24816253	WGS	stomach	gastric_adenocarcinoma	Youn-based
1499	CTNNB1	24747642	WES	adrenal_gland	adrenocortical_carcinoma	MutSig
1499	CTNNB1	29625053	WES	multiple	pan-cancer_adult	PanSoftWare
1499	CTNNB1	20601955	Gene panel	soft_tissue	soft_tissue_sarcoma	Recurrence-based
1499	CTNNB1	22981675	Gene panel	prostate	prostate_cancer	Recurrence-based
1499	CTNNB1	24413733	WES	brain	craniopharyngioma	MutSig
1499	CTNNB1	27158780	WES	lung	lung_cancer_(all_histologies)	MutSig
1499	CTNNB1	22810696	WES	colorectal	colorectal_adenocarcinoma	MutSig
1499	CTNNB1	23636398	WES	uterus	endometrial_cancer	MuSiC
1499	CTNNB1	25079317	WES	stomach	gastric_adenocarcinoma	MutSig
1499	CTNNB1	26091043	WES	skin	melanoma	InVEx, MutSig
1499	CTNNB1	24700472	WES	adrenal_gland	adrenocortical_adenoma	MutSig, Recurrence-based
1499	CTNNB1	22634756	WGS	hepatobiliary	hepatocellular_carcinoma	Paper-specific
1499	CTNNB1	27064257	WGS	hepatobiliary	pan-liver	Paper-specific
1499	CTNNB1	14993899	Known Cancer	multiple	-	-
1499	CTNNB1	27149842	WES	colorectal	colorectal_adenocarcinoma	MutSig
1499	CTNNB1	27348297	WES	uterus	endometrial_cancer	MutSig
1499	CTNNB1	26804919	WES	small_intestine	ampullary_adenocarcinoma	MutSig
1499	CTNNB1	29489754	WGS-WES	multiple	pan-cancer_paediatric	MuSiC
1499	CTNNB1	22561517	WES	hepatobiliary	hepatocellular_carcinoma	Recurrence-based
1499	CTNNB1	22980975	WES	lung	lung_adenocarcinoma	InVEx
1499	CTNNB1	22832583	WGS-WES	brain	medulloblastoma	MutSig
1499	CTNNB1	20668451	Gene panel	ovary	ovarian_cancer	Wood-based
1499	CTNNB1	24132290	WES	multiple	pan-cancer_adult	MuSiC
1499	CTNNB1	25576899	WES-gene panel	thyroid	anaplastic_thyroid_carcinoma	Recurrence-based, Literature-based
1499	CTNNB1	24390350	WES	multiple	pan-cancer_adult	MutSig
1499	CTNNB1	21822264	WES	hepatobiliary	hepatocellular_carcinoma	Recurrence-based
1499	CTNNB1	22327622	Gene panel	lung	non-small_cell_lung_cancer	Recurrence-based
1499	CTNNB1	29489755	WGS-WES-RNAseq	multiple	pan-cancer_paediatric	GRIN, MutSig
1499	CTNNB1	21163964	WES	brain	medulloblastoma	Wood-based
1499	CTNNB1	25743702	WGS-WES	adrenal_gland	adrenocortical_carcinoma	Recurrence-based
1499	CTNNB1	22820256	WES	brain	medulloblastoma	MutSig
1499	CTNNB1	22722829	WGS	brain	medulloblastoma	MuSiC
1499	CTNNB1	26000489	WES	prostate	prostate_cancer	MutSig
1499	CTNNB1	25822088	WES	hepatobiliary	hepatocellular_carcinoma	MutSig
1499	CTNNB1	26544944	WGS-WES	prostate	prostate_cancer	MutSig
1499	CTNNB1	28622513	WES	hepatobiliary	hepatocellular_carcinoma	MutSig, Recurrence-based
1499	CTNNB1	25362482	WES	hepatobiliary	hepatocellular_carcinoma	MutSig
1499	CTNNB1	23539594	Known Cancer	multiple	-	-
1499	CTNNB1	22037554	WES	stomach	gastric_adenocarcinoma	Wood-based
1499	CTNNB1	26939876	Gene panel	breast	triple_negative_breast_cancer	Recurrence-based, Paper-specific
1499	CTNNB1	22158988	WES	pancreas	pancreatic_neoplastic_cysts	Recurrence-based
1499	CTNNB1	26806338	WES-gene panel	small_intestine	ampullary_adenocarcinoma	Recurrence-based
1499	CTNNB1	26998897	WES	small_intestine	duodenal_adenocarcinoma	MutSig
1499	CTNNB1	22484628	WES	stomach	gastric_adenocarcinoma	Recurrence-based
1499	CTNNB1	27505681	WES-gene panel	adrenal_gland	adrenocortical_carcinoma	MutSig
1500	CTNND1	29625053	WES	multiple	pan-cancer_adult	PanSoftWare
1500	CTNND1	14993899	Known Cancer	multiple	-	-
1501	CTNND2	14993899	Known Cancer	multiple	-	-
1520	CTSS	26451490	WES	breast	breast_cancer	MutSig
1523	CUX1	14993899	Known Cancer	multiple	-	-
1523	CUX1	24390350	WES	multiple	pan-cancer_adult	MutSig
1523	CUX1	26908133	WGS-WES	blood	chronic_myelomonocytic_leukemia	DrGap
1523	CUX1	27135926	WGS	breast	breast_cancer	Paper-specific
1524	CX3CR1	27325650	WES	penis	penile_squamous_cancer	IntOGen, Literature-based
1540	CYLD	29625053	WES	multiple	pan-cancer_adult	PanSoftWare
1540	CYLD	14993899	Known Cancer	multiple	-	-
1540	CYLD	28098136	WGS-WES	head_and_neck	nasopharyngeal_carcinoma	MutSig
1540	CYLD	24974848	WES	thymus	thymic_carcinoma	Recurrence-based
1540	CYLD	23539594	Known Cancer	multiple	-	-
1549	CYP2A7	22158541	WES	blood	chronic_lymphocytic_leukemia	Recurrence-based
1558	CYP2C8	14993899	Known Cancer	multiple	-	-
1559	CYP2C9	21499247	WES	skin	melanoma	Paper-specific
1571	CYP2E1	25362482	WES	hepatobiliary	hepatocellular_carcinoma	MutSig
1602	DACH1	29625053	WES	multiple	pan-cancer_adult	PanSoftWare
1602	DACH1	22980976	WGS	lung	non-small_cell_lung_cancer	MuSiC
1606	DGKA	27149842	WES	colorectal	colorectal_adenocarcinoma	MutSig
1610	DAO	27149842	WES	colorectal	colorectal_adenocarcinoma	MutSig
1616	DAXX	24747642	WES	adrenal_gland	adrenocortical_carcinoma	MutSig
1616	DAXX	22237025	WGS	blood	acute_myeloid_leukemia	Recurrence-based
1616	DAXX	14993899	Known Cancer	multiple	-	-
1616	DAXX	21252315	WES	pancreas	pancreatic_neuroendocrine_tumours	Recurrence-based
1616	DAXX	25576899	WES-gene panel	thyroid	anaplastic_thyroid_carcinoma	Recurrence-based, Literature-based
1616	DAXX	22286061	WES	brain	glioblastoma	Recurrence-based
1616	DAXX	23539594	Known Cancer	multiple	-	-
1616	DAXX	26939876	Gene panel	breast	triple_negative_breast_cancer	Recurrence-based, Paper-specific
1630	DCC	14993899	Known Cancer	multiple	-	-
1630	DCC	22842228	WES	skin	melanoma	MuSiC
1635	DCTD	26451490	WES	breast	breast_cancer	MutSig
1636	ACE	23143597	WES	blood	Burkitt&#39;s_lymphoma	Recurrence-based
1639	DCTN1	14993899	Known Cancer	multiple	-	-
1639	DCTN1	23583981	WGS-WES	brain	paediatric_low_grade_glioma	MuSiC, Paper-specific
1643	DDB2	14993899	Known Cancer	multiple	-	-
1649	DDIT3	14993899	Known Cancer	multiple	-	-
1654	DDX3X	29625053	WES	multiple	pan-cancer_adult	PanSoftWare
1654	DDX3X	26928227	WGS-WES-Gene panel	pleura	malignant_pleural_mesothelioma	MuSiC
1654	DDX3X	26091043	WES	skin	melanoma	InVEx, MutSig
1654	DDX3X	14993899	Known Cancer	multiple	-	-
1654	DDX3X	29489754	WGS-WES	multiple	pan-cancer_paediatric	MuSiC
1654	DDX3X	26192917	WES-gene panel	blood	natural_killer/T_cell_lymphoma	MuSiC
1654	DDX3X	22832583	WGS-WES	brain	medulloblastoma	MutSig
1654	DDX3X	23415222	WES	blood	chronic_lymphocytic_leukemia	MutSig
1654	DDX3X	26466571	WES	blood	chronic_lymphocytic_leukemia	MutSig
1654	DDX3X	24390350	WES	multiple	pan-cancer_adult	MutSig
1654	DDX3X	29489755	WGS-WES-RNAseq	multiple	pan-cancer_paediatric	GRIN, MutSig
1654	DDX3X	22820256	WES	brain	medulloblastoma	MutSig
1654	DDX3X	22158541	WES	blood	chronic_lymphocytic_leukemia	Recurrence-based
1654	DDX3X	23143595	WGS-WES	blood	Burkitt&#39;s_lymphoma	Recurrence-based
1654	DDX3X	22722829	WGS	brain	medulloblastoma	MuSiC
1654	DDX3X	21798893	WES	head_and_neck	squamous_head_and_neck_cancer	MutSig
1654	DDX3X	22150006	WGS-WES	blood	chronic_lymphocytic_leukemia	MutSig
1655	DDX5	26824661	WGS-WES	brain	pan-glioma	MutSig
1655	DDX5	14993899	Known Cancer	multiple	-	-
1655	DDX5	24390350	WES	multiple	pan-cancer_adult	MutSig
1656	DDX6	14993899	Known Cancer	multiple	-	-
1657	DMXL1	21822264	WES	hepatobiliary	hepatocellular_carcinoma	Recurrence-based
1660	DHX9	29625053	WES	multiple	pan-cancer_adult	PanSoftWare
1662	DDX10	25730765	WGS	blood	acute_lymphocytic_leukemia	Recurrence-based
1662	DDX10	14993899	Known Cancer	multiple	-	-
1687	GSDME	27325650	WES	penis	penile_squamous_cancer	IntOGen, Literature-based
1729	DIAPH1	27149842	WES	colorectal	colorectal_adenocarcinoma	MutSig
1729	DIAPH1	28296713	WES	skin	mucosal_melanoma	Recurrence-based
1729	DIAPH1	24390350	WES	multiple	pan-cancer_adult	MutSig
1729	DIAPH1	22343534	WES	blood	diffuse_large_B-cell_lymphoma	MutSig
1730	DIAPH2	29625053	WES	multiple	pan-cancer_adult	PanSoftWare
1741	DLG3	18772397	WES	pancreas	pancreatic_ductal_adenocarcinoma	Wood-based
1756	DMD	29625053	WES	multiple	pan-cancer_adult	PanSoftWare
1756	DMD	22895193	WES	colorectal	colorectal_adenocarcinoma	Wood-based
1756	DMD	22484628	WES	stomach	gastric_adenocarcinoma	Recurrence-based
1767	DNAH5	22895193	WES	colorectal	colorectal_adenocarcinoma	Wood-based
1770	DNAH9	28452984	WES	blood	chronic_myeloid_leukemia	Recurrence-based, Literature-based
1770	DNAH9	22156295	WES	pancreas	pancreatic_ductal_adenocarcinoma	Recurrence-based
1770	DNAH9	22817890	WGS	blood	acute_myeloid_leukemia	Recurrence-based
1780	DYNC1I1	24120142	WES	brain	glioblastoma	InVEx, MutSig
1785	DNM2	23263491	WES	blood	acute_lymphoblastic_leukemia	MuSiC
1785	DNM2	14993899	Known Cancer	multiple	-	-
1785	DNM2	29489755	WGS-WES-RNAseq	multiple	pan-cancer_paediatric	GRIN, MutSig
1785	DNM2	22237106	WGS	blood	acute_lymphoblastic_leukemia	Recurrence-based
1786	DNMT1	22976956	Gene panel	blood	acute_myeloid_leukemia	Recurrence-based
1786	DNMT1	26790612	WES	head_and_neck	squamous_head_and_neck_cancer	MuSiC
1786	DNMT1	23539594	Known Cancer	multiple	-	-
1788	DNMT3A	29625053	WES	multiple	pan-cancer_adult	PanSoftWare
1788	DNMT3A	23634996	WGS-WES	blood	acute_myeloid_leukemia	MuSiC
1788	DNMT3A	26824661	WGS-WES	brain	pan-glioma	MutSig
1788	DNMT3A	26192916	WGS-WES	blood	cutaneous_T_cell_lymphoma	MuSiC
1788	DNMT3A	22976956	Gene panel	blood	acute_myeloid_leukemia	Recurrence-based
1788	DNMT3A	14993899	Known Cancer	multiple	-	-
1788	DNMT3A	24132290	WES	multiple	pan-cancer_adult	MuSiC
1788	DNMT3A	26437031	WGS-WES-Gene panel	blood	T-cell_leukemia/lymphoma	MutSig
1788	DNMT3A	24390350	WES	multiple	pan-cancer_adult	MutSig
1788	DNMT3A	27063598	WES-gene panel	blood	acute_promyelocytic_leukemia	Recurrence-based
1788	DNMT3A	26648538	WGS-Gene panel	blood	chronic_myelomonocytic_leukemia	Recurrence-based
1788	DNMT3A	26908133	WGS-WES	blood	chronic_myelomonocytic_leukemia	DrGap
1788	DNMT3A	24325359	WES	blood	myeloproliferative_neoplasm	Paper-specific
1788	DNMT3A	27135926	WGS	breast	breast_cancer	Paper-specific
1788	DNMT3A	24413734	WES	blood	peripheral_T-cell_lymphoma	Recurrence-based
1788	DNMT3A	24413737	WES	blood	angioimmunoblastic_T-cell_lymphoma	Recurrence-based
1788	DNMT3A	27236916	WES-gene panel	thyroid	papillary_thyroid_cancer	Recurrence-based
1788	DNMT3A	26457647	WES-gene panel	blood	juvenile_myelomonocytic_leukemia	Paper-specific, Literature-based
1788	DNMT3A	23539594	Known Cancer	multiple	-	-
1788	DNMT3A	26939876	Gene panel	breast	triple_negative_breast_cancer	Recurrence-based, Paper-specific
1788	DNMT3A	22817890	WGS	blood	acute_myeloid_leukemia	Recurrence-based
1788	DNMT3A	21399634	WES	blood	acute_monocytic_leukemia	Recurrence-based
1788	DNMT3A	21909114	WES	blood	myelodysplasia	Recurrence-based
1789	DNMT3B	26939876	Gene panel	breast	triple_negative_breast_cancer	Recurrence-based, Paper-specific
1794	DOCK2	23525077	WGS-WES	esophagus	esophageal_adenocarcinoma	MutSig
1794	DOCK2	18772397	WES	pancreas	pancreatic_ductal_adenocarcinoma	Wood-based
1794	DOCK2	26908133	WGS-WES	blood	chronic_myelomonocytic_leukemia	DrGap
1804	DPP6	18772397	WES	pancreas	pancreatic_ductal_adenocarcinoma	Wood-based
1804	DPP6	25961940	WGS-WES	blood	acute_lymphoblastic_leukemia	MutSig
1804	DPP6	22158541	WES	blood	chronic_lymphocytic_leukemia	Recurrence-based
1806	DPYD	21804550	WES	blood	diffuse_large_B-cell_lymphoma	Paper-specific
1811	SLC26A3	24120142	WES	brain	glioblastoma	InVEx, MutSig
1811	SLC26A3	24390350	WES	multiple	pan-cancer_adult	MutSig
1814	DRD3	27149842	WES	colorectal	colorectal_adenocarcinoma	MutSig
1816	DRD5	24120142	WES	brain	glioblastoma	InVEx, MutSig
1823	DSC1	22197931	WES	skin	melanoma	Recurrence-based
1825	DSC3	21804550	WES	blood	diffuse_large_B-cell_lymphoma	Paper-specific
1828	DSG1	23583981	WGS-WES	brain	paediatric_low_grade_glioma	MuSiC, Paper-specific
1833	EPYC	26790612	WES	head_and_neck	squamous_head_and_neck_cancer	MuSiC
1837	DTNA	22158541	WES	blood	chronic_lymphocytic_leukemia	Recurrence-based
1844	DUSP2	22343534	WES	blood	diffuse_large_B-cell_lymphoma	MutSig
1849	DUSP7	21804550	WES	blood	diffuse_large_B-cell_lymphoma	Paper-specific
1852	DUSP9	21804550	WES	blood	diffuse_large_B-cell_lymphoma	Paper-specific
1859	DYRK1A	26466571	WES	blood	chronic_lymphocytic_leukemia	MutSig
1871	E2F3	25501392	WES	multiple	pan-cancer_adult	HOTNET2
1879	EBF1	14993899	Known Cancer	multiple	-	-
1879	EBF1	29489755	WGS-WES-RNAseq	multiple	pan-cancer_paediatric	GRIN, MutSig
1879	EBF1	24362818	WGS-WES	blood	follicular_lymphoma	Recurrence-based
1880	GPR183	26437031	WGS-WES-Gene panel	blood	T-cell_leukemia/lymphoma	MutSig
1880	GPR183	18987736	WGS	blood	acute_myeloid_leukemia	Literature-based
1894	ECT2	26258846	WES	hepatobiliary	biliary_tract_cancer	MutSig
1901	S1PR1	26437031	WGS-WES-Gene panel	blood	T-cell_leukemia/lymphoma	MutSig
1910	EDNRB	22810696	WES	colorectal	colorectal_adenocarcinoma	MutSig
1912	PHC2	22158541	WES	blood	chronic_lymphocytic_leukemia	Recurrence-based
1915	EEF1A1	29625053	WES	multiple	pan-cancer_adult	PanSoftWare
1915	EEF1A1	26824661	WGS-WES	brain	pan-glioma	MutSig
1915	EEF1A1	28622513	WES	hepatobiliary	hepatocellular_carcinoma	MutSig, Recurrence-based
1938	EEF2	29625053	WES	multiple	pan-cancer_adult	PanSoftWare
1951	CELSR3	25501392	WES	multiple	pan-cancer_adult	HOTNET2
1956	EGFR	29625053	WES	multiple	pan-cancer_adult	PanSoftWare
1956	EGFR	27158780	WES	lung	lung_cancer_(all_histologies)	MutSig
1956	EGFR	18772890	Gene panel	brain	glioblastoma	Wood-based
1956	EGFR	24120142	WES	brain	glioblastoma	InVEx, MutSig
1956	EGFR	25079552	WES	lung	lung_adenocarcinoma	MutSig
1956	EGFR	26061751	WES	brain	low_grade_glioma	MutSig
1956	EGFR	26824661	WGS-WES	brain	pan-glioma	MutSig
1956	EGFR	18948947	Gene panel	lung	lung_adenocarcinoma	MuSiC
1956	EGFR	14993899	Known Cancer	multiple	-	-
1956	EGFR	22980976	WGS	lung	non-small_cell_lung_cancer	MuSiC
1956	EGFR	22980975	WES	lung	lung_adenocarcinoma	InVEx
1956	EGFR	27687306	WES	lung	lung_adenocarcinoma	InVEx
1956	EGFR	20668451	Gene panel	lung	lung_cancer_(all_histologies)	Wood-based
1956	EGFR	24132290	WES	multiple	pan-cancer_adult	MuSiC
1956	EGFR	24390350	WES	multiple	pan-cancer_adult	MutSig
1956	EGFR	25501392	WES	multiple	pan-cancer_adult	HOTNET2
1956	EGFR	24997986	WES	hepatobiliary	gallbladder_carcinoma	MutSig
1956	EGFR	26258846	WES	hepatobiliary	biliary_tract_cancer	MutSig
1956	EGFR	27135926	WGS	breast	breast_cancer	Paper-specific
1956	EGFR	18772396	WES	brain	glioblastoma	Wood-based
1956	EGFR	26437033	WES-gene panel	breast	breast_fibroepithelial_tumours	Recurrence-based
1956	EGFR	23539594	Known Cancer	multiple	-	-
1956	EGFR	27270107	WES	brain	glioblastoma	MutComFocal
1956	EGFR	24705251	WGS-WES	brain	paediatric_high-grade_glioma	Recurrence-based
1956	EGFR	25301631	WES	lung	lung_adenocarcinoma	Literature-based
1959	EGR2	23415222	WES	blood	chronic_lymphocytic_leukemia	MutSig
1959	EGR2	26466571	WES	blood	chronic_lymphocytic_leukemia	MutSig
1959	EGR2	22158541	WES	blood	chronic_lymphocytic_leukemia	Recurrence-based
1960	EGR3	29625053	WES	multiple	pan-cancer_adult	PanSoftWare
1960	EGR3	24132290	WES	multiple	pan-cancer_adult	MuSiC
1964	EIF1AX	29625053	WES	multiple	pan-cancer_adult	PanSoftWare
1964	EIF1AX	25417114	WES	thyroid	papillary_thyroid_cancer	MutSig
1964	EIF1AX	26824661	WGS-WES	brain	pan-glioma	MutSig
1964	EIF1AX	14993899	Known Cancer	multiple	-	-
1964	EIF1AX	26683228	WGS-WES	uvea	melanoma	Recurrence-based, Literature-based
1964	EIF1AX	25576899	WES-gene panel	thyroid	anaplastic_thyroid_carcinoma	Recurrence-based, Literature-based
1964	EIF1AX	28810145	WES	uvea	melanoma	MutSig
1969	EPHA2	29625053	WES	multiple	pan-cancer_adult	PanSoftWare
1969	EPHA2	24390350	WES	multiple	pan-cancer_adult	MutSig
1973	EIF4A1	26192917	WES-gene panel	blood	natural_killer/T_cell_lymphoma	MuSiC
1974	EIF4A2	14993899	Known Cancer	multiple	-	-
1974	EIF4A2	24132290	WES	multiple	pan-cancer_adult	MuSiC
1990	CELA1	26941397	WES	thyroid	papillary_thyroid_cancer	MutSig
1993	ELAVL2	22941189	WES	lung	small_cell_lung_cancer	Wood-based
1995	ELAVL3	26790612	WES	head_and_neck	squamous_head_and_neck_cancer	MuSiC
1997	ELF1	29489755	WGS-WES-RNAseq	multiple	pan-cancer_paediatric	GRIN, MutSig
1999	ELF3	29625053	WES	multiple	pan-cancer_adult	PanSoftWare
1999	ELF3	24476821	WES	bladder	bladder_cancer	MutSig
1999	ELF3	28297679	WES	hepatobiliary	cholangiocarcinoma	MutSig
1999	ELF3	14993899	Known Cancer	multiple	-	-
1999	ELF3	27149842	WES	colorectal	colorectal_adenocarcinoma	MutSig
1999	ELF3	26804919	WES	small_intestine	ampullary_adenocarcinoma	MutSig
1999	ELF3	24121792	WES	bladder	bladder_cancer	Wood-based
1999	ELF3	24132290	WES	multiple	pan-cancer_adult	MuSiC
1999	ELF3	24390350	WES	multiple	pan-cancer_adult	MutSig
1999	ELF3	25501392	WES	multiple	pan-cancer_adult	HOTNET2
1999	ELF3	26258846	WES	hepatobiliary	biliary_tract_cancer	MutSig
1999	ELF3	24390348	WES	cervix	cervical_cancer_(all_histologies)	MutSig
1999	ELF3	28988769	WES	bladder	bladder_cancer	MutSig
1999	ELF3	24816253	WGS	stomach	gastric_adenocarcinoma	Youn-based
1999	ELF3	26806338	WES-gene panel	small_intestine	ampullary_adenocarcinoma	Recurrence-based
2000	ELF4	14993899	Known Cancer	multiple	-	-
2000	ELF4	26466571	WES	blood	chronic_lymphocytic_leukemia	MutSig
2000	ELF4	25501392	WES	multiple	pan-cancer_adult	HOTNET2
2005	ELK4	14993899	Known Cancer	multiple	-	-
2006	ELN	14993899	Known Cancer	multiple	-	-
2006	ELN	18772397	WES	pancreas	pancreatic_ductal_adenocarcinoma	Wood-based
2011	MARK2	26909576	WGS	pancreas	pancreatic_cancer_(all_histologies)	HOTNET2, OncodriveFM, MutSig
2011	MARK2	27149842	WES	colorectal	colorectal_adenocarcinoma	MutSig
2033	EP300	29625053	WES	multiple	pan-cancer_adult	PanSoftWare
2033	EP300	24476821	WES	bladder	bladder_cancer	MutSig
2033	EP300	28548104	WGS	esophagus	esophageal_squamous_carcinoma	MutSig
2033	EP300	14993899	Known Cancer	multiple	-	-
2033	EP300	25151357	WES	esophagus	esophageal_squamous_carcinoma	MutSig
2033	EP300	26168399	WGS	lung	small_cell_lung_cancer	Paper-specific
2033	EP300	21822268	WES	bladder	bladder_cancer	Wood-based, Recurrence-based
2033	EP300	24121792	WES	bladder	bladder_cancer	Wood-based
2033	EP300	26192917	WES-gene panel	blood	natural_killer/T_cell_lymphoma	MuSiC
2033	EP300	18772397	WES	pancreas	pancreatic_ductal_adenocarcinoma	Wood-based
2033	EP300	24132290	WES	multiple	pan-cancer_adult	MuSiC
2033	EP300	26437031	WGS-WES-Gene panel	blood	T-cell_leukemia/lymphoma	MutSig
2033	EP300	28064239	WES	blood	follicular_lymphoma	MuSiC
2033	EP300	24390350	WES	multiple	pan-cancer_adult	MutSig
2033	EP300	28098136	WGS-WES	head_and_neck	nasopharyngeal_carcinoma	MutSig
2033	EP300	24686850	WES	esophagus	esophageal_squamous_carcinoma	MutSig
2033	EP300	29489755	WGS-WES-RNAseq	multiple	pan-cancer_paediatric	GRIN, MutSig
2033	EP300	21390126	WES	blood	diffuse_large_B-cell_lymphoma	Recurrence-based
2033	EP300	21804550	WES	blood	diffuse_large_B-cell_lymphoma	Paper-specific
2033	EP300	28988769	WES	bladder	bladder_cancer	MutSig
2033	EP300	28112728	WGS	cervix	cervical_cancer_(all_histologies)	MutSig
2033	EP300	23539594	Known Cancer	multiple	-	-
2033	EP300	26939876	Gene panel	breast	triple_negative_breast_cancer	Recurrence-based, Paper-specific
2033	EP300	26625313	WES	bladder	bladder_cancer	MutSig
2033	EP300	26099045	WGS	breast	breast_cancer	Recurrence-based, Literature-based
2033	EP300	22237106	WGS	blood	acute_lymphoblastic_leukemia	Recurrence-based
2033	EP300	23583981	WGS-WES	brain	paediatric_low_grade_glioma	MuSiC, Paper-specific
2034	EPAS1	29625053	WES	multiple	pan-cancer_adult	PanSoftWare
2034	EPAS1	28162975	WES	adrenal_gland	pheochromocytoma,_paraganglioma	MutSig
2034	EPAS1	14993899	Known Cancer	multiple	-	-
2041	EPHA1	20601955	Gene panel	soft_tissue	soft_tissue_sarcoma	Recurrence-based
2042	EPHA3	29625053	WES	multiple	pan-cancer_adult	PanSoftWare
2042	EPHA3	26824661	WGS-WES	brain	pan-glioma	MutSig
2042	EPHA3	18948947	Gene panel	lung	lung_adenocarcinoma	MuSiC
2042	EPHA3	14993899	Known Cancer	multiple	-	-
2042	EPHA3	22980976	WGS	lung	non-small_cell_lung_cancer	MuSiC
2042	EPHA3	24132290	WES	multiple	pan-cancer_adult	MuSiC
2042	EPHA3	25501392	WES	multiple	pan-cancer_adult	HOTNET2
2042	EPHA3	26806338	WES-gene panel	small_intestine	ampullary_adenocarcinoma	Recurrence-based
2043	EPHA4	24755198	WES-gene panel	skin	melanoma	Recurrence-based
2044	EPHA5	20601955	Gene panel	soft_tissue	soft_tissue_sarcoma	Recurrence-based
2044	EPHA5	18948947	Gene panel	lung	lung_adenocarcinoma	MuSiC
2044	EPHA5	24908143	Gene panel	soft_tissue	soft_tissue_sarcoma	Recurrence-based
2044	EPHA5	20668451	Gene panel	lung	lung_cancer_(all_histologies)	Wood-based
2045	EPHA7	21798897	WES	head_and_neck	squamous_head_and_neck_cancer	Recurrence-based
2045	EPHA7	22610119	WES	prostate	prostate_cancer	MutSig
2045	EPHA7	20601955	Gene panel	soft_tissue	soft_tissue_sarcoma	Recurrence-based
2045	EPHA7	14993899	Known Cancer	multiple	-	-
2045	EPHA7	26939876	Gene panel	breast	triple_negative_breast_cancer	Recurrence-based, Paper-specific
2045	EPHA7	24755198	WES-gene panel	skin	melanoma	Recurrence-based
2047	EPHB1	22158541	WES	blood	chronic_lymphocytic_leukemia	Recurrence-based
2047	EPHB1	26939876	Gene panel	breast	triple_negative_breast_cancer	Recurrence-based, Paper-specific
2050	EPHB4	20399149	Gene panel	brain	glioblastoma	Paper-specific
2051	EPHB6	24132290	WES	multiple	pan-cancer_adult	MuSiC
2054	STX2	24390350	WES	multiple	pan-cancer_adult	MutSig
2058	EPRS	27687306	WES	lung	lung_adenocarcinoma	InVEx
2060	EPS15	14993899	Known Cancer	multiple	-	-
2064	ERBB2	29625053	WES	multiple	pan-cancer_adult	PanSoftWare
2064	ERBB2	26950094	WES-gene panel	skin	skin_basal_cell_carcinoma	MutSig, TumOnc
2064	ERBB2	27158780	WES	lung	lung_cancer_(all_histologies)	MutSig
2064	ERBB2	18772890	Gene panel	brain	glioblastoma	Wood-based
2064	ERBB2	25079317	WES	stomach	gastric_adenocarcinoma	MutSig
2064	ERBB2	26451490	WES	breast	breast_cancer	MutSig
2064	ERBB2	28297679	WES	hepatobiliary	cholangiocarcinoma	MutSig
2064	ERBB2	14993899	Known Cancer	multiple	-	-
2064	ERBB2	27348297	WES	uterus	endometrial_cancer	MutSig
2064	ERBB2	24121792	WES	bladder	bladder_cancer	Wood-based
2064	ERBB2	28296713	WES	skin	mucosal_melanoma	Recurrence-based
2064	ERBB2	25576899	WES-gene panel	thyroid	anaplastic_thyroid_carcinoma	Recurrence-based, Literature-based
2064	ERBB2	24390350	WES	multiple	pan-cancer_adult	MutSig
2064	ERBB2	25501392	WES	multiple	pan-cancer_adult	HOTNET2
2064	ERBB2	24997986	WES	hepatobiliary	gallbladder_carcinoma	MutSig
2064	ERBB2	24952746	WES	head_and_neck	nasopharyngeal_carcinoma	MutSig
2064	ERBB2	27135926	WGS	breast	breast_cancer	Paper-specific
2064	ERBB2	27161491	Gene panel	breast	breast_cancer	Recurrence-based
2064	ERBB2	28988769	WES	bladder	bladder_cancer	MutSig
2064	ERBB2	26343386	WGS-WES-Gene panel	skin	desmoplastic_melanoma	Recurrence-based, Literature-based
2064	ERBB2	22722201	WES	breast	breast_cancer	Greenman-based
2064	ERBB2	28052061	WGS-WES	esophagus	esophageal_(squamous_and_adenocarcinoma)	MutSig
2064	ERBB2	23539594	Known Cancer	multiple	-	-
2064	ERBB2	26806338	WES-gene panel	small_intestine	ampullary_adenocarcinoma	Recurrence-based
2064	ERBB2	26099045	WGS	breast	breast_cancer	Recurrence-based, Literature-based
2065	ERBB3	29625053	WES	multiple	pan-cancer_adult	PanSoftWare
2065	ERBB3	24476821	WES	bladder	bladder_cancer	MutSig
2065	ERBB3	28522256	WES	stomach	diffuse_gastric_adenocarcinoma	MutSig
2065	ERBB3	14993899	Known Cancer	multiple	-	-
2065	ERBB3	27348297	WES	uterus	endometrial_cancer	MutSig
2065	ERBB3	26804919	WES	small_intestine	ampullary_adenocarcinoma	MutSig
2065	ERBB3	21822268	WES	bladder	bladder_cancer	Wood-based, Recurrence-based
2065	ERBB3	24121792	WES	bladder	bladder_cancer	Wood-based
2065	ERBB3	20668451	Gene panel	breast	breast_cancer	Wood-based
2065	ERBB3	24390350	WES	multiple	pan-cancer_adult	MutSig
2065	ERBB3	24997986	WES	hepatobiliary	gallbladder_carcinoma	MutSig
2065	ERBB3	24952746	WES	head_and_neck	nasopharyngeal_carcinoma	MutSig
2065	ERBB3	22327622	Gene panel	colorectal	colorectal_adenocarcinoma	Recurrence-based
2065	ERBB3	27135926	WGS	breast	breast_cancer	Paper-specific
2065	ERBB3	28988769	WES	bladder	bladder_cancer	MutSig
2065	ERBB3	28112728	WGS	cervix	cervical_cancer_(all_histologies)	MutSig
2065	ERBB3	26939876	Gene panel	breast	triple_negative_breast_cancer	Recurrence-based, Paper-specific
2065	ERBB3	26625313	WES	bladder	bladder_cancer	MutSig
2065	ERBB3	26806338	WES-gene panel	small_intestine	ampullary_adenocarcinoma	Recurrence-based
2066	ERBB4	29625053	WES	multiple	pan-cancer_adult	PanSoftWare
2066	ERBB4	20601955	Gene panel	soft_tissue	soft_tissue_sarcoma	Recurrence-based
2066	ERBB4	18948947	Gene panel	lung	lung_adenocarcinoma	MuSiC
2066	ERBB4	14993899	Known Cancer	multiple	-	-
2066	ERBB4	20668451	Gene panel	lung	lung_cancer_(all_histologies)	Wood-based
2066	ERBB4	24132290	WES	multiple	pan-cancer_adult	MuSiC
2066	ERBB4	25501392	WES	multiple	pan-cancer_adult	HOTNET2
2066	ERBB4	24997986	WES	hepatobiliary	gallbladder_carcinoma	MutSig
2066	ERBB4	26437033	WES-gene panel	breast	breast_fibroepithelial_tumours	Recurrence-based
2066	ERBB4	26939876	Gene panel	breast	triple_negative_breast_cancer	Recurrence-based, Paper-specific
2066	ERBB4	24755198	WES-gene panel	skin	melanoma	Recurrence-based
2068	ERCC2	29625053	WES	multiple	pan-cancer_adult	PanSoftWare
2068	ERCC2	24121791	WES	bladder	bladder_cancer	Recurrence-based
2068	ERCC2	24476821	WES	bladder	bladder_cancer	MutSig
2068	ERCC2	25401301	WES	kidney	non-clear_cell_renal_cancer	Wood-based
2068	ERCC2	14993899	Known Cancer	multiple	-	-
2068	ERCC2	24121792	WES	bladder	bladder_cancer	Wood-based
2068	ERCC2	24132290	WES	multiple	pan-cancer_adult	MuSiC
2068	ERCC2	24390350	WES	multiple	pan-cancer_adult	MutSig
2068	ERCC2	28988769	WES	bladder	bladder_cancer	MutSig
2070	EYA4	25079317	WES	stomach	gastric_adenocarcinoma	MutSig
2071	ERCC3	14993899	Known Cancer	multiple	-	-
2072	ERCC4	14993899	Known Cancer	multiple	-	-
2072	ERCC4	27135926	WGS	breast	breast_cancer	Paper-specific
2077	ERF	26000489	WES	prostate	prostate_cancer	MutSig
2078	ERG	22981675	Gene panel	prostate	prostate_cancer	Recurrence-based
2078	ERG	28256603	WES plus targeted deep resequencing	head_and_neck	nasopharyngeal_carcinoma	Literature-based, Paper-specific
2078	ERG	27087322	WGS	prostate	prostate_cancer	Recurrence-based
2078	ERG	14993899	Known Cancer	multiple	-	-
2078	ERG	29489755	WGS-WES-RNAseq	multiple	pan-cancer_paediatric	GRIN, MutSig
2078	ERG	26939876	Gene panel	breast	triple_negative_breast_cancer	Recurrence-based, Paper-specific
2099	ESR1	29625053	WES	multiple	pan-cancer_adult	PanSoftWare
2099	ESR1	23636398	WES	uterus	endometrial_cancer	MuSiC
2099	ESR1	14993899	Known Cancer	multiple	-	-
2099	ESR1	27348297	WES	uterus	endometrial_cancer	MutSig
2099	ESR1	28027327	WES	breast	breast_cancer	MutSig
2099	ESR1	27135926	WGS	breast	breast_cancer	Paper-specific
2099	ESR1	24185510	WES	breast	breast_cancer	Recurrence-based
2099	ESR1	24185512	WES	breast	breast_cancer	Recurrence-based
2104	ESRRG	27064257	WGS	hepatobiliary	pan-liver	Paper-specific
2113	ETS1	21796119	WES	blood	non-Hodgkin_lymphoma	Greenman-based
2115	ETV1	14993899	Known Cancer	multiple	-	-
2118	ETV4	14993899	Known Cancer	multiple	-	-
2119	ETV5	14993899	Known Cancer	multiple	-	-
2120	ETV6	14993899	Known Cancer	multiple	-	-
2120	ETV6	22343534	WES	blood	diffuse_large_B-cell_lymphoma	MutSig
2120	ETV6	29489755	WGS-WES-RNAseq	multiple	pan-cancer_paediatric	GRIN, MutSig
2120	ETV6	27063598	WES-gene panel	blood	acute_promyelocytic_leukemia	Recurrence-based
2120	ETV6	24413735	WES	blood	acute_lymphoblastic_leukemia	Greenman-based
2120	ETV6	26939876	Gene panel	breast	triple_negative_breast_cancer	Recurrence-based, Paper-specific
2120	ETV6	22237106	WGS	blood	acute_lymphoblastic_leukemia	Recurrence-based
2122	MECOM	29625053	WES	multiple	pan-cancer_adult	PanSoftWare
2122	MECOM	23636398	WES	uterus	endometrial_cancer	MuSiC
2122	MECOM	14993899	Known Cancer	multiple	-	-
2122	MECOM	27348297	WES	uterus	endometrial_cancer	MutSig
2122	MECOM	24132290	WES	multiple	pan-cancer_adult	MuSiC
2125	EVPL	18772397	WES	pancreas	pancreatic_ductal_adenocarcinoma	Wood-based
2130	EWSR1	14993899	Known Cancer	multiple	-	-
2130	EWSR1	26466571	WES	blood	chronic_lymphocytic_leukemia	MutSig
2131	EXT1	14993899	Known Cancer	multiple	-	-
2132	EXT2	14993899	Known Cancer	multiple	-	-
2132	EXT2	20668451	Gene panel	breast	breast_cancer	Wood-based
2145	EZH1	24390350	WES	multiple	pan-cancer_adult	MutSig
2146	EZH2	29625053	WES	multiple	pan-cancer_adult	PanSoftWare
2146	EZH2	23634996	WGS-WES	blood	acute_myeloid_leukemia	MuSiC
2146	EZH2	22976956	Gene panel	blood	acute_myeloid_leukemia	Recurrence-based
2146	EZH2	14993899	Known Cancer	multiple	-	-
2146	EZH2	24132290	WES	multiple	pan-cancer_adult	MuSiC
2146	EZH2	28064239	WES	blood	follicular_lymphoma	MuSiC
2146	EZH2	24390350	WES	multiple	pan-cancer_adult	MutSig
2146	EZH2	22343534	WES	blood	diffuse_large_B-cell_lymphoma	MutSig
2146	EZH2	29489755	WGS-WES-RNAseq	multiple	pan-cancer_paediatric	GRIN, MutSig
2146	EZH2	26648538	WGS-Gene panel	blood	chronic_myelomonocytic_leukemia	Recurrence-based
2146	EZH2	26908133	WGS-WES	blood	chronic_myelomonocytic_leukemia	DrGap
2146	EZH2	21796119	WES	blood	non-Hodgkin_lymphoma	Greenman-based
2146	EZH2	24325359	WES	blood	myeloproliferative_neoplasm	Paper-specific
2146	EZH2	24362818	WGS-WES	blood	follicular_lymphoma	Recurrence-based
2146	EZH2	21804550	WES	blood	diffuse_large_B-cell_lymphoma	Paper-specific
2146	EZH2	23222956	WES	blood	chronic_myeloid_leukemia	Recurrence-based
2146	EZH2	26343386	WGS-WES-Gene panel	skin	desmoplastic_melanoma	Recurrence-based, Literature-based
2146	EZH2	26457647	WES-gene panel	blood	juvenile_myelomonocytic_leukemia	Paper-specific, Literature-based
2146	EZH2	25223734	WGS	bone	Ewing_sarcoma	MuSiC
2146	EZH2	23539594	Known Cancer	multiple	-	-
2146	EZH2	21909114	WES	blood	myelodysplasia	Recurrence-based
2146	EZH2	22237106	WGS	blood	acute_lymphoblastic_leukemia	Recurrence-based
2153	F5	26824661	WGS-WES	brain	pan-glioma	MutSig
2153	F5	23525077	WGS-WES	esophagus	esophageal_adenocarcinoma	MutSig
2157	F8	18772397	WES	pancreas	pancreatic_ductal_adenocarcinoma	Wood-based
2175	FANCA	24121791	WES	bladder	bladder_cancer	Recurrence-based
2175	FANCA	14993899	Known Cancer	multiple	-	-
2175	FANCA	26632267	WES-gene panel	bone	osteosarcoma	Recurrence-based, IntOGen
2175	FANCA	27063598	WES-gene panel	blood	acute_promyelocytic_leukemia	Recurrence-based
2176	FANCC	14993899	Known Cancer	multiple	-	-
2177	FANCD2	14993899	Known Cancer	multiple	-	-
2178	FANCE	14993899	Known Cancer	multiple	-	-
2181	ACSL3	14993899	Known Cancer	multiple	-	-
2185	PTK2B	20601955	Gene panel	soft_tissue	soft_tissue_sarcoma	Recurrence-based
2186	BPTF	24121791	WES	bladder	bladder_cancer	Recurrence-based
2186	BPTF	22634756	WGS	hepatobiliary	hepatocellular_carcinoma	Paper-specific
2188	FANCF	14993899	Known Cancer	multiple	-	-
2189	FANCG	14993899	Known Cancer	multiple	-	-
2195	FAT1	26934577	WES	head_and_neck	oral_squamous_cell_carcinoma	OncodriveFM, Youn-based
2195	FAT1	29625053	WES	multiple	pan-cancer_adult	PanSoftWare
2195	FAT1	27158780	WES	lung	lung_cancer_(all_histologies)	MutSig
2195	FAT1	25631445	WES	head_and_neck	squamous_head_and_neck_cancer	MutSig
2195	FAT1	28548104	WGS	esophagus	esophageal_squamous_carcinoma	MutSig
2195	FAT1	27325650	WES	penis	penile_squamous_cancer	IntOGen, Literature-based
2195	FAT1	14993899	Known Cancer	multiple	-	-
2195	FAT1	25151357	WES	esophagus	esophageal_squamous_carcinoma	MutSig
2195	FAT1	24390350	WES	multiple	pan-cancer_adult	MutSig
2195	FAT1	24686850	WES	esophagus	esophageal_squamous_carcinoma	MutSig
2195	FAT1	24952746	WES	head_and_neck	nasopharyngeal_carcinoma	MutSig
2195	FAT1	26608593	WES	blood	diffuse_large_B-cell_lymphoma	MuSiC
2195	FAT1	27058444	WGS-WES	esophagus	esophageal_squamous_carcinoma	MutSig
2195	FAT1	28988769	WES	bladder	bladder_cancer	MutSig
2195	FAT1	27313181	WES	stomach	mucinous_gastric_cancer	Recurrence-based
2195	FAT1	21798893	WES	head_and_neck	squamous_head_and_neck_cancer	MutSig
2195	FAT1	26536169	WES	kidney	papillary_renal_cell_carcinoma	MutSig
2195	FAT1	28551381	WES-gene panel	colorectal	colorectal_adenocarcinoma	Recurrence-based
2196	FAT2	29489754	WGS-WES	multiple	pan-cancer_paediatric	MuSiC
2196	FAT2	24686850	WES	esophagus	esophageal_squamous_carcinoma	MutSig
2196	FAT2	24952746	WES	head_and_neck	nasopharyngeal_carcinoma	MutSig
2196	FAT2	21796119	WES	blood	non-Hodgkin_lymphoma	Greenman-based
2196	FAT2	27058444	WGS-WES	esophagus	esophageal_squamous_carcinoma	MutSig
2196	FAT2	22156295	WES	pancreas	pancreatic_ductal_adenocarcinoma	Recurrence-based
2199	FBLN2	26909576	WGS	pancreas	pancreatic_cancer_(all_histologies)	HOTNET2, OncodriveFM, MutSig
2199	FBLN2	14993899	Known Cancer	multiple	-	-
2201	FBN2	29489754	WGS-WES	multiple	pan-cancer_paediatric	MuSiC
2205	FCER1A	21499247	WES	skin	melanoma	Paper-specific
2213	FCGR2B	14993899	Known Cancer	multiple	-	-
2237	FEN1	28256603	WES plus targeted deep resequencing	head_and_neck	nasopharyngeal_carcinoma	Literature-based, Paper-specific
2237	FEN1	14993899	Known Cancer	multiple	-	-
2242	FES	14993899	Known Cancer	multiple	-	-
2243	FGA	24120142	WES	brain	glioblastoma	InVEx, MutSig
2247	FGF2	28452984	WES	blood	chronic_myeloid_leukemia	Recurrence-based, Literature-based
2250	FGF5	25730765	WGS	blood	acute_lymphocytic_leukemia	Recurrence-based
2260	FGFR1	29625053	WES	multiple	pan-cancer_adult	PanSoftWare
2260	FGFR1	26121087	WGS	brain	neuroblastoma	Paper-specific
2260	FGFR1	24705250	WES	brain	astrocytoma	Recurrence-based
2260	FGFR1	14993899	Known Cancer	multiple	-	-
2260	FGFR1	29489754	WGS-WES	multiple	pan-cancer_paediatric	MuSiC
2260	FGFR1	23817572	WGS	brain	astrocytoma	MuSiC
2260	FGFR1	26258846	WES	hepatobiliary	biliary_tract_cancer	MutSig
2260	FGFR1	26939876	Gene panel	breast	triple_negative_breast_cancer	Recurrence-based, Paper-specific
2260	FGFR1	23583981	WGS-WES	brain	paediatric_low_grade_glioma	MuSiC, Paper-specific
2260	FGFR1	24880341	WES	brain	glioma	Recurrence-based
2261	FGFR3	29625053	WES	multiple	pan-cancer_adult	PanSoftWare
2261	FGFR3	26950094	WES-gene panel	skin	skin_basal_cell_carcinoma	MutSig, TumOnc
2261	FGFR3	24476821	WES	bladder	bladder_cancer	MutSig
2261	FGFR3	14993899	Known Cancer	multiple	-	-
2261	FGFR3	21822268	WES	bladder	bladder_cancer	Wood-based, Recurrence-based
2261	FGFR3	24121792	WES	bladder	bladder_cancer	Wood-based
2261	FGFR3	22980975	WES	lung	lung_adenocarcinoma	InVEx
2261	FGFR3	24132290	WES	multiple	pan-cancer_adult	MuSiC
2261	FGFR3	24390350	WES	multiple	pan-cancer_adult	MutSig
2261	FGFR3	26258846	WES	hepatobiliary	biliary_tract_cancer	MutSig
2261	FGFR3	28988769	WES	bladder	bladder_cancer	MutSig
2261	FGFR3	23539594	Known Cancer	multiple	-	-
2261	FGFR3	26625313	WES	bladder	bladder_cancer	MutSig
2261	FGFR3	23583981	WGS-WES	brain	paediatric_low_grade_glioma	MuSiC, Paper-specific
2262	GPC5	24476821	WES	bladder	bladder_cancer	MutSig
2262	GPC5	14993899	Known Cancer	multiple	-	-
2263	FGFR2	29625053	WES	multiple	pan-cancer_adult	PanSoftWare
2263	FGFR2	28297679	WES	hepatobiliary	cholangiocarcinoma	MutSig
2263	FGFR2	14993899	Known Cancer	multiple	-	-
2263	FGFR2	27348297	WES	uterus	endometrial_cancer	MutSig
2263	FGFR2	24185509	WES	hepatobiliary	cholangiocarcinoma	Wood-based
2263	FGFR2	24132290	WES	multiple	pan-cancer_adult	MuSiC
2263	FGFR2	24390350	WES	multiple	pan-cancer_adult	MutSig
2263	FGFR2	24952746	WES	head_and_neck	nasopharyngeal_carcinoma	MutSig
2263	FGFR2	26258846	WES	hepatobiliary	biliary_tract_cancer	MutSig
2263	FGFR2	27135926	WGS	breast	breast_cancer	Paper-specific
2263	FGFR2	22158541	WES	blood	chronic_lymphocytic_leukemia	Recurrence-based
2263	FGFR2	24859340	WGS	head_and_neck	ameloblastoma	Recurrence-based
2263	FGFR2	23539594	Known Cancer	multiple	-	-
2263	FGFR2	23583981	WGS-WES	brain	paediatric_low_grade_glioma	MuSiC, Paper-specific
2264	FGFR4	20399149	Gene panel	brain	glioblastoma	Paper-specific
2264	FGFR4	18948947	Gene panel	lung	lung_adenocarcinoma	MuSiC
2264	FGFR4	14993899	Known Cancer	multiple	-	-
2271	FH	14993899	Known Cancer	multiple	-	-
2271	FH	23738515	WGS	uterus	leiomyoma	Recurrence-based
2271	FH	26939876	Gene panel	breast	triple_negative_breast_cancer	Recurrence-based, Paper-specific
2272	FHIT	14993899	Known Cancer	multiple	-	-
2304	FOXE1	22941188	WES	lung	small_cell_lung_cancer	MuSiC
2305	FOXM1	25501392	WES	multiple	pan-cancer_adult	HOTNET2
2308	FOXO1	14993899	Known Cancer	multiple	-	-
2308	FOXO1	21796119	WES	blood	non-Hodgkin_lymphoma	Greenman-based
2309	FOXO3	14993899	Known Cancer	multiple	-	-
2309	FOXO3	27161491	Gene panel	breast	breast_cancer	Recurrence-based
2312	FLG	29489754	WGS-WES	multiple	pan-cancer_paediatric	MuSiC
2312	FLG	24390350	WES	multiple	pan-cancer_adult	MutSig
2312	FLG	27058444	WGS-WES	esophagus	esophageal_squamous_carcinoma	MutSig
2312	FLG	25855536	WES	pancreas	pancreatic_ductal_adenocarcinoma	MutSig
2313	FLI1	14993899	Known Cancer	multiple	-	-
2316	FLNA	29625053	WES	multiple	pan-cancer_adult	PanSoftWare
2316	FLNA	14993899	Known Cancer	multiple	-	-
2316	FLNA	26437033	WES-gene panel	breast	breast_fibroepithelial_tumours	Recurrence-based
2321	FLT1	23583981	WGS-WES	brain	paediatric_low_grade_glioma	MuSiC, Paper-specific
2322	FLT3	25730765	WGS	blood	acute_lymphocytic_leukemia	Recurrence-based
2322	FLT3	29625053	WES	multiple	pan-cancer_adult	PanSoftWare
2322	FLT3	23634996	WGS-WES	blood	acute_myeloid_leukemia	MuSiC
2322	FLT3	14993899	Known Cancer	multiple	-	-
2322	FLT3	29489754	WGS-WES	multiple	pan-cancer_paediatric	MuSiC
2322	FLT3	23334668	WGS-WES	blood	acute_lymphocytic_leukemia	Recurrence-based
2322	FLT3	20668451	Gene panel	lung	lung_cancer_(all_histologies)	Wood-based
2322	FLT3	24132290	WES	multiple	pan-cancer_adult	MuSiC
2322	FLT3	24390350	WES	multiple	pan-cancer_adult	MutSig
2322	FLT3	18987736	WGS	blood	acute_myeloid_leukemia	Literature-based
2322	FLT3	29489755	WGS-WES-RNAseq	multiple	pan-cancer_paediatric	GRIN, MutSig
2322	FLT3	27063598	WES-gene panel	blood	acute_promyelocytic_leukemia	Recurrence-based
2322	FLT3	25961940	WGS-WES	blood	acute_lymphoblastic_leukemia	MutSig
2322	FLT3	23539594	Known Cancer	multiple	-	-
2322	FLT3	22817890	WGS	blood	acute_myeloid_leukemia	Recurrence-based
2322	FLT3	22237106	WGS	blood	acute_lymphoblastic_leukemia	Recurrence-based
2324	FLT4	14993899	Known Cancer	multiple	-	-
2324	FLT4	24908143	Gene panel	soft_tissue	soft_tissue_sarcoma	Recurrence-based
2332	FMR1	29489754	WGS-WES	multiple	pan-cancer_paediatric	MuSiC
2334	AFF2	23000897	WES	breast	breast_cancer	MuSiC
2346	FOLH1	27687306	WES	lung	lung_adenocarcinoma	InVEx
2357	FPR1	26168399	WGS	lung	small_cell_lung_cancer	Paper-specific
2475	MTOR	29625053	WES	multiple	pan-cancer_adult	PanSoftWare
2475	MTOR	23792563	WES	kidney	clear_cell_renal_cancer	MutSig
2475	MTOR	26947078	WES	kidney	renal_cancer_(all_histologies)	MutSig, Literature-based
2475	MTOR	14993899	Known Cancer	multiple	-	-
2475	MTOR	22397650	WES	kidney	clear_cell_renal_cancer	Literature-based
2475	MTOR	24487277	WES	kidney	clear_cell_renal_cancer	Literature-based
2475	MTOR	24132290	WES	multiple	pan-cancer_adult	MuSiC
2475	MTOR	25576899	WES-gene panel	thyroid	anaplastic_thyroid_carcinoma	Recurrence-based, Literature-based
2475	MTOR	24390350	WES	multiple	pan-cancer_adult	MutSig
2475	MTOR	23619167	WES	head_and_neck	squamous_head_and_neck_cancer	Paper-specific
2475	MTOR	28352668	WES-gene panel	parathyroid_gland	parathyroid_carcinoma	Recurrence-based, Literature-based
2475	MTOR	27313181	WES	stomach	mucinous_gastric_cancer	Recurrence-based
2475	MTOR	25351205	WGS-WES	kidney	clear_cell_renal_cancer	MuSiC
2475	MTOR	24896186	WES	brain	intracranial_germ_cell	Recurrence-based
2515	ADAM2	22158541	WES	blood	chronic_lymphocytic_leukemia	Recurrence-based
2521	FUS	14993899	Known Cancer	multiple	-	-
2531	KDSR	14993899	Known Cancer	multiple	-	-
2534	FYN	26437031	WGS-WES-Gene panel	blood	T-cell_leukemia/lymphoma	MutSig
2534	FYN	24413734	WES	blood	peripheral_T-cell_lymphoma	Recurrence-based
2538	G6PC	27064257	WGS	hepatobiliary	pan-liver	Paper-specific
2538	G6PC	25362482	WES	hepatobiliary	hepatocellular_carcinoma	MutSig
2554	GABRA1	24120142	WES	brain	glioblastoma	InVEx, MutSig
2554	GABRA1	22343534	WES	blood	diffuse_large_B-cell_lymphoma	MutSig
2559	GABRA6	29625053	WES	multiple	pan-cancer_adult	PanSoftWare
2559	GABRA6	21720365	WES	ovary	ovarian_cancer	MutSig, MuSiC
2559	GABRA6	24120142	WES	brain	glioblastoma	InVEx, MutSig
2559	GABRA6	26824661	WGS-WES	brain	pan-glioma	MutSig
2561	GABRB2	24120142	WES	brain	glioblastoma	InVEx, MutSig
2561	GABRB2	27009842	WES	peripheral_nervous_system	neuroblastoma	Paper-specific
2561	GABRB2	22797305	WES	kidney	rhabdoid_tumour	MutSig
2565	GABRG1	22722829	WGS	brain	medulloblastoma	MuSiC
2623	GATA1	14993899	Known Cancer	multiple	-	-
2623	GATA1	29489755	WGS-WES-RNAseq	multiple	pan-cancer_paediatric	GRIN, MutSig
2623	GATA1	23539594	Known Cancer	multiple	-	-
2624	GATA2	22976956	Gene panel	blood	acute_myeloid_leukemia	Recurrence-based
2624	GATA2	14993899	Known Cancer	multiple	-	-
2624	GATA2	29489755	WGS-WES-RNAseq	multiple	pan-cancer_paediatric	GRIN, MutSig
2624	GATA2	26457647	WES-gene panel	blood	juvenile_myelomonocytic_leukemia	Paper-specific, Literature-based
2624	GATA2	23539594	Known Cancer	multiple	-	-
2624	GATA2	26939876	Gene panel	breast	triple_negative_breast_cancer	Recurrence-based, Paper-specific
2624	GATA2	21399634	WES	blood	acute_monocytic_leukemia	Recurrence-based
2625	GATA3	29625053	WES	multiple	pan-cancer_adult	PanSoftWare
2625	GATA3	22722202	WES	breast	breast_cancer	MutSig
2625	GATA3	23000897	WES	breast	breast_cancer	MuSiC
2625	GATA3	26451490	WES	breast	breast_cancer	MutSig
2625	GATA3	14993899	Known Cancer	multiple	-	-
2625	GATA3	24132290	WES	multiple	pan-cancer_adult	MuSiC
2625	GATA3	26437031	WGS-WES-Gene panel	blood	T-cell_leukemia/lymphoma	MutSig
2625	GATA3	24390350	WES	multiple	pan-cancer_adult	MutSig
2625	GATA3	28027327	WES	breast	breast_cancer	MutSig
2625	GATA3	29489755	WGS-WES-RNAseq	multiple	pan-cancer_paediatric	GRIN, MutSig
2625	GATA3	28412734	WGS	hepatobiliary	hepatocellular_carcinoma	Recurrence-based, Literature-based
2625	GATA3	22608084	WGS	breast	breast_cancer	Literature-based
2625	GATA3	27135926	WGS	breast	breast_cancer	Paper-specific
2625	GATA3	27161491	Gene panel	breast	breast_cancer	Recurrence-based
2625	GATA3	26960396	Gene panel	breast	male_breast_cancer	MutSig
2625	GATA3	22722201	WES	breast	breast_cancer	Greenman-based
2625	GATA3	23539594	Known Cancer	multiple	-	-
2625	GATA3	26939876	Gene panel	breast	triple_negative_breast_cancer	Recurrence-based, Paper-specific
2625	GATA3	26099045	WGS	breast	breast_cancer	Recurrence-based, Literature-based
2625	GATA3	22237106	WGS	blood	acute_lymphoblastic_leukemia	Recurrence-based
2632	GBE1	27009842	WES	peripheral_nervous_system	neuroblastoma	Paper-specific
2719	GPC3	14993899	Known Cancer	multiple	-	-
2735	GLI1	14993899	Known Cancer	multiple	-	-
2737	GLI3	20668451	Gene panel	lung	lung_cancer_(all_histologies)	Wood-based
2737	GLI3	24816253	WGS	stomach	gastric_adenocarcinoma	Youn-based
2737	GLI3	25855536	WES	pancreas	pancreatic_ductal_adenocarcinoma	MutSig
2765	GML	18772396	WES	brain	glioblastoma	Wood-based
2767	GNA11	29625053	WES	multiple	pan-cancer_adult	PanSoftWare
2767	GNA11	14993899	Known Cancer	multiple	-	-
2767	GNA11	26683228	WGS-WES	uvea	melanoma	Recurrence-based, Literature-based
2767	GNA11	28810145	WES	uvea	melanoma	MutSig
2767	GNA11	23539594	Known Cancer	multiple	-	-
2768	GNA12	26258846	WES	hepatobiliary	biliary_tract_cancer	MutSig
2769	GNA15	21499247	WES	skin	melanoma	Paper-specific
2771	GNAI2	26091043	WES	skin	melanoma	InVEx, MutSig
2776	GNAQ	29625053	WES	multiple	pan-cancer_adult	PanSoftWare
2776	GNAQ	14993899	Known Cancer	multiple	-	-
2776	GNAQ	26683228	WGS-WES	uvea	melanoma	Recurrence-based, Literature-based
2776	GNAQ	28810145	WES	uvea	melanoma	MutSig
2776	GNAQ	23539594	Known Cancer	multiple	-	-
2778	GNAS	29625053	WES	multiple	pan-cancer_adult	PanSoftWare
2778	GNAS	24700472	WES	adrenal_gland	adrenocortical_adenoma	MutSig, Recurrence-based
2778	GNAS	18948947	Gene panel	lung	lung_adenocarcinoma	MuSiC
2778	GNAS	28297679	WES	hepatobiliary	cholangiocarcinoma	MutSig
2778	GNAS	14993899	Known Cancer	multiple	-	-
2778	GNAS	28296713	WES	skin	mucosal_melanoma	Recurrence-based
2778	GNAS	22327622	Gene panel	colorectal	colorectal_adenocarcinoma	Recurrence-based
2778	GNAS	26258846	WES	hepatobiliary	biliary_tract_cancer	MutSig
2778	GNAS	27135926	WGS	breast	breast_cancer	Paper-specific
2778	GNAS	22561520	WES	hepatobiliary	cholangiocarcinoma	Recurrence-based
2778	GNAS	26000489	WES	prostate	prostate_cancer	MutSig
2778	GNAS	27313181	WES	stomach	mucinous_gastric_cancer	Recurrence-based
2778	GNAS	28810144	WES plus targeted deep resequencing	pancreas	pancreatic_ductal_adenocarcinoma	MutSig
2778	GNAS	23539594	Known Cancer	multiple	-	-
2778	GNAS	25855536	WES	pancreas	pancreatic_ductal_adenocarcinoma	MutSig
2778	GNAS	22158988	WES	pancreas	pancreatic_neoplastic_cysts	Recurrence-based
2778	GNAS	26806338	WES-gene panel	small_intestine	ampullary_adenocarcinoma	Recurrence-based
2779	GNAT1	22158541	WES	blood	chronic_lymphocytic_leukemia	Recurrence-based
2782	GNB1	26466571	WES	blood	chronic_lymphocytic_leukemia	MutSig
2782	GNB1	24390350	WES	multiple	pan-cancer_adult	MutSig
2782	GNB1	29489755	WGS-WES-RNAseq	multiple	pan-cancer_paediatric	GRIN, MutSig
2805	GOT1	24390350	WES	multiple	pan-cancer_adult	MutSig
2846	LPAR4	26941397	WES	thyroid	papillary_thyroid_cancer	MutSig
2847	MCHR1	22037554	WES	stomach	gastric_adenocarcinoma	Wood-based
2854	GPR32	23000897	WES	breast	breast_cancer	MuSiC
2873	GPS1	27325650	WES	penis	penile_squamous_cancer	IntOGen, Literature-based
2874	GPS2	29625053	WES	multiple	pan-cancer_adult	PanSoftWare
2874	GPS2	23000897	WES	breast	breast_cancer	MuSiC
2874	GPS2	26451490	WES	breast	breast_cancer	MutSig
2874	GPS2	24390350	WES	multiple	pan-cancer_adult	MutSig
2874	GPS2	27161491	Gene panel	breast	breast_cancer	Recurrence-based
2874	GPS2	22820256	WES	brain	medulloblastoma	MutSig
2880	GPX5	24120142	WES	brain	glioblastoma	InVEx, MutSig
2885	GRB2	21804550	WES	blood	diffuse_large_B-cell_lymphoma	Paper-specific
2889	RAPGEF1	28452984	WES	blood	chronic_myeloid_leukemia	Recurrence-based, Literature-based
2891	GRIA2	26451490	WES	breast	breast_cancer	MutSig
2892	GRIA3	18772397	WES	pancreas	pancreatic_ductal_adenocarcinoma	Wood-based
2899	GRIK3	22941189	WES	lung	small_cell_lung_cancer	Wood-based
2903	GRIN2A	14993899	Known Cancer	multiple	-	-
2903	GRIN2A	21499247	WES	skin	melanoma	Paper-specific
2903	GRIN2A	26939876	Gene panel	breast	triple_negative_breast_cancer	Recurrence-based, Paper-specific
2906	GRIN2D	29625053	WES	multiple	pan-cancer_adult	PanSoftWare
2908	NR3C1	28452984	WES	blood	chronic_myeloid_leukemia	Recurrence-based, Literature-based
2909	ARHGAP35	29625053	WES	multiple	pan-cancer_adult	PanSoftWare
2909	ARHGAP35	27158780	WES	lung	lung_cancer_(all_histologies)	MutSig
2909	ARHGAP35	28292439	WES	uterus	uterine_carcinosarcoma	MutSig
2909	ARHGAP35	26451490	WES	breast	breast_cancer	MutSig
2909	ARHGAP35	27348297	WES	uterus	endometrial_cancer	MutSig
2909	ARHGAP35	24132290	WES	multiple	pan-cancer_adult	MuSiC
2909	ARHGAP35	24390350	WES	multiple	pan-cancer_adult	MutSig
2911	GRM1	20668451	Gene panel	lung	lung_cancer_(all_histologies)	Wood-based
2911	GRM1	24658000	WGS	bone	chondromyxoid_fibroma	Recurrence-based
2913	GRM3	14993899	Known Cancer	multiple	-	-
2913	GRM3	22842228	WES	skin	melanoma	MuSiC
2913	GRM3	18772396	WES	brain	glioblastoma	Wood-based
2918	GRM8	20668451	Gene panel	lung	lung_cancer_(all_histologies)	Wood-based
2918	GRM8	22941189	WES	lung	small_cell_lung_cancer	Wood-based
2918	GRM8	21798893	WES	head_and_neck	squamous_head_and_neck_cancer	MutSig
2918	GRM8	22156295	WES	pancreas	pancreatic_ductal_adenocarcinoma	Recurrence-based
2956	MSH6	29625053	WES	multiple	pan-cancer_adult	PanSoftWare
2956	MSH6	22810696	WES	colorectal	colorectal_adenocarcinoma	MutSig
2956	MSH6	14993899	Known Cancer	multiple	-	-
2956	MSH6	25576899	WES-gene panel	thyroid	anaplastic_thyroid_carcinoma	Recurrence-based, Literature-based
2956	MSH6	28098136	WGS-WES	head_and_neck	nasopharyngeal_carcinoma	MutSig
2956	MSH6	28452984	WES	blood	chronic_myeloid_leukemia	Recurrence-based, Literature-based
2956	MSH6	23539594	Known Cancer	multiple	-	-
2956	MSH6	27270107	WES	brain	glioblastoma	MutComFocal
2969	GTF2I	29625053	WES	multiple	pan-cancer_adult	PanSoftWare
2969	GTF2I	24974848	WES	thymus	thymic_carcinoma	Recurrence-based
2969	GTF2I	29438696	WES	thymus	thymic_carcinoma	MutSig
2977	GUCY1A2	18772397	WES	pancreas	pancreatic_ductal_adenocarcinoma	Wood-based
2990	GUSB	24390350	WES	multiple	pan-cancer_adult	MutSig
3006	HIST1H1C	29625053	WES	multiple	pan-cancer_adult	PanSoftWare
3006	HIST1H1C	24132290	WES	multiple	pan-cancer_adult	MuSiC
3006	HIST1H1C	28064239	WES	blood	follicular_lymphoma	MuSiC
3006	HIST1H1C	22343534	WES	blood	diffuse_large_B-cell_lymphoma	MutSig
3006	HIST1H1C	28479318	WES-gene panel	blood	cutaneous_DLBCL	MuSiC
3006	HIST1H1C	21796119	WES	blood	non-Hodgkin_lymphoma	Greenman-based
3006	HIST1H1C	24362818	WGS-WES	blood	follicular_lymphoma	Recurrence-based
3006	HIST1H1C	28622513	WES	hepatobiliary	hepatocellular_carcinoma	MutSig, Recurrence-based
3007	HIST1H1D	28064239	WES	blood	follicular_lymphoma	MuSiC
3007	HIST1H1D	24362818	WGS-WES	blood	follicular_lymphoma	Recurrence-based
3008	HIST1H1E	29625053	WES	multiple	pan-cancer_adult	PanSoftWare
3008	HIST1H1E	28064239	WES	blood	follicular_lymphoma	MuSiC
3008	HIST1H1E	23415222	WES	blood	chronic_lymphocytic_leukemia	MutSig
3008	HIST1H1E	26466571	WES	blood	chronic_lymphocytic_leukemia	MutSig
3008	HIST1H1E	24390350	WES	multiple	pan-cancer_adult	MutSig
3008	HIST1H1E	22343534	WES	blood	diffuse_large_B-cell_lymphoma	MutSig
3008	HIST1H1E	28479318	WES-gene panel	blood	cutaneous_DLBCL	MuSiC
3008	HIST1H1E	24362818	WGS-WES	blood	follicular_lymphoma	Recurrence-based
3009	HIST1H1B	28064239	WES	blood	follicular_lymphoma	MuSiC
3009	HIST1H1B	26466571	WES	blood	chronic_lymphocytic_leukemia	MutSig
3009	HIST1H1B	24362818	WGS-WES	blood	follicular_lymphoma	Recurrence-based
3013	HIST1H2AD	23334668	WGS-WES	blood	acute_lymphocytic_leukemia	Recurrence-based
3017	HIST1H2BD	24132290	WES	multiple	pan-cancer_adult	MuSiC
3017	HIST1H2BD	24362818	WGS-WES	blood	follicular_lymphoma	Recurrence-based
3020	H3F3A	29625053	WES	multiple	pan-cancer_adult	PanSoftWare
3020	H3F3A	24162739	WGS	bone	chondroblastoma	Recurrence-based
3020	H3F3A	24705254	WGS-WES	brain	diffuse_intrinsic_pontine_glioma	Recurrence-based
3020	H3F3A	24705250	WES	brain	astrocytoma	Recurrence-based
3020	H3F3A	14993899	Known Cancer	multiple	-	-
3020	H3F3A	29489754	WGS-WES	multiple	pan-cancer_paediatric	MuSiC
3020	H3F3A	28545165	WES plus targeted deep resequencing	bone	bone_giant_cell_tumour	Recurrence-based
3020	H3F3A	22286061	WES	brain	glioblastoma	Recurrence-based
3020	H3F3A	23539594	Known Cancer	multiple	-	-
3020	H3F3A	23583981	WGS-WES	brain	paediatric_low_grade_glioma	MuSiC, Paper-specific
3020	H3F3A	24880341	WES	brain	glioma	Recurrence-based
3021	H3F3B	24162739	WGS	bone	chondroblastoma	Recurrence-based
3021	H3F3B	14993899	Known Cancer	multiple	-	-
3066	HDAC2	29489754	WGS-WES	multiple	pan-cancer_paediatric	MuSiC
3066	HDAC2	25855536	WES	pancreas	pancreatic_ductal_adenocarcinoma	MutSig
3073	HEXA	27325650	WES	penis	penile_squamous_cancer	IntOGen, Literature-based
3080	CFHR2	21499247	WES	skin	melanoma	Paper-specific
3082	HGF	29625053	WES	multiple	pan-cancer_adult	PanSoftWare
3082	HGF	24132290	WES	multiple	pan-cancer_adult	MuSiC
3084	NRG1	14993899	Known Cancer	multiple	-	-
3091	HIF1A	14993899	Known Cancer	multiple	-	-
3092	HIP1	14993899	Known Cancer	multiple	-	-
3096	HIVEP1	26909576	WGS	pancreas	pancreatic_cancer_(all_histologies)	HOTNET2, OncodriveFM, MutSig
3101	HK3	27063598	WES-gene panel	blood	acute_promyelocytic_leukemia	Recurrence-based
3105	HLA-A	29625053	WES	multiple	pan-cancer_adult	PanSoftWare
3105	HLA-A	22960745	WES	lung	lung_squamous_cell_carcinoma	MutSig
3105	HLA-A	25631445	WES	head_and_neck	squamous_head_and_neck_cancer	MutSig
3105	HLA-A	21430775	WGS-WES	blood	multiple_myeloma	MutSig
3105	HLA-A	14993899	Known Cancer	multiple	-	-
3105	HLA-A	24390350	WES	multiple	pan-cancer_adult	MutSig
3105	HLA-A	25501392	WES	multiple	pan-cancer_adult	HOTNET2
3105	HLA-A	28098136	WGS-WES	head_and_neck	nasopharyngeal_carcinoma	MutSig
3105	HLA-A	22343534	WES	blood	diffuse_large_B-cell_lymphoma	MutSig
3105	HLA-A	28112728	WGS	cervix	cervical_cancer_(all_histologies)	MutSig
3106	HLA-B	29625053	WES	multiple	pan-cancer_adult	PanSoftWare
3106	HLA-B	26437031	WGS-WES-Gene panel	blood	T-cell_leukemia/lymphoma	MutSig
3106	HLA-B	24390350	WES	multiple	pan-cancer_adult	MutSig
3106	HLA-B	25501392	WES	multiple	pan-cancer_adult	HOTNET2
3106	HLA-B	22343534	WES	blood	diffuse_large_B-cell_lymphoma	MutSig
3106	HLA-B	24390348	WES	cervix	cervical_cancer_(all_histologies)	MutSig
3106	HLA-B	28112728	WGS	cervix	cervical_cancer_(all_histologies)	MutSig
3110	MNX1	14993899	Known Cancer	multiple	-	-
3123	HLA-DRB1	26451490	WES	breast	breast_cancer	MutSig
3131	HLF	14993899	Known Cancer	multiple	-	-
3146	HMGB1	21804550	WES	blood	diffuse_large_B-cell_lymphoma	Paper-specific
3159	HMGA1	14993899	Known Cancer	multiple	-	-
3169	FOXA1	29625053	WES	multiple	pan-cancer_adult	PanSoftWare
3169	FOXA1	22610119	WES	prostate	prostate_cancer	MutSig
3169	FOXA1	24476821	WES	bladder	bladder_cancer	MutSig
3169	FOXA1	26451490	WES	breast	breast_cancer	MutSig
3169	FOXA1	14993899	Known Cancer	multiple	-	-
3169	FOXA1	24132290	WES	multiple	pan-cancer_adult	MuSiC
3169	FOXA1	24390350	WES	multiple	pan-cancer_adult	MutSig
3169	FOXA1	27135926	WGS	breast	breast_cancer	Paper-specific
3169	FOXA1	26000489	WES	prostate	prostate_cancer	MutSig
3169	FOXA1	26544944	WGS-WES	prostate	prostate_cancer	MutSig
3169	FOXA1	26099045	WGS	breast	breast_cancer	Recurrence-based, Literature-based
3170	FOXA2	29625053	WES	multiple	pan-cancer_adult	PanSoftWare
3170	FOXA2	27348297	WES	uterus	endometrial_cancer	MutSig
3170	FOXA2	24132290	WES	multiple	pan-cancer_adult	MuSiC
3172	HNF4A	27064257	WGS	hepatobiliary	pan-liver	Paper-specific
3177	SLC29A2	23143597	WES	blood	Burkitt&#39;s_lymphoma	Recurrence-based
3181	HNRNPA2B1	14993899	Known Cancer	multiple	-	-
3181	HNRNPA2B1	26437031	WGS-WES-Gene panel	blood	T-cell_leukemia/lymphoma	MutSig
3181	HNRNPA2B1	25362482	WES	hepatobiliary	hepatocellular_carcinoma	MutSig
3190	HNRNPK	23634996	WGS-WES	blood	acute_myeloid_leukemia	MuSiC
3192	HNRNPU	28064239	WES	blood	follicular_lymphoma	MuSiC
3195	TLX1	14993899	Known Cancer	multiple	-	-
3195	TLX1	29489755	WGS-WES-RNAseq	multiple	pan-cancer_paediatric	GRIN, MutSig
3204	HOXA7	23636398	WES	uterus	endometrial_cancer	MuSiC
3205	HOXA9	14993899	Known Cancer	multiple	-	-
3206	HOXA10	29489755	WGS-WES-RNAseq	multiple	pan-cancer_paediatric	GRIN, MutSig
3207	HOXA11	14993899	Known Cancer	multiple	-	-
3209	HOXA13	14993899	Known Cancer	multiple	-	-
3227	HOXC11	14993899	Known Cancer	multiple	-	-
3229	HOXC13	14993899	Known Cancer	multiple	-	-
3237	HOXD11	14993899	Known Cancer	multiple	-	-
3239	HOXD13	14993899	Known Cancer	multiple	-	-
3242	HPD	23636398	WES	uterus	endometrial_cancer	MuSiC
3265	HRAS	21798897	WES	head_and_neck	squamous_head_and_neck_cancer	Recurrence-based
3265	HRAS	26934577	WES	head_and_neck	oral_squamous_cell_carcinoma	OncodriveFM, Youn-based
3265	HRAS	29625053	WES	multiple	pan-cancer_adult	PanSoftWare
3265	HRAS	22610119	WES	prostate	prostate_cancer	MutSig
3265	HRAS	24633157	WGS-WES-Gene panel	soft_tissue	angiosarcoma	Greenman-based
3265	HRAS	26950094	WES-gene panel	skin	skin_basal_cell_carcinoma	MutSig, TumOnc
3265	HRAS	27158780	WES	lung	lung_cancer_(all_histologies)	MutSig
3265	HRAS	25417114	WES	thyroid	papillary_thyroid_cancer	MutSig
3265	HRAS	24476821	WES	bladder	bladder_cancer	MutSig
3265	HRAS	26121087	WGS	brain	neuroblastoma	Paper-specific
3265	HRAS	28162975	WES	adrenal_gland	pheochromocytoma,_paraganglioma	MutSig
3265	HRAS	14993899	Known Cancer	multiple	-	-
3265	HRAS	21822268	WES	bladder	bladder_cancer	Wood-based, Recurrence-based
3265	HRAS	24121792	WES	bladder	bladder_cancer	Wood-based
3265	HRAS	26214590	WES	skin	melanoma	MutSig
3265	HRAS	25576899	WES-gene panel	thyroid	anaplastic_thyroid_carcinoma	Recurrence-based, Literature-based
3265	HRAS	24390350	WES	multiple	pan-cancer_adult	MutSig
3265	HRAS	25501392	WES	multiple	pan-cancer_adult	HOTNET2
3265	HRAS	27135926	WGS	breast	breast_cancer	Paper-specific
3265	HRAS	24974848	WES	thymus	thymic_carcinoma	Recurrence-based
3265	HRAS	29438696	WES	thymus	thymic_carcinoma	MutSig
3265	HRAS	28988769	WES	bladder	bladder_cancer	MutSig
3265	HRAS	27236916	WES-gene panel	thyroid	papillary_thyroid_cancer	Recurrence-based
3265	HRAS	21798893	WES	head_and_neck	squamous_head_and_neck_cancer	MutSig
3265	HRAS	26544944	WGS-WES	prostate	prostate_cancer	MutSig
3265	HRAS	23539594	Known Cancer	multiple	-	-
3265	HRAS	26625313	WES	bladder	bladder_cancer	MutSig
3280	HES1	28988769	WES	bladder	bladder_cancer	MutSig
3297	HSF1	26258846	WES	hepatobiliary	biliary_tract_cancer	MutSig
3305	HSPA1L	27149842	WES	colorectal	colorectal_adenocarcinoma	MutSig
3308	HSPA4	28296713	WES	skin	mucosal_melanoma	Recurrence-based
3320	HSP90AA1	14993899	Known Cancer	multiple	-	-
3326	HSP90AB1	14993899	Known Cancer	multiple	-	-
3326	HSP90AB1	24390350	WES	multiple	pan-cancer_adult	MutSig
3337	DNAJB1	14993899	Known Cancer	multiple	-	-
3339	HSPG2	27058444	WGS-WES	esophagus	esophageal_squamous_carcinoma	MutSig
3354	HTR1E	22484628	WES	stomach	gastric_adenocarcinoma	Recurrence-based
3371	TNC	14993899	Known Cancer	multiple	-	-
3371	TNC	22842228	WES	skin	melanoma	MuSiC
3394	IRF8	21796119	WES	blood	non-Hodgkin_lymphoma	Greenman-based
3399	ID3	14993899	Known Cancer	multiple	-	-
3399	ID3	29489754	WGS-WES	multiple	pan-cancer_paediatric	MuSiC
3399	ID3	23143597	WES	blood	Burkitt&#39;s_lymphoma	Recurrence-based
3399	ID3	23143595	WGS-WES	blood	Burkitt&#39;s_lymphoma	Recurrence-based
3417	IDH1	29625053	WES	multiple	pan-cancer_adult	PanSoftWare
3417	IDH1	22610119	WES	prostate	prostate_cancer	MutSig
3417	IDH1	21817013	WES	brain	oligodendroglioma	Recurrence-based
3417	IDH1	20399149	Gene panel	brain	glioblastoma	Paper-specific
3417	IDH1	24120142	WES	brain	glioblastoma	InVEx, MutSig
3417	IDH1	23634996	WGS-WES	blood	acute_myeloid_leukemia	MuSiC
3417	IDH1	26091043	WES	skin	melanoma	InVEx, MutSig
3417	IDH1	26061751	WES	brain	low_grade_glioma	MutSig
3417	IDH1	26824661	WGS-WES	brain	pan-glioma	MutSig
3417	IDH1	24185513	WES	hepatobiliary	cholangiocarcinoma	Recurrence-based
3417	IDH1	22976956	Gene panel	blood	acute_myeloid_leukemia	Recurrence-based
3417	IDH1	28297679	WES	hepatobiliary	cholangiocarcinoma	MutSig
3417	IDH1	14993899	Known Cancer	multiple	-	-
3417	IDH1	29489754	WGS-WES	multiple	pan-cancer_paediatric	MuSiC
3417	IDH1	24185509	WES	hepatobiliary	cholangiocarcinoma	Wood-based
3417	IDH1	24336570	WES	brain	low_grade_glioma	Recurrence-based
3417	IDH1	24132290	WES	multiple	pan-cancer_adult	MuSiC
3417	IDH1	26214590	WES	skin	melanoma	MutSig
3417	IDH1	24390350	WES	multiple	pan-cancer_adult	MutSig
3417	IDH1	29489755	WGS-WES-RNAseq	multiple	pan-cancer_paediatric	GRIN, MutSig
3417	IDH1	27063598	WES-gene panel	blood	acute_promyelocytic_leukemia	Recurrence-based
3417	IDH1	19657110	WGS	blood	acute_myeloid_leukemia	Paper-specific
3417	IDH1	26258846	WES	hepatobiliary	biliary_tract_cancer	MutSig
3417	IDH1	24325359	WES	blood	myeloproliferative_neoplasm	Paper-specific
3417	IDH1	18772396	WES	brain	glioblastoma	Wood-based
3417	IDH1	26343386	WGS-WES-Gene panel	skin	desmoplastic_melanoma	Recurrence-based, Literature-based
3417	IDH1	23770606	WES	bone	chondrosarcoma	Recurrence-based
3417	IDH1	23539594	Known Cancer	multiple	-	-
3417	IDH1	27270107	WES	brain	glioblastoma	MutComFocal
3417	IDH1	22817890	WGS	blood	acute_myeloid_leukemia	Recurrence-based
3417	IDH1	24880341	WES	brain	glioma	Recurrence-based
3418	IDH2	29625053	WES	multiple	pan-cancer_adult	PanSoftWare
3418	IDH2	23634996	WGS-WES	blood	acute_myeloid_leukemia	MuSiC
3418	IDH2	26061751	WES	brain	low_grade_glioma	MutSig
3418	IDH2	26824661	WGS-WES	brain	pan-glioma	MutSig
3418	IDH2	28297679	WES	hepatobiliary	cholangiocarcinoma	MutSig
3418	IDH2	14993899	Known Cancer	multiple	-	-
3418	IDH2	24132290	WES	multiple	pan-cancer_adult	MuSiC
3418	IDH2	26437031	WGS-WES-Gene panel	blood	T-cell_leukemia/lymphoma	MutSig
3418	IDH2	24390350	WES	multiple	pan-cancer_adult	MutSig
3418	IDH2	29489755	WGS-WES-RNAseq	multiple	pan-cancer_paediatric	GRIN, MutSig
3418	IDH2	27063598	WES-gene panel	blood	acute_promyelocytic_leukemia	Recurrence-based
3418	IDH2	26648538	WGS-Gene panel	blood	chronic_myelomonocytic_leukemia	Recurrence-based
3418	IDH2	26908133	WGS-WES	blood	chronic_myelomonocytic_leukemia	DrGap
3418	IDH2	24325359	WES	blood	myeloproliferative_neoplasm	Paper-specific
3418	IDH2	24413734	WES	blood	peripheral_T-cell_lymphoma	Recurrence-based
3418	IDH2	24413737	WES	blood	angioimmunoblastic_T-cell_lymphoma	Recurrence-based
3418	IDH2	23770606	WES	bone	chondrosarcoma	Recurrence-based
3418	IDH2	23539594	Known Cancer	multiple	-	-
3418	IDH2	22817890	WGS	blood	acute_myeloid_leukemia	Recurrence-based
3429	IFI27	28249600	WES	blood	acute_myeloid_leukemia	MutSig
3437	IFIT3	22722829	WGS	brain	medulloblastoma	MuSiC
3480	IGF1R	27135926	WGS	breast	breast_cancer	Paper-specific
3480	IGF1R	27270107	WES	brain	glioblastoma	MutComFocal
3480	IGF1R	26939876	Gene panel	breast	triple_negative_breast_cancer	Recurrence-based, Paper-specific
3481	IGF2	25743702	WGS-WES	adrenal_gland	adrenocortical_carcinoma	Recurrence-based
3482	IGF2R	24705252	WGS-WES	brain	diffuse_intrinsic_pontine_glioma	Recurrence-based
3482	IGF2R	22156295	WES	pancreas	pancreatic_ductal_adenocarcinoma	Recurrence-based
3516	RBPJ	28548104	WGS	esophagus	esophageal_squamous_carcinoma	MutSig
3551	IKBKB	14993899	Known Cancer	multiple	-	-
3551	IKBKB	26437031	WGS-WES-Gene panel	blood	T-cell_leukemia/lymphoma	MutSig
3551	IKBKB	26258846	WES	hepatobiliary	biliary_tract_cancer	MutSig
3552	IL1A	20668451	Gene panel	lung	lung_cancer_(all_histologies)	Wood-based
3553	IL1B	22156295	WES	pancreas	pancreatic_ductal_adenocarcinoma	Recurrence-based
3558	IL2	14993899	Known Cancer	multiple	-	-
3561	IL2RG	18772397	WES	pancreas	pancreatic_ductal_adenocarcinoma	Wood-based
3566	IL4R	26824661	WGS-WES	brain	pan-glioma	MutSig
3572	IL6ST	29625053	WES	multiple	pan-cancer_adult	PanSoftWare
3572	IL6ST	14993899	Known Cancer	multiple	-	-
3572	IL6ST	28622513	WES	hepatobiliary	hepatocellular_carcinoma	MutSig, Recurrence-based
3575	IL7R	29625053	WES	multiple	pan-cancer_adult	PanSoftWare
3575	IL7R	28256603	WES plus targeted deep resequencing	head_and_neck	nasopharyngeal_carcinoma	Literature-based, Paper-specific
3575	IL7R	14993899	Known Cancer	multiple	-	-
3575	IL7R	27149842	WES	colorectal	colorectal_adenocarcinoma	MutSig
3575	IL7R	24390350	WES	multiple	pan-cancer_adult	MutSig
3575	IL7R	29489755	WGS-WES-RNAseq	multiple	pan-cancer_paediatric	GRIN, MutSig
3575	IL7R	22237106	WGS	blood	acute_lymphoblastic_leukemia	Recurrence-based
3597	IL13RA1	22895193	WES	colorectal	colorectal_adenocarcinoma	Wood-based
3607	FOXK2	25501392	WES	multiple	pan-cancer_adult	HOTNET2
3621	ING1	27149842	WES	colorectal	colorectal_adenocarcinoma	MutSig
3621	ING1	24390350	WES	multiple	pan-cancer_adult	MutSig
3624	INHBA	18948947	Gene panel	lung	lung_adenocarcinoma	MuSiC
3624	INHBA	27687306	WES	lung	lung_adenocarcinoma	InVEx
3631	INPP4A	23636398	WES	uterus	endometrial_cancer	MuSiC
3636	INPPL1	29625053	WES	multiple	pan-cancer_adult	PanSoftWare
3636	INPPL1	24390350	WES	multiple	pan-cancer_adult	MutSig
3643	INSR	27325650	WES	penis	penile_squamous_cancer	IntOGen, Literature-based
3646	EIF3E	14993899	Known Cancer	multiple	-	-
3660	IRF2	29625053	WES	multiple	pan-cancer_adult	PanSoftWare
3660	IRF2	22561517	WES	hepatobiliary	hepatocellular_carcinoma	Recurrence-based
3662	IRF4	14993899	Known Cancer	multiple	-	-
3662	IRF4	26437031	WGS-WES-Gene panel	blood	T-cell_leukemia/lymphoma	MutSig
3662	IRF4	26466571	WES	blood	chronic_lymphocytic_leukemia	MutSig
3662	IRF4	24390350	WES	multiple	pan-cancer_adult	MutSig
3662	IRF4	21796119	WES	blood	non-Hodgkin_lymphoma	Greenman-based
3663	IRF5	26790612	WES	head_and_neck	squamous_head_and_neck_cancer	MuSiC
3664	IRF6	29625053	WES	multiple	pan-cancer_adult	PanSoftWare
3664	IRF6	27158780	WES	lung	lung_cancer_(all_histologies)	MutSig
3664	IRF6	24390350	WES	multiple	pan-cancer_adult	MutSig
3664	IRF6	21798893	WES	head_and_neck	squamous_head_and_neck_cancer	MutSig
3664	IRF6	25855536	WES	pancreas	pancreatic_ductal_adenocarcinoma	MutSig
3665	IRF7	28064239	WES	blood	follicular_lymphoma	MuSiC
3667	IRS1	20601955	Gene panel	soft_tissue	soft_tissue_sarcoma	Recurrence-based
3667	IRS1	26648538	WGS-Gene panel	blood	chronic_myelomonocytic_leukemia	Recurrence-based
3676	ITGA4	26091043	WES	skin	melanoma	InVEx, MutSig
3676	ITGA4	28296713	WES	skin	mucosal_melanoma	Recurrence-based
3682	ITGAE	25855536	WES	pancreas	pancreatic_ductal_adenocarcinoma	MutSig
3685	ITGAV	14993899	Known Cancer	multiple	-	-
3695	ITGB7	24390350	WES	multiple	pan-cancer_adult	MutSig
3697	ITIH1	27149842	WES	colorectal	colorectal_adenocarcinoma	MutSig
3702	ITK	14993899	Known Cancer	multiple	-	-
3702	ITK	20668451	Gene panel	lung	lung_cancer_(all_histologies)	Wood-based
3702	ITK	26258847	WES-gene panel	blood	cutaneous_T_cell_lymphoma	Recurrence-based
3707	ITPKB	23415222	WES	blood	chronic_lymphocytic_leukemia	MutSig
3707	ITPKB	24390350	WES	multiple	pan-cancer_adult	MutSig
3710	ITPR3	26909576	WGS	pancreas	pancreatic_cancer_(all_histologies)	HOTNET2, OncodriveFM, MutSig
3716	JAK1	29625053	WES	multiple	pan-cancer_adult	PanSoftWare
3716	JAK1	14993899	Known Cancer	multiple	-	-
3716	JAK1	27348297	WES	uterus	endometrial_cancer	MutSig
3716	JAK1	29489755	WGS-WES-RNAseq	multiple	pan-cancer_paediatric	GRIN, MutSig
3716	JAK1	23539594	Known Cancer	multiple	-	-
3716	JAK1	22237106	WGS	blood	acute_lymphoblastic_leukemia	Recurrence-based
3717	JAK2	29625053	WES	multiple	pan-cancer_adult	PanSoftWare
3717	JAK2	14993899	Known Cancer	multiple	-	-
3717	JAK2	22327622	Gene panel	lung	non-small_cell_lung_cancer	Recurrence-based
3717	JAK2	29489755	WGS-WES-RNAseq	multiple	pan-cancer_paediatric	GRIN, MutSig
3717	JAK2	26648538	WGS-Gene panel	blood	chronic_myelomonocytic_leukemia	Recurrence-based
3717	JAK2	26908133	WGS-WES	blood	chronic_myelomonocytic_leukemia	DrGap
3717	JAK2	24325359	WES	blood	myeloproliferative_neoplasm	Paper-specific
3717	JAK2	23539594	Known Cancer	multiple	-	-
3718	JAK3	29625053	WES	multiple	pan-cancer_adult	PanSoftWare
3718	JAK3	23263491	WES	blood	acute_lymphoblastic_leukemia	MuSiC
3718	JAK3	14993899	Known Cancer	multiple	-	-
3718	JAK3	26437031	WGS-WES-Gene panel	blood	T-cell_leukemia/lymphoma	MutSig
3718	JAK3	29489755	WGS-WES-RNAseq	multiple	pan-cancer_paediatric	GRIN, MutSig
3718	JAK3	26457647	WES-gene panel	blood	juvenile_myelomonocytic_leukemia	Paper-specific, Literature-based
3718	JAK3	23539594	Known Cancer	multiple	-	-
3718	JAK3	22237106	WGS	blood	acute_lymphoblastic_leukemia	Recurrence-based
3725	JUN	14993899	Known Cancer	multiple	-	-
3735	KARS	27158780	WES	lung	lung_cancer_(all_histologies)	MutSig
3739	KCNA4	27313181	WES	stomach	mucinous_gastric_cancer	Recurrence-based
3742	KCNA6	21798893	WES	head_and_neck	squamous_head_and_neck_cancer	MutSig
3762	KCNJ5	14993899	Known Cancer	multiple	-	-
3782	KCNN3	26451490	WES	breast	breast_cancer	MutSig
3791	KDR	18948947	Gene panel	lung	lung_adenocarcinoma	MuSiC
3791	KDR	28297679	WES	hepatobiliary	cholangiocarcinoma	MutSig
3791	KDR	14993899	Known Cancer	multiple	-	-
3791	KDR	20668451	Gene panel	lung	lung_cancer_(all_histologies)	Wood-based
3791	KDR	24755198	WES-gene panel	skin	melanoma	Recurrence-based
3792	KEL	29625053	WES	multiple	pan-cancer_adult	PanSoftWare
3792	KEL	24120142	WES	brain	glioblastoma	InVEx, MutSig
3792	KEL	26824661	WGS-WES	brain	pan-glioma	MutSig
3792	KEL	24390350	WES	multiple	pan-cancer_adult	MutSig
3799	KIF5B	14993899	Known Cancer	multiple	-	-
3815	KIT	29625053	WES	multiple	pan-cancer_adult	PanSoftWare
3815	KIT	20601955	Gene panel	soft_tissue	soft_tissue_sarcoma	Recurrence-based
3815	KIT	23634996	WGS-WES	blood	acute_myeloid_leukemia	MuSiC
3815	KIT	22976956	Gene panel	blood	acute_myeloid_leukemia	Recurrence-based
3815	KIT	14993899	Known Cancer	multiple	-	-
3815	KIT	29489754	WGS-WES	multiple	pan-cancer_paediatric	MuSiC
3815	KIT	28296713	WES	skin	mucosal_melanoma	Recurrence-based
3815	KIT	24132290	WES	multiple	pan-cancer_adult	MuSiC
3815	KIT	24390350	WES	multiple	pan-cancer_adult	MutSig
3815	KIT	25609015	WES	testis	testicular_germ_cell_cancer	MutSig
3815	KIT	29489755	WGS-WES-RNAseq	multiple	pan-cancer_paediatric	GRIN, MutSig
3815	KIT	27063598	WES-gene panel	blood	acute_promyelocytic_leukemia	Recurrence-based
3815	KIT	23539594	Known Cancer	multiple	-	-
3815	KIT	24896186	WES	brain	intracranial_germ_cell	Recurrence-based
3815	KIT	26939876	Gene panel	breast	triple_negative_breast_cancer	Recurrence-based, Paper-specific
3815	KIT	22817890	WGS	blood	acute_myeloid_leukemia	Recurrence-based
3817	KLK2	14993899	Known Cancer	multiple	-	-
3837	KPNB1	28052061	WGS-WES	esophagus	esophageal_(squamous_and_adenocarcinoma)	MutSig
3843	IPO5	27009842	WES	peripheral_nervous_system	neuroblastoma	Paper-specific
3845	KRAS	25730765	WGS	blood	acute_lymphocytic_leukemia	Recurrence-based
3845	KRAS	26909576	WGS	pancreas	pancreatic_cancer_(all_histologies)	HOTNET2, OncodriveFM, MutSig
3845	KRAS	29625053	WES	multiple	pan-cancer_adult	PanSoftWare
3845	KRAS	21892161	WGS	colorectal	colorectal_adenocarcinoma	MutSig
3845	KRAS	24633157	WGS-WES-Gene panel	soft_tissue	angiosarcoma	Greenman-based
3845	KRAS	23103869	WES	pancreas	pancreatic_ductal_adenocarcinoma	MuSiC
3845	KRAS	26950094	WES-gene panel	skin	skin_basal_cell_carcinoma	MutSig, TumOnc
3845	KRAS	27158780	WES	lung	lung_cancer_(all_histologies)	MutSig
3845	KRAS	22810696	WES	colorectal	colorectal_adenocarcinoma	MutSig
3845	KRAS	23636398	WES	uterus	endometrial_cancer	MuSiC
3845	KRAS	23634996	WGS-WES	blood	acute_myeloid_leukemia	MuSiC
3845	KRAS	25417114	WES	thyroid	papillary_thyroid_cancer	MutSig
3845	KRAS	25079317	WES	stomach	gastric_adenocarcinoma	MutSig
3845	KRAS	25079552	WES	lung	lung_adenocarcinoma	MutSig
3845	KRAS	26824661	WGS-WES	brain	pan-glioma	MutSig
3845	KRAS	24185513	WES	hepatobiliary	cholangiocarcinoma	Recurrence-based
3845	KRAS	21430775	WGS-WES	blood	multiple_myeloma	MutSig
3845	KRAS	28292439	WES	uterus	uterine_carcinosarcoma	MutSig
3845	KRAS	28522256	WES	stomach	diffuse_gastric_adenocarcinoma	MutSig
3845	KRAS	26451490	WES	breast	breast_cancer	MutSig
3845	KRAS	18948947	Gene panel	lung	lung_adenocarcinoma	MuSiC
3845	KRAS	22976956	Gene panel	blood	acute_myeloid_leukemia	Recurrence-based
3845	KRAS	26121087	WGS	brain	neuroblastoma	Paper-specific
3845	KRAS	28297679	WES	hepatobiliary	cholangiocarcinoma	MutSig
3845	KRAS	14993899	Known Cancer	multiple	-	-
3845	KRAS	27149842	WES	colorectal	colorectal_adenocarcinoma	MutSig
3845	KRAS	27348297	WES	uterus	endometrial_cancer	MutSig
3845	KRAS	26804919	WES	small_intestine	ampullary_adenocarcinoma	MutSig
3845	KRAS	22980976	WGS	lung	non-small_cell_lung_cancer	MuSiC
3845	KRAS	29489754	WGS-WES	multiple	pan-cancer_paediatric	MuSiC
3845	KRAS	21822268	WES	bladder	bladder_cancer	Wood-based, Recurrence-based
3845	KRAS	24121792	WES	bladder	bladder_cancer	Wood-based
3845	KRAS	23334668	WGS-WES	blood	acute_lymphocytic_leukemia	Recurrence-based
3845	KRAS	26790612	WES	head_and_neck	squamous_head_and_neck_cancer	MuSiC
3845	KRAS	22980975	WES	lung	lung_adenocarcinoma	InVEx
3845	KRAS	18772397	WES	pancreas	pancreatic_ductal_adenocarcinoma	Wood-based
3845	KRAS	20826764	WES	ovary	ovarian_clear-cell_carcinoma	Recurrence-based
3845	KRAS	23817572	WGS	brain	astrocytoma	MuSiC
3845	KRAS	27687306	WES	lung	lung_adenocarcinoma	InVEx
3845	KRAS	20668451	Gene panel	lung	lung_cancer_(all_histologies)	Wood-based
3845	KRAS	20668451	Gene panel	ovary	ovarian_cancer	Wood-based
3845	KRAS	20668451	Gene panel	pancreas	pancreatic_ductal_adenocarcinoma	Wood-based
3845	KRAS	24132290	WES	multiple	pan-cancer_adult	MuSiC
3845	KRAS	26214590	WES	skin	melanoma	MutSig
3845	KRAS	25576899	WES-gene panel	thyroid	anaplastic_thyroid_carcinoma	Recurrence-based, Literature-based
3845	KRAS	23415222	WES	blood	chronic_lymphocytic_leukemia	MutSig
3845	KRAS	26466571	WES	blood	chronic_lymphocytic_leukemia	MutSig
3845	KRAS	24390350	WES	multiple	pan-cancer_adult	MutSig
3845	KRAS	25501392	WES	multiple	pan-cancer_adult	HOTNET2
3845	KRAS	24997986	WES	hepatobiliary	gallbladder_carcinoma	MutSig
3845	KRAS	26503331	WES-gene panel	lung	lung_squamous_cell_carcinoma	MutSig
3845	KRAS	28098136	WGS-WES	head_and_neck	nasopharyngeal_carcinoma	MutSig
3845	KRAS	24952746	WES	head_and_neck	nasopharyngeal_carcinoma	MutSig
3845	KRAS	22327622	Gene panel	colorectal	colorectal_adenocarcinoma	Recurrence-based
3845	KRAS	22327622	Gene panel	lung	non-small_cell_lung_cancer	Recurrence-based
3845	KRAS	29489755	WGS-WES-RNAseq	multiple	pan-cancer_paediatric	GRIN, MutSig
3845	KRAS	26648538	WGS-Gene panel	blood	chronic_myelomonocytic_leukemia	Recurrence-based
3845	KRAS	26908133	WGS-WES	blood	chronic_myelomonocytic_leukemia	DrGap
3845	KRAS	26258846	WES	hepatobiliary	biliary_tract_cancer	MutSig
3845	KRAS	27135926	WGS	breast	breast_cancer	Paper-specific
3845	KRAS	22561520	WES	hepatobiliary	cholangiocarcinoma	Recurrence-based
3845	KRAS	24413735	WES	blood	acute_lymphoblastic_leukemia	Greenman-based
3845	KRAS	25961940	WGS-WES	blood	acute_lymphoblastic_leukemia	MutSig
3845	KRAS	27161491	Gene panel	breast	breast_cancer	Recurrence-based
3845	KRAS	24974848	WES	thymus	thymic_carcinoma	Recurrence-based
3845	KRAS	28988769	WES	bladder	bladder_cancer	MutSig
3845	KRAS	26154128	WES-gene panel	pancreas	pancreatic_ductal_adenocarcinoma	Recurrence-based
3845	KRAS	22895193	WES	colorectal	colorectal_adenocarcinoma	Wood-based
3845	KRAS	22722201	WES	breast	breast_cancer	Greenman-based
3845	KRAS	26457647	WES-gene panel	blood	juvenile_myelomonocytic_leukemia	Paper-specific, Literature-based
3845	KRAS	24859340	WGS	head_and_neck	ameloblastoma	Recurrence-based
3845	KRAS	28622513	WES	hepatobiliary	hepatocellular_carcinoma	MutSig, Recurrence-based
3845	KRAS	28810144	WES plus targeted deep resequencing	pancreas	pancreatic_ductal_adenocarcinoma	MutSig
3845	KRAS	28112728	WGS	cervix	cervical_cancer_(all_histologies)	MutSig
3845	KRAS	28551381	WES-gene panel	colorectal	colorectal_adenocarcinoma	Recurrence-based
3845	KRAS	23539594	Known Cancer	multiple	-	-
3845	KRAS	25719666	WGS	pancreas	pancreatic_ductal_adenocarcinoma	MutSig, Recurrence-based
3845	KRAS	22156295	WES	pancreas	pancreatic_ductal_adenocarcinoma	Recurrence-based
3845	KRAS	24896186	WES	brain	intracranial_germ_cell	Recurrence-based
3845	KRAS	26939876	Gene panel	breast	triple_negative_breast_cancer	Recurrence-based, Paper-specific
3845	KRAS	25855536	WES	pancreas	pancreatic_ductal_adenocarcinoma	MutSig
3845	KRAS	22158988	WES	pancreas	pancreatic_neoplastic_cysts	Recurrence-based
3845	KRAS	26625313	WES	bladder	bladder_cancer	MutSig
3845	KRAS	26806338	WES-gene panel	small_intestine	ampullary_adenocarcinoma	Recurrence-based
3845	KRAS	26099045	WGS	breast	breast_cancer	Recurrence-based, Literature-based
3845	KRAS	21909114	WES	blood	myelodysplasia	Recurrence-based
3845	KRAS	26998897	WES	small_intestine	duodenal_adenocarcinoma	MutSig
3845	KRAS	22237106	WGS	blood	acute_lymphoblastic_leukemia	Recurrence-based
3845	KRAS	23583981	WGS-WES	brain	paediatric_low_grade_glioma	MuSiC, Paper-specific
3845	KRAS	25301631	WES	lung	lung_adenocarcinoma	Literature-based
[truncated: 4,537 more rows]

## Sheet: 2372_systemslevelproperties
entrez	symbol	duplicability	origin	essential_celllines_percentage	expressed_tissues_rnaseq	expressed_tissues_protein	ppin_degree	ppin_betweenness	ppin_clustering	complexes	mirna	function_reactome_level1	function_reactome	function_kegg_level1	function_kegg_level2	function_kegg	function_biocarta
125	ADH1B	2	Last Universal Common Ancestor	0	40	20	6	10635	0	2	24	Metabolism	Biological oxidations|Phase I - Functionalization of compounds|Ethanol oxidation	Human Diseases|Metabolism	Cancers: Overview|Amino acid metabolism|Carbohydrate metabolism|Global and overview maps|Lipid metabolism|Metabolism of cofactors and vitamins|Xenobiotics biodegradation and metabolism	Chemical carcinogenesis|Tyrosine metabolism|Glycolysis / Gluconeogenesis|Metabolic pathways|Fatty acid degradation|Retinol metabolism|Metabolism of xenobiotics by cytochrome P450|Drug metabolism - cytochrome P450	NA
148	ADRA1A	0	Metazoans	0	10	4	10	307	0.1556	6	1	Signal Transduction	Signaling by GPCR|GPCR downstream signalling|GPCR ligand binding|Class A/1 (Rhodopsin-like receptors)|G alpha (q) signalling events|G alpha (12/13) signalling events|Amine ligand-binding receptors|Adrenoceptors	Environmental Information Processing|Organismal Systems	Signaling molecules and interaction|Signal transduction|Circulatory system|Digestive system	Neuroactive ligand-receptor interaction|Calcium signaling pathway|cGMP-PKG signaling pathway|AMPK signaling pathway|Adrenergic signaling in cardiomyocytes|Vascular smooth muscle contraction|Salivary secretion	NA
182	JAG1	0	Last Universal Common Ancestor	0	43	40	15	912	0.1048	17	29	Disease|Gene expression (Transcription)|Signal Transduction	Diseases of signal transduction|Signaling by NOTCH1 in Cancer|Signaling by NOTCH1 PEST Domain Mutants in Cancer|Signaling by NOTCH1 t(7;9)(NOTCH1:M1580_K2555) Translocation Mutant|Signaling by NOTCH1 HD Domain Mutants in Cancer|Signaling by NOTCH1 HD+PEST Domain Mutants in Cancer|Constitutive Signaling by NOTCH1 PEST Domain Mutants|Constitutive Signaling by NOTCH1 t(7;9)(NOTCH1:M1580_K2555) Trans…	Environmental Information Processing|Human Diseases|Organismal Systems	Signal transduction|Cancers: Overview|Cancers: Specific types|Drug resistance: Antineoplastic|Infectious diseases: Viral|Immune system	Notch signaling pathway|Apelin signaling pathway|TNF signaling pathway|Pathways in cancer|Breast cancer|Endocrine resistance|Human papillomavirus infection|Th1 and Th2 cell differentiation	Phosphoinositides and their downstream targets.
186	AGTR2	0	Metazoans	0	4	NA	12	863	0.0455	3	11	Signal Transduction	Signaling by GPCR|GPCR downstream signalling|GPCR ligand binding|Class A/1 (Rhodopsin-like receptors)|G alpha (i) signalling events|Peptide ligand-binding receptors	Environmental Information Processing|Organismal Systems	Signaling molecules and interaction|Circulatory system|Endocrine system	Neuroactive ligand-receptor interaction|Adrenergic signaling in cardiomyocytes|Renin-angiotensin system	Bioactive Peptide Induced Signaling Pathway|Role of EGF Receptor Transactivation by GPCRs in Cardiac Hypertrophy|Angiotensin-converting enzyme 2 regulates heart function
213	ALB	0	Vertebrates	0	25	32	185	390414	0.0191	5	1	Disease|Hemostasis|Metabolism|Metabolism of proteins|Transport of small molecules|Vesicle-mediated transport	Disorders of transmembrane transporters|SLC transporter disorders|Defective SLCO1B3 causes hyperbilirubinemia, Rotor type (HBLRR)|Defective SLCO1B1 causes hyperbilirubinemia, Rotor type (HBLRR)|Platelet activation, signaling and aggregation|Response to elevated platelet cytosolic Ca2+|Platelet degranulation |Metabolism of lipids|Metabolism of steroids|Bile acid and bile salt metabolism|Recycling …	Organismal Systems	Endocrine system	Thyroid hormone synthesis	NA
215	ABCD1	0	Last Universal Common Ancestor	3.97727	43	NA	28	7668	0.0952	0	4	Disease|Metabolism|Transport of small molecules	Disorders of transmembrane transporters|ABC transporter disorders|Defective ABCD1 causes adrenoleukodystrophy (ALD)|Metabolism of lipids|Fatty acid metabolism|alpha-linolenic (omega3) and linoleic (omega6) acid metabolism|Peroxisomal lipid metabolism|Linoleic acid (LA) metabolism|alpha-linolenic acid (ALA) metabolism|Beta-oxidation of very long chain fatty acids|ABC-family proteins mediated trans…	Cellular Processes|Environmental Information Processing	Transport and catabolism|Membrane transport	Peroxisome|ABC transporters	NA
338	APOB	0	Metazoans	0	5	7	62	42550	0.0476	47	11	Hemostasis|Immune System|Metabolism|Metabolism of proteins|Signal Transduction|Transport of small molecules|Vesicle-mediated transport	Cell surface interactions at the vascular wall|Platelet homeostasis|Platelet sensitization by LDL|Innate Immune System|Toll-Like Receptors Cascades|Regulation of TLR by endogenous ligand|Metabolism of vitamins and cofactors|Metabolism of fat-soluble vitamins|Retinoid metabolism and transport|Regulation of Insulin-like Growth Factor (IGF) transport and uptake by Insulin-like Growth Factor Binding …	Organismal Systems	Digestive system	Fat digestion and absorption|Vitamin digestion and absorption|Cholesterol metabolism	NA
435	ASL	0	Last Universal Common Ancestor	1.69492	43	5	16	1893	0.0667	0	0	Metabolism	Metabolism of amino acids and derivatives|Metabolism of polyamines|Urea cycle	Metabolism	Amino acid metabolism|Global and overview maps	Arginine biosynthesis|Alanine, aspartate and glutamate metabolism|Metabolic pathways|Biosynthesis of amino acids	NA
495	ATP4A	0	Last Universal Common Ancestor	1.31579	3	1	88	78748	0.0238	1	1	Transport of small molecules	Ion channel transport|Ion transport by P-type ATPases	Metabolism|Organismal Systems	Energy metabolism|Digestive system|Excretory system	Oxidative phosphorylation|Gastric acid secretion|Collecting duct acid secretion	NA
710	SERPING1	0	Last Universal Common Ancestor	0	43	3	19	9143	0.0468	5	38	Hemostasis|Immune System	Formation of Fibrin Clot (Clotting Cascade)|Platelet activation, signaling and aggregation|Intrinsic Pathway of Fibrin Clot Formation|Response to elevated platelet cytosolic Ca2+|Platelet degranulation |Innate Immune System|Complement cascade|Regulation of Complement cascade	Human Diseases|Organismal Systems	Infectious diseases: Bacterial|Immune system	Pertussis|Complement and coagulation cascades	Intrinsic Prothrombin Activation Pathway
718	C3	0	Metazoans	5.40541	43	2	47	42702	0.0324	28	116	Immune System|Metabolism of proteins|Signal Transduction	Adaptive Immune System|Innate Immune System|Complement cascade|Immunoregulatory interactions between a Lymphoid and a non-Lymphoid cell|Neutrophil degranulation|Initial triggering of complement|Activation of C3 and C5|Regulation of Complement cascade|Alternative complement activation|Regulation of Insulin-like Growth Factor (IGF) transport and uptake by Insulin-like Growth Factor Binding Proteins…	Cellular Processes|Human Diseases|Organismal Systems	Transport and catabolism|Cancers: Overview|Immune diseases|Infectious diseases: Bacterial|Infectious diseases: Parasitic|Infectious diseases: Viral|Immune system	Phagosome|Viral carcinogenesis|Systemic lupus erythematosus|Pertussis|Legionellosis|Staphylococcus aureus infection|Tuberculosis|Leishmaniasis|Chagas disease (American trypanosomiasis)|Kaposi's sarcoma-associated herpesvirus infection|Herpes simplex infection|Complement and coagulation cascades	Classical Complement Pathway|Cells and Molecules involved in local acute inflammatory response|Complement Pathway|Alternative Complement Pathway|Lectin Induced Complement Pathway
773	CACNA1A	0	Eukaryotes	3.48837	10	3	100	101481	0.0065	2	59	Metabolism|Neuronal System	Integration of energy metabolism|Regulation of insulin secretion|Transmission across Chemical Synapses|Presynaptic depolarization and calcium channel opening	Environmental Information Processing|Human Diseases|Organismal Systems	Signal transduction|Endocrine and metabolic diseases|Substance dependence|Nervous system|Sensory system	MAPK signaling pathway|Calcium signaling pathway|Type II diabetes mellitus|Morphine addiction|Nicotine addiction|Synaptic vesicle cycle|Retrograde endocannabinoid signaling|Glutamatergic synapse|Cholinergic synapse|Serotonergic synapse|GABAergic synapse|Dopaminergic synapse|Long-term depression|Taste transduction	NA
948	CD36	0	Eukaryotes	0	41	9	22	5105	0.0996	16	20	Developmental Biology|Disease|Hemostasis|Immune System|Metabolism|Vesicle-mediated transport	Transcriptional regulation of white adipocyte differentiation|Diseases of Immune System|Diseases associated with the TLR signaling cascade|MyD88 deficiency (TLR2/4)|IRAK4 deficiency (TLR2/4)|Platelet activation, signaling and aggregation|Response to elevated platelet cytosolic Ca2+|Platelet degranulation |Cytokine Signaling in Immune system|Adaptive Immune System|Innate Immune System|Toll-Like Re…	Cellular Processes|Environmental Information Processing|Human Diseases|Organismal Systems	Transport and catabolism|Signaling molecules and interaction|Signal transduction|Endocrine and metabolic diseases|Infectious diseases: Parasitic|Digestive system|Endocrine system|Immune system	Phagosome|ECM-receptor interaction|AMPK signaling pathway|Insulin resistance|Malaria|Fat digestion and absorption|Cholesterol metabolism|PPAR signaling pathway|Adipocytokine signaling pathway|Hematopoietic cell lineage	TSP-1 Induced Apoptosis in Microvascular Endothelial Cell
1234	CCR5	1	Metazoans	0	25	NA	44	41310	0.0634	8	33	Disease|Immune System|Signal Transduction	Infectious disease|HIV Infection|HIV Life Cycle|Early Phase of HIV Life Cycle|Binding and entry of HIV virion|Cytokine Signaling in Immune system|Signaling by Interleukins|Interleukin-10 signaling|Signaling by GPCR|GPCR downstream signalling|GPCR ligand binding|Class A/1 (Rhodopsin-like receptors)|G alpha (i) signalling events|Peptide ligand-binding receptors|Chemokine receptors bind chemokines	Cellular Processes|Environmental Information Processing|Human Diseases|Organismal Systems	Transport and catabolism|Signaling molecules and interaction|Cancers: Overview|Infectious diseases: Parasitic|Infectious diseases: Viral|Immune system	Endocytosis|Cytokine-cytokine receptor interaction|Viral carcinogenesis|Toxoplasmosis|Kaposi's sarcoma-associated herpesvirus infection|Chemokine signaling pathway	IL12 and Stat4 Dependent Signaling Pathway in Th1 Development|HIV Induced T Cell Apoptosis|Pertussis toxin-insensitive CCR5 Signaling in Macrophage|NO2-dependent IL 12 Pathway in NK cells|Selective expression of chemokine receptors during T-cell polarization
1278	COL1A2	0	Last Universal Common Ancestor	0	43	43	45	20789	0.0768	39	30	Extracellular matrix organization|Hemostasis|Immune System|Signal Transduction|Vesicle-mediated transport	Degradation of the extracellular matrix|Collagen formation|Integrin cell surface interactions|Non-integrin membrane-ECM interactions|ECM proteoglycans|Collagen degradation|Collagen biosynthesis and modifying enzymes|Assembly of collagen fibrils and other multimeric structures|Syndecan interactions|Anchoring fibril formation|Crosslinking of collagen fibrils|Collagen chain trimerization|Cell surfac…	Cellular Processes|Environmental Information Processing|Human Diseases|Organismal Systems	Cellular community - eukaryotes|Signaling molecules and interaction|Signal transduction|Endocrine and metabolic diseases|Infectious diseases: Parasitic|Infectious diseases: Viral|Digestive system|Endocrine system|Immune system	Focal adhesion|ECM-receptor interaction|PI3K-Akt signaling pathway|AGE-RAGE signaling pathway in diabetic complications|Amoebiasis|Human papillomavirus infection|Protein digestion and absorption|Relaxin signaling pathway|Platelet activation	NA
1289	COL5A1	0	Last Universal Common Ancestor	1.76471	41	30	33	14442	0.1383	20	30	Developmental Biology|Extracellular matrix organization|Signal Transduction	Axon guidance|NCAM signaling for neurite out-growth|NCAM1 interactions|Degradation of the extracellular matrix|Collagen formation|Integrin cell surface interactions|Non-integrin membrane-ECM interactions|ECM proteoglycans|Collagen degradation|Collagen biosynthesis and modifying enzymes|Assembly of collagen fibrils and other multimeric structures|Syndecan interactions|Collagen chain trimerization|…	Organismal Systems	Digestive system	Protein digestion and absorption	NA
1294	COL7A1	0	Last Universal Common Ancestor	1.12994	36	0	21	3102	0.0857	21	2	Extracellular matrix organization|Metabolism of proteins|Vesicle-mediated transport	Degradation of the extracellular matrix|Collagen formation|Integrin cell surface interactions|Laminin interactions|Collagen degradation|Collagen biosynthesis and modifying enzymes|Assembly of collagen fibrils and other multimeric structures|Anchoring fibril formation|Collagen chain trimerization|Post-translational protein modification|Asparagine N-linked glycosylation|Transport to the Golgi and s…	Organismal Systems	Digestive system	Protein digestion and absorption	NA
1452	CSNK1A1	3	Last Universal Common Ancestor	30.814	43	40	139	68042	0.0781	12	72	Disease|Signal Transduction	Diseases of signal transduction|Signaling by WNT in cancer|AXIN mutants destabilize the destruction complex, activating WNT signaling|phosphorylation site mutants of CTNNB1 are not targeted to the proteasome by the destruction complex|truncated APC mutants destabilize the destruction complex|AMER1 mutants destabilize the destruction complex|Misspliced GSK3beta mutants stabilize beta-catenin|S33 m…	Environmental Information Processing|Human Diseases	Signal transduction|Cancers: Specific types|Infectious diseases: Viral	Wnt signaling pathway|Hedgehog signaling pathway|Breast cancer|Hepatocellular carcinoma|Gastric cancer|Human papillomavirus infection	NFAT and Hypertrophy of the heart (Transcription in the broken heart)
1549	CYP2A7	3	Last Universal Common Ancestor	0	2	1	2	16305	0	0	2	Metabolism	Biological oxidations|Phase I - Functionalization of compounds|Cytochrome P450 - arranged by substrate type|Fatty acids|Xenobiotics|CYP2E1 reactions	NA	NA	NA	NA
1559	CYP2C9	3	Last Universal Common Ancestor	0.564972	7	6	14	4532	0.1209	0	3	Metabolism	Biological oxidations|Metabolism of lipids|Phase I - Functionalization of compounds|Fatty acid metabolism|Cytochrome P450 - arranged by substrate type|Arachidonic acid metabolism|Xenobiotics|Synthesis of epoxy (EET) and dihydroxyeicosatrienoic acids (DHET)|Synthesis of (16-20)-hydroxyeicosatetraenoic acids (HETE)|CYP2E1 reactions	Human Diseases|Metabolism|Organismal Systems	Cancers: Overview|Global and overview maps|Lipid metabolism|Metabolism of cofactors and vitamins|Xenobiotics biodegradation and metabolism|Nervous system	Chemical carcinogenesis|Metabolic pathways|Arachidonic acid metabolism|Linoleic acid metabolism|Retinol metabolism|Metabolism of xenobiotics by cytochrome P450|Drug metabolism - cytochrome P450|Serotonergic synapse	Nuclear Receptors in Lipid Metabolism and Toxicity
1571	CYP2E1	0	Last Universal Common Ancestor	0	36	1	17	21910	0.0074	0	3	Metabolism	Biological oxidations|Phase I - Functionalization of compounds|Cytochrome P450 - arranged by substrate type|Xenobiotics|CYP2E1 reactions	Human Diseases|Metabolism	Cancers: Overview|Endocrine and metabolic diseases|Global and overview maps|Lipid metabolism|Xenobiotics biodegradation and metabolism	Chemical carcinogenesis|Non-alcoholic fatty liver disease (NAFLD)|Metabolic pathways|Steroid hormone biosynthesis|Arachidonic acid metabolism|Linoleic acid metabolism|Metabolism of xenobiotics by cytochrome P450|Drug metabolism - cytochrome P450|Drug metabolism - other enzymes	Mechanism of Acetaminophen Activity and Toxicity|Nuclear Receptors in Lipid Metabolism and Toxicity
1635	DCTD	0	Last Universal Common Ancestor	0.584795	43	44	11	938	0.0182	0	8	Metabolism	Metabolism of nucleotides|Interconversion of nucleotide di- and triphosphates	Metabolism	Global and overview maps|Nucleotide metabolism	Metabolic pathways|Pyrimidine metabolism	NA
1636	ACE	0	Last Universal Common Ancestor	0	40	11	9	424	0.1667	1	1	Metabolism of proteins	Peptide hormone metabolism|Metabolism of Angiotensinogen to Angiotensins	Human Diseases|Organismal Systems	Cardiovascular diseases|Infectious diseases: Parasitic|Endocrine system	Hypertrophic cardiomyopathy (HCM)|Chagas disease (American trypanosomiasis)|Renin-angiotensin system|Renin secretion	Angiotensin-converting enzyme 2 regulates heart function
1806	DPYD	0	Last Universal Common Ancestor	0	43	12	9	594	0	0	5	Metabolism	Metabolism of nucleotides|Nucleobase catabolism|Pyrimidine catabolism	Metabolism	Global and overview maps|Metabolism of cofactors and vitamins|Metabolism of other amino acids|Nucleotide metabolism|Xenobiotics biodegradation and metabolism	Metabolic pathways|Pantothenate and CoA biosynthesis|beta-Alanine metabolism|Pyrimidine metabolism|Drug metabolism - other enzymes	NA
1811	SLC26A3	0	Last Universal Common Ancestor	0	10	7	2	1	0	0	3	Disease|Transport of small molecules	Disorders of transmembrane transporters|SLC transporter disorders|Defective SLC26A3 causes congenital secretory chloride diarrhea 1 (DIAR1)|SLC-mediated transmembrane transport|Transport of inorganic cations/anions and amino acids/oligopeptides|Multifunctional anion exchangers	Organismal Systems	Digestive system	Pancreatic secretion|Mineral absorption	NA
1814	DRD3	0	Metazoans	0	1	NA	22	3498	0.0649	3	1	Signal Transduction	Signaling by GPCR|GPCR downstream signalling|GPCR ligand binding|Class A/1 (Rhodopsin-like receptors)|G alpha (i) signalling events|Amine ligand-binding receptors|Dopamine receptors	Environmental Information Processing|Organismal Systems	Signaling molecules and interaction|Nervous system	Neuroactive ligand-receptor interaction|Dopaminergic synapse	NA
1816	DRD5	5	Metazoans	0	1	1	5	50	0.1	3	1	Signal Transduction	Signaling by GPCR|GPCR downstream signalling|GPCR ligand binding|Class A/1 (Rhodopsin-like receptors)|G alpha (s) signalling events|Amine ligand-binding receptors|Dopamine receptors	Environmental Information Processing|Organismal Systems	Signaling molecules and interaction|Signal transduction|Nervous system	Neuroactive ligand-receptor interaction|Calcium signaling pathway|cAMP signaling pathway|Dopaminergic synapse	NA
1910	EDNRB	0	Metazoans	0	41	21	31	7863	0.0172	3	0	Signal Transduction	Signaling by GPCR|GPCR downstream signalling|GPCR ligand binding|Class A/1 (Rhodopsin-like receptors)|G alpha (q) signalling events|Peptide ligand-binding receptors	Environmental Information Processing|Human Diseases|Organismal Systems	Signaling molecules and interaction|Signal transduction|Cancers: Overview|Endocrine system	Neuroactive ligand-receptor interaction|Calcium signaling pathway|cGMP-PKG signaling pathway|Pathways in cancer|Melanogenesis|Relaxin signaling pathway	Role of EGF Receptor Transactivation by GPCRs in Cardiac Hypertrophy
2153	F5	0	Opisthokonts	0	17	0	17	3198	0.0441	7	4	Hemostasis|Metabolism of proteins|Vesicle-mediated transport	Formation of Fibrin Clot (Clotting Cascade)|Platelet activation, signaling and aggregation|Common Pathway of Fibrin Clot Formation|Response to elevated platelet cytosolic Ca2+|Platelet degranulation |Regulation of Insulin-like Growth Factor (IGF) transport and uptake by Insulin-like Growth Factor Binding Proteins (IGFBPs)|Post-translational protein modification|Asparagine N-linked glycosylation|P…	Organismal Systems	Immune system	Complement and coagulation cascades	Intrinsic Prothrombin Activation Pathway|Extrinsic Prothrombin Activation Pathway
2157	F8	0	Opisthokonts	0	43	43	19	9459	0.0994	7	0	Hemostasis|Metabolism of proteins|Vesicle-mediated transport	Formation of Fibrin Clot (Clotting Cascade)|Platelet activation, signaling and aggregation|Intrinsic Pathway of Fibrin Clot Formation|Common Pathway of Fibrin Clot Formation|Response to elevated platelet cytosolic Ca2+|Platelet degranulation |Post-translational protein modification|Asparagine N-linked glycosylation|Transport to the Golgi and subsequent modification|ER to Golgi Anterograde Transpo…	Organismal Systems	Immune system	Complement and coagulation cascades	Intrinsic Prothrombin Activation Pathway
2243	FGA	0	Last Universal Common Ancestor	0	9	8	30	3166	0.1402	36	5	Disease|Extracellular matrix organization|Hemostasis|Immune System|Metabolism of proteins|Signal Transduction	Diseases of signal transduction|Oncogenic MAPK signaling|Signaling by moderate kinase activity BRAF mutants|Signaling by high-kinase activity BRAF mutants|Signaling by RAS mutants|Signaling by BRAF and RAF fusions|Paradoxical activation of RAF signaling by kinase inactive BRAF|Integrin cell surface interactions|Formation of Fibrin Clot (Clotting Cascade)|Platelet activation, signaling and aggrega…	Organismal Systems	Immune system	Complement and coagulation cascades|Platelet activation	Fibrinolysis Pathway|Extrinsic Prothrombin Activation Pathway|Intrinsic Prothrombin Activation Pathway|Acute Myocardial Infarction
2538	G6PC	0	Metazoans	2.27273	5	23	4	32	0	0	53	Disease|Metabolism	Diseases of metabolism|Diseases of carbohydrate metabolism|Glycogen storage diseases|Glycogen storage disease type Ia (G6PC)|Metabolism of carbohydrates|Glucose metabolism|Gluconeogenesis	Environmental Information Processing|Human Diseases|Metabolism|Organismal Systems	Signal transduction|Endocrine and metabolic diseases|Carbohydrate metabolism|Global and overview maps|Digestive system|Endocrine system	FoxO signaling pathway|PI3K-Akt signaling pathway|AMPK signaling pathway|Insulin resistance|Glycolysis / Gluconeogenesis|Galactose metabolism|Starch and sucrose metabolism|Metabolic pathways|Carbohydrate digestion and absorption|Insulin signaling pathway|Adipocytokine signaling pathway|Glucagon signaling pathway	NA
2554	GABRA1	2	Metazoans	1.44928	1	4	10	323	0.2222	7	15	Neuronal System	Transmission across Chemical Synapses|Neurotransmitter receptors and postsynaptic signal transmission|GABA receptor activation|GABA A receptor activation	Environmental Information Processing|Human Diseases|Organismal Systems	Signaling molecules and interaction|Substance dependence|Nervous system|Sensory system	Neuroactive ligand-receptor interaction|Morphine addiction|Nicotine addiction|Retrograde endocannabinoid signaling|GABAergic synapse|Taste transduction	Cardiac Protection Against ROS |Gamma-aminobutyric Acid Receptor Life Cycle
2559	GABRA6	1	Metazoans	0	0	2	11	720	0.0182	1	0	Neuronal System	Transmission across Chemical Synapses|Neurotransmitter receptors and postsynaptic signal transmission|GABA receptor activation|GABA A receptor activation	Environmental Information Processing|Human Diseases|Organismal Systems	Signaling molecules and interaction|Substance dependence|Nervous system|Sensory system	Neuroactive ligand-receptor interaction|Morphine addiction|Nicotine addiction|Retrograde endocannabinoid signaling|GABAergic synapse|Taste transduction	Cardiac Protection Against ROS |Gamma-aminobutyric Acid Receptor Life Cycle
2561	GABRB2	1	Metazoans	0.564972	6	2	7	238	0.0952	6	32	Neuronal System	Transmission across Chemical Synapses|Neurotransmitter receptors and postsynaptic signal transmission|GABA receptor activation|GABA A receptor activation	Environmental Information Processing|Human Diseases|Organismal Systems	Signaling molecules and interaction|Substance dependence|Nervous system	Neuroactive ligand-receptor interaction|Morphine addiction|Nicotine addiction|Retrograde endocannabinoid signaling|Serotonergic synapse|GABAergic synapse	NA
2632	GBE1	0	Last Universal Common Ancestor	4.34783	43	44	27	3623	0.0256	0	0	Disease|Metabolism	Diseases of metabolism|Diseases of carbohydrate metabolism|Glycogen storage diseases|Glycogen storage disease type IV (GBE1)|Metabolism of carbohydrates|Glycogen metabolism|Glycogen synthesis	Metabolism	Carbohydrate metabolism|Global and overview maps	Starch and sucrose metabolism|Metabolic pathways	NA
2737	GLI3	0	Last Universal Common Ancestor	0	35	30	28	4521	0.0952	17	7	Gene expression (Transcription)|Signal Transduction	RNA Polymerase II Transcription|Generic Transcription Pathway|Transcriptional regulation by RUNX2|RUNX2 regulates bone development|RUNX2 regulates osteoblast differentiation|Signaling by Hedgehog|Hedgehog 'off' state|Hedgehog 'on' state|GLI3 is processed to GLI3R by the proteasome|GLI proteins bind promoters of Hh responsive genes to promote transcription	Environmental Information Processing|Human Diseases	Signal transduction|Cancers: Overview|Cancers: Specific types	cAMP signaling pathway|Hedgehog signaling pathway|Pathways in cancer|Basal cell carcinoma	Sonic Hedgehog (Shh) Pathway
2779	GNAT1	2	Eukaryotes	0	1	0	7	206	0.0476	9	31	Metabolism of proteins|Signal Transduction	Protein folding|Chaperonin-mediated protein folding|Cooperation of PDCL (PhLP1) and TRiC/CCT in G-protein beta folding|Signaling by GPCR|GPCR downstream signalling|G alpha (i) signalling events|Opioid Signalling|Visual phototransduction|G-protein mediated events|G-protein activation|The phototransduction cascade|PLC beta mediated events|Activation of the phototransduction cascade|Inactivation, re…	Organismal Systems	Sensory system	Phototransduction	NA
2891	GRIA2	0	Eukaryotes	0	12	4	35	4232	0.0487	10	2	Neuronal System	Transmission across Chemical Synapses|Neurotransmitter receptors and postsynaptic signal transmission|Glutamate binding, activation of AMPA receptors and synaptic plasticity|Activation of NMDA receptor and postsynaptic events|Activation of AMPA receptors|Trafficking of AMPA receptors|Unblocking of NMDA receptor, glutamate binding and activation|Trafficking of GluR2-containing AMPA receptors	Environmental Information Processing|Human Diseases|Organismal Systems	Signaling molecules and interaction|Signal transduction|Neurodegenerative diseases|Substance dependence|Environmental adaptation|Nervous system	Neuroactive ligand-receptor interaction|cAMP signaling pathway|Amyotrophic lateral sclerosis (ALS)|Cocaine addiction|Amphetamine addiction|Nicotine addiction|Circadian entrainment|Long-term potentiation|Retrograde endocannabinoid signaling|Glutamatergic synapse|Dopaminergic synapse|Long-term depression	FOSB gene expression and drug abuse
2892	GRIA3	0	Eukaryotes	0	16	4	25	4714	0.04	4	1	Neuronal System	Transmission across Chemical Synapses|Protein-protein interactions at synapses|Neurotransmitter receptors and postsynaptic signal transmission|Synaptic adhesion-like molecules|Glutamate binding, activation of AMPA receptors and synaptic plasticity|Activation of NMDA receptor and postsynaptic events|Activation of AMPA receptors|Trafficking of AMPA receptors|Unblocking of NMDA receptor, glutamate b…	Environmental Information Processing|Human Diseases|Organismal Systems	Signaling molecules and interaction|Signal transduction|Cancers: Overview|Substance dependence|Environmental adaptation|Nervous system	Neuroactive ligand-receptor interaction|cAMP signaling pathway|Transcriptional misregulation in cancer|Amphetamine addiction|Nicotine addiction|Circadian entrainment|Retrograde endocannabinoid signaling|Glutamatergic synapse|Dopaminergic synapse|Long-term depression	NA
2899	GRIK3	1	Eukaryotes	0	12	NA	2	99	0	2	52	Neuronal System	Transmission across Chemical Synapses|Neurotransmitter receptors and postsynaptic signal transmission|Activation of kainate receptors upon glutamate binding|Ionotropic activity of kainate receptors|Presynaptic function of Kainate receptors|Activation of Ca-permeable Kainate Receptor	Environmental Information Processing|Organismal Systems	Signaling molecules and interaction|Nervous system	Neuroactive ligand-receptor interaction|Glutamatergic synapse	NA
2906	GRIN2D	0	Metazoans	7.89474	3	NA	36	3578	0.0984	3	16	Neuronal System|Signal Transduction	Transmission across Chemical Synapses|Protein-protein interactions at synapses|Neurotransmitter receptors and postsynaptic signal transmission|Neurexins and neuroligins|Synaptic adhesion-like molecules|Activation of NMDA receptor and postsynaptic events|Post NMDA receptor activation events|Unblocking of NMDA receptor, glutamate binding and activation|CREB phosphorylation through the activation of…	Environmental Information Processing|Human Diseases|Organismal Systems	Signaling molecules and interaction|Signal transduction|Neurodegenerative diseases|Substance dependence|Environmental adaptation|Nervous system	Neuroactive ligand-receptor interaction|Calcium signaling pathway|cAMP signaling pathway|Alzheimer's disease|Amyotrophic lateral sclerosis (ALS)|Cocaine addiction|Amphetamine addiction|Nicotine addiction|Alcoholism|Circadian entrainment|Long-term potentiation|Glutamatergic synapse	Nitric Oxide Signaling Pathway
2908	NR3C1	0	Eukaryotes	1.12994	43	44	269	144354	0.0513	15	100	Cellular responses to external stimuli|Circadian Clock|Gene expression (Transcription)|Signal Transduction	Cellular responses to stress|HSP90 chaperone cycle for steroid hormone receptors (SHR)|BMAL1:CLOCK,NPAS2 activates circadian gene expression|RNA Polymerase II Transcription|Generic Transcription Pathway|Nuclear Receptor transcription pathway|Transcriptional regulation by RUNX2|Regulation of RUNX2 expression and activity|Signaling by Non-Receptor Tyrosine Kinases|Signaling by PTK6|PTK6 Expression	Environmental Information Processing	Signaling molecules and interaction	Neuroactive ligand-receptor interaction	Chromatin Remodeling by hSWI/SNF ATP-dependent Complexes|NFkB activation by Nontypeable Hemophilus influenzae|Visceral Fat Deposits and the Metabolic Syndrome|Corticosteroids and cardioprotection
2918	GRM8	2	Last Universal Common Ancestor	0	2	NA	4	122	0.1667	3	6	Signal Transduction	Signaling by GPCR|GPCR downstream signalling|GPCR ligand binding|G alpha (i) signalling events|Class C/3 (Metabotropic glutamate/pheromone receptors)	Environmental Information Processing|Organismal Systems	Signaling molecules and interaction|Signal transduction|Nervous system	Neuroactive ligand-receptor interaction|Phospholipase D signaling pathway|Glutamatergic synapse	NA
2977	GUCY1A2	0	Last Universal Common Ancestor	0.564972	26	43	12	542	0.2424	1	11	Hemostasis	Platelet homeostasis|Nitric oxide stimulates guanylate cyclase	Cellular Processes|Environmental Information Processing|Metabolism|Organismal Systems	Cellular community - eukaryotes|Signal transduction|Nucleotide metabolism|Circulatory system|Digestive system|Endocrine system|Environmental adaptation|Immune system|Nervous system	Gap junction|cGMP-PKG signaling pathway|Purine metabolism|Vascular smooth muscle contraction|Salivary secretion|Oxytocin signaling pathway|Renin secretion|Circadian entrainment|Platelet activation|Long-term depression	Ion Channels and Their Functional Role in Vascular Endothelium
2990	GUSB	0	Last Universal Common Ancestor	3.9548	43	35	11	2202	0.0364	0	4	Disease|Immune System|Metabolism	Diseases of metabolism|Diseases of carbohydrate metabolism|Mucopolysaccharidoses|MPS VII - Sly syndrome|Innate Immune System|Neutrophil degranulation|Metabolism of carbohydrates|Glycosaminoglycan metabolism|Heparan sulfate/heparin (HS-GAG) metabolism|Hyaluronan metabolism|HS-GAG degradation|Hyaluronan uptake and degradation	Cellular Processes|Metabolism	Transport and catabolism|Carbohydrate metabolism|Global and overview maps|Glycan biosynthesis and metabolism|Metabolism of cofactors and vitamins|Xenobiotics biodegradation and metabolism	Lysosome|Pentose and glucuronate interconversions|Metabolic pathways|Glycosaminoglycan degradation|Porphyrin and chlorophyll metabolism|Drug metabolism - other enzymes	NA
3073	HEXA	0	Last Universal Common Ancestor	0	43	30	37	3016	0.1051	1	56	Metabolism	Metabolism of lipids|Metabolism of carbohydrates|Glycosaminoglycan metabolism|Sphingolipid metabolism|Keratan sulfate/keratin metabolism|Glycosphingolipid metabolism|Chondroitin sulfate/dermatan sulfate metabolism|Hyaluronan metabolism|Keratan sulfate degradation|CS/DS degradation|Hyaluronan uptake and degradation	Cellular Processes|Metabolism	Transport and catabolism|Carbohydrate metabolism|Global and overview maps|Glycan biosynthesis and metabolism	Lysosome|Amino sugar and nucleotide sugar metabolism|Metabolic pathways|Other glycan degradation|Glycosaminoglycan degradation|Glycosphingolipid biosynthesis - globo and isoglobo series|Glycosphingolipid biosynthesis - ganglio series	NA
3082	HGF	0	Last Universal Common Ancestor	0	35	43	19	8235	0.0409	30	5	Disease|Hemostasis|Immune System|Signal Transduction	Diseases of signal transduction|PI3K/AKT Signaling in Cancer|Constitutive Signaling by Aberrant PI3K in Cancer|Platelet activation, signaling and aggregation|Response to elevated platelet cytosolic Ca2+|Platelet degranulation |Cytokine Signaling in Immune system|Signaling by Interleukins|Interleukin-7 signaling|Interleukin-4 and 13 signaling|MAPK family signaling cascades|Intracellular signaling …	Cellular Processes|Environmental Information Processing|Human Diseases	Cellular community - eukaryotes|Signaling molecules and interaction|Signal transduction|Cancers: Overview|Cancers: Specific types|Drug resistance: Antineoplastic|Infectious diseases: Parasitic	Focal adhesion|Cytokine-cytokine receptor interaction|MAPK signaling pathway|Ras signaling pathway|Rap1 signaling pathway|PI3K-Akt signaling pathway|Pathways in cancer|Proteoglycans in cancer|Renal cell carcinoma|Melanoma|Hepatocellular carcinoma|Gastric cancer|EGFR tyrosine kinase inhibitor resistance|Malaria	Signaling of Hepatocyte Growth Factor Receptor
3354	HTR1E	0	Metazoans	0	5	42	8	1010	0.0714	3	0	Signal Transduction	Signaling by GPCR|GPCR downstream signalling|GPCR ligand binding|Class A/1 (Rhodopsin-like receptors)|G alpha (i) signalling events|Amine ligand-binding receptors|Serotonin receptors	Environmental Information Processing|Organismal Systems	Signaling molecules and interaction|Signal transduction|Nervous system|Sensory system	Neuroactive ligand-receptor interaction|cAMP signaling pathway|Serotonergic synapse|Taste transduction	NA
3437	IFIT3	0	Last Universal Common Ancestor	0	43	33	70	43120	0.1429	1	27	Immune System	Cytokine Signaling in Immune system|Interferon Signaling|Interferon alpha/beta signaling	NA	NA	NA	NA
3481	IGF2	0	Vertebrates	0	41	1	24	19373	0.0507	13	46	Hemostasis|Metabolism of proteins|Signal Transduction	Platelet activation, signaling and aggregation|Response to elevated platelet cytosolic Ca2+|Platelet degranulation |Regulation of Insulin-like Growth Factor (IGF) transport and uptake by Insulin-like Growth Factor Binding Proteins (IGFBPs)|Signaling by Receptor Tyrosine Kinases|Signaling by Type 1 Insulin-like Growth Factor 1 Receptor (IGF1R)|IGF1R signaling cascade|IRS-related events triggered b…	Environmental Information Processing|Human Diseases	Signal transduction|Cancers: Overview|Cancers: Specific types	MAPK signaling pathway|Ras signaling pathway|PI3K-Akt signaling pathway|Pathways in cancer|Proteoglycans in cancer|Hepatocellular carcinoma	NA
3482	IGF2R	0	Opisthokonts	0	43	34	38	15286	0.091	17	70	Immune System|Vesicle-mediated transport	Innate Immune System|Neutrophil degranulation|Membrane Trafficking|trans-Golgi Network Vesicle Budding|Intra-Golgi and retrograde Golgi-to-ER traffic|Clathrin-mediated endocytosis|Clathrin derived vesicle budding|Retrograde transport at the Trans-Golgi-Network|Cargo recognition for clathrin-mediated endocytosis|Golgi Associated Vesicle Biogenesis	Cellular Processes	Transport and catabolism	Lysosome|Endocytosis	NA
3552	IL1A	0	Mammals	2.5641	8	NA	12	688	0.0303	6	14	Cellular responses to external stimuli|Immune System	Cellular responses to stress|Cellular Senescence|Senescence-Associated Secretory Phenotype (SASP)|Cytokine Signaling in Immune system|Signaling by Interleukins|Interleukin-1 family signaling|Interleukin-10 signaling|Interleukin-4 and 13 signaling|Interleukin-1 processing|Interleukin-1 signaling	Cellular Processes|Environmental Information Processing|Human Diseases|Organismal Systems	Cell growth and death|Signaling molecules and interaction|Signal transduction|Cardiovascular diseases|Endocrine and metabolic diseases|Immune diseases|Infectious diseases: Bacterial|Infectious diseases: Parasitic|Infectious diseases: Viral|Neurodegenerative diseases|Development|Immune system	Necroptosis|Cellular senescence|Cytokine-cytokine receptor interaction|MAPK signaling pathway|Fluid shear stress and atherosclerosis|Non-alcoholic fatty liver disease (NAFLD)|AGE-RAGE signaling pathway in diabetic complications|Type I diabetes mellitus|Inflammatory bowel disease (IBD)|Rheumatoid arthritis|Graft-versus-host disease|Salmonella infection|Pertussis|Tuberculosis|Leishmaniasis|Measles|…	Cells and Molecules involved in local acute inflammatory response|Cytokine Network|IL-10 Anti-inflammatory Signaling Pathway|Adhesion and Diapedesis of Lymphocytes|Cytokines and Inflammatory Response|Signal transduction through IL1R|Erythrocyte Differentiation Pathway|NF-kB Signaling Pathway|Adhesion and Diapedesis of Granulocytes|Stress Induction of HSP Regulation
3553	IL1B	0	Vertebrates	0.675676	22	NA	20	6633	0.0684	5	6	Immune System	Cytokine Signaling in Immune system|Innate Immune System|Signaling by Interleukins|C-type lectin receptors (CLRs)|Interleukin-1 family signaling|CLEC7A (Dectin-1) signaling|Interleukin-10 signaling|Interleukin-4 and 13 signaling|Interleukin-1 processing|CLEC7A/inflammasome pathway|Interleukin-1 signaling	Cellular Processes|Environmental Information Processing|Human Diseases|Organismal Systems	Cell growth and death|Signaling molecules and interaction|Signal transduction|Cardiovascular diseases|Drug resistance: Antineoplastic|Endocrine and metabolic diseases|Immune diseases|Infectious diseases: Bacterial|Infectious diseases: Parasitic|Infectious diseases: Viral|Neurodegenerative diseases|Development|Immune system|Sensory system	Necroptosis|Cytokine-cytokine receptor interaction|MAPK signaling pathway|NF-kappa B signaling pathway|TNF signaling pathway|Fluid shear stress and atherosclerosis|Antifolate resistance|Non-alcoholic fatty liver disease (NAFLD)|AGE-RAGE signaling pathway in diabetic complications|Type I diabetes mellitus|Inflammatory bowel disease (IBD)|Rheumatoid arthritis|Graft-versus-host disease|Salmonella in…	Msp/Ron Receptor Signaling Pathway|NFkB activation by Nontypeable Hemophilus influenzae|Signal transduction through IL1R|IL 5 Signaling Pathway
3561	IL2RG	0	Vertebrates	0	40	3	34	8084	0.098	30	0	Hemostasis|Immune System|Signal Transduction	Platelet activation, signaling and aggregation|GPVI-mediated activation cascade|Cytokine Signaling in Immune system|Signaling by Interleukins|Interleukin-7 signaling|Interleukin-2 family signaling|Interleukin-3, 5 and GM-CSF signaling|Interleukin-4 and 13 signaling|Interleukin-15 signaling|Interleukin-9 signaling|Interleukin-2 signaling|Interleukin-21 signaling|Interleukin receptor SHC signaling|…	Cellular Processes|Environmental Information Processing|Human Diseases|Organismal Systems	Transport and catabolism|Signaling molecules and interaction|Signal transduction|Cancers: Overview|Immune diseases|Infectious diseases: Viral|Immune system	Endocytosis|Cytokine-cytokine receptor interaction|PI3K-Akt signaling pathway|Jak-STAT signaling pathway|Pathways in cancer|Inflammatory bowel disease (IBD)|Primary immunodeficiency|Measles|HTLV-I infection|Th1 and Th2 cell differentiation|Th17 cell differentiation	IL 2 signaling pathway|IL-2 Receptor Beta Chain in T cell Activation|IL 4 signaling pathway
3566	IL4R	0	Vertebrates	1.13636	43	29	46	12491	0.0696	10	4	Immune System	Cytokine Signaling in Immune system|Signaling by Interleukins|Interleukin-4 and 13 signaling	Environmental Information Processing|Human Diseases|Organismal Systems	Signaling molecules and interaction|Signal transduction|Cancers: Overview|Immune diseases|Immune system	Cytokine-cytokine receptor interaction|PI3K-Akt signaling pathway|Jak-STAT signaling pathway|Pathways in cancer|Inflammatory bowel disease (IBD)|Hematopoietic cell lineage|Th1 and Th2 cell differentiation|Th17 cell differentiation	IL 4 signaling pathway|Th1/Th2 Differentiation|Selective expression of chemokine receptors during T-cell polarization
3676	ITGA4	0	Last Universal Common Ancestor	0	33	NA	512	329281	0.0552	29	1	Extracellular matrix organization|Gene expression (Transcription)|Hemostasis|Immune System	Integrin cell surface interactions|RNA Polymerase II Transcription|Generic Transcription Pathway|Transcriptional regulation by RUNX3|RUNX3 Regulates Immune Response and Cell Migration|Cell surface interactions at the vascular wall|Adaptive Immune System|Immunoregulatory interactions between a Lymphoid and a non-Lymphoid cell	Cellular Processes|Environmental Information Processing|Human Diseases|Organismal Systems	Cell motility|Cellular community - eukaryotes|Signaling molecules and interaction|Signal transduction|Cardiovascular diseases|Infectious diseases: Parasitic|Infectious diseases: Viral|Immune system	Regulation of actin cytoskeleton|Focal adhesion|ECM-receptor interaction|Cell adhesion molecules (CAMs)|PI3K-Akt signaling pathway|Hypertrophic cardiomyopathy (HCM)|Arrhythmogenic right ventricular cardiomyopathy (ARVC)|Dilated cardiomyopathy (DCM)|Leishmaniasis|Human papillomavirus infection|Hematopoietic cell lineage|Leukocyte transendothelial migration|Intestinal immune network for IgA product…	Cells and Molecules involved in local acute inflammatory response|Adhesion and Diapedesis of Lymphocytes|Adhesion Molecules on Lymphocyte|Monocyte and its Surface Molecules
3695	ITGB7	0	Metazoans	6.35838	37	NA	18	1284	0.1503	5	0	Extracellular matrix organization|Immune System	Integrin cell surface interactions|Adaptive Immune System|Immunoregulatory interactions between a Lymphoid and a non-Lymphoid cell	Cellular Processes|Environmental Information Processing|Human Diseases|Organismal Systems	Cell motility|Cellular community - eukaryotes|Signaling molecules and interaction|Signal transduction|Cancers: Overview|Cardiovascular diseases|Infectious diseases: Viral|Immune system	Regulation of actin cytoskeleton|Focal adhesion|ECM-receptor interaction|Cell adhesion molecules (CAMs)|PI3K-Akt signaling pathway|Transcriptional misregulation in cancer|Hypertrophic cardiomyopathy (HCM)|Arrhythmogenic right ventricular cardiomyopathy (ARVC)|Dilated cardiomyopathy (DCM)|Human papillomavirus infection|Intestinal immune network for IgA production	NA
4048	LTA4H	0	Last Universal Common Ancestor	0	43	44	24	3206	0.0797	0	6	Immune System|Metabolism	Innate Immune System|Neutrophil degranulation|Metabolism of lipids|Fatty acid metabolism|Arachidonic acid metabolism|Synthesis of Leukotrienes (LT) and Eoxins (EX)	Metabolism	Global and overview maps|Lipid metabolism	Metabolic pathways|Arachidonic acid metabolism	NA
4053	LTBP2	0	Vertebrates	0.675676	42	1	3	136	0.3333	1	33	Extracellular matrix organization	Elastic fibre formation|Molecules associated with elastic fibres	NA	NA	NA	NA
4353	MPO	0	Last Universal Common Ancestor	0.568182	9	1	6	272	0.0667	2	3	Immune System	Innate Immune System|Neutrophil degranulation	Cellular Processes|Human Diseases|Metabolism	Transport and catabolism|Cancers: Overview|Cancers: Specific types|Xenobiotics biodegradation and metabolism	Phagosome|Transcriptional misregulation in cancer|Acute myeloid leukemia|Drug metabolism - other enzymes	NA
4625	MYH7	5	Eukaryotes	1.69492	17	2	44	7468	0.0211	0	0	Vesicle-mediated transport	Membrane Trafficking|Translocation of GLUT4 to the plasma membrane	Environmental Information Processing|Human Diseases|Organismal Systems	Signal transduction|Cardiovascular diseases|Circulatory system	cGMP-PKG signaling pathway|Hypertrophic cardiomyopathy (HCM)|Dilated cardiomyopathy (DCM)|Viral myocarditis|Cardiac muscle contraction|Adrenergic signaling in cardiomyocytes	NA
4688	NCF2	0	Eukaryotes	0.568182	41	5	26	3529	0.0862	3	1	Cellular responses to external stimuli|Immune System|Signal Transduction	Cellular responses to stress|Detoxification of Reactive Oxygen Species|Adaptive Immune System|Innate Immune System|ROS, RNS production in phagocytes|Class I MHC mediated antigen processing & presentation|Antigen processing-Cross presentation|Cross-presentation of particulate exogenous antigens (phagosomes)|Signaling by Rho GTPases|Signaling by Receptor Tyrosine Kinases|Signaling by VEGF|RHO GTPas…	Cellular Processes|Human Diseases|Organismal Systems	Transport and catabolism|Cardiovascular diseases|Infectious diseases: Parasitic|Development|Immune system	Phagosome|Fluid shear stress and atherosclerosis|Leishmaniasis|Osteoclast differentiation|Leukocyte transendothelial migration	fMLP induced chemokine gene expression in HMC-1 cells|Rac 1 cell motility signaling pathway
4854	NOTCH3	0	Last Universal Common Ancestor	0	41	38	71	90884	0.0314	14	10	Disease|Gene expression (Transcription)|Signal Transduction	Diseases of glycosylation|Diseases associated with O-glycosylation of proteins|Defective LFNG causes SCDO3|RNA Polymerase II Transcription|Generic Transcription Pathway|Notch-HLH transcription pathway|Signaling by NOTCH|Pre-NOTCH Expression and Processing|Signaling by NOTCH3|Pre-NOTCH Processing in the Endoplasmic Reticulum|Pre-NOTCH Transcription and Translation|Pre-NOTCH Processing in Golgi|NOT…	Environmental Information Processing|Human Diseases|Organismal Systems	Signal transduction|Cancers: Overview|Cancers: Specific types|Drug resistance: Antineoplastic|Infectious diseases: Viral|Endocrine system|Immune system	Notch signaling pathway|Apelin signaling pathway|Pathways in cancer|MicroRNAs in cancer|Breast cancer|Endocrine resistance|Human papillomavirus infection|Thyroid hormone signaling pathway|Th1 and Th2 cell differentiation	NA
4915	NTRK2	0	Eukaryotes	0.564972	35	11	37	5415	0.1111	3	6	Signal Transduction	Signaling by Receptor Tyrosine Kinases|Signalling by NGF|NGF signalling via TRKA from the plasma membrane|Activation of TRKA receptors|NGF-independant TRKA activation	Environmental Information Processing|Human Diseases|Organismal Systems	Signal transduction|Substance dependence|Nervous system	MAPK signaling pathway|Ras signaling pathway|PI3K-Akt signaling pathway|Alcoholism|Neurotrophin signaling pathway	NA
4952	OCRL	0	Eukaryotes	0.564972	43	44	57	19364	0.0959	7	54	Metabolism|Signal Transduction|Vesicle-mediated transport	Inositol phosphate metabolism|Metabolism of lipids|Phospholipid metabolism|Synthesis of IP2, IP, and Ins in the cytosol|Synthesis of IP3 and IP4 in the cytosol|PI Metabolism|Synthesis of PIPs at the plasma membrane|Synthesis of PIPs at the Golgi membrane|Signaling by Rho GTPases|Rho GTPase cycle|Membrane Trafficking|trans-Golgi Network Vesicle Budding|Clathrin-mediated endocytosis|Clathrin derive…	Environmental Information Processing|Metabolism	Signal transduction|Carbohydrate metabolism|Global and overview maps	Phosphatidylinositol signaling system|Inositol phosphate metabolism|Metabolic pathways	NA
5162	PDHB	0	Last Universal Common Ancestor	1.69492	43	41	76	19437	0.0768	4	45	Metabolism|Signal Transduction	The citric acid (TCA) cycle and respiratory electron transport|Metabolism of amino acids and derivatives|Glyoxylate metabolism and glycine degradation|Pyruvate metabolism and Citric Acid (TCA) cycle|Pyruvate metabolism|Regulation of pyruvate dehydrogenase (PDH) complex|Signaling by Nuclear Receptors|Signaling by Retinoic Acid	Environmental Information Processing|Human Diseases|Metabolism|Organismal Systems	Signal transduction|Cancers: Overview|Carbohydrate metabolism|Global and overview maps|Endocrine system	HIF-1 signaling pathway|Central carbon metabolism in cancer|Glycolysis / Gluconeogenesis|Citrate cycle (TCA cycle)|Pyruvate metabolism|Metabolic pathways|Carbon metabolism|Glucagon signaling pathway	NA
5241	PGR	0	Eukaryotes	0	23	5	76	9007	0.1165	5	3	Cellular responses to external stimuli|Gene expression (Transcription)|Signal Transduction	Cellular responses to stress|HSP90 chaperone cycle for steroid hormone receptors (SHR)|RNA Polymerase II Transcription|Generic Transcription Pathway|Nuclear Receptor transcription pathway|Signaling by Receptor Tyrosine Kinases|Signaling by ERBB4|Nuclear signaling by ERBB4	Cellular Processes|Human Diseases|Organismal Systems	Cell growth and death|Cancers: Specific types|Endocrine system	Oocyte meiosis|Breast cancer|Progesterone-mediated oocyte maturation	How Progesterone Initiates the Oocyte Maturation
5243	ABCB1	0	Last Universal Common Ancestor	0.564972	38	11	19	2242	0.0702	0	14	Metabolism|Transport of small molecules	Abacavir transport and metabolism|Abacavir transmembrane transport|ABC-family proteins mediated transport	Environmental Information Processing|Human Diseases|Organismal Systems	Membrane transport|Cancers: Overview|Cancers: Specific types|Digestive system	ABC transporters|MicroRNAs in cancer|Gastric cancer|Bile secretion	Multi-Drug Resistance Factors|Nuclear Receptors in Lipid Metabolism and Toxicity|Hypoxia and p53 in the Cardiovascular system
5265	SERPINA1	0	Last Universal Common Ancestor	0	42	10	52	28214	0.0354	9	18	Hemostasis|Immune System|Metabolism of proteins|Vesicle-mediated transport	Platelet activation, signaling and aggregation|Response to elevated platelet cytosolic Ca2+|Platelet degranulation |Innate Immune System|Neutrophil degranulation|Regulation of Insulin-like Growth Factor (IGF) transport and uptake by Insulin-like Growth Factor Binding Proteins (IGFBPs)|Post-translational protein modification|Asparagine N-linked glycosylation|Post-translational protein phosphorylat…	Organismal Systems	Immune system	Complement and coagulation cascades	NA
5530	PPP3CA	2	Last Universal Common Ancestor	0	43	31	82	35281	0.0407	12	3	Immune System|Signal Transduction	Adaptive Immune System|Innate Immune System|Fc epsilon receptor (FCERI) signaling|C-type lectin receptors (CLRs)|Signaling by the B Cell Receptor (BCR)|Downstream signaling events of B Cell Receptor (BCR)|FCERI mediated Ca+2 mobilization|CLEC7A (Dectin-1) signaling|Calcineurin activates NFAT|CLEC7A (Dectin-1) induces NFAT activation|Signaling by WNT|Signaling by GPCR|Beta-catenin independent WNT …	Cellular Processes|Environmental Information Processing|Human Diseases|Organismal Systems	Cell growth and death|Signal transduction|Infectious diseases: Bacterial|Infectious diseases: Viral|Neurodegenerative diseases|Substance dependence|Development|Endocrine system|Immune system|Nervous system	Oocyte meiosis|Cellular senescence|MAPK signaling pathway|Calcium signaling pathway|cGMP-PKG signaling pathway|Wnt signaling pathway|VEGF signaling pathway|Tuberculosis|HTLV-I infection|Kaposi's sarcoma-associated herpesvirus infection|Alzheimer's disease|Amyotrophic lateral sclerosis (ALS)|Amphetamine addiction|Axon guidance|Osteoclast differentiation|Oxytocin signaling pathway|Glucagon signalin…	Signaling Pathway from G-Protein Families|Endocytotic role of NDK, Phosphins and Dynamin|Effects of calcineurin in Keratinocyte Differentiation|Nitric Oxide Signaling Pathway|Neuropeptides VIP and PACAP inhibit the apoptosis of activated T cells|Fc Epsilon Receptor I Signaling in Mast Cells|Control of skeletal myogenesis by HDAC & calcium/calmodulin-dependent kinase (CaMK)|Role of MEF2D in T-cell…
5618	PRLR	0	Metazoans	0	24	NA	21	2689	0.1	8	53	Immune System	Cytokine Signaling in Immune system|Prolactin receptor signaling|Growth hormone receptor signaling	Environmental Information Processing|Organismal Systems	Signaling molecules and interaction|Signal transduction|Endocrine system	Cytokine-cytokine receptor interaction|Neuroactive ligand-receptor interaction|PI3K-Akt signaling pathway|Jak-STAT signaling pathway|Prolactin signaling pathway	NA
5737	PTGFR	0	Vertebrates	0.564972	29	NA	16	886	0.0417	2	2	Signal Transduction	Signaling by GPCR|GPCR downstream signalling|GPCR ligand binding|Class A/1 (Rhodopsin-like receptors)|G alpha (q) signalling events|Eicosanoid ligand-binding receptors|Prostanoid ligand receptors	Environmental Information Processing	Signaling molecules and interaction|Signal transduction	Neuroactive ligand-receptor interaction|Calcium signaling pathway|Phospholipase D signaling pathway	Eicosanoid Metabolism
5896	RAG1	0	Metazoans	2.27273	5	NA	33	3776	0.125	3	23	Immune System|Signal Transduction	Cytokine Signaling in Immune system|Signaling by Interleukins|Interleukin-7 signaling|MAPK family signaling cascades|MAPK6/MAPK4 signaling	Environmental Information Processing|Human Diseases	Signal transduction|Immune diseases	FoxO signaling pathway|Primary immunodeficiency	NA
5897	RAG2	0	Vertebrates	0	2	NA	5	6	0.4	3	0	Immune System|Signal Transduction	Cytokine Signaling in Immune system|Signaling by Interleukins|Interleukin-7 signaling|MAPK family signaling cascades|MAPK6/MAPK4 signaling	Environmental Information Processing|Human Diseases	Signal transduction|Immune diseases	FoxO signaling pathway|Primary immunodeficiency	NA
6103	RPGR	0	Last Universal Common Ancestor	0	42	40	51	4823	0.0659	1	1	NA	NA	NA	NA	NA	NA
6239	RREB1	0	Last Universal Common Ancestor	6.39535	43	40	14	2014	0.2308	4	134	NA	NA	NA	NA	NA	NA
6261	RYR1	0	Last Universal Common Ancestor	0.564972	19	2	20	2296	0.0789	1	0	Muscle contraction|Transport of small molecules	Cardiac conduction|Ion homeostasis|Ion channel transport|Stimuli-sensing channels	Environmental Information Processing|Organismal Systems	Signal transduction|Endocrine system|Environmental adaptation|Nervous system	Calcium signaling pathway|Apelin signaling pathway|Oxytocin signaling pathway|Circadian entrainment|Long-term depression	NA
6310	ATXN1	0	Last Universal Common Ancestor	6.25	43	44	260	357786	0.0148	1	134	NA	NA	NA	NA	NA	NA
6331	SCN5A	0	Eukaryotes	7.48299	5	NA	30	4940	0.0506	2	1	Developmental Biology|Muscle contraction	Axon guidance|L1CAM interactions|Interaction between L1 and Ankyrins|Cardiac conduction|Phase 0 - rapid depolarisation	Organismal Systems	Circulatory system	Adrenergic signaling in cardiomyocytes	NA
6701	SPRR2B	6	Primates	13.6364	3	NA	0	0	NA	3	0	Developmental Biology	Keratinization|Formation of the cornified envelope	NA	NA	NA	NA
6890	TAP1	0	Last Universal Common Ancestor	0.595238	41	44	45	8785	0.0879	6	2	Immune System	Adaptive Immune System|Class I MHC mediated antigen processing & presentation|Antigen processing-Cross presentation|Antigen Presentation: Folding, assembly and peptide loading of class I MHC|ER-Phagosome pathway	Cellular Processes|Environmental Information Processing|Human Diseases|Organismal Systems	Transport and catabolism|Membrane transport|Immune diseases|Infectious diseases: Viral|Immune system	Phagosome|ABC transporters|Primary immunodeficiency|Herpes simplex infection|Antigen processing and presentation	Antigen Processing and Presentation
6928	HNF1B	0	Metazoans	1.12994	18	16	6	34	0.4667	0	4	Developmental Biology	Regulation of beta-cell development|Regulation of gene expression in late stage (branching morphogenesis) pancreatic bud precursor cells|Regulation of gene expression in early pancreatic precursor cells	Human Diseases	Endocrine and metabolic diseases	Maturity onset diabetes of the young	NA
7051	TGM1	0	Metazoans	2.04082	34	5	36	17382	0.0635	3	2	Developmental Biology	Keratinization|Formation of the cornified envelope	NA	NA	NA	NA
7124	TNF	0	Vertebrates	0	3	NA	123	80297	0.0468	18	10	Developmental Biology|Immune System|Signal Transduction	Transcriptional regulation of white adipocyte differentiation|Cytokine Signaling in Immune system|Signaling by Interleukins|TNFR2 non-canonical NF-kB pathway|Interleukin-10 signaling|Interleukin-4 and 13 signaling|Death Receptor Signalling|TNF signaling|TNFR1-induced proapoptotic signaling|Regulation of TNFR1 signaling|TNFR1-induced NFkappaB signaling pathway|TNFR1-mediated ceramide production	Cellular Processes|Environmental Information Processing|Human Diseases|Organismal Systems	Cell growth and death|Signaling molecules and interaction|Signal transduction|Cancers: Overview|Cardiovascular diseases|Drug resistance: Antineoplastic|Endocrine and metabolic diseases|Immune diseases|Infectious diseases: Bacterial|Infectious diseases: Parasitic|Infectious diseases: Viral|Neurodegenerative diseases|Development|Endocrine system|Immune system	Apoptosis|Necroptosis|Cytokine-cytokine receptor interaction|MAPK signaling pathway|NF-kappa B signaling pathway|Sphingolipid signaling pathway|mTOR signaling pathway|TGF-beta signaling pathway|TNF signaling pathway|Proteoglycans in cancer|Hypertrophic cardiomyopathy (HCM)|Dilated cardiomyopathy (DCM)|Fluid shear stress and atherosclerosis|Antifolate resistance|Type II diabetes mellitus|Insulin r…	Cytokines and Inflammatory Response|Msp/Ron Receptor Signaling Pathway|NF-kB Signaling Pathway|Free Radical Induced Apoptosis|Chaperones modulate interferon Signaling Pathway|TNFR1 Signaling Pathway|Acetylation and Deacetylation of RelA in The Nucleus|Cytokine Network|SODD/TNFR1 Signaling Pathway|TNF/Stress Related Signaling|Cadmium induces DNA synthesis and proliferation in macrophages|Adhesion …
7159	TP53BP2	0	Metazoans	0	43	44	124	40040	0.0833	4	6	Gene expression (Transcription)|Programmed Cell Death	RNA Polymerase II Transcription|Generic Transcription Pathway|Transcriptional Regulation by TP53|Regulation of TP53 Activity|TP53 Regulates Transcription of Cell Death Genes|TP53 Regulates Transcription of Genes Involved in Cytochrome C Release|TP53 regulates transcription of several additional cell death genes whose specific roles in p53-dependent apoptosis remain uncertain|TP53 Regulates Transc…	Environmental Information Processing	Signal transduction	Hippo signaling pathway	NA
7306	TYRP1	0	Eukaryotes	0.675676	10	1	8	1362	0.0714	1	30	Metabolism	Metabolism of amino acids and derivatives|Melanin biosynthesis	Metabolism|Organismal Systems	Amino acid metabolism|Global and overview maps|Endocrine system	Tyrosine metabolism|Metabolic pathways|Melanogenesis	NA
7450	VWF	0	Metazoans	0.564972	41	5	21	10454	0.0762	35	0	Disease|Extracellular matrix organization|Hemostasis|Signal Transduction	Diseases of signal transduction|Oncogenic MAPK signaling|Signaling by moderate kinase activity BRAF mutants|Signaling by high-kinase activity BRAF mutants|Signaling by RAS mutants|Signaling by BRAF and RAF fusions|Paradoxical activation of RAF signaling by kinase inactive BRAF|Integrin cell surface interactions|Formation of Fibrin Clot (Clotting Cascade)|Platelet Adhesion to exposed collagen|Plat…	Cellular Processes|Environmental Information Processing|Human Diseases|Organismal Systems	Cellular community - eukaryotes|Signaling molecules and interaction|Signal transduction|Infectious diseases: Viral|Immune system	Focal adhesion|ECM-receptor interaction|PI3K-Akt signaling pathway|Human papillomavirus infection|Complement and coagulation cascades|Platelet activation	NA
7812	CSDE1	0	Eukaryotes	10.3448	43	44	57	22620	0.141	1	66	NA	NA	NA	NA	NA	NA
8200	GDF5	0	Metazoans	3.46821	3	NA	31	8999	0.0237	1	5	Extracellular matrix organization	Elastic fibre formation|Molecules associated with elastic fibres	Environmental Information Processing	Signaling molecules and interaction|Signal transduction	Cytokine-cytokine receptor interaction|TGF-beta signaling pathway|Hippo signaling pathway	NA
8502	PKP4	0	Eukaryotes	1.12994	43	38	52	28203	0.0475	5	4	Developmental Biology	Keratinization|Formation of the cornified envelope	NA	NA	NA	NA
8703	B4GALT3	0	Last Universal Common Ancestor	21.7391	43	38	33	15496	0.053	0	4	Metabolism|Metabolism of proteins	Metabolism of carbohydrates|Glycosaminoglycan metabolism|Keratan sulfate/keratin metabolism|Keratan sulfate biosynthesis|Post-translational protein modification|Asparagine N-linked glycosylation|Transport to the Golgi and subsequent modification|N-glycan antennae elongation in the medial/trans-Golgi|N-Glycan antennae elongation	Metabolism	Global and overview maps|Glycan biosynthesis and metabolism	Metabolic pathways|N-Glycan biosynthesis|Other types of O-glycan biosynthesis|Mannose type O-glycan biosynthesis|Glycosaminoglycan biosynthesis - keratan sulfate|Glycosphingolipid biosynthesis - lacto and neolacto series	NA
9500	MAGED1	0	Last Universal Common Ancestor	0	43	NA	126	60932	0.0491	0	4	Programmed Cell Death|Signal Transduction	Apoptosis|Caspase activation via extrinsic apoptotic signalling pathway|Ligand-independent caspase activation via DCC|Signaling by Receptor Tyrosine Kinases|Signalling by NGF|p75 NTR receptor-mediated signalling|Cell death signalling via NRAGE, NRIF and NADE|NRAGE signals death through JNK	Organismal Systems	Nervous system	Neurotrophin signaling pathway	NA
10051	SMC4	0	Last Universal Common Ancestor	38.7283	42	44	59	5311	0.1385	17	20	Cell Cycle	Cell Cycle, Mitotic|M Phase|Mitotic Prophase|Mitotic Prometaphase|Condensation of Prophase Chromosomes|Condensation of Prometaphase Chromosomes	NA	NA	NA	NA
10057	ABCC5	0	Last Universal Common Ancestor	0	43	19	11	2387	0	0	51	Metabolism|Transport of small molecules	Metabolism of carbohydrates|Glycosaminoglycan metabolism|Hyaluronan metabolism|Hyaluronan biosynthesis and export|ABC-family proteins mediated transport	Environmental Information Processing|Human Diseases	Membrane transport|Drug resistance: Antineoplastic	ABC transporters|Antifolate resistance	NA
10548	TM9SF1	0	Eukaryotes	1.22699	43	43	8	301	0.0357	0	21	NA	NA	NA	NA	NA	NA
10600	USP16	0	Eukaryotes	0.564972	43	37	30	11948	0.0621	1	10	Metabolism of proteins	Post-translational protein modification|Deubiquitination|Ub-specific processing proteases	NA	NA	NA	NA
11152	WDR45	1	Last Universal Common Ancestor	1.36054	43	NA	17	3069	0.0956	1	1	Cellular responses to external stimuli	Macroautophagy	NA	NA	NA	NA
11338	U2AF2	0	Eukaryotes	80.226	43	44	379	167330	0.0926	22	56	Gene expression (Transcription)|Metabolism of RNA	RNA Polymerase II Transcription|RNA Polymerase II Transcription Termination|Cleavage of Growing Transcript in the Termination Region |Processing of Capped Intron-Containing Pre-mRNA|mRNA Splicing|mRNA 3'-end processing|Transport of Mature Transcript to Cytoplasm|Transport of Mature mRNA derived from an Intron-Containing Transcript|mRNA Splicing - Major Pathway	Genetic Information Processing	Transcription	Spliceosome	NA
22861	NLRP1	0	Metazoans	0	42	35	22	8592	0.1039	4	1	Immune System	Innate Immune System|Nucleotide-binding domain, leucine rich repeat containing receptor (NLR) signaling pathways|Inflammasomes|The NLRP1 inflammasome	Organismal Systems	Immune system	NOD-like receptor signaling pathway	NA
22925	PLA2R1	0	Vertebrates	0	36	1	2	8	0	0	0	Metabolism	Metabolism of lipids|Phospholipid metabolism|Glycerophospholipid biosynthesis|Acyl chain remodelling of PC|Acyl chain remodelling of PS|Acyl chain remodelling of PE|Acyl chain remodelling of PI|Acyl chain remodelling of PG|Synthesis of PA	Cellular Processes|Human Diseases	Transport and catabolism|Infectious diseases: Bacterial	Phagosome|Tuberculosis	NA
26338	OR5L2	1	Mammals	0	0	NA	0	0	NA	1	0	Signal Transduction	Signaling by GPCR|GPCR downstream signalling|G alpha (s) signalling events|Olfactory Signaling Pathway	Organismal Systems	Sensory system	Olfactory transduction	NA
29086	BABAM1	0	Metazoans	1.44928	43	44	62	13662	0.0672	6	3	Cell Cycle|DNA Repair|Metabolism of proteins	Cell Cycle Checkpoints|G2/M Checkpoints|G2/M DNA damage checkpoint|DNA Double-Strand Break Repair|Homology Directed Repair|Nonhomologous End-Joining (NHEJ)|DNA Double Strand Break Response|Recruitment and ATM-mediated phosphorylation of repair and signaling proteins at DNA double strand breaks|HDR through Homologous Recombination (HR) or Single Strand Annealing (SSA)|Processing of DNA double-stra…	Genetic Information Processing	Replication and repair	Homologous recombination	NA
54437	SEMA5B	0	Opisthokonts	0.680272	17	6	9	145	0	0	0	Disease|Metabolism of proteins	Diseases of glycosylation|Diseases associated with O-glycosylation of proteins|Defective B3GALTL causes Peters-plus syndrome (PpS)|Post-translational protein modification|O-linked glycosylation|O-glycosylation of TSR domain-containing proteins	Organismal Systems	Development	Axon guidance	NA
57198	ATP8B2	0	Last Universal Common Ancestor	0.564972	42	34	15	1524	0.0095	0	30	Transport of small molecules	Ion channel transport|Ion transport by P-type ATPases	NA	NA	NA	NA
79473	OR52N1	4	Vertebrates	0	0	NA	0	0	NA	1	0	Signal Transduction	Signaling by GPCR|GPCR downstream signalling|G alpha (s) signalling events|Olfactory Signaling Pathway	Organismal Systems	Sensory system	Olfactory transduction	NA
79544	OR4K1	6	Mammals	2.27273	0	NA	0	0	NA	1	0	Signal Transduction	Signaling by GPCR|GPCR downstream signalling|G alpha (s) signalling events|Olfactory Signaling Pathway	Organismal Systems	Sensory system	Olfactory transduction	NA
81309	OR4C15	0	Mammals	0	0	NA	0	0	NA	1	0	Signal Transduction	Signaling by GPCR|GPCR downstream signalling|G alpha (s) signalling events|Olfactory Signaling Pathway	Organismal Systems	Sensory system	Olfactory transduction	NA
81327	OR4A16	15	Mammals	4.54545	0	NA	0	0	NA	1	0	Signal Transduction	Signaling by GPCR|GPCR downstream signalling|G alpha (s) signalling events|Olfactory Signaling Pathway	Organismal Systems	Sensory system	Olfactory transduction	NA
81614	NIPA2	1	Eukaryotes	0.564972	43	35	2	4	0	0	24	Transport of small molecules	Miscellaneous transport and binding events	NA	NA	NA	NA
84461	NEURL4	0	Metazoans	10.3659	43	38	60	9985	0.078	0	25	NA	NA	NA	NA	NA	NA
89795	NAV3	0	Metazoans	0	28	36	4	11	0.3333	0	2	NA	NA	NA	NA	NA	NA
91351	DDX60L	0	Last Universal Common Ancestor	1.44928	40	42	4	515	0	0	0	NA	NA	NA	NA	NA	NA
92335	STRADA	0	Eukaryotes	18.9189	43	43	10	1489	0.2	3	0	Signal Transduction	mTOR signalling|Energy dependent regulation of mTOR by LKB1-AMPK	Environmental Information Processing	Signal transduction	mTOR signaling pathway|AMPK signaling pathway	NA
119548	PNLIPRP3	0	Mammals	0	2	NA	0	0	NA	0	1	Digestion and absorption	Digestion|Digestion of dietary lipid	Metabolism	Global and overview maps|Lipid metabolism	Metabolic pathways|Glycerolipid metabolism	NA
119749	OR4C46	12	Mammals	0	0	NA	0	0	NA	1	0	Signal Transduction	Signaling by GPCR|GPCR downstream signalling|G alpha (s) signalling events|Olfactory Signaling Pathway	Organismal Systems	Sensory system	Olfactory transduction	NA
121364	OR10A7	0	Metazoans	11.3636	0	NA	0	0	NA	1	0	Signal Transduction	Signaling by GPCR|GPCR downstream signalling|G alpha (s) signalling events|Olfactory Signaling Pathway	Organismal Systems	Sensory system	Olfactory transduction	NA
122740	OR4K14	0	Vertebrates	0	0	NA	0	0	NA	1	0	Signal Transduction	Signaling by GPCR|GPCR downstream signalling|G alpha (s) signalling events|Olfactory Signaling Pathway	Organismal Systems	Sensory system	Olfactory transduction	NA
122742	OR4L1	0	Mammals	0	0	NA	0	0	NA	1	0	Signal Transduction	Signaling by GPCR|GPCR downstream signalling|G alpha (s) signalling events|Olfactory Signaling Pathway	Organismal Systems	Sensory system	Olfactory transduction	NA
125061	AFMID	0	Last Universal Common Ancestor	2.82486	43	10	5	1116	0.1	0	15	Metabolism	Metabolism of amino acids and derivatives|Histidine, lysine, phenylalanine, tyrosine, proline and tryptophan catabolism|Tryptophan catabolism	Metabolism	Amino acid metabolism|Carbohydrate metabolism|Global and overview maps	Tryptophan metabolism|Glyoxylate and dicarboxylate metabolism|Metabolic pathways	NA
125963	OR1M1	0	Primates	0	0	NA	0	0	NA	1	0	Signal Transduction	Signaling by GPCR|GPCR downstream signalling|G alpha (s) signalling events|Olfactory Signaling Pathway	Organismal Systems	Sensory system	Olfactory transduction	NA
127074	OR2T4	4	Vertebrates	0	0	NA	0	0	NA	1	0	Signal Transduction	Signaling by GPCR|GPCR downstream signalling|G alpha (s) signalling events|Olfactory Signaling Pathway	Organismal Systems	Sensory system	Olfactory transduction	NA
135924	OR9A2	3	Mammals	0	0	NA	0	0	NA	1	0	Signal Transduction	Signaling by GPCR|GPCR downstream signalling|G alpha (s) signalling events|Olfactory Signaling Pathway	Organismal Systems	Sensory system	Olfactory transduction	NA
140836	BANF2	0	Mammals	0	1	1	0	0	NA	4	0	NA	NA	NA	NA	NA	NA
157855	KCNU1	0	Eukaryotes	0	1	NA	0	0	NA	0	0	Reproduction	Fertilization|Sperm Motility And Taxes	Environmental Information Processing|Organismal Systems	Signal transduction|Circulatory system|Endocrine system	cGMP-PKG signaling pathway|Vascular smooth muscle contraction|Insulin secretion	NA
158399	ZNF483	0	Last Universal Common Ancestor	1.12994	23	NA	29	13486	0.1182	1	12	Gene expression (Transcription)	RNA Polymerase II Transcription|Generic Transcription Pathway	NA	NA	NA	NA
219432	OR4C6	9	Mammals	0	0	NA	0	0	NA	1	0	Signal Transduction	Signaling by GPCR|GPCR downstream signalling|G alpha (s) signalling events|Olfactory Signaling Pathway	Organismal Systems	Sensory system	Olfactory transduction	NA
219437	OR5L1	2	Mammals	6.06061	NA	NA	0	0	NA	1	0	Signal Transduction	Signaling by GPCR|GPCR downstream signalling|G alpha (s) signalling events|Olfactory Signaling Pathway	Organismal Systems	Sensory system	Olfactory transduction	NA
219527	LRRC55	0	Last Universal Common Ancestor	3.97727	6	39	0	0	NA	0	64	NA	NA	NA	NA	NA	NA
219870	OR10G9	3	Mammals	0	0	NA	0	0	NA	1	0	Signal Transduction	Signaling by GPCR|GPCR downstream signalling|G alpha (s) signalling events|Olfactory Signaling Pathway	Organismal Systems	Sensory system	Olfactory transduction	NA
219965	OR5B17	5	Mammals	0	0	NA	0	0	NA	1	0	Signal Transduction	Signaling by GPCR|GPCR downstream signalling|G alpha (s) signalling events|Olfactory Signaling Pathway	Organismal Systems	Sensory system	Olfactory transduction	NA
221061	FAM171A1	0	Vertebrates	0	41	44	7	551	0.0952	0	4	NA	NA	NA	NA	NA	NA
282770	OR10AG1	0	Vertebrates	0	0	NA	0	0	NA	1	0	Signal Transduction	Signaling by GPCR|GPCR downstream signalling|G alpha (s) signalling events|Olfactory Signaling Pathway	Organismal Systems	Sensory system	Olfactory transduction	NA
283092	OR4C13	11	Primates	11.4286	0	NA	0	0	NA	1	0	Signal Transduction	Signaling by GPCR|GPCR downstream signalling|G alpha (s) signalling events|Olfactory Signaling Pathway	Organismal Systems	Sensory system	Olfactory transduction	NA
285382	C3orf70	0	Vertebrates	1.44928	34	NA	1	0	0	0	16	NA	NA	NA	NA	NA	NA
338645	LUZP2	0	Vertebrates	0	2	2	0	0	NA	0	38	NA	NA	NA	NA	NA	NA
343066	AADACL4	0	Last Universal Common Ancestor	0	0	NA	0	0	NA	0	0	NA	NA	NA	NA	NA	NA
343171	OR2W3	1	Mammals	0	7	NA	1	0	0	1	0	Signal Transduction	Signaling by GPCR|GPCR downstream signalling|G alpha (s) signalling events|Olfactory Signaling Pathway	Organismal Systems	Sensory system	Olfactory transduction	NA
343406	OR10R2	1	Mammals	0	0	40	0	0	NA	1	0	Signal Transduction	Signaling by GPCR|GPCR downstream signalling|G alpha (s) signalling events|Olfactory Signaling Pathway	Organismal Systems	Sensory system	Olfactory transduction	NA
388633	LDLRAD1	0	Vertebrates	0	5	1	15	6495	0.0095	0	0	NA	NA	NA	NA	NA	NA
388697	HRNR	2	Mammals	0	0	NA	33	3028	0.1439	0	45	Immune System	Innate Immune System|Neutrophil degranulation	NA	NA	NA	NA
390064	OR51I2	2	Mammals	0	0	NA	0	0	NA	1	0	Signal Transduction	Signaling by GPCR|GPCR downstream signalling|G alpha (s) signalling events|Olfactory Signaling Pathway	Organismal Systems	Sensory system	Olfactory transduction	NA
390079	OR52E8	7	Mammals	0	0	NA	0	0	NA	1	0	Signal Transduction	Signaling by GPCR|GPCR downstream signalling|G alpha (s) signalling events|Olfactory Signaling Pathway	Organismal Systems	Sensory system	Olfactory transduction	NA
390151	OR8H2	2	Vertebrates	2.85714	0	NA	1	0	0	1	0	Signal Transduction	Signaling by GPCR|GPCR downstream signalling|G alpha (s) signalling events|Olfactory Signaling Pathway	Organismal Systems	Sensory system	Olfactory transduction	NA
390155	OR5T1	2	Vertebrates	0	0	NA	1	0	0	1	0	Signal Transduction	Signaling by GPCR|GPCR downstream signalling|G alpha (s) signalling events|Olfactory Signaling Pathway	Organismal Systems	Sensory system	Olfactory transduction	NA
390157	OR8K1	3	Mammals	0	0	NA	0	0	NA	1	0	Signal Transduction	Signaling by GPCR|GPCR downstream signalling|G alpha (s) signalling events|Olfactory Signaling Pathway	Organismal Systems	Sensory system	Olfactory transduction	NA
390265	OR10G7	4	Mammals	0	0	NA	0	0	NA	1	0	Signal Transduction	Signaling by GPCR|GPCR downstream signalling|G alpha (s) signalling events|Olfactory Signaling Pathway	Organismal Systems	Sensory system	Olfactory transduction	NA
391114	OR6K3	2	Mammals	0	0	NA	0	0	NA	1	0	Signal Transduction	Signaling by GPCR|GPCR downstream signalling|G alpha (s) signalling events|Olfactory Signaling Pathway	Organismal Systems	Sensory system	Olfactory transduction	NA
391189	OR11L1	0	Vertebrates	0	0	NA	0	0	NA	1	0	Signal Transduction	Signaling by GPCR|GPCR downstream signalling|G alpha (s) signalling events|Olfactory Signaling Pathway	Organismal Systems	Sensory system	Olfactory transduction	NA
391195	OR2T33	3	Mammals	0	0	NA	0	0	NA	1	0	Signal Transduction	Signaling by GPCR|GPCR downstream signalling|G alpha (s) signalling events|Olfactory Signaling Pathway	Organismal Systems	Sensory system	Olfactory transduction	NA
403244	OR2T35	5	Metazoans	0	0	NA	2	17	0	1	0	Signal Transduction	Signaling by GPCR|GPCR downstream signalling|G alpha (s) signalling events|Olfactory Signaling Pathway	NA	NA	NA	NA
440093	H3F3C	31	Last Universal Common Ancestor	0	6	44	21	913	0.0286	0	70	NA	NA	Human Diseases	Cancers: Overview|Immune diseases|Substance dependence	Transcriptional misregulation in cancer|Systemic lupus erythematosus|Alcoholism	NA
440275	EIF2AK4	0	Last Universal Common Ancestor	9.03955	43	38	30	4581	0.092	0	8	NA	NA	Cellular Processes|Genetic Information Processing|Human Diseases	Transport and catabolism|Folding, sorting and degradation|Infectious diseases: Viral	Autophagy - animal|Protein processing in endoplasmic reticulum|Hepatitis C|Measles|Influenza A|Herpes simplex infection|Epstein-Barr virus infection	Regulation of eIF2
442361	OR2A2	9	Vertebrates	0	0	NA	0	0	NA	1	0	Signal Transduction	Signaling by GPCR|GPCR downstream signalling|G alpha (s) signalling events|Olfactory Signaling Pathway	Organismal Systems	Sensory system	Olfactory transduction	NA
442425	FOXB2	0	Opisthokonts	7.48299	0	NA	0	0	NA	0	0	NA	NA	NA	NA	NA	NA
494119	SPANXN2	2	Primates	0	1	NA	0	0	NA	0	0	NA	NA	NA	NA	NA	NA
503835	DUXA	6	Metazoans	1.23457	0	NA	0	0	NA	0	16	NA	NA	NA	NA	NA	NA
60	ACTB	38	Last Universal Common Ancestor	24.2775	43	25	411	489281	0.0659	81	104	Cell-Cell communication|Chromatin organization|Developmental Biology|Disease|DNA Repair|Gene expression (Transcription)|Hemostasis|Immune System|Metabolism of proteins|Signal Transduction|Vesicle-mediated transport	Cell junction organization|Cell-cell junction organization|Cell-extracellular matrix interactions|Adherens junctions interactions|Chromatin modifying enzymes|HATs acetylate histones|Axon guidance|EPH-Ephrin signaling|L1CAM interactions|EPHB-mediated forward signaling|EPH-ephrin mediated repulsion of cells|Recycling pathway of L1|Interaction between L1 and Ankyrins|Diseases of signal transduction|…	Cellular Processes|Environmental Information Processing|Human Diseases|Organismal Systems	Cell growth and death|Cell motility|Cellular community - eukaryotes|Transport and catabolism|Signal transduction|Cancers: Overview|Cancers: Specific types|Cardiovascular diseases|Infectious diseases: Bacterial|Infectious diseases: Viral|Digestive system|Endocrine system|Immune system	Apoptosis|Regulation of actin cytoskeleton|Focal adhesion|Adherens junction|Tight junction|Phagosome|Rap1 signaling pathway|Hippo signaling pathway|Proteoglycans in cancer|Hepatocellular carcinoma|Hypertrophic cardiomyopathy (HCM)|Arrhythmogenic right ventricular cardiomyopathy (ARVC)|Dilated cardiomyopathy (DCM)|Viral myocarditis|Fluid shear stress and atherosclerosis|Bacterial invasion of epith…	Chromatin Remodeling by hSWI/SNF ATP-dependent Complexes
102	ADAM10	0	Opisthokonts	1.19048	43	27	28	26272	0.045	1	11	Developmental Biology|Disease|Extracellular matrix organization|Immune System|Metabolism of proteins|Signal Transduction	Axon guidance|EPH-Ephrin signaling|EPH-ephrin mediated repulsion of cells|Diseases of signal transduction|Signaling by NOTCH1 in Cancer|Signaling by NOTCH1 PEST Domain Mutants in Cancer|Signaling by NOTCH1 t(7;9)(NOTCH1:M1580_K2555) Translocation Mutant|Signaling by NOTCH1 HD Domain Mutants in Cancer|Signaling by NOTCH1 HD+PEST Domain Mutants in Cancer|Constitutive Signaling by NOTCH1 PEST Domain…	Human Diseases	Infectious diseases: Bacterial|Neurodegenerative diseases	Epithelial cell signaling in Helicobacter pylori infection|Alzheimer's disease	Generation of amyloid b-peptide by PS1
114	ADCY8	0	Last Universal Common Ancestor	4.73373	4	41	4	22	0.1667	8	0	Metabolism|Neuronal System|Signal Transduction|Transport of small molecules	Integration of energy metabolism|Glucagon signaling in metabolic regulation|Regulation of insulin secretion|PKA activation in glucagon signalling|Glucagon-like Peptide-1 (GLP1) regulates insulin secretion|Transmission across Chemical Synapses|Neurotransmitter receptors and postsynaptic signal transmission|Activation of NMDA receptor and postsynaptic events|GABA receptor activation|Post NMDA recep…	Cellular Processes|Environmental Information Processing|Human Diseases|Metabolism|Organismal Systems	Cell growth and death|Cellular community - eukaryotes|Signal transduction|Cancers: Overview|Cardiovascular diseases|Drug resistance: Antineoplastic|Infectious diseases: Viral|Substance dependence|Nucleotide metabolism|Aging|Circulatory system|Digestive system|Endocrine system|Environmental adaptation|Immune system|Nervous system|Sensory system	Oocyte meiosis|Gap junction|Rap1 signaling pathway|Calcium signaling pathway|cGMP-PKG signaling pathway|cAMP signaling pathway|Phospholipase D signaling pathway|Apelin signaling pathway|Pathways in cancer|Dilated cardiomyopathy (DCM)|Endocrine resistance|HTLV-I infection|Morphine addiction|Purine metabolism|Longevity regulating pathway|Longevity regulating pathway - multiple species|Adrenergic si…	NA
120	ADD3	0	Last Universal Common Ancestor	1.69492	43	44	30	7973	0.069	1	18	Transport of small molecules	Miscellaneous transport and binding events	NA	NA	NA	NA
173	AFM	0	Vertebrates	0	2	0	5	95	0.1	0	0	NA	NA	NA	NA	NA	NA
284	ANGPT1	0	Last Universal Common Ancestor	0.564972	38	14	4	30	0.3333	9	0	Hemostasis|Signal Transduction	Cell surface interactions at the vascular wall|Tie2 Signaling|MAPK family signaling cascades|MAPK1/MAPK3 signaling|RAF/MAP kinase cascade	Environmental Information Processing|Human Diseases	Signal transduction|Immune diseases	MAPK signaling pathway|Ras signaling pathway|Rap1 signaling pathway|HIF-1 signaling pathway|PI3K-Akt signaling pathway|Rheumatoid arthritis	NA
955	ENTPD6	0	Last Universal Common Ancestor	1.35135	43	40	12	1191	0.0152	0	8	Metabolism	Metabolism of nucleotides|Nucleobase catabolism|Phosphate bond hydrolysis by NTPDase proteins	Metabolism	Nucleotide metabolism	Purine metabolism|Pyrimidine metabolism	NA
996	CDC27	8	Last Universal Common Ancestor	32.1637	43	43	120	48044	0.0959	28	54	Cell Cycle|Cellular responses to external stimuli|Immune System	Cell Cycle, Mitotic|Cell Cycle Checkpoints|Regulation of mitotic cell cycle|M Phase|Mitotic Spindle Checkpoint|Inhibition of the proteolytic activity of APC/C required for the onset of anaphase by mitotic spindle checkpoint components|APC/C-mediated degradation of cell cycle proteins|Mitotic Metaphase and Anaphase|Inactivation of APC/C via direct inhibition of the APC/C complex|Autodegradation of…	Cellular Processes|Genetic Information Processing|Human Diseases|Organismal Systems	Cell growth and death|Folding, sorting and degradation|Infectious diseases: Viral|Endocrine system	Cell cycle|Oocyte meiosis|Ubiquitin mediated proteolysis|HTLV-I infection|Progesterone-mediated oocyte maturation	NA
998	CDC42	10	Last Universal Common Ancestor	4.31655	43	40	235	210100	0.028	36	25	Developmental Biology|Hemostasis|Immune System|Signal Transduction	Axon guidance|Myogenesis|EPH-Ephrin signaling|Netrin-1 signaling|CDO in myogenesis|Signaling by ROBO receptors|EPHB-mediated forward signaling|DCC mediated attractive signaling|Inactivation of CDC42 and RAC1|Platelet activation, signaling and aggregation|Factors involved in megakaryocyte development and platelet production|GPVI-mediated activation cascade|Cytokine Signaling in Immune system|Adapt…	Cellular Processes|Environmental Information Processing|Human Diseases|Organismal Systems	Cell motility|Cellular community - eukaryotes|Transport and catabolism|Signal transduction|Cancers: Overview|Cancers: Specific types|Endocrine and metabolic diseases|Infectious diseases: Bacterial|Infectious diseases: Viral|Development|Endocrine system|Immune system|Nervous system	Regulation of actin cytoskeleton|Focal adhesion|Adherens junction|Tight junction|Endocytosis|MAPK signaling pathway|Ras signaling pathway|Rap1 signaling pathway|VEGF signaling pathway|Pathways in cancer|Viral carcinogenesis|Proteoglycans in cancer|Renal cell carcinoma|Pancreatic cancer|Non-alcoholic fatty liver disease (NAFLD)|AGE-RAGE signaling pathway in diabetic complications|Bacterial invasio…	p38 MAPK Signaling Pathway |Role of PI3K subunit p85 in regulation of Actin Organization and Cell Migration|Role of MAL in Rho-Mediated Activation of SRF|Ras Signaling Pathway|How does salmonella hijack a cell|Agrin in Postsynaptic Differentiation
1186	CLCN7	0	Last Universal Common Ancestor	0.564972	43	41	27	6416	0.0627	0	30	Transport of small molecules	Ion channel transport|Stimuli-sensing channels	NA	NA	NA	NA
1240	CMKLR1	0	Vertebrates	0	38	17	2	3	0	0	45	Signal Transduction	Signaling by GPCR|GPCR ligand binding|Class A/1 (Rhodopsin-like receptors)	NA	NA	NA	NA
1462	VCAN	0	Last Universal Common Ancestor	0	40	19	27	9155	0.0541	2	24	Disease|Extracellular matrix organization|Metabolism|Metabolism of proteins	Diseases of glycosylation|Diseases associated with glycosaminoglycan metabolism|Defective B4GALT7 causes EDS, progeroid type|Defective B3GAT3 causes JDSSDHD|Defective CHST3 causes SEDCJD|Defective CHST14 causes EDS, musculocontractural type|Defective CHSY1 causes TPBS|Defective B3GALT6 causes EDSP2 and SEMDJL1|ECM proteoglycans|Metabolism of carbohydrates|Glycosaminoglycan metabolism|Heparan sulf…	Environmental Information Processing	Signaling molecules and interaction	Cell adhesion molecules (CAMs)	NA
1687	GSDME	0	Metazoans	0	39	44	18	1927	0.0654	0	2	NA	NA	NA	NA	NA	NA
1729	DIAPH1	0	Eukaryotes	7.24638	43	37	60	11046	0.0712	4	62	Immune System|Signal Transduction	Innate Immune System|Neutrophil degranulation|Signaling by Rho GTPases|Signaling by Receptor Tyrosine Kinases|Signaling by ERBB2|RHO GTPase Effectors|RHO GTPases Activate Formins|ERBB2 Regulates Cell Motility	Cellular Processes|Human Diseases	Cell motility|Cellular community - eukaryotes|Endocrine and metabolic diseases|Infectious diseases: Bacterial	Regulation of actin cytoskeleton|Focal adhesion|AGE-RAGE signaling pathway in diabetic complications|Shigellosis	Erk and PI-3 Kinase Are Necessary for Collagen Binding in Corneal Epithelia|Role of MAL in Rho-Mediated Activation of SRF|Rho cell motility signaling pathway
1780	DYNC1I1	0	Eukaryotes	3.7037	34	20	56	9694	0.0877	12	1	Cell Cycle|Cellular responses to external stimuli|Immune System|Metabolism of proteins|Signal Transduction|Vesicle-mediated transport	Cell Cycle, Mitotic|Cell Cycle Checkpoints|M Phase|Mitotic Spindle Checkpoint|Amplification of signal from the kinetochores|Mitotic Metaphase and Anaphase|Mitotic Prometaphase|Amplification of signal from unattached kinetochores via a MAD2 inhibitory signal|Resolution of Sister Chromatid Cohesion|Mitotic Anaphase|Separation of Sister Chromatids|Cellular responses to stress|HSP90 chaperone cycle f…	Cellular Processes|Human Diseases|Organismal Systems	Transport and catabolism|Infectious diseases: Bacterial|Excretory system	Phagosome|Salmonella infection|Vasopressin-regulated water reabsorption	NA
1794	DOCK2	0	Eukaryotes	1.12994	39	13	27	2735	0.1083	3	0	Disease|Hemostasis|Immune System	Infectious disease|HIV Infection|Host Interactions of HIV factors|The role of Nef in HIV-1 replication and disease pathogenesis|Nef and signal transduction|Factors involved in megakaryocyte development and platelet production|Innate Immune System|Neutrophil degranulation	Organismal Systems	Immune system	Chemokine signaling pathway|Fc gamma R-mediated phagocytosis	NA
1804	DPP6	0	Last Universal Common Ancestor	1.45985	13	3	5	59	0	0	11	NA	NA	NA	NA	NA	NA
3429	IFI27	0	Mammals	0	43	28	5	25	0.2	1	3	Immune System	Cytokine Signaling in Immune system|Interferon Signaling|Interferon alpha/beta signaling	NA	NA	NA	NA
3663	IRF5	0	Metazoans	0	41	9	37	8512	0.1456	1	1	Immune System	Cytokine Signaling in Immune system|Interferon Signaling|Interferon gamma signaling|Interferon alpha/beta signaling	Organismal Systems	Immune system	Toll-like receptor signaling pathway	The information-processing pathway at the IFN-beta enhancer
3735	KARS	1	Last Universal Common Ancestor	91.8919	43	44	86	11171	0.1357	4	20	Metabolism|Metabolism of proteins	Metabolism of amino acids and derivatives|Selenoamino acid metabolism|SeMet incorporation into proteins|Translation|tRNA Aminoacylation|Cytosolic tRNA aminoacylation|Mitochondrial tRNA aminoacylation	Genetic Information Processing	Translation	Aminoacyl-tRNA biosynthesis	NA
3910	LAMA4	0	Vertebrates	1.12994	39	3	24	2866	0.0616	6	13	Extracellular matrix organization|Signal Transduction	Laminin interactions|Non-integrin membrane-ECM interactions|ECM proteoglycans|Signaling by Receptor Tyrosine Kinases|Signaling by MET|MET promotes cell motility|MET activates PTK2 signaling	Cellular Processes|Environmental Information Processing|Human Diseases	Cellular community - eukaryotes|Signaling molecules and interaction|Signal transduction|Cancers: Overview|Cancers: Specific types|Infectious diseases: Parasitic|Infectious diseases: Viral	Focal adhesion|ECM-receptor interaction|PI3K-Akt signaling pathway|Pathways in cancer|Small cell lung cancer|African trypanosomiasis|Toxoplasmosis|Amoebiasis|Human papillomavirus infection	Agrin in Postsynaptic Differentiation
3955	LFNG	0	Metazoans	0	42	35	6	129	0.4667	0	31	Disease|Signal Transduction	Diseases of glycosylation|Diseases associated with O-glycosylation of proteins|Defective LFNG causes SCDO3|Signaling by NOTCH|Pre-NOTCH Expression and Processing|Pre-NOTCH Processing in Golgi	Environmental Information Processing|Human Diseases|Metabolism	Signal transduction|Infectious diseases: Viral|Glycan biosynthesis and metabolism	Notch signaling pathway|Human papillomavirus infection|Other types of O-glycan biosynthesis	NA
4140	MARK3	0	Last Universal Common Ancestor	7.38636	43	43	64	13320	0.0804	27	1	Disease|Signal Transduction	Diseases of signal transduction|Oncogenic MAPK signaling|Signaling by moderate kinase activity BRAF mutants|Signaling by high-kinase activity BRAF mutants|Signaling by RAS mutants|Signaling by BRAF and RAF fusions|Paradoxical activation of RAF signaling by kinase inactive BRAF|MAPK family signaling cascades|MAPK1/MAPK3 signaling|RAF/MAP kinase cascade|RAF activation|MAP2K and MAPK activation|Nega…	NA	NA	NA	NA
4208	MEF2C	0	Eukaryotes	4.57143	43	23	38	10949	0.1494	3	19	Developmental Biology|Immune System|Organelle biogenesis and maintenance|Signal Transduction	Myogenesis|CDO in myogenesis|Cytokine Signaling in Immune system|Innate Immune System|Toll-Like Receptors Cascades|Signaling by Interleukins|Toll Like Receptor 4 (TLR4) Cascade|Toll Like Receptor 9 (TLR9) Cascade|Toll Like Receptor 10 (TLR10) Cascade|Toll Like Receptor 3 (TLR3) Cascade|Toll Like Receptor 5 (TLR5) Cascade|Toll Like Receptor 7/8 (TLR7/8) Cascade|Toll Like Receptor 2 (TLR2) Cascade|…	Environmental Information Processing|Human Diseases|Organismal Systems	Signal transduction|Cancers: Overview|Cardiovascular diseases|Endocrine system	MAPK signaling pathway|cGMP-PKG signaling pathway|Apelin signaling pathway|Transcriptional misregulation in cancer|Fluid shear stress and atherosclerosis|Oxytocin signaling pathway	ALK in cardiac myocytes|CARM1 and Regulation of the Estrogen Receptor|NFAT and Hypertrophy of the heart (Transcription in the broken heart)
4287	ATXN3	0	Eukaryotes	3.48837	42	41	88	42590	0.0914	4	114	Metabolism of proteins	Post-translational protein modification|Deubiquitination|Josephin domain DUBs	Genetic Information Processing	Folding, sorting and degradation	Protein processing in endoplasmic reticulum	NA
4343	MOV10	0	Last Universal Common Ancestor	3.9548	43	NA	980	1899656	0.0111	48	7	Cellular responses to external stimuli|Gene expression (Transcription)|Signal Transduction	Cellular responses to stress|Cellular Senescence|Oxidative Stress Induced Senescence|Oncogene Induced Senescence|RNA Polymerase II Transcription|Generic Transcription Pathway|Transcriptional Regulation by TP53|Transcriptional regulation by RUNX1|TP53 Regulates Metabolic Genes|Regulation of RUNX1 Expression and Activity|RUNX1 regulates genes involved in megakaryocyte differentiation and platelet f…	NA	NA	NA	NA
4430	MYO1B	0	Eukaryotes	4.05405	41	30	57	4618	0.1867	0	14	NA	NA	NA	NA	NA	NA
4620	MYH2	7	Eukaryotes	0	2	12	23	1298	0.0711	1	22	Immune System|Vesicle-mediated transport	Innate Immune System|Fcgamma receptor (FCGR) dependent phagocytosis|Regulation of actin dynamics for phagocytic cup formation|Membrane Trafficking|Translocation of GLUT4 to the plasma membrane	Cellular Processes	Cellular community - eukaryotes	Tight junction	NFAT and Hypertrophy of the heart (Transcription in the broken heart)
5063	PAK3	0	Opisthokonts	0	22	5	17	239	0.1691	10	36	Developmental Biology|Immune System|Signal Transduction	Axon guidance|EPH-Ephrin signaling|Semaphorin interactions|Signaling by ROBO receptors|Ephrin signaling|Sema3A PAK dependent Axon repulsion|Activation of RAC1|Adaptive Immune System|Innate Immune System|TCR signaling|Costimulation by the CD28 family|C-type lectin receptors (CLRs)|Generation of second messenger molecules|CD28 co-stimulation|CD209 (DC-SIGN) signaling|CD28 dependent Vav1 pathway|Sig…	Cellular Processes|Environmental Information Processing|Human Diseases|Organismal Systems	Cell motility|Cellular community - eukaryotes|Signal transduction|Cancers: Specific types|Development|Immune system	Regulation of actin cytoskeleton|Focal adhesion|ErbB signaling pathway|Ras signaling pathway|Renal cell carcinoma|Axon guidance|T cell receptor signaling pathway	Agrin in Postsynaptic Differentiation
5333	PLCD1	0	Eukaryotes	0	41	34	18	3707	0.0523	0	15	Metabolism	Inositol phosphate metabolism|Synthesis of IP3 and IP4 in the cytosol	Environmental Information Processing|Human Diseases|Metabolism|Organismal Systems	Signal transduction|Endocrine and metabolic diseases|Carbohydrate metabolism|Global and overview maps|Endocrine system	Calcium signaling pathway|Phosphatidylinositol signaling system|AGE-RAGE signaling pathway in diabetic complications|Inositol phosphate metabolism|Metabolic pathways|Thyroid hormone signaling pathway	Phospholipase C d1 in phospholipid associated cell signaling
5782	PTPN12	0	Last Universal Common Ancestor	0	43	43	81	46714	0.088	2	12	Immune System|Signal Transduction	Cytokine Signaling in Immune system|Signaling by Interleukins|Interleukin-1 family signaling|Interleukin-37 signaling|Signaling by Receptor Tyrosine Kinases|Signaling by ERBB2|Signaling by EGFR|Signaling by PDGF|SHC1 events in ERBB2 signaling|EGFR downregulation|Downregulation of ERBB2 signaling	NA	NA	NA	NA
5970	RELA	0	Metazoans	6.28571	43	44	369	338673	0.0609	49	41	Cellular responses to external stimuli|Chromatin organization|Developmental Biology|Disease|Immune System|Signal Transduction	Cellular responses to stress|Cellular Senescence|Senescence-Associated Secretory Phenotype (SASP)|Chromatin modifying enzymes|PKMTs methylate histone lysines|Transcriptional regulation of white adipocyte differentiation|Diseases of Immune System|Diseases associated with the TLR signaling cascade|IKBKG deficiency causes anhidrotic ectodermal dysplasia with immunodeficiency (EDA-ID) (via TLR)|IkBA …	Cellular Processes|Environmental Information Processing|Human Diseases|Organismal Systems	Cell growth and death|Transport and catabolism|Signal transduction|Cancers: Overview|Cancers: Specific types|Cardiovascular diseases|Drug resistance: Antineoplastic|Endocrine and metabolic diseases|Immune diseases|Infectious diseases: Bacterial|Infectious diseases: Parasitic|Infectious diseases: Viral|Substance dependence|Aging|Development|Endocrine system|Immune system|Nervous system	Apoptosis|Cellular senescence|Mitophagy - animal|MAPK signaling pathway|Ras signaling pathway|cAMP signaling pathway|NF-kappa B signaling pathway|HIF-1 signaling pathway|Sphingolipid signaling pathway|PI3K-Akt signaling pathway|TNF signaling pathway|Pathways in cancer|Transcriptional misregulation in cancer|Viral carcinogenesis|Pancreatic cancer|Prostate cancer|Chronic myeloid leukemia|Acute myel…	CD40L Signaling Pathway|Human Cytomegalovirus and Map Kinase Pathways|Ceramide Signaling Pathway|fMLP induced chemokine gene expression in HMC-1 cells|Ras Signaling Pathway|Neuropeptides VIP and PACAP inhibit the apoptosis of activated T cells|NFkB activation by Nontypeable Hemophilus influenzae|Cadmium induces DNA synthesis and proliferation in macrophages|Keratinocyte Differentiation|Activation…
6299	SALL1	1	Metazoans	0	20	44	22	2011	0.1039	1	62	Developmental Biology	Transcriptional regulation of pluripotent stem cells|POU5F1 (OCT4), SOX2, NANOG activate genes related to proliferation	NA	NA	NA	NA
6426	SRSF1	0	Last Universal Common Ancestor	77.8409	43	44	175	51153	0.1746	25	96	Gene expression (Transcription)|Metabolism of RNA	RNA Polymerase II Transcription|RNA Polymerase II Transcription Termination|Cleavage of Growing Transcript in the Termination Region |Processing of Capped Intron-Containing Pre-mRNA|mRNA Splicing|mRNA 3'-end processing|Transport of Mature Transcript to Cytoplasm|Transport of Mature mRNA derived from an Intron-Containing Transcript|mRNA Splicing - Major Pathway|mRNA Splicing - Minor Pathway	Genetic Information Processing|Human Diseases|Organismal Systems	Transcription|Infectious diseases: Viral|Immune system	Spliceosome|Herpes simplex infection|IL-17 signaling pathway	NA
6476	SI	0	Last Universal Common Ancestor	2.82486	6	3	1	0	0	0	1	Digestion and absorption|Disease	Digestion|Digestion of dietary carbohydrate|Diseases of metabolism|Diseases of carbohydrate metabolism|Intestinal saccharidase deficiencies	Metabolism|Organismal Systems	Carbohydrate metabolism|Global and overview maps|Digestive system	Galactose metabolism|Starch and sucrose metabolism|Metabolic pathways|Carbohydrate digestion and absorption	NA
6530	SLC6A2	0	Last Universal Common Ancestor	0.675676	4	5	5	98	0.1	0	0	Disease|Transport of small molecules	Disorders of transmembrane transporters|SLC transporter disorders|Defective SLC6A2 causes orthostatic intolerance (OI)|SLC-mediated transmembrane transport|Transport of bile salts and organic acids, metal ions and amine compounds|Na+/Cl- dependent neurotransmitter transporters	NA	NA	NA	NA
6531	SLC6A3	0	Last Universal Common Ancestor	0	0	3	17	1074	0.1103	0	2	Disease|Neuronal System|Transport of small molecules	Disorders of transmembrane transporters|SLC transporter disorders|Defective SLC6A3 causes Parkinsonism-dystonia infantile (PKDYS)|Defective SLC6A3 causes Parkinsonism-dystonia infantile (PKDYS)|Transmission across Chemical Synapses|Neurotransmitter clearance|Dopamine clearance from the synaptic cleft|SLC-mediated transmembrane transport|Transport of bile salts and organic acids, metal ions and am…	Human Diseases|Organismal Systems	Neurodegenerative diseases|Substance dependence|Nervous system	Parkinson's disease|Cocaine addiction|Amphetamine addiction|Alcoholism|Dopaminergic synapse	NA
6867	TACC1	0	Metazoans	0	43	44	35	3126	0.042	3	21	NA	NA	NA	NA	NA	NA
7038	TG	0	Last Universal Common Ancestor	1.69492	13	1	9	198	0.2222	1	24	NA	NA	Human Diseases|Organismal Systems	Immune diseases|Endocrine system	Autoimmune thyroid disease|Thyroid hormone synthesis	NA
7039	TGFA	0	Vertebrates	0	31	42	17	4807	0.0588	10	38	Gene expression (Transcription)|Metabolism of proteins|Vesicle-mediated transport	RNA Polymerase II Transcription|Generic Transcription Pathway|Transcriptional regulation by the AP-2 (TFAP2) family of transcription factors|TFAP2 (AP-2) family regulates transcription of growth factors and their receptors|Post-translational protein modification|Asparagine N-linked glycosylation|Transport to the Golgi and subsequent modification|ER to Golgi Anterograde Transport|COPII (Coat Prote…	Environmental Information Processing|Human Diseases	Signal transduction|Cancers: Overview|Cancers: Specific types|Drug resistance: Antineoplastic	MAPK signaling pathway|ErbB signaling pathway|Ras signaling pathway|PI3K-Akt signaling pathway|Pathways in cancer|Renal cell carcinoma|Pancreatic cancer|Glioma|Prostate cancer|Non-small cell lung cancer|Hepatocellular carcinoma|EGFR tyrosine kinase inhibitor resistance	NA
7046	TGFBR1	0	Metazoans	1.12994	43	21	194	190749	0.0427	41	50	Disease|Metabolism of proteins|Signal Transduction	Diseases of signal transduction|Signaling by TGF-beta Receptor Complex in Cancer|Loss of Function of SMAD2/3 in Cancer|Loss of Function of TGFBR2 in Cancer|Loss of Function of TGFBR1 in Cancer|SMAD2/3 Phosphorylation Motif Mutants in Cancer|SMAD2/3 MH2 Domain Mutants in Cancer|TGFBR2 Kinase Domain Mutants in Cancer|TGFBR1 KD Mutants in Cancer|TGFBR1 LBD Mutants in Cancer|Post-translational protei…	Cellular Processes|Environmental Information Processing|Human Diseases|Organismal Systems	Cell growth and death|Cellular community - eukaryotes|Transport and catabolism|Signaling molecules and interaction|Signal transduction|Cancers: Overview|Cancers: Specific types|Endocrine and metabolic diseases|Infectious diseases: Parasitic|Infectious diseases: Viral|Development|Endocrine system|Immune system	Cellular senescence|Adherens junction|Endocytosis|Cytokine-cytokine receptor interaction|MAPK signaling pathway|FoxO signaling pathway|TGF-beta signaling pathway|Apelin signaling pathway|Hippo signaling pathway|Pathways in cancer|Colorectal cancer|Pancreatic cancer|Chronic myeloid leukemia|Hepatocellular carcinoma|Gastric cancer|AGE-RAGE signaling pathway in diabetic complications|Chagas disease …	Role of Tob in T-cell activation|MAPKinase Signaling Pathway|NFkB activation by Nontypeable Hemophilus influenzae|CTCF: First Multivalent Nuclear Factor|TGF beta signaling pathway|ALK in cardiac myocytes|Function of SLRP in Bone: An Integrated View|p38 MAPK Signaling Pathway
7158	TP53BP1	0	Eukaryotes	1.70455	43	44	151	67784	0.0752	38	3	Cell Cycle|DNA Repair|Metabolism of proteins	Cell Cycle Checkpoints|G2/M Checkpoints|G2/M DNA damage checkpoint|DNA Double-Strand Break Repair|Homology Directed Repair|Nonhomologous End-Joining (NHEJ)|DNA Double Strand Break Response|Recruitment and ATM-mediated phosphorylation of repair and signaling proteins at DNA double strand breaks|HDR through Homologous Recombination (HR) or Single Strand Annealing (SSA)|Processing of DNA double-stra…	Organismal Systems	Immune system	NOD-like receptor signaling pathway	NA
7161	TP73	0	Opisthokonts	0	8	9	139	40621	0.0843	7	14	Gene expression (Transcription)|Programmed Cell Death	RNA Polymerase II Transcription|Generic Transcription Pathway|Transcriptional Regulation by TP53|Transcriptional regulation by RUNX1|Regulation of TP53 Activity|TP53 Regulates Transcription of Cell Death Genes|RUNX1 regulates transcription of genes involved in differentiation of HSCs|TP53 Regulates Transcription of Genes Involved in Cytochrome C Release|TP53 regulates transcription of several add…	Cellular Processes|Environmental Information Processing|Human Diseases|Organismal Systems	Cell growth and death|Signal transduction|Infectious diseases: Viral|Nervous system	p53 signaling pathway|Hippo signaling pathway|Measles|Neurotrophin signaling pathway	ATM Signaling Pathway
7216	TRO	0	Last Universal Common Ancestor	2.84091	36	NA	25	2240	0.05	1	1	NA	NA	NA	NA	NA	NA
7365	UGT2B10	9	Last Universal Common Ancestor	34	2	NA	1	0	0	0	9	Metabolism	Biological oxidations|Phase II - Conjugation of compounds|Glucuronidation	Human Diseases|Metabolism	Cancers: Overview|Carbohydrate metabolism|Global and overview maps|Lipid metabolism|Metabolism of cofactors and vitamins|Xenobiotics biodegradation and metabolism	Chemical carcinogenesis|Pentose and glucuronate interconversions|Ascorbate and aldarate metabolism|Metabolic pathways|Steroid hormone biosynthesis|Retinol metabolism|Porphyrin and chlorophyll metabolism|Metabolism of xenobiotics by cytochrome P450|Drug metabolism - cytochrome P450|Drug metabolism - other enzymes	NA
7494	XBP1	0	Metazoans	25.3333	43	NA	33	6056	0.0644	0	10	Metabolism of proteins	Unfolded Protein Response (UPR)|ATF6 (ATF6-alpha) activates chaperones|IRE1alpha activates chaperones|XBP1(S) activates chaperone genes|ATF6 (ATF6-alpha) activates chaperone genes	Genetic Information Processing|Human Diseases	Folding, sorting and degradation|Endocrine and metabolic diseases|Infectious diseases: Viral	Protein processing in endoplasmic reticulum|Non-alcoholic fatty liver disease (NAFLD)|HTLV-I infection	NA
7692	ZNF133	0	Last Universal Common Ancestor	0	43	42	21	1425	0.0667	0	1	Gene expression (Transcription)	RNA Polymerase II Transcription|Generic Transcription Pathway	NA	NA	NA	NA
8001	GLRA3	3	Metazoans	0	0	NA	1	0	0	0	17	Neuronal System	Transmission across Chemical Synapses|Neurotransmitter receptors and postsynaptic signal transmission	Environmental Information Processing	Signaling molecules and interaction	Neuroactive ligand-receptor interaction	NA
8029	CUBN	0	Last Universal Common Ancestor	0	18	2	12	1275	0.0909	10	11	Disease|Metabolism|Transport of small molecules	Diseases of metabolism|Defects in vitamin and cofactor metabolism|Defects in cobalamin (B12) metabolism|Defective AMN causes hereditary megaloblastic anemia 1|Defective CUBN causes hereditary megaloblastic anemia 1|Metabolism of vitamins and cofactors|Metabolism of lipids|Metabolism of water-soluble vitamins and cofactors|Metabolism of steroids|Cobalamin (Cbl, vitamin B12) transport and metabolis…	Organismal Systems	Digestive system	Vitamin digestion and absorption	NA
8078	USP5	0	Eukaryotes	29.1429	43	41	81	26886	0.079	1	25	Metabolism of proteins	Post-translational protein modification|Deubiquitination|Protein ubiquitination|Ub-specific processing proteases|Synthesis of active ubiquitin: roles of E1 and E2 enzymes	NA	NA	NA	NA
8439	NSMAF	0	Eukaryotes	0.564972	43	42	39	4642	0.0756	1	4	Signal Transduction	Death Receptor Signalling|TNF signaling|TNFR1-mediated ceramide production	Environmental Information Processing	Signal transduction	Sphingolipid signaling pathway	Ceramide Signaling Pathway
8861	LDB1	0	Metazoans	8.47458	43	40	43	11365	0.0842	11	58	Developmental Biology|Gene expression (Transcription)	Axon guidance|Signaling by ROBO receptors|Regulation of expression of SLITs and ROBOs|RNA Polymerase II Transcription|Generic Transcription Pathway|Transcriptional regulation by RUNX1|RUNX1 regulates transcription of genes involved in differentiation of HSCs	Human Diseases	Cancers: Overview	Transcriptional misregulation in cancer	Multi-step Regulation of Transcription by Pitx2
8877	SPHK1	0	Last Universal Common Ancestor	2.25989	40	23	18	3133	0.1111	1	5	Metabolism|Metabolism of proteins|Signal Transduction	Metabolism of lipids|Sphingolipid metabolism|Sphingolipid de novo biosynthesis|Protein folding|Chaperonin-mediated protein folding|Association of TriC/CCT with target proteins during biosynthesis|Signaling by Receptor Tyrosine Kinases|Signaling by VEGF|VEGFA-VEGFR2 Pathway|VEGFR2 mediated cell proliferation	Environmental Information Processing|Human Diseases|Metabolism|Organismal Systems	Signal transduction|Infectious diseases: Bacterial|Global and overview maps|Lipid metabolism|Immune system	Calcium signaling pathway|Sphingolipid signaling pathway|Phospholipase D signaling pathway|VEGF signaling pathway|Apelin signaling pathway|Tuberculosis|Metabolic pathways|Sphingolipid metabolism|Fc gamma R-mediated phagocytosis	Phospholipids as signalling intermediaries
8924	HERC2	0	Last Universal Common Ancestor	2.02703	41	39	233	166576	0.0283	16	10	Cell Cycle|DNA Repair|Immune System|Metabolism of proteins	Cell Cycle Checkpoints|G2/M Checkpoints|G2/M DNA damage checkpoint|DNA Double-Strand Break Repair|Homology Directed Repair|Nonhomologous End-Joining (NHEJ)|DNA Double Strand Break Response|Recruitment and ATM-mediated phosphorylation of repair and signaling proteins at DNA double strand breaks|HDR through Homologous Recombination (HR) or Single Strand Annealing (SSA)|Processing of DNA double-stra…	Genetic Information Processing	Folding, sorting and degradation	Ubiquitin mediated proteolysis	NA
9096	TBX18	0	Metazoans	0	19	NA	0	0	NA	1	33	NA	NA	NA	NA	NA	NA
9308	CD83	1	Vertebrates	0	41	6	42	6716	0.0105	0	4	NA	NA	NA	NA	NA	NA
9378	NRXN1	0	Eukaryotes	0	18	NA	32	37321	0.0262	4	23	Extracellular matrix organization|Neuronal System	Non-integrin membrane-ECM interactions|Protein-protein interactions at synapses|Neurexins and neuroligins	Environmental Information Processing	Signaling molecules and interaction	Cell adhesion molecules (CAMs)	NA
9425	CDYL	0	Last Universal Common Ancestor	3.9548	43	44	36	10449	0.1349	2	1	NA	NA	NA	NA	NA	NA
9776	ATG13	0	Metazoans	2.89855	43	NA	21	3409	0.3	12	18	Cellular responses to external stimuli	Macroautophagy	Cellular Processes|Organismal Systems	Transport and catabolism|Aging	Autophagy - other|Autophagy - animal|Longevity regulating pathway	NA
9844	ELMO1	0	Opisthokonts	0.568182	43	NA	25	5446	0.07	9	10	Disease|Immune System|Signal Transduction	Infectious disease|HIV Infection|Host Interactions of HIV factors|The role of Nef in HIV-1 replication and disease pathogenesis|Nef and signal transduction|Innate Immune System|Fcgamma receptor (FCGR) dependent phagocytosis|Regulation of actin dynamics for phagocytic cup formation|Signaling by Non-Receptor Tyrosine Kinases|Signaling by Receptor Tyrosine Kinases|Signaling by VEGF|Signaling by PTK6…	Human Diseases|Organismal Systems	Infectious diseases: Bacterial|Immune system	Bacterial invasion of epithelial cells|Shigellosis|Chemokine signaling pathway	NA
9990	SLC12A6	1	Last Universal Common Ancestor	0	42	30	16	1157	0.0333	0	41	Disease|Transport of small molecules	Disorders of transmembrane transporters|SLC transporter disorders|Defective SLC12A6 causes agenesis of the corpus callosum, with peripheral neuropathy (ACCPN)|SLC-mediated transmembrane transport|Transport of inorganic cations/anions and amino acids/oligopeptides|Cation-coupled Chloride cotransporters	NA	NA	NA	NA
10216	PRG4	0	Last Universal Common Ancestor	2.89855	8	24	1	0	0	0	0	NA	NA	NA	NA	NA	NA
10326	SIRPB1	4	Vertebrates	0	16	27	5	1612	0.1	0	0	Cell-Cell communication|Immune System	Signal regulatory protein family interactions|Innate Immune System|DAP12 interactions|Neutrophil degranulation	Organismal Systems	Development	Osteoclast differentiation	NA
10335	MRVI1	0	Metazoans	0	40	44	3	24	0.3333	2	29	Hemostasis	Platelet homeostasis|Nitric oxide stimulates guanylate cyclase|cGMP effects	Environmental Information Processing|Organismal Systems	Signal transduction|Circulatory system	cGMP-PKG signaling pathway|Vascular smooth muscle contraction	NA
10482	NXF1	0	Eukaryotes	79.7688	43	44	1099	2295101	0.0118	11	2	Metabolism of RNA	Processing of Capped Intron-Containing Pre-mRNA|Transport of Mature Transcript to Cytoplasm|Transport of Mature mRNAs Derived from Intronless Transcripts|Transport of Mature mRNA derived from an Intron-Containing Transcript|Transport of the SLBP independent Mature mRNA|Transport of the SLBP Dependant Mature mRNA|Transport of Mature mRNA Derived from an Intronless Transcript	Genetic Information Processing|Human Diseases	Translation|Infectious diseases: Viral	Ribosome biogenesis in eukaryotes|RNA transport|mRNA surveillance pathway|Influenza A|Herpes simplex infection	NA
10592	SMC2	0	Last Universal Common Ancestor	75.5682	41	38	82	21710	0.0915	17	25	Cell Cycle	Cell Cycle, Mitotic|M Phase|Mitotic Prophase|Mitotic Prometaphase|Condensation of Prophase Chromosomes|Condensation of Prometaphase Chromosomes	NA	NA	NA	NA
10725	NFAT5	0	Metazoans	1.14943	43	41	10	335	0.1333	0	135	NA	NA	NA	NA	NA	NA
11078	TRIOBP	0	Metazoans	7.95455	43	42	34	4078	0.0963	0	72	NA	NA	NA	NA	NA	NA
11086	ADAM29	0	Eukaryotes	0	1	NA	0	0	NA	0	1	NA	NA	Metabolism	Global and overview maps	Metabolic pathways	NA
22800	RRAS2	1	Last Universal Common Ancestor	0.714286	43	44	39	9346	0.0526	0	38	NA	NA	Cellular Processes|Environmental Information Processing|Human Diseases	Cell growth and death|Cell motility|Transport and catabolism|Signal transduction|Cancers: Overview|Infectious diseases: Viral	Cellular senescence|Regulation of actin cytoskeleton|Mitophagy - animal|Autophagy - animal|MAPK signaling pathway|Ras signaling pathway|cAMP signaling pathway|Phospholipase D signaling pathway|Apelin signaling pathway|Proteoglycans in cancer|HTLV-I infection	NA
22808	MRAS	0	Last Universal Common Ancestor	0	42	44	15	952	0.0762	0	18	NA	NA	Cellular Processes|Environmental Information Processing|Human Diseases	Cell growth and death|Cell motility|Transport and catabolism|Signal transduction|Cancers: Overview|Infectious diseases: Viral	Cellular senescence|Regulation of actin cytoskeleton|Mitophagy - animal|Autophagy - animal|MAPK signaling pathway|Ras signaling pathway|Rap1 signaling pathway|Phospholipase D signaling pathway|Apelin signaling pathway|Proteoglycans in cancer|HTLV-I infection	NA
22894	DIS3	0	Last Universal Common Ancestor	32.7586	43	44	62	6882	0.1036	7	18	Metabolism of proteins|Metabolism of RNA	Unfolded Protein Response (UPR)|PERK regulates gene expression|ATF4 activates genes|Deadenylation-dependent mRNA decay|Regulation of mRNA stability by proteins that bind AU-rich elements|rRNA processing|mRNA decay by 3' to 5' exoribonuclease|Butyrate Response Factor 1 (BRF1) binds and destabilizes mRNA|Tristetraprolin (TTP, ZFP36) binds and destabilizes mRNA|KSRP (KHSRP) binds and destabilizes mR…	Genetic Information Processing	Folding, sorting and degradation	RNA degradation	NA
23086	EXPH5	0	Vertebrates	0	20	NA	8	646	0.0357	0	23	NA	NA	NA	NA	NA	NA
23111	SPART	0	Eukaryotes	0	43	44	42	4155	0.1057	1	38	NA	NA	Cellular Processes	Transport and catabolism	Endocytosis	NA
23219	FBXO28	0	Metazoans	11.7647	43	NA	55	19327	0.0519	0	57	NA	NA	NA	NA	NA	NA
23244	PDS5A	0	Eukaryotes	33.3333	43	44	66	16556	0.0918	22	28	Cell Cycle	Cell Cycle, Mitotic|M Phase|S Phase|Establishment of Sister Chromatid Cohesion|Mitotic Metaphase and Anaphase|Mitotic Prometaphase|Mitotic Telophase/Cytokinesis|Cohesin Loading onto Chromatin|Resolution of Sister Chromatid Cohesion|Mitotic Anaphase|Separation of Sister Chromatids	NA	NA	NA	NA
23245	ASTN2	0	Metazoans	0	36	NA	3	7	0.3333	0	43	NA	NA	NA	NA	NA	NA
23253	ANKRD12	0	Opisthokonts	0	43	44	17	1583	0.0588	0	16	NA	NA	NA	NA	NA	NA
23399	CTDNEP1	2	Eukaryotes	26.4706	43	43	52	13925	0.0354	1	78	Cell Cycle	Cell Cycle, Mitotic|M Phase|Mitotic Prophase|Nuclear Envelope Breakdown|Depolymerisation of the Nuclear Lamina	NA	NA	NA	NA
23533	PIK3R5	0	Vertebrates	2.02703	35	20	7	4453	0.0476	1	0	Hemostasis|Metabolism|Signal Transduction	Platelet activation, signaling and aggregation|GPVI-mediated activation cascade|Metabolism of lipids|Phospholipid metabolism|PI Metabolism|Synthesis of PIPs at the plasma membrane|Signaling by GPCR|GPCR downstream signalling|G-protein beta:gamma signalling|G beta:gamma signalling through PI3Kgamma	Environmental Information Processing|Human Diseases|Organismal Systems	Signal transduction|Infectious diseases: Parasitic|Infectious diseases: Viral|Circulatory system|Endocrine system|Immune system|Nervous system	cGMP-PKG signaling pathway|Phospholipase D signaling pathway|PI3K-Akt signaling pathway|Apelin signaling pathway|Toxoplasmosis|Kaposi's sarcoma-associated herpesvirus infection|Adrenergic signaling in cardiomyocytes|Oxytocin signaling pathway|Platelet activation|Cholinergic synapse	NA
25791	NGEF	0	Eukaryotes	0	30	42	21	17228	0.0333	0	0	Developmental Biology|Signal Transduction	Axon guidance|EPH-Ephrin signaling|EPHA-mediated growth cone collapse|Signaling by Rho GTPases|Signaling by GPCR|Signaling by Receptor Tyrosine Kinases|Signalling by NGF|Rho GTPase cycle|GPCR downstream signalling|p75 NTR receptor-mediated signalling|G alpha (12/13) signalling events|Cell death signalling via NRAGE, NRIF and NADE|NRAGE signals death through JNK	Organismal Systems	Development	Axon guidance	NA
25953	PNKD	0	Last Universal Common Ancestor	1.44928	43	35	94	26010	0.0133	0	35	NA	NA	NA	NA	NA	NA
26058	GIGYF2	0	Eukaryotes	7.47126	43	37	107	18789	0.215	0	13	NA	NA	NA	NA	NA	NA
27030	MLH3	0	Last Universal Common Ancestor	0	43	NA	42	4444	0.0337	1	4	Cell Cycle|Reproduction	Meiosis|Meiotic recombination|Meiosis|Meiotic recombination	Genetic Information Processing	Replication and repair	Mismatch repair	NA
27102	EIF2AK1	1	Last Universal Common Ancestor	0.568182	43	44	17	1689	0.2794	0	6	NA	NA	Genetic Information Processing|Human Diseases	Folding, sorting and degradation|Infectious diseases: Viral	Protein processing in endoplasmic reticulum|Hepatitis C|Measles|Influenza A|Herpes simplex infection|Epstein-Barr virus infection	Regulation of eIF2
27253	PCDH17	0	Last Universal Common Ancestor	0	28	40	10	831	0.0444	0	26	NA	NA	NA	NA	NA	NA
29940	DSE	1	Vertebrates	0.564972	42	32	10	788	0.0222	0	18	Metabolism	Metabolism of carbohydrates|Glycosaminoglycan metabolism|Chondroitin sulfate/dermatan sulfate metabolism|Dermatan sulfate biosynthesis	Metabolism	Global and overview maps|Glycan biosynthesis and metabolism	Metabolic pathways|Glycosaminoglycan biosynthesis - chondroitin sulfate / dermatan sulfate	NA
50854	C6orf48	0	Mammals	5.14286	43	NA	1	0	0	0	7	NA	NA	NA	NA	NA	NA
51134	CEP83	0	Metazoans	0	42	44	19	23334	0.0468	0	3	Organelle biogenesis and maintenance	Cilium Assembly|Anchoring of the basal body to the plasma membrane	NA	NA	NA	NA
51135	IRAK4	0	-	0	42	44	27	1058	0.1453	29	77	Disease|Immune System|Signal Transduction	Diseases of Immune System|Diseases associated with the TLR signaling cascade|MyD88 deficiency (TLR2/4)|MyD88 deficiency (TLR5)|IRAK4 deficiency (TLR5)|IRAK4 deficiency (TLR2/4)|Cytokine Signaling in Immune system|Innate Immune System|Toll-Like Receptors Cascades|Signaling by Interleukins|Toll Like Receptor 4 (TLR4) Cascade|Toll Like Receptor 9 (TLR9) Cascade|Toll Like Receptor 10 (TLR10) Cascade|…	Environmental Information Processing|Human Diseases|Organismal Systems	Signal transduction|Infectious diseases: Bacterial|Infectious diseases: Parasitic|Infectious diseases: Viral|Immune system|Nervous system	MAPK signaling pathway|NF-kappa B signaling pathway|Pertussis|Tuberculosis|Leishmaniasis|Chagas disease (American trypanosomiasis)|Toxoplasmosis|Measles|Influenza A|Toll-like receptor signaling pathway|NOD-like receptor signaling pathway|Neurotrophin signaling pathway	NA
51765	STK26	1	Last Universal Common Ancestor	0	40	24	73	17890	0.1214	0	8	Programmed Cell Death	Apoptosis|Apoptotic execution phase|Apoptotic cleavage of cellular proteins	NA	NA	NA	NA
54549	SDK2	0	Opisthokonts	0	14	NA	10	1112	0.0444	0	45	Cell-Cell communication	Cell junction organization|Cell-cell junction organization|SDK interactions	NA	NA	NA	NA
54674	LRRN3	0	Last Universal Common Ancestor	23.8095	24	41	3	45	0	0	1	NA	NA	NA	NA	NA	NA
54806	AHI1	0	Eukaryotes	0	41	36	39	3707	0.1174	4	24	Organelle biogenesis and maintenance	Cilium Assembly|Anchoring of the basal body to the plasma membrane	NA	NA	NA	NA
54861	SNRK	0	Eukaryotes	0	43	38	9	1240	0.0556	0	35	NA	NA	NA	NA	NA	NA
54875	CNTLN	0	Last Universal Common Ancestor	3.44828	36	43	7	605	0.1429	0	18	NA	NA	NA	NA	NA	NA
55146	ZDHHC4	0	Eukaryotes	0	43	24	1	0	0	0	2	NA	NA	NA	NA	NA	NA
55226	NAT10	0	Last Universal Common Ancestor	34.4828	43	29	76	6772	0.2182	2	23	Metabolism of RNA	rRNA processing|rRNA processing in the nucleus and cytosol|rRNA modification in the nucleus and cytosol	Genetic Information Processing	Translation	Ribosome biogenesis in eukaryotes	NA
55552	ZNF823	6	Last Universal Common Ancestor	2.89855	40	NA	1	0	0	0	2	NA	NA	NA	NA	NA	NA
55754	TMEM30A	0	Eukaryotes	4.7619	43	36	63	97029	0.0282	0	63	Immune System	Innate Immune System|Neutrophil degranulation	NA	NA	NA	NA
55783	CMTR2	0	Eukaryotes	34.3284	43	26	6	6	0.6667	0	7	NA	NA	NA	NA	NA	NA
55966	AJAP1	0	Vertebrates	3.48837	10	NA	2	0	1	1	62	NA	NA	NA	NA	NA	NA
56884	FSTL5	0	Metazoans	0	3	NA	2	8	0	0	0	NA	NA	NA	NA	NA	NA
57088	PLSCR4	0	Eukaryotes	0.568182	42	23	15	1741	0.0381	0	14	NA	NA	NA	NA	NA	NA
57117	INTS12	0	Eukaryotes	3.61446	43	44	32	16802	0.1008	6	1	Gene expression (Transcription)	RNA Polymerase II Transcription|RNA polymerase II transcribes snRNA genes	NA	NA	NA	NA
64421	DCLRE1C	0	Last Universal Common Ancestor	2.46914	39	NA	36	2428	0.1079	9	8	DNA Repair	DNA Double-Strand Break Repair|Nonhomologous End-Joining (NHEJ)	Genetic Information Processing|Human Diseases	Replication and repair|Immune diseases	Non-homologous end-joining|Primary immunodeficiency	NA
65057	ACD	0	Vertebrates	19.4444	42	39	68	31937	0.0926	9	1	Cell Cycle|Cellular responses to external stimuli|Reproduction	Meiosis|Chromosome Maintenance|Meiotic synapsis|Telomere Maintenance|Packaging Of Telomere Ends|Cellular responses to stress|Cellular Senescence|DNA Damage/Telomere Stress Induced Senescence|Meiosis|Meiotic synapsis	NA	NA	NA	NA
65217	PCDH15	0	Last Universal Common Ancestor	5.68182	3	NA	2	0	0	0	0	NA	NA	NA	NA	NA	NA
79710	MORC4	0	Eukaryotes	0.564972	42	3	12	451	0.0606	0	33	NA	NA	NA	NA	NA	NA
79800	CARF	0	Metazoans	0	41	44	4	199	0.1667	0	8	NA	NA	NA	NA	NA	NA
80059	LRRTM4	0	Last Universal Common Ancestor	0	10	NA	2	232	0	0	7	Neuronal System	Protein-protein interactions at synapses|Neurexins and neuroligins	NA	NA	NA	NA
80230	RUFY1	0	Opisthokonts	0.564972	43	42	56	11157	0.0416	1	0	Metabolism	Metabolism of lipids|Phospholipid metabolism|PI Metabolism|Synthesis of PIPs at the plasma membrane	Cellular Processes	Transport and catabolism	Endocytosis	NA
80336	PABPC1L	0	Eukaryotes	2.89855	42	NA	5	77	0.2	0	1	NA	NA	Genetic Information Processing	Folding, sorting and degradation|Translation	RNA degradation|RNA transport|mRNA surveillance pathway	NA
83999	KREMEN1	0	Metazoans	0	41	NA	1	0	0	2	138	Disease|Signal Transduction	Diseases of signal transduction|Signaling by WNT in cancer|Misspliced LRP5 mutants have enhanced beta-catenin-dependent signaling|Signaling by WNT|TCF dependent signaling in response to WNT|Negative regulation of TCF-dependent signaling by WNT ligand antagonists	NA	NA	NA	NA
84000	TMPRSS13	0	Last Universal Common Ancestor	1.69492	13	NA	4	26	0	0	1	NA	NA	Human Diseases	Infectious diseases: Viral	Influenza A	NA
84223	IQCG	0	Opisthokonts	13.2867	40	7	2	0	1	0	10	NA	NA	NA	NA	NA	NA
84539	MCHR2	0	Vertebrates	0.675676	0	NA	1	0	0	5	1	Signal Transduction	Signaling by GPCR|GPCR downstream signalling|GPCR ligand binding|Class A/1 (Rhodopsin-like receptors)|G alpha (q) signalling events|G alpha (i) signalling events|Peptide ligand-binding receptors	Environmental Information Processing	Signaling molecules and interaction	Neuroactive ligand-receptor interaction	NA
84620	ST6GAL2	0	Eukaryotes	0	15	NA	1	0	0	0	24	Metabolism of proteins	Post-translational protein modification|Asparagine N-linked glycosylation|Biosynthesis of the N-glycan precursor (dolichol lipid-linked oligosaccharide, LLO) and transfer to a nascent protein|Synthesis of substrates in N-glycan biosythesis|Sialic acid metabolism	Metabolism	Global and overview maps|Glycan biosynthesis and metabolism	Metabolic pathways|N-Glycan biosynthesis|Other types of O-glycan biosynthesis	NA
85441	HELZ2	0	Last Universal Common Ancestor	4.51977	39	NA	11	246	0.0364	2	2	Circadian Clock|Developmental Biology|Gene expression (Transcription)|Metabolism|Organelle biogenesis and maintenance	RORA activates gene expression|BMAL1:CLOCK,NPAS2 activates circadian gene expression|Transcriptional regulation of white adipocyte differentiation|RNA Polymerase II Transcription|Generic Transcription Pathway|YAP1- and WWTR1 (TAZ)-stimulated gene expression|Transcriptional regulation by RUNX3|RUNX3 regulates YAP1-mediated transcription|Metabolism of lipids|Regulation of lipid metabolism by Peroxi…	NA	NA	NA	NA
91661	ZNF765	12	Last Universal Common Ancestor	0	37	NA	3	10	0	0	0	NA	NA	NA	NA	NA	NA
91768	CABLES1	0	Eukaryotes	1.35135	40	NA	14	1519	0.1538	3	39	Hemostasis	Factors involved in megakaryocyte development and platelet production	NA	NA	NA	NA
92002	CCNQ	4	Eukaryotes	3.14961	43	28	16	652	0.0417	0	18	NA	NA	NA	NA	NA	NA
92552	ATXN3L	0	Eukaryotes	2.7027	1	NA	8	56	0.3571	0	10	Metabolism of proteins	Post-translational protein modification|Deubiquitination|Josephin domain DUBs	Genetic Information Processing	Folding, sorting and degradation	Protein processing in endoplasmic reticulum	NA
93492	TPTE2	2	Last Universal Common Ancestor	0.714286	1	NA	53	9590	0.0871	0	1	Metabolism	Metabolism of lipids|Phospholipid metabolism|PI Metabolism|Synthesis of PIPs at the Golgi membrane	NA	NA	NA	NA
94241	TP53INP1	0	Metazoans	0.564972	43	26	13	812	0.1795	2	90	Gene expression (Transcription)	RNA Polymerase II Transcription|Generic Transcription Pathway|Transcriptional Regulation by TP53|Regulation of TP53 Activity|TP53 Regulates Transcription of Cell Death Genes|TP53 Regulates Transcription of Genes Involved in Cytochrome C Release|Regulation of TP53 Activity through Phosphorylation	Human Diseases	Infectious diseases: Viral	HTLV-I infection	NA
113791	PIK3IP1	0	Vertebrates	0	43	NA	1	0	0	0	1	NA	NA	NA	NA	NA	NA
114548	NLRP3	0	Opisthokonts	4.57516	24	31	55	7101	0.0195	4	3	Immune System|Metabolism of proteins	Innate Immune System|Nucleotide-binding domain, leucine rich repeat containing receptor (NLR) signaling pathways|Inflammasomes|The NLRP3 inflammasome|Post-translational protein modification|Deubiquitination|Metalloprotease DUBs	Cellular Processes|Human Diseases|Organismal Systems	Cell growth and death|Infectious diseases: Bacterial|Infectious diseases: Viral|Immune system	Necroptosis|Pertussis|Influenza A|NOD-like receptor signaling pathway	NA
114780	PKD1L2	0	-	0	NA	NA	2	35	0	0	0	NA	NA	NA	NA	NA	NA
126969	SLC44A3	0	Eukaryotes	1.44928	38	28	1	0	0	0	0	Metabolism|Transport of small molecules	Metabolism of lipids|Phospholipid metabolism|Glycerophospholipid biosynthesis|Synthesis of PC|SLC-mediated transmembrane transport|Transport of bile salts and organic acids, metal ions and amine compounds	Human Diseases	Cancers: Overview	Choline metabolism in cancer	NA
127255	LRRIQ3	0	Last Universal Common Ancestor	1.12994	3	8	4	96	0	0	0	NA	NA	NA	NA	NA	NA
129446	XIRP2	0	Vertebrates	0.564972	3	26	6	81	0.1333	0	15	NA	NA	NA	NA	NA	NA
140453	MUC17	0	Last Universal Common Ancestor	0.564972	3	3	0	0	NA	1	30	Disease|Immune System|Metabolism of proteins	Diseases of glycosylation|Diseases associated with O-glycosylation of proteins|Defective GALNT3 causes familial hyperphosphatemic tumoral calcinosis (HFTC)|Defective C1GALT1C1 causes Tn polyagglutination syndrome (TNPS)|Defective GALNT12 causes colorectal cancer 1 (CRCS1)|Innate Immune System|C-type lectin receptors (CLRs)|Dectin-2 family|Post-translational protein modification|O-linked glycosyla…	NA	NA	NA	NA
146167	SLC38A8	0	Last Universal Common Ancestor	10.1449	1	NA	0	0	NA	0	0	NA	NA	NA	NA	NA	NA
147409	DSG4	0	Last Universal Common Ancestor	1.12994	0	0	37	8009	0	5	0	Developmental Biology	Keratinization|Formation of the cornified envelope	NA	NA	NA	NA
219743	TYSND1	0	Last Universal Common Ancestor	2.89855	34	NA	9	820	0.1111	1	2	NA	NA	NA	NA	NA	NA
219972	MPEG1	1	Metazoans	10.1449	41	43	2	4	0	0	17	NA	NA	NA	NA	NA	NA
221496	LEMD2	0	Eukaryotes	5.74713	43	44	34	11906	0.0214	2	19	Cell Cycle	Cell Cycle, Mitotic|M Phase|Mitotic Metaphase and Anaphase|Mitotic Prophase|Nuclear Envelope Breakdown|Mitotic Anaphase|Clearance of Nuclear Envelope Membranes from Chromatin|Nuclear Envelope Reassembly|Depolymerisation of the Nuclear Lamina|Initiation of Nuclear Envelope Reformation	NA	NA	NA	NA
221545	C6orf136	0	Metazoans	19.4631	40	42	3	7	0	0	0	NA	NA	NA	NA	NA	NA
221935	SDK1	0	Metazoans	0.564972	34	43	6	304	0.0667	0	31	Cell-Cell communication	Cell junction organization|Cell-cell junction organization|SDK interactions	NA	NA	NA	NA
221937	FOXK1	0	Eukaryotes	5.88235	42	44	94	20766	0.0741	1	249	Metabolism of proteins	Post-translational protein modification|Deubiquitination|UCH proteinases	NA	NA	NA	NA
245929	DEFB115	0	Mammals	0	1	NA	0	0	NA	1	0	Immune System	Innate Immune System|Antimicrobial peptides|Defensins|Beta defensins	NA	NA	NA	NA
253012	HEPACAM2	0	Vertebrates	5.68182	13	NA	37	4079	0.0165	0	0	NA	NA	NA	NA	NA	NA
283464	GXYLT1	3	Eukaryotes	0	41	NA	12	1354	0.0758	0	68	NA	NA	Metabolism	Glycan biosynthesis and metabolism	Other types of O-glycan biosynthesis	NA
339967	TMPRSS11A	0	Last Universal Common Ancestor	0	2	NA	8	691	0.0357	0	2	NA	NA	NA	NA	NA	NA
340260	UNCX	0	Eukaryotes	4.34783	0	NA	0	0	NA	0	0	NA	NA	NA	NA	NA	NA
346007	EYS	0	Eukaryotes	0	0	0	1	0	0	0	5	NA	NA	NA	NA	NA	NA
359948	IRF2BP2	0	Metazoans	12.6437	43	43	22	5831	0.1299	1	77	NA	NA	NA	NA	NA	NA
374393	FAM111B	0	Vertebrates	0	14	19	8	329	0.0714	0	1	NA	NA	NA	NA	NA	NA
374864	CCDC178	0	Metazoans	5.64972	14	NA	0	0	NA	0	0	NA	NA	NA	NA	NA	NA
388468	POTEC	11	Last Universal Common Ancestor	0	1	NA	8	16498	0.0714	0	0	NA	NA	NA	NA	NA	NA
440279	UNC13C	0	Opisthokonts	0	4	NA	0	0	NA	0	1	NA	NA	Organismal Systems	Nervous system	Synaptic vesicle cycle	NA
644591	PPIAL4G	65	Last Universal Common Ancestor	10.7143	0	NA	17	21369	0.0074	0	5	NA	NA	NA	NA	NA	NA
645432	ARRDC5	0	Last Universal Common Ancestor	0	5	NA	3	30	0	0	0	NA	NA	NA	NA	NA	NA
646450	ARIH2OS	0	Mammals	0	36	NA	0	0	NA	0	21	NA	NA	NA	NA	NA	NA
727832	GOLGA6L6	5	Primates	57.1429	1	NA	0	0	NA	0	0	NA	NA	NA	NA	NA	NA
71	ACTG1	38	Last Universal Common Ancestor	28.3019	43	44	170	75182	0.0869	52	71	Cell-Cell communication|Developmental Biology|Disease|Immune System|Signal Transduction|Vesicle-mediated transport	Cell junction organization|Cell-cell junction organization|Cell-extracellular matrix interactions|Adherens junctions interactions|Axon guidance|EPH-Ephrin signaling|L1CAM interactions|EPHB-mediated forward signaling|EPH-ephrin mediated repulsion of cells|Recycling pathway of L1|Interaction between L1 and Ankyrins|Diseases of signal transduction|Oncogenic MAPK signaling|Signaling by moderate kinas…	Cellular Processes|Environmental Information Processing|Human Diseases|Organismal Systems	Cell growth and death|Cell motility|Cellular community - eukaryotes|Transport and catabolism|Signal transduction|Cancers: Overview|Cancers: Specific types|Cardiovascular diseases|Infectious diseases: Bacterial|Infectious diseases: Viral|Endocrine system|Immune system	Apoptosis|Regulation of actin cytoskeleton|Focal adhesion|Adherens junction|Tight junction|Phagosome|Rap1 signaling pathway|Hippo signaling pathway|Proteoglycans in cancer|Hepatocellular carcinoma|Hypertrophic cardiomyopathy (HCM)|Arrhythmogenic right ventricular cardiomyopathy (ARVC)|Dilated cardiomyopathy (DCM)|Viral myocarditis|Fluid shear stress and atherosclerosis|Bacterial invasion of epith…	HIV-I Nef: negative effector of Fas and TNF
119	ADD2	0	Last Universal Common Ancestor	0.568182	11	17	21	5775	0.0667	2	51	Transport of small molecules	Miscellaneous transport and binding events	NA	NA	NA	NA
290	ANPEP	0	Last Universal Common Ancestor	0	41	15	1	0	0	0	6	Immune System|Metabolism of proteins	Innate Immune System|Neutrophil degranulation|Peptide hormone metabolism|Metabolism of Angiotensinogen to Angiotensins	Metabolism|Organismal Systems	Global and overview maps|Metabolism of other amino acids|Endocrine system|Immune system	Metabolic pathways|Glutathione metabolism|Renin-angiotensin system|Hematopoietic cell lineage	Dendritic cells in regulating TH1 and TH2 Development|SARS Coronavirus Protease
393	ARHGAP4	0	Vertebrates	0.564972	42	17	7	211	0.0476	0	0	Signal Transduction	Signaling by Rho GTPases|Rho GTPase cycle	NA	NA	NA	Rho cell motility signaling pathway
563	AZGP1	1	Mammals	0.564972	31	4	21	3174	0.0429	2	1	Transport of small molecules	Miscellaneous transport and binding events	NA	NA	NA	NA
677	ZFP36L1	0	Eukaryotes	2.94118	43	29	17	1066	0.1397	6	96	Metabolism of RNA	Regulation of mRNA stability by proteins that bind AU-rich elements|Butyrate Response Factor 1 (BRF1) binds and destabilizes mRNA	Cellular Processes	Cell growth and death	Cellular senescence	NA
799	CALCR	0	Metazoans	0	1	6	15	5874	0.0762	4	10	Signal Transduction	Signaling by GPCR|GPCR downstream signalling|GPCR ligand binding|Class B/2 (Secretin family receptors)|G alpha (s) signalling events|Calcitonin-like ligand receptors	Environmental Information Processing|Organismal Systems	Signaling molecules and interaction|Development	Neuroactive ligand-receptor interaction|Osteoclast differentiation	NA
944	TNFSF8	0	Vertebrates	0.564972	20	NA	37	9193	0.0075	1	16	Immune System	Cytokine Signaling in Immune system|TNFR2 non-canonical NF-kB pathway|TNFs bind their physiological receptors	Environmental Information Processing	Signaling molecules and interaction	Cytokine-cytokine receptor interaction	NA
970	CD70	0	Mammals	0.568182	6	NA	79	25860	0.0143	1	1	Immune System	Cytokine Signaling in Immune system|TNFR2 non-canonical NF-kB pathway|TNFs bind their physiological receptors	Environmental Information Processing	Signaling molecules and interaction	Cytokine-cytokine receptor interaction	NA
1012	CDH13	0	Last Universal Common Ancestor	0	35	8	30	5843	0.0092	0	10	Cell-Cell communication	Cell junction organization|Cell-cell junction organization|Adherens junctions interactions	NA	NA	NA	NA
1016	CDH18	0	Last Universal Common Ancestor	2.89855	4	6	5	1374	0.3	2	1	Cell-Cell communication	Cell junction organization|Cell-cell junction organization|Adherens junctions interactions	NA	NA	NA	NA
1183	CLCN4	2	Last Universal Common Ancestor	0	32	6	0	0	NA	0	0	Transport of small molecules	Ion channel transport|Stimuli-sensing channels	NA	NA	NA	NA
1272	CNTN1	0	Metazoans	5.68182	35	1	29	7156	0.0394	4	0	Developmental Biology|Signal Transduction	Axon guidance|L1CAM interactions|Neurofascin interactions|Signaling by NOTCH|Signaling by NOTCH1|Signaling by NOTCH2|Activated NOTCH1 Transmits Signal to the Nucleus|NOTCH2 Activation and Transmission of Signal to the Nucleus	Environmental Information Processing	Signaling molecules and interaction	Cell adhesion molecules (CAMs)	NA
1284	COL4A2	0	Last Universal Common Ancestor	1.70455	41	14	50	40284	0.0457	21	12	Developmental Biology|Extracellular matrix organization|Signal Transduction|Vesicle-mediated transport	Axon guidance|NCAM signaling for neurite out-growth|NCAM1 interactions|Degradation of the extracellular matrix|Collagen formation|Integrin cell surface interactions|Laminin interactions|Non-integrin membrane-ECM interactions|ECM proteoglycans|Collagen degradation|Collagen biosynthesis and modifying enzymes|Assembly of collagen fibrils and other multimeric structures|Anchoring fibril formation|Cro…	Cellular Processes|Environmental Information Processing|Human Diseases|Organismal Systems	Cellular community - eukaryotes|Signaling molecules and interaction|Signal transduction|Cancers: Overview|Cancers: Specific types|Endocrine and metabolic diseases|Infectious diseases: Parasitic|Infectious diseases: Viral|Digestive system|Endocrine system	Focal adhesion|ECM-receptor interaction|PI3K-Akt signaling pathway|Pathways in cancer|Small cell lung cancer|AGE-RAGE signaling pathway in diabetic complications|Amoebiasis|Human papillomavirus infection|Protein digestion and absorption|Relaxin signaling pathway	Intrinsic Prothrombin Activation Pathway|Regulators of Bone Mineralization|Platelet Amyloid Precursor Protein Pathway|Vitamin C in the Brain|Angiotensin-converting enzyme 2 regulates heart function|Acute Myocardial Infarction
1520	CTSS	0	Last Universal Common Ancestor	0	43	28	8	530	0.0357	0	22	Extracellular matrix organization|Immune System	Degradation of the extracellular matrix|Collagen formation|Assembly of collagen fibrils and other multimeric structures|Adaptive Immune System|Innate Immune System|Toll-Like Receptors Cascades|MHC class II antigen presentation|Neutrophil degranulation|Class I MHC mediated antigen processing & presentation|Antigen processing-Cross presentation|Trafficking and processing of endosomal TLR|Endosomal/…	Cellular Processes|Human Diseases|Organismal Systems	Cell growth and death|Transport and catabolism|Infectious diseases: Bacterial|Immune system	Apoptosis|Lysosome|Phagosome|Tuberculosis|Antigen processing and presentation	NA
1524	CX3CR1	0	Vertebrates	0	20	30	1	0	0	3	1	Signal Transduction	Signaling by GPCR|GPCR downstream signalling|GPCR ligand binding|Class A/1 (Rhodopsin-like receptors)|G alpha (i) signalling events|Peptide ligand-binding receptors|Chemokine receptors bind chemokines	Environmental Information Processing|Organismal Systems	Signaling molecules and interaction|Immune system	Cytokine-cytokine receptor interaction|Chemokine signaling pathway	NA
1789	DNMT3B	0	Eukaryotes	2.7027	21	39	70	8873	0.1346	11	14	Gene expression (Transcription)	Epigenetic regulation of gene expression|PRC2 methylates histones and DNA|Negative epigenetic regulation of rRNA expression|DNA methylation|NoRC negatively regulates rRNA expression	Human Diseases|Metabolism	Cancers: Overview|Amino acid metabolism|Global and overview maps	MicroRNAs in cancer|Cysteine and methionine metabolism|Metabolic pathways	NA
1871	E2F3	1	Eukaryotes	12	42	NA	42	6112	0.1173	9	129	Cell Cycle|Cellular responses to external stimuli|DNA Replication|Signal Transduction	Cell Cycle, Mitotic|Mitotic G2-G2/M phases|Mitotic G1-G1/S phases|M/G1 Transition|Regulation of DNA replication|G2 Phase|DNA Replication Pre-Initiation|G1 Phase|Association of licensing factors with the pre-replicative complex|Assembly of the pre-replicative complex|Cyclin D associated events in G1|CDC6 association with the ORC:origin complex|Cellular responses to stress|Cellular Senescence|Oxida…	Cellular Processes|Human Diseases	Cell growth and death|Cancers: Overview|Cancers: Specific types|Drug resistance: Antineoplastic|Infectious diseases: Viral	Cell cycle|Cellular senescence|Pathways in cancer|MicroRNAs in cancer|Pancreatic cancer|Glioma|Prostate cancer|Melanoma|Bladder cancer|Chronic myeloid leukemia|Small cell lung cancer|Non-small cell lung cancer|Breast cancer|Hepatocellular carcinoma|Gastric cancer|Endocrine resistance|Hepatitis B|HTLV-I infection|Kaposi's sarcoma-associated herpesvirus infection	NA
1894	ECT2	0	Eukaryotes	57.7143	40	NA	160	76779	0.0289	1	13	Signal Transduction	Signaling by Rho GTPases|Signaling by GPCR|Signaling by Receptor Tyrosine Kinases|Signalling by NGF|Rho GTPase cycle|GPCR downstream signalling|p75 NTR receptor-mediated signalling|G alpha (12/13) signalling events|Cell death signalling via NRAGE, NRIF and NADE|NRAGE signals death through JNK	NA	NA	NA	NA
1973	EIF4A1	11	Last Universal Common Ancestor	38.5965	43	26	100	28978	0.183	10	25	Immune System|Metabolism of proteins|Metabolism of RNA	Cytokine Signaling in Immune system|Interferon Signaling|Antiviral mechanism by IFN-stimulated genes|ISG15 antiviral mechanism|Translation|Eukaryotic Translation Initiation|L13a-mediated translational silencing of Ceruloplasmin expression|Cap-dependent Translation Initiation|Activation of the mRNA upon binding of the cap-binding complex and eIFs, and subsequent binding to 43S|Ribosomal scanning a…	Genetic Information Processing	Translation	RNA transport	Internal Ribosome entry pathway|Regulation of eIF4e and p70 S6 Kinase|mTOR Signaling Pathway|Eukaryotic protein translation
1997	ELF1	0	Last Universal Common Ancestor	3.9548	43	40	10	165	0.2444	3	2	Gene expression (Transcription)	RNA Polymerase II Transcription|Generic Transcription Pathway|Transcriptional regulation by RUNX1|RUNX1 regulates transcription of genes involved in BCR signaling|RUNX1 regulates transcription of genes involved in interleukin signaling	NA	NA	NA	NA
2305	FOXM1	0	Eukaryotes	7.42857	32	43	79	12285	0.0688	9	14	Cell Cycle	Cell Cycle, Mitotic|Mitotic G2-G2/M phases|G2/M Transition|Polo-like kinase mediated events|Cyclin A/B1/B2 associated events during G2/M transition	Cellular Processes	Cell growth and death	Cellular senescence	NA
2321	FLT1	0	Last Universal Common Ancestor	0	41	6	34	8272	0.2175	2	18	Signal Transduction	Signaling by Receptor Tyrosine Kinases|Signaling by VEGF|Neurophilin interactions with VEGF and VEGFR|VEGF ligand-receptor interactions|VEGF binds to VEGFR leading to receptor dimerization	Cellular Processes|Environmental Information Processing|Human Diseases	Cellular community - eukaryotes|Signaling molecules and interaction|Signal transduction|Cancers: Overview|Immune diseases	Focal adhesion|Cytokine-cytokine receptor interaction|MAPK signaling pathway|Ras signaling pathway|Rap1 signaling pathway|HIF-1 signaling pathway|PI3K-Akt signaling pathway|Transcriptional misregulation in cancer|Rheumatoid arthritis	Actions of Nitric Oxide in the Heart|VEGF, Hypoxia, and Angiogenesis
2332	FMR1	0	Eukaryotes	0	43	44	54	11029	0.0999	2	9	NA	NA	Genetic Information Processing	Translation	RNA transport	NA
2334	AFF2	0	Metazoans	0.675676	13	33	4	1	0.8333	0	54	NA	NA	NA	NA	NA	NA
2357	FPR1	1	Vertebrates	0	40	15	8	925	0.1429	2	92	Immune System|Signal Transduction	Cytokine Signaling in Immune system|Innate Immune System|Signaling by Interleukins|Neutrophil degranulation|Interleukin-10 signaling|Signaling by GPCR|GPCR downstream signalling|GPCR ligand binding|Class A/1 (Rhodopsin-like receptors)|G alpha (i) signalling events|Peptide ligand-binding receptors|Formyl peptide receptors bind formyl peptides and many other ligands	Environmental Information Processing|Human Diseases	Signaling molecules and interaction|Signal transduction|Infectious diseases: Bacterial	Neuroactive ligand-receptor interaction|Rap1 signaling pathway|Staphylococcus aureus infection	fMLP induced chemokine gene expression in HMC-1 cells
2771	GNAI2	2	Eukaryotes	6.25	43	42	131	146534	0.0424	15	47	Hemostasis|Metabolism|Metabolism of proteins|Neuronal System|Signal Transduction	Platelet activation, signaling and aggregation|Signal amplification|ADP signalling through P2Y purinoceptor 12|Integration of energy metabolism|Regulation of insulin secretion|Adrenaline,noradrenaline inhibits insulin secretion|Protein folding|Chaperonin-mediated protein folding|Cooperation of PDCL (PhLP1) and TRiC/CCT in G-protein beta folding|Transmission across Chemical Synapses|Neurotransmitt…	Cellular Processes|Environmental Information Processing|Human Diseases|Organismal Systems	Cellular community - eukaryotes|Signal transduction|Cancers: Overview|Infectious diseases: Bacterial|Infectious diseases: Parasitic|Neurodegenerative diseases|Substance dependence|Circulatory system|Development|Digestive system|Endocrine system|Environmental adaptation|Immune system|Nervous system	Gap junction|Rap1 signaling pathway|cGMP-PKG signaling pathway|cAMP signaling pathway|Sphingolipid signaling pathway|Apelin signaling pathway|Pathways in cancer|Pertussis|Chagas disease (American trypanosomiasis)|Toxoplasmosis|Parkinson's disease|Cocaine addiction|Morphine addiction|Alcoholism|Adrenergic signaling in cardiomyocytes|Axon guidance|Gastric acid secretion|Progesterone-mediated oocyte…	NA
2969	GTF2I	2	Vertebrates	8.57143	43	44	121	63829	0.0807	6	17	NA	NA	Environmental Information Processing|Genetic Information Processing|Human Diseases	Signal transduction|Transcription|Infectious diseases: Viral	cGMP-PKG signaling pathway|Basal transcription factors|Herpes simplex infection	NA
3242	HPD	0	Last Universal Common Ancestor	0.584795	21	2	6	47	0.1333	0	0	Metabolism	Metabolism of amino acids and derivatives|Histidine, lysine, phenylalanine, tyrosine, proline and tryptophan catabolism|Phenylalanine and tyrosine catabolism	Metabolism	Amino acid metabolism|Global and overview maps|Metabolism of cofactors and vitamins	Tyrosine metabolism|Phenylalanine metabolism|Metabolic pathways|Ubiquinone and other terpenoid-quinone biosynthesis	NA
3621	ING1	0	Eukaryotes	3.40909	43	44	52	8508	0.2119	9	42	NA	NA	NA	NA	NA	NA
3664	IRF6	0	Metazoans	0.564972	40	39	6	93	0	1	1	Immune System	Cytokine Signaling in Immune system|Interferon Signaling|Interferon gamma signaling|Interferon alpha/beta signaling	NA	NA	NA	NA
3697	ITIH1	0	Last Universal Common Ancestor	0	2	21	6	265	0.1333	1	1	NA	NA	NA	NA	NA	NA
3782	KCNN3	0	Eukaryotes	28.7356	25	33	5	132	0.2	0	82	Neuronal System	Potassium Channels|Ca2+ activated K+ channels	Organismal Systems	Endocrine system	Insulin secretion	NA
3984	LIMK1	0	Last Universal Common Ancestor	1.69492	43	43	51	14127	0.0714	2	51	Developmental Biology|Immune System|Signal Transduction	Axon guidance|EPH-Ephrin signaling|Semaphorin interactions|EPHB-mediated forward signaling|Sema3A PAK dependent Axon repulsion|Sema4D in semaphorin signaling|Sema4D induced cell migration and growth-cone collapse|Innate Immune System|Fcgamma receptor (FCGR) dependent phagocytosis|Regulation of actin dynamics for phagocytic cup formation|Signaling by Rho GTPases|RHO GTPase Effectors|RHO GTPases Ac…	Cellular Processes|Organismal Systems	Cell motility|Development|Immune system	Regulation of actin cytoskeleton|Axon guidance|Fc gamma R-mediated phagocytosis	Rho cell motility signaling pathway|Rac 1 cell motility signaling pathway|CCR3 signaling in Eosinophils|Role of MAL in Rho-Mediated Activation of SRF
4009	LMX1A	0	Eukaryotes	1.16959	3	NA	6	873	0.2667	0	16	NA	NA	NA	NA	NA	NA
4152	MBD1	0	Last Universal Common Ancestor	0.564972	43	40	41	11863	0.1341	5	31	NA	NA	NA	NA	NA	NA
4170	MCL1	0	Metazoans	28.4091	43	44	66	24807	0.0825	1	99	Immune System	Cytokine Signaling in Immune system|Signaling by Interleukins|Interleukin-4 and 13 signaling	Cellular Processes|Environmental Information Processing|Human Diseases	Cell growth and death|Signal transduction|Cancers: Overview	Apoptosis|PI3K-Akt signaling pathway|Jak-STAT signaling pathway|MicroRNAs in cancer	NA
4288	MKI67	0	Opisthokonts	2.25989	17	27	50	6284	0.1657	1	83	NA	NA	NA	NA	NA	NA
4308	TRPM1	0	Eukaryotes	1.16279	2	0	3	2	0	0	8	Transport of small molecules	Ion channel transport|Stimuli-sensing channels|TRP channels	NA	NA	NA	NA
4331	MNAT1	0	Eukaryotes	23.8372	43	40	61	8581	0.0995	72	1	Cell Cycle|Disease|DNA Repair|Gene expression (Transcription)|Metabolism of RNA	Cell Cycle, Mitotic|Mitotic G2-G2/M phases|Mitotic G1-G1/S phases|S Phase|G1/S Transition|G1 Phase|G2/M Transition|Cyclin A:Cdk2-associated events at S phase entry|Cyclin E associated events during G1/S transition |Cyclin D associated events in G1|Cyclin A/B1/B2 associated events during G2/M transition|Infectious disease|HIV Infection|HIV Life Cycle|Late Phase of HIV Life Cycle|Transcription of t…	Genetic Information Processing	Replication and repair|Transcription	Nucleotide excision repair|Basal transcription factors	Sonic Hedgehog (SHH) Receptor Ptc1 Regulates cell cycle
4703	NEB	0	Eukaryotes	0	8	1	42	7163	0.0592	0	0	Muscle contraction	Striated Muscle Contraction	NA	NA	NA	NA
4751	NEK2	5	Eukaryotes	0.675676	15	7	45	24961	0.0869	16	7	Cell Cycle|Organelle biogenesis and maintenance	Cell Cycle, Mitotic|Mitotic G2-G2/M phases|Regulation of mitotic cell cycle|M Phase|APC/C-mediated degradation of cell cycle proteins|Mitotic Prometaphase|G2/M Transition|Activation of APC/C and APC/C:Cdc20 mediated degradation of mitotic proteins|Regulation of PLK1 Activity at G2/M Transition|Centrosome maturation|Recruitment of NuMA to mitotic centrosomes|AURKA Activation by TPX2|APC/C:Cdc20 me…	NA	NA	NA	NA
4824	NKX3-1	0	Vertebrates	0.564972	34	4	43	25283	0.0354	2	5	NA	NA	Human Diseases	Cancers: Overview|Cancers: Specific types	Pathways in cancer|Prostate cancer	NA
5173	PDYN	0	Vertebrates	2.32558	2	27	10	2553	0.0889	6	5	Signal Transduction	Signaling by GPCR|GPCR downstream signalling|GPCR ligand binding|Class A/1 (Rhodopsin-like receptors)|G alpha (i) signalling events|Opioid Signalling|Peptide ligand-binding receptors|G-protein activation	Human Diseases	Substance dependence	Cocaine addiction|Amphetamine addiction|Alcoholism	NA
5467	PPARD	0	Eukaryotes	2.89855	43	40	53	8329	0.1255	3	16	Gene expression (Transcription)|Metabolism|Signal Transduction	RNA Polymerase II Transcription|Generic Transcription Pathway|Nuclear Receptor transcription pathway|The citric acid (TCA) cycle and respiratory electron transport|Metabolism of lipids|Pyruvate metabolism and Citric Acid (TCA) cycle|Fatty acid metabolism|Import of palmitoyl-CoA into the mitochondrial matrix|Pyruvate metabolism|Regulation of pyruvate dehydrogenase (PDH) complex|Signaling by Nuclea…	Environmental Information Processing|Human Diseases|Organismal Systems	Signal transduction|Cancers: Overview|Cancers: Specific types|Endocrine system	Wnt signaling pathway|Pathways in cancer|Acute myeloid leukemia|PPAR signaling pathway	Nuclear Receptors in Lipid Metabolism and Toxicity|Basic mechanism of action of PPARa, PPARb(d) and PPARg and effects on gene expression|WNT Signaling Pathway
5525	PPP2R5A	0	Eukaryotes	0	43	NA	41	6006	0.1439	24	4	Cell Cycle|Disease|Hemostasis|Immune System|Signal Transduction	Cell Cycle, Mitotic|Cell Cycle Checkpoints|M Phase|Mitotic Spindle Checkpoint|Amplification of signal from the kinetochores|Mitotic Metaphase and Anaphase|Mitotic Prometaphase|Amplification of signal from unattached kinetochores via a MAD2 inhibitory signal|Resolution of Sister Chromatid Cohesion|Mitotic Anaphase|Separation of Sister Chromatids|Diseases of signal transduction|Signaling by WNT in …	Cellular Processes|Environmental Information Processing|Genetic Information Processing|Human Diseases|Organismal Systems	Cell growth and death|Signal transduction|Translation|Infectious diseases: Viral|Circulatory system|Nervous system	Oocyte meiosis|Sphingolipid signaling pathway|PI3K-Akt signaling pathway|AMPK signaling pathway|mRNA surveillance pathway|Human papillomavirus infection|Adrenergic signaling in cardiomyocytes|Dopaminergic synapse	NA
5545	PRB4	7	-	7.40741	0	NA	1	0	0	0	0	NA	NA	NA	NA	NA	NA
5981	RFC1	0	Eukaryotes	19.4245	43	41	70	5508	0.1685	50	3	Cell Cycle|DNA Repair|DNA Replication	Cell Cycle, Mitotic|Chromosome Maintenance|Telomere Maintenance|S Phase|Extension of Telomeres|Synthesis of DNA|Telomere C-strand (Lagging Strand) Synthesis|DNA strand elongation|Polymerase switching on the C-strand of the telomere|Leading Strand Synthesis|Lagging Strand Synthesis|Polymerase switching|DNA Double-Strand Break Repair|Nucleotide Excision Repair|Base Excision Repair|DNA Damage Bypass…	Genetic Information Processing	Replication and repair	DNA replication|Nucleotide excision repair|Mismatch repair	ALK in cardiac myocytes
6016	RIT1	0	Last Universal Common Ancestor	5.74713	43	41	23	2573	0.1028	2	3	Signal Transduction	Signaling by Receptor Tyrosine Kinases|Signalling by NGF|NGF signalling via TRKA from the plasma membrane|Signalling to ERKs|Signalling to p38 via RIT and RIN	NA	NA	NA	NA
6502	SKP2	0	Opisthokonts	11.5607	42	24	173	87682	0.0708	27	10	Cell Cycle|Gene expression (Transcription)|Immune System|Metabolism of proteins	Cell Cycle, Mitotic|Regulation of mitotic cell cycle|Mitotic G1-G1/S phases|S Phase|APC/C-mediated degradation of cell cycle proteins|G1/S Transition|G1 Phase|Cyclin A:Cdk2-associated events at S phase entry|APC/C:Cdh1 mediated degradation of Cdc20 and other APC/C:Cdh1 targeted proteins in late mitosis/early G1|SCF(Skp2)-mediated degradation of p27/p21|Cyclin E associated events during G1/S trans…	Cellular Processes|Environmental Information Processing|Genetic Information Processing|Human Diseases	Cell growth and death|Signal transduction|Folding, sorting and degradation|Cancers: Overview|Cancers: Specific types|Infectious diseases: Viral	Cell cycle|FoxO signaling pathway|mTOR signaling pathway|Ubiquitin mediated proteolysis|Pathways in cancer|Viral carcinogenesis|Small cell lung cancer|Herpes simplex infection|Epstein-Barr virus infection	Regulation of p27 Phosphorylation during Cell Cycle Progression|Cell Cycle: G1/S Check Point |E2F1 Destruction Pathway
6507	SLC1A3	0	Last Universal Common Ancestor	0	35	4	8	814	0	0	1	Disease|Neuronal System|Transport of small molecules	Disorders of transmembrane transporters|SLC transporter disorders|Defective SLC1A3 causes episodic ataxia 6 (EA6)|Transmission across Chemical Synapses|Neurotransmitter release cycle|Neurotransmitter uptake and metabolism In glial cells|Astrocytic Glutamate-Glutamine Uptake And Metabolism|Glutamate Neurotransmitter Release Cycle|SLC-mediated transmembrane transport|Transport of inorganic cations/…	Organismal Systems	Nervous system	Glutamatergic synapse	Malate-aspartate shuttle
6565	SLC15A2	0	Last Universal Common Ancestor	0	38	NA	3	47	0	0	11	Transport of small molecules	SLC-mediated transmembrane transport|Transport of inorganic cations/anions and amino acids/oligopeptides|Proton/oligopeptide cotransporters	NA	NA	NA	NA
6646	SOAT1	0	Eukaryotes	0.675676	42	15	165	76838	0.0472	0	57	Transport of small molecules	Plasma lipoprotein assembly, remodeling, and clearance|Plasma lipoprotein clearance|LDL clearance	Metabolism|Organismal Systems	Lipid metabolism|Digestive system	Steroid biosynthesis|Cholesterol metabolism	NA
6775	STAT4	0	Eukaryotes	0	37	32	18	2342	0.1307	14	1	Disease|Immune System	Neurodegenerative Diseases|Deregulated CDK5 triggers multiple neurodegenerative pathways in Alzheimer's disease models|Cytokine Signaling in Immune system|Signaling by Interleukins|Interleukin-12 family signaling|Interleukin-2 family signaling|Interleukin-20 family signaling|Interleukin-35 Signalling|Interleukin-12 signaling|Interleukin-23 signaling|Interleukin-21 signaling|Gene and protein expre…	Cellular Processes|Environmental Information Processing|Human Diseases|Organismal Systems	Cell growth and death|Signal transduction|Cancers: Overview|Immune diseases|Infectious diseases: Viral|Immune system	Necroptosis|Jak-STAT signaling pathway|Pathways in cancer|Inflammatory bowel disease (IBD)|Hepatitis B|Th1 and Th2 cell differentiation	IL12 and Stat4 Dependent Signaling Pathway in Th1 Development|NO2-dependent IL 12 Pathway in NK cells
6908	TBP	0	Last Universal Common Ancestor	23.6994	43	41	174	73886	0.0759	63	3	Disease|Gene expression (Transcription)	Infectious disease|HIV Infection|HIV Life Cycle|Late Phase of HIV Life Cycle|Transcription of the HIV genome|HIV Transcription Initiation|RNA Polymerase II HIV Promoter Escape|Epigenetic regulation of gene expression|RNA Polymerase II Transcription|RNA Polymerase I Transcription|RNA Polymerase III Transcription|Generic Transcription Pathway|Positive epigenetic regulation of rRNA expression|Negati…	Genetic Information Processing|Human Diseases	Transcription|Cancers: Overview|Infectious diseases: Viral|Neurodegenerative diseases	Basal transcription factors|Viral carcinogenesis|Human papillomavirus infection|HTLV-I infection|Herpes simplex infection|Epstein-Barr virus infection|Huntington's disease	RNA polymerase III transcription|Nuclear receptors coordinate the activities of chromatin remodeling complexes and coactivators to facilitate initiation of transcription in carcinoma cells|CARM1 and Regulation of the Estrogen Receptor|Chromatin Remodeling by hSWI/SNF ATP-dependent Complexes
6921	ELOC	9	Eukaryotes	21.5569	43	NA	134	64713	0.0524	65	53	Cellular responses to external stimuli|Developmental Biology|Disease|Gene expression (Transcription)|Immune System|Metabolism of proteins	Cellular responses to stress|Cellular response to hypoxia|Regulation of Hypoxia-inducible Factor (HIF) by oxygen|Oxygen-dependent proline hydroxylation of Hypoxia-inducible Factor Alpha|Axon guidance|Signaling by ROBO receptors|Regulation of expression of SLITs and ROBOs|Infectious disease|HIV Infection|HIV Life Cycle|Host Interactions of HIV factors|Late Phase of HIV Life Cycle|Vif-mediated degr…	Environmental Information Processing|Genetic Information Processing|Human Diseases	Signal transduction|Folding, sorting and degradation|Cancers: Overview|Cancers: Specific types	HIF-1 signaling pathway|Ubiquitin mediated proteolysis|Pathways in cancer|Renal cell carcinoma	NA
7049	TGFBR3	0	Metazoans	1.69492	43	27	30	7902	0.0805	1	67	NA	NA	NA	NA	NA	CTCF: First Multivalent Nuclear Factor|ALK in cardiac myocytes|Role of Tob in T-cell activation
7092	TLL1	2	Last Universal Common Ancestor	0	22	NA	3	350	0.3333	0	21	Extracellular matrix organization	Degradation of the extracellular matrix|Collagen formation|Collagen biosynthesis and modifying enzymes|Assembly of collagen fibrils and other multimeric structures|Anchoring fibril formation|Crosslinking of collagen fibrils	NA	NA	NA	NA
7187	TRAF3	0	Metazoans	0	42	30	120	40087	0.0618	22	24	Disease|Immune System|Metabolism of proteins	Diseases of Immune System|Diseases associated with the TLR signaling cascade|TRAF3 deficiency - HSE|Cytokine Signaling in Immune system|Innate Immune System|Toll-Like Receptors Cascades|DDX58/IFIH1-mediated induction of interferon-alpha/beta|TNFR2 non-canonical NF-kB pathway|Toll Like Receptor 4 (TLR4) Cascade|Toll Like Receptor 3 (TLR3) Cascade|TNF receptor superfamily (TNFSF) members mediating …	Environmental Information Processing|Human Diseases|Organismal Systems	Signal transduction|Cancers: Overview|Cancers: Specific types|Infectious diseases: Viral|Immune system	NF-kappa B signaling pathway|TNF signaling pathway|Pathways in cancer|Viral carcinogenesis|Small cell lung cancer|Hepatitis C|Human papillomavirus infection|Kaposi's sarcoma-associated herpesvirus infection|Herpes simplex infection|Epstein-Barr virus infection|Toll-like receptor signaling pathway|NOD-like receptor signaling pathway|RIG-I-like receptor signaling pathway|IL-17 signaling pathway	CD40L Signaling Pathway|TACI and BCMA stimulation of B cell immune responses.|TNFR2 Signaling Pathway
7272	TTK	0	Last Universal Common Ancestor	26.0116	14	38	80	27799	0.0918	0	6	NA	NA	Cellular Processes	Cell growth and death	Cell cycle	NA
7273	TTN	0	Last Universal Common Ancestor	1.13636	8	2	116	67817	0.0699	3	2	Hemostasis|Muscle contraction	Platelet activation, signaling and aggregation|Response to elevated platelet cytosolic Ca2+|Platelet degranulation |Striated Muscle Contraction	Human Diseases	Cardiovascular diseases	Hypertrophic cardiomyopathy (HCM)|Dilated cardiomyopathy (DCM)	NA
7321	UBE2D1	4	Eukaryotes	1.44928	43	33	254	148880	0.0385	22	48	Cell Cycle|Cellular responses to external stimuli|Gene expression (Transcription)|Immune System|Metabolism of proteins|Signal Transduction	Cell Cycle, Mitotic|Cell Cycle Checkpoints|Regulation of mitotic cell cycle|M Phase|Mitotic Spindle Checkpoint|Inhibition of the proteolytic activity of APC/C required for the onset of anaphase by mitotic spindle checkpoint components|APC/C-mediated degradation of cell cycle proteins|Mitotic Metaphase and Anaphase|Inactivation of APC/C via direct inhibition of the APC/C complex|Autodegradation of…	Genetic Information Processing	Folding, sorting and degradation	Ubiquitin mediated proteolysis|Protein processing in endoplasmic reticulum	Neuroregulin receptor degredation protein-1 Controls ErbB3 receptor recycling
7536	SF1	0	Eukaryotes	39.759	43	44	180	68452	0.0621	3	68	Metabolism of RNA	Processing of Capped Intron-Containing Pre-mRNA|mRNA Splicing|mRNA Splicing - Major Pathway	NA	NA	NA	NA
7543	ZFX	1	Last Universal Common Ancestor	29.7143	43	44	6	595	0	0	51	NA	NA	NA	NA	NA	NA
7786	MAP3K12	0	Last Universal Common Ancestor	5.7971	39	37	18	1958	0.1569	0	13	NA	NA	Environmental Information Processing	Signal transduction	MAPK signaling pathway	MAPKinase Signaling Pathway
8202	NCOA3	0	Metazoans	0.564972	43	43	118	51243	0.1237	18	111	Developmental Biology|Metabolism|Signal Transduction	Transcriptional regulation of white adipocyte differentiation|Activation of HOX genes during differentiation|Activation of anterior HOX genes in hindbrain development during early embryogenesis|Metabolism of lipids|Regulation of lipid metabolism by Peroxisome proliferator-activated receptor alpha (PPARalpha)|PPARA activates gene expression|MAPK family signaling cascades|MAPK6/MAPK4 signaling	Human Diseases|Organismal Systems	Cancers: Overview|Cancers: Specific types|Drug resistance: Antineoplastic|Endocrine system	Pathways in cancer|Breast cancer|Endocrine resistance|Thyroid hormone signaling pathway	NA
8406	SRPX	0	Metazoans	0	40	NA	3	14	0.3333	0	1	NA	NA	NA	NA	NA	NA
8437	RASAL1	0	Eukaryotes	1.35135	16	32	4	16	0.1667	1	1	Disease|Signal Transduction	Diseases of signal transduction|Oncogenic MAPK signaling|Signaling by RAS mutants|MAPK family signaling cascades|MAPK1/MAPK3 signaling|RAF/MAP kinase cascade|Regulation of RAS by GAPs	Environmental Information Processing	Signal transduction	Ras signaling pathway	NA
8491	MAP4K3	0	Last Universal Common Ancestor	5.64972	42	24	16	900	0.1333	0	3	NA	NA	Environmental Information Processing	Signal transduction	MAPK signaling pathway	MAPKinase Signaling Pathway
8743	TNFSF10	0	Metazoans	0	43	37	18	1655	0.2222	8	20	Programmed Cell Death|Signal Transduction	Apoptosis|Regulated Necrosis|RIPK1-mediated regulated necrosis|Caspase activation via extrinsic apoptotic signalling pathway|Ligand-dependent caspase activation|Regulation of necroptotic cell death|Regulation by c-FLIP|CASP8 activity is inhibited|Dimerization of procaspase-8|Death Receptor Signalling|TRAIL signaling	Cellular Processes|Environmental Information Processing|Human Diseases|Organismal Systems	Cell growth and death|Signaling molecules and interaction|Signal transduction|Infectious diseases: Viral|Immune system	Apoptosis|Necroptosis|Cytokine-cytokine receptor interaction|FoxO signaling pathway|Measles|Influenza A|Natural killer cell mediated cytotoxicity	Induction of apoptosis through DR3 and DR4/5 Death Receptors
8842	PROM1	0	Metazoans	0	26	26	5	1118	0.1	0	13	NA	NA	Human Diseases	Cancers: Overview	Transcriptional misregulation in cancer	NA
8848	TSC22D1	0	Metazoans	2.25989	43	NA	165	90473	0.0256	2	15	NA	NA	NA	NA	NA	NA
8904	CPNE1	0	Eukaryotes	1.15607	43	30	33	3160	0.1269	1	9	Immune System|Metabolism	Innate Immune System|Neutrophil degranulation|Metabolism of lipids|Phospholipid metabolism|Glycerophospholipid biosynthesis	NA	NA	NA	NA
9053	MAP7	0	Vertebrates	7.35294	39	40	36	7930	0.0508	0	56	NA	NA	NA	NA	NA	NA
9122	SLC16A4	0	Metazoans	0	39	37	2	16	0	0	59	NA	NA	NA	NA	NA	NA
9180	OSMR	0	Vertebrates	0.675676	40	38	11	699	0.3091	4	51	Immune System	Cytokine Signaling in Immune system|Signaling by Interleukins|Interleukin-6 family signaling|IL-6-type cytokine receptor ligand interactions	Environmental Information Processing	Signaling molecules and interaction|Signal transduction	Cytokine-cytokine receptor interaction|PI3K-Akt signaling pathway|Jak-STAT signaling pathway	NA
9201	DCLK1	0	Eukaryotes	0	33	10	78	6912	0.4895	0	1	NA	NA	NA	NA	NA	NA
9542	NRG2	0	Metazoans	0.675676	25	33	2	0	1	18	17	Disease|Signal Transduction	Diseases of signal transduction|PI3K/AKT Signaling in Cancer|Constitutive Signaling by Aberrant PI3K in Cancer|MAPK family signaling cascades|Intracellular signaling by second messengers|Signaling by Non-Receptor Tyrosine Kinases|Signaling by Receptor Tyrosine Kinases|Signaling by ERBB2|Signaling by ERBB4|PIP3 activates AKT signaling|MAPK1/MAPK3 signaling|Signaling by PTK6|SHC1 events in ERBB2 si…	Environmental Information Processing|Human Diseases	Signal transduction|Drug resistance: Antineoplastic	ErbB signaling pathway|EGFR tyrosine kinase inhibitor resistance	g-Secretase mediated ErbB4 Signaling Pathway |Agrin in Postsynaptic Differentiation
9577	BABAM2	0	Eukaryotes	0.568182	43	44	46	6307	0.1488	1	1	Cell Cycle|DNA Repair|Metabolism of proteins	Cell Cycle Checkpoints|G2/M Checkpoints|G2/M DNA damage checkpoint|DNA Double-Strand Break Repair|Homology Directed Repair|Nonhomologous End-Joining (NHEJ)|DNA Double Strand Break Response|Recruitment and ATM-mediated phosphorylation of repair and signaling proteins at DNA double strand breaks|HDR through Homologous Recombination (HR) or Single Strand Annealing (SSA)|Processing of DNA double-stra…	Genetic Information Processing	Replication and repair	Homologous recombination	NA
9584	RBM39	1	Eukaryotes	56.0694	43	42	153	46708	0.1565	1	7	NA	NA	NA	NA	NA	NA
9688	NUP93	0	Eukaryotes	85.8757	43	36	76	10526	0.1102	9	58	Cell Cycle|Cellular responses to external stimuli|Disease|Gene expression (Transcription)|Immune System|Metabolism|Metabolism of proteins|Metabolism of RNA	Cell Cycle, Mitotic|M Phase|Mitotic Prophase|Nuclear Envelope Breakdown|Nuclear Pore Complex (NPC) Disassembly|Cellular responses to stress|Cellular response to heat stress|Regulation of HSF1-mediated heat shock response|Infectious disease|HIV Infection|Influenza Infection|HIV Life Cycle|Host Interactions of HIV factors|Host Interactions with Influenza Factors|Influenza Life Cycle|Late Phase of H…	Genetic Information Processing	Translation	RNA transport	NA
9723	SEMA3E	0	Vertebrates	0	14	NA	1	0	0	1	58	Developmental Biology	Axon guidance|Semaphorin interactions|Other semaphorin interactions	Organismal Systems	Development	Axon guidance	NA
9730	DCAF1	0	Eukaryotes	47.561	43	44	107	30459	0.0938	2	2	Immune System	Adaptive Immune System|Class I MHC mediated antigen processing & presentation|Antigen processing: Ubiquitination & Proteasome degradation	NA	NA	NA	NA
9839	ZEB2	0	Metazoans	15.9091	43	16	25	1555	0.3	9	29	NA	NA	Human Diseases	Cancers: Overview	MicroRNAs in cancer	NA
9887	SMG7	0	Eukaryotes	25.2874	43	31	35	5293	0.1681	0	29	Metabolism of RNA	Nonsense-Mediated Decay (NMD)|Nonsense Mediated Decay (NMD) enhanced by the Exon Junction Complex (EJC)	Genetic Information Processing	Translation	mRNA surveillance pathway	NA
9971	NR1H4	0	Eukaryotes	0	12	NA	29	679	0.2463	1	2	Gene expression (Transcription)|Metabolism	RNA Polymerase II Transcription|Generic Transcription Pathway|Nuclear Receptor transcription pathway|Biological oxidations|Metabolism of lipids|Phase I - Functionalization of compounds|Regulation of lipid metabolism by Peroxisome proliferator-activated receptor alpha (PPARalpha)|Metabolism of steroids|Bile acid and bile salt metabolism|PPARA activates gene expression|Cytochrome P450 - arranged by…	Organismal Systems	Digestive system	Bile secretion	FXR and LXR Regulation of Cholesterol Metabolism|Nuclear Receptors in Lipid Metabolism and Toxicity
10016	PDCD6	0	Eukaryotes	3.38983	43	NA	106	38333	0.0911	2	3	NA	NA	NA	NA	NA	NA
10137	RBM12	0	Eukaryotes	20.8955	43	40	44	11244	0.0751	0	12	NA	NA	NA	NA	NA	NA
10231	RCAN2	0	Opisthokonts	0	40	30	21	2360	0.0524	2	31	NA	NA	Organismal Systems	Endocrine system	Thyroid hormone signaling pathway	NA
10395	DLC1	0	Eukaryotes	0.564972	42	11	47	5489	0.0324	2	80	Signal Transduction	Signaling by Rho GTPases|Rho GTPase cycle	NA	NA	NA	NA
10430	TMEM147	0	Eukaryotes	15.7895	43	NA	11	1278	0	1	3	NA	NA	NA	NA	NA	NA
10492	SYNCRIP	2	Eukaryotes	10.8571	43	44	307	245656	0.0711	6	81	NA	NA	NA	NA	NA	NA
10693	CCT6B	2	Eukaryotes	0	38	NA	106	27830	0.0979	8	2	Metabolism of proteins	Protein folding|Chaperonin-mediated protein folding|Cooperation of Prefoldin and TriC/CCT in actin and tubulin folding|Association of TriC/CCT with target proteins during biosynthesis|Cooperation of PDCL (PhLP1) and TRiC/CCT in G-protein beta folding|Prefoldin mediated transfer of substrate to CCT/TriC|Formation of tubulin folding intermediates by CCT/TriC|Folding of actin by CCT/TriC	NA	NA	NA	NA
10788	IQGAP2	0	Eukaryotes	7.42857	40	38	19	917	0.0643	6	8	Immune System|Signal Transduction	Innate Immune System|Neutrophil degranulation|Signaling by Rho GTPases|RHO GTPase Effectors|RHO GTPases activate IQGAPs	Cellular Processes	Cell motility	Regulation of actin cytoskeleton	NA
10811	NOXA1	0	Eukaryotes	2.72109	43	29	16	10960	0.05	3	0	Signal Transduction	Signaling by Rho GTPases|RHO GTPase Effectors|RHO GTPases Activate NADPH Oxidases	NA	NA	NA	NA
11228	RASSF8	0	Metazoans	0.568182	41	44	47	7762	0.0842	0	27	NA	NA	NA	NA	NA	NA
22806	IKZF3	0	Last Universal Common Ancestor	0	15	4	108	44676	0.046	2	132	NA	NA	NA	NA	NA	IL-2 Receptor Beta Chain in T cell Activation
22992	KDM2A	0	Eukaryotes	25	43	44	33	5619	0.072	3	57	Chromatin organization	Chromatin modifying enzymes|HDMs demethylate histones	NA	NA	NA	NA
22995	CEP152	0	Metazoans	2.75862	36	26	111	13877	0.0906	13	10	Cell Cycle|Organelle biogenesis and maintenance	Cell Cycle, Mitotic|Mitotic G2-G2/M phases|M Phase|Mitotic Prometaphase|G2/M Transition|Regulation of PLK1 Activity at G2/M Transition|Centrosome maturation|Recruitment of NuMA to mitotic centrosomes|AURKA Activation by TPX2|Recruitment of mitotic centrosome proteins and complexes|Loss of proteins required for interphase microtubule organization from the centrosome|Loss of Nlp from mitotic centro…	NA	NA	NA	NA
22999	RIMS1	0	Vertebrates	0	7	NA	24	4059	0.087	7	0	Neuronal System	Transmission across Chemical Synapses|Neurotransmitter release cycle|Serotonin Neurotransmitter Release Cycle|Norepinephrine Neurotransmitter Release Cycle|Glutamate Neurotransmitter Release Cycle|Dopamine Neurotransmitter Release Cycle|Acetylcholine Neurotransmitter Release Cycle|GABA synthesis, release, reuptake and degradation	Organismal Systems	Nervous system	Synaptic vesicle cycle|Retrograde endocannabinoid signaling	NA
23019	CNOT1	0	Eukaryotes	33.908	43	44	90	42255	0.1021	6	15	Gene expression (Transcription)|Metabolism of RNA	RNA Polymerase II Transcription|Generic Transcription Pathway|Transcriptional Regulation by TP53|TP53 Regulates Transcription of Cell Cycle Genes|TP53 regulates transcription of additional cell cycle genes whose exact role in the p53 pathway remain uncertain|Deadenylation-dependent mRNA decay|Deadenylation of mRNA	Genetic Information Processing	Folding, sorting and degradation	RNA degradation	NA
23046	KIF21B	0	Eukaryotes	1.44928	29	43	30	2195	0.0483	1	23	Hemostasis|Vesicle-mediated transport	Factors involved in megakaryocyte development and platelet production|Kinesins|Membrane Trafficking|Intra-Golgi and retrograde Golgi-to-ER traffic|Golgi-to-ER retrograde transport|COPI-dependent Golgi-to-ER retrograde traffic	NA	NA	NA	NA
23314	SATB2	0	Vertebrates	1.69492	29	6	46	7535	0.0415	1	77	Gene expression (Transcription)|Metabolism of proteins	RNA Polymerase II Transcription|Generic Transcription Pathway|Transcriptional regulation by RUNX2|RUNX2 regulates bone development|RUNX2 regulates osteoblast differentiation|Post-translational protein modification|SUMOylation|SUMO E3 ligases SUMOylate target proteins|SUMOylation of chromatin organization proteins	NA	NA	NA	NA
23592	LEMD3	0	Eukaryotes	11.5942	43	43	47	23286	0.0287	4	6	Cell Cycle	Cell Cycle, Mitotic|M Phase|Mitotic Metaphase and Anaphase|Mitotic Prophase|Nuclear Envelope Breakdown|Mitotic Anaphase|Clearance of Nuclear Envelope Membranes from Chromatin|Nuclear Envelope Reassembly|Depolymerisation of the Nuclear Lamina|Initiation of Nuclear Envelope Reformation	NA	NA	NA	NA
23743	BHMT2	0	Last Universal Common Ancestor	0	37	2	4	1429	0	0	66	Metabolism	Metabolism of amino acids and derivatives|Sulfur amino acid metabolism	Metabolism	Amino acid metabolism|Global and overview maps	Cysteine and methionine metabolism|Metabolic pathways	NA
25942	SIN3A	0	Eukaryotes	28.3237	43	42	214	103002	0.0777	70	44	Gene expression (Transcription)|Hemostasis|Metabolism	Epigenetic regulation of gene expression|RNA Polymerase II Transcription|Generic Transcription Pathway|Negative epigenetic regulation of rRNA expression|NoRC negatively regulates rRNA expression|Transcriptional regulation by RUNX1|RUNX1 regulates genes involved in megakaryocyte differentiation and platelet function|Factors involved in megakaryocyte development and platelet production|Metabolism o…	Human Diseases|Organismal Systems	Cancers: Overview|Neurodegenerative diseases|Endocrine system	Transcriptional misregulation in cancer|Huntington's disease|Thyroid hormone signaling pathway	METS affect on Macrophage Differentiation
25988	HINFP	0	Metazoans	98.5507	43	28	37	3975	0.0345	0	43	NA	NA	NA	NA	NA	NA
26137	ZBTB20	0	Last Universal Common Ancestor	0.675676	15	35	14	274	0.3736	0	114	NA	NA	NA	NA	NA	NA
26191	PTPN22	0	Last Universal Common Ancestor	4.96894	27	43	48	9234	0.0789	1	3	Immune System	Adaptive Immune System|TCR signaling|Phosphorylation of CD3 and TCR zeta chains|Translocation of ZAP-70 to Immunological synapse	NA	NA	NA	NA
26762	HAVCR1	1	Vertebrates	0	3	29	2	162	0	0	51	NA	NA	NA	NA	NA	NA
26953	RANBP6	0	Eukaryotes	0.564972	43	42	61	36706	0.0322	0	53	NA	NA	NA	NA	NA	NA
27316	RBMX	7	Eukaryotes	44.8276	43	44	145	39876	0.1476	14	3	Metabolism of RNA	Processing of Capped Intron-Containing Pre-mRNA|mRNA Splicing|mRNA Splicing - Major Pathway	Genetic Information Processing	Transcription	Spliceosome	NA
29781	NCAPH2	0	Eukaryotes	57.3529	43	44	101	31743	0.0305	7	2	Cell Cycle	Cell Cycle, Mitotic|M Phase|Mitotic Prophase|Condensation of Prophase Chromosomes	NA	NA	NA	NA
29993	PACSIN1	0	Opisthokonts	2.4	11	4	43	4513	0.0764	7	53	Vesicle-mediated transport	Membrane Trafficking|Clathrin-mediated endocytosis	NA	NA	NA	NA
50937	CDON	2	Metazoans	2.05479	32	NA	10	658	0.1333	1	22	Developmental Biology|Signal Transduction	Myogenesis|CDO in myogenesis|Signaling by Hedgehog|Hedgehog 'on' state|Ligand-receptor interactions|Activation of SMO	Environmental Information Processing	Signal transduction	Hedgehog signaling pathway	NA
51259	TMEM216	0	Metazoans	0	42	NA	244	201070	0.0135	1	47	Organelle biogenesis and maintenance	Cilium Assembly|Anchoring of the basal body to the plasma membrane	NA	NA	NA	NA
51441	YTHDF2	1	Eukaryotes	34.3284	43	41	40	4007	0.2192	0	3	NA	NA	NA	NA	NA	NA
51604	PIGT	0	Eukaryotes	0.568182	43	NA	36	9738	0.1206	4	3	Metabolism of proteins	Post-translational protein modification|Post-translational modification: synthesis of GPI-anchored proteins|Attachment of GPI anchor to uPAR	Metabolism	Global and overview maps|Glycan biosynthesis and metabolism	Metabolic pathways|Glycosylphosphatidylinositol (GPI)-anchor biosynthesis	NA
53942	CNTN5	0	Metazoans	0	2	44	2	2	0	0	0	Metabolism of proteins	Post-translational protein modification|Post-translational modification: synthesis of GPI-anchored proteins	NA	NA	NA	NA
54825	CDHR2	0	Last Universal Common Ancestor	0	10	23	4	642	0.5	0	1	NA	NA	NA	NA	NA	NA
55117	SLC6A15	0	Last Universal Common Ancestor	0	6	20	27	3989	0.0427	0	3	Transport of small molecules	SLC-mediated transmembrane transport|Transport of bile salts and organic acids, metal ions and amine compounds|Transport of inorganic cations/anions and amino acids/oligopeptides|Amino acid transport across the plasma membrane|Na+/Cl- dependent neurotransmitter transporters	NA	NA	NA	NA
55781	RIOK2	0	Last Universal Common Ancestor	28.4024	43	39	27	2231	0.114	1	6	Metabolism of RNA	rRNA processing|rRNA processing in the nucleus and cytosol|Major pathway of rRNA processing in the nucleolus and cytosol	Genetic Information Processing	Translation	Ribosome biogenesis in eukaryotes	NA
56288	PARD3	0	Metazoans	0	41	29	81	27286	0.1019	14	67	Cell-Cell communication|Signal Transduction	Cell junction organization|Cell-cell junction organization|Tight junction interactions|Signaling by TGF-beta family members|Signaling by TGF-beta Receptor Complex|TGF-beta receptor signaling in EMT (epithelial to mesenchymal transition)	Cellular Processes|Environmental Information Processing|Human Diseases|Organismal Systems	Cellular community - eukaryotes|Transport and catabolism|Signaling molecules and interaction|Signal transduction|Infectious diseases: Viral|Development|Immune system	Adherens junction|Tight junction|Endocytosis|Neuroactive ligand-receptor interaction|Rap1 signaling pathway|Hippo signaling pathway|Human papillomavirus infection|Axon guidance|Chemokine signaling pathway	NA
56652	TWNK	0	Last Universal Common Ancestor	37.8698	43	24	33	2808	0.0152	0	12	Organelle biogenesis and maintenance	Mitochondrial biogenesis|Transcriptional activation of mitochondrial biogenesis	NA	NA	NA	NA
57127	RHBG	0	Eukaryotes	0.740741	3	11	1	0	0	1	0	Transport of small molecules	SLC-mediated transmembrane transport|Transport of bile salts and organic acids, metal ions and amine compounds|Rhesus glycoproteins mediate ammonium transport.	NA	NA	NA	NA
57176	VARS2	0	Last Universal Common Ancestor	79.7101	31	44	10	274	0.0222	1	0	Metabolism of proteins	Translation|tRNA Aminoacylation|Mitochondrial tRNA aminoacylation	Genetic Information Processing	Translation	Aminoacyl-tRNA biosynthesis	NA
57466	SCAF4	0	Vertebrates	3.68098	43	44	32	3895	0.0806	0	17	NA	NA	NA	NA	NA	NA
57678	GPAM	0	Last Universal Common Ancestor	0	42	4	9	727	0.1111	2	31	Gene expression (Transcription)|Metabolism	RNA Polymerase II Transcription|Generic Transcription Pathway|Transcriptional regulation by RUNX1|RUNX1 regulates estrogen receptor mediated transcription|Metabolism of lipids|Phospholipid metabolism|Metabolism of steroids|Triglyceride metabolism|Glycerophospholipid biosynthesis|Regulation of cholesterol biosynthesis by SREBP (SREBF)|Triglyceride biosynthesis|Synthesis of PA|Activation of gene ex…	Metabolism	Global and overview maps|Lipid metabolism	Metabolic pathways|Glycerolipid metabolism|Glycerophospholipid metabolism	NA
57680	CHD8	0	Last Universal Common Ancestor	21.7143	43	NA	58	9527	0.0714	3	15	Signal Transduction	Signaling by WNT|TCF dependent signaling in response to WNT|Deactivation of the beta-catenin transactivating complex	Environmental Information Processing	Signal transduction	Wnt signaling pathway	NA
60494	CCDC81	0	Opisthokonts	0.564972	11	NA	0	0	NA	0	4	NA	NA	NA	NA	NA	NA
65220	NADK	0	Last Universal Common Ancestor	3.9548	43	36	63	5080	0.6083	0	2	Metabolism	Metabolism of vitamins and cofactors|Metabolism of water-soluble vitamins and cofactors|Nicotinate metabolism	Metabolism	Global and overview maps|Metabolism of cofactors and vitamins	Metabolic pathways|Nicotinate and nicotinamide metabolism	NA
79759	ZNF668	0	Last Universal Common Ancestor	0.606061	40	44	27	1497	0.2108	1	1	Gene expression (Transcription)	RNA Polymerase II Transcription|Generic Transcription Pathway	NA	NA	NA	NA
79892	MCMBP	0	Eukaryotes	83.7838	43	38	55	13501	0.0835	0	27	NA	NA	NA	NA	NA	NA
80829	ZFP91	0	Last Universal Common Ancestor	4.54545	43	44	27	2537	0.0513	1	78	NA	NA	NA	NA	NA	NA
81501	DCSTAMP	0	Metazoans	0	2	NA	2	0	1	1	3	Metabolism of proteins	Unfolded Protein Response (UPR)|CREB3 factors activate genes	NA	NA	NA	NA
81704	DOCK8	0	Eukaryotes	0.564972	39	34	44	7480	0.0444	2	0	Hemostasis	Factors involved in megakaryocyte development and platelet production	NA	NA	NA	NA
81831	NETO2	1	Metazoans	5.08475	23	40	32	11510	0.0323	0	43	NA	NA	NA	NA	NA	NA
81839	VANGL1	0	Metazoans	0	39	33	42	11411	0.0685	1	47	NA	NA	Environmental Information Processing	Signal transduction	Wnt signaling pathway	NA
83737	ITCH	0	Last Universal Common Ancestor	0.564972	43	44	176	78914	0.0645	30	23	Gene expression (Transcription)|Immune System|Signal Transduction	RNA Polymerase II Transcription|Generic Transcription Pathway|Transcriptional regulation by RUNX1|RUNX1 regulates transcription of genes involved in differentiation of HSCs|Adaptive Immune System|Innate Immune System|Nucleotide-binding domain, leucine rich repeat containing receptor (NLR) signaling pathways|DDX58/IFIH1-mediated induction of interferon-alpha/beta|Class I MHC mediated antigen proce…	Cellular Processes|Environmental Information Processing|Genetic Information Processing|Human Diseases	Transport and catabolism|Signal transduction|Folding, sorting and degradation|Endocrine and metabolic diseases	Endocytosis|TNF signaling pathway|Ubiquitin mediated proteolysis|Non-alcoholic fatty liver disease (NAFLD)	NA
84107	ZIC4	0	Last Universal Common Ancestor	0.694444	1	19	2	2	0	0	11	NA	NA	NA	NA	NA	NA
84159	ARID5B	0	Metazoans	6.25	43	42	14	723	0.1648	1	78	Chromatin organization	Chromatin modifying enzymes|HDMs demethylate histones	NA	NA	NA	NA
84725	PLEKHA8	1	Eukaryotes	0	40	NA	6	111	0.1333	1	40	Metabolism	Metabolism of lipids|Phospholipid metabolism|PI Metabolism|Synthesis of PIPs at the plasma membrane	NA	NA	NA	NA
89796	NAV1	0	Vertebrates	1.69492	40	43	59	8573	0.3553	0	106	NA	NA	NA	NA	NA	NA
90060	CCDC120	0	Eukaryotes	2.89855	39	NA	61	24372	0.0355	0	20	NA	NA	NA	NA	NA	NA
91156	IGFN1	0	Last Universal Common Ancestor	5.40541	9	1	2	27	0	0	1	NA	NA	NA	NA	NA	NA
91181	NUP210L	0	Eukaryotes	3.40909	1	1	2	1	0	0	0	NA	NA	Genetic Information Processing	Translation	RNA transport	NA
93649	MYOCD	0	Vertebrates	2.02703	26	43	16	16783	0.2417	1	77	NA	NA	NA	NA	NA	NA
114907	FBXO32	0	Metazoans	1.44928	41	NA	17	395	0.1544	8	7	Immune System|Metabolism of proteins	Adaptive Immune System|Class I MHC mediated antigen processing & presentation|Antigen processing: Ubiquitination & Proteasome degradation|Post-translational protein modification|Neddylation	Environmental Information Processing	Signal transduction	FoxO signaling pathway	NA
115350	FCRL1	0	Vertebrates	0	6	7	1	0	0	0	0	NA	NA	NA	NA	NA	NA
116441	TM4SF18	0	Vertebrates	4.54545	40	22	6	103	0	0	8	NA	NA	NA	NA	NA	NA
125336	LOXHD1	0	Last Universal Common Ancestor	0	5	NA	2	8	0	0	1	NA	NA	NA	NA	NA	NA
128553	TSHZ2	0	Metazoans	0.568182	36	43	3	40	0	0	34	NA	NA	NA	NA	NA	NA
132884	EVC2	0	Metazoans	2.27273	30	44	85	13259	0.0176	2	17	Signal Transduction	Signaling by Hedgehog|Hedgehog 'on' state|Activation of SMO	Environmental Information Processing	Signal transduction	Hedgehog signaling pathway	NA
138639	PTPDC1	0	Last Universal Common Ancestor	0	39	42	36	3067	0.0714	0	67	NA	NA	NA	NA	NA	NA
139804	RBMXL3	0	Primates	4.34783	1	1	2	0	0	0	0	NA	NA	Genetic Information Processing	Transcription	Spliceosome	NA
147184	TMEM99	0	Primates	0	42	NA	1	0	0	0	1	NA	NA	NA	NA	NA	NA
147991	DPY19L3	0	Opisthokonts	0	42	43	8	841	0	0	41	NA	NA	NA	NA	NA	NA
148327	CREB3L4	0	Opisthokonts	2.02703	43	44	8	1449	0.0714	0	0	Metabolism of proteins	Unfolded Protein Response (UPR)|CREB3 factors activate genes	Environmental Information Processing|Human Diseases|Organismal Systems	Signal transduction|Cancers: Overview|Cancers: Specific types|Endocrine and metabolic diseases|Infectious diseases: Viral|Neurodegenerative diseases|Substance dependence|Aging|Circulatory system|Endocrine system|Excretory system|Nervous system	cGMP-PKG signaling pathway|cAMP signaling pathway|PI3K-Akt signaling pathway|AMPK signaling pathway|TNF signaling pathway|Viral carcinogenesis|Prostate cancer|Insulin resistance|Hepatitis B|Human papillomavirus infection|Huntington's disease|Cocaine addiction|Amphetamine addiction|Alcoholism|Longevity regulating pathway|Adrenergic signaling in cardiomyocytes|Insulin secretion|Estrogen signaling p…	NA
148345	C1orf127	0	Mammals	0	1	NA	2	0	1	0	0	NA	NA	NA	NA	NA	NA
151254	C2CD6	0	Metazoans	3.42857	1	NA	18	606	0.0588	0	0	NA	NA	NA	NA	NA	NA
152330	CNTN4	0	Metazoans	0	31	NA	6	239	0.2	0	13	Metabolism of proteins	Post-translational protein modification|Post-translational modification: synthesis of GPI-anchored proteins	NA	NA	NA	NA
162968	ZNF497	0	Last Universal Common Ancestor	0	32	NA	1	0	0	0	0	NA	NA	NA	NA	NA	NA
166824	RASSF6	0	Vertebrates	8.69565	22	27	8	633	0.1071	0	24	NA	NA	Environmental Information Processing	Signal transduction	Hippo signaling pathway|Hippo signaling pathway - multiple species	NA
169966	FAM46D	0	Opisthokonts	5.7971	1	NA	2	2	0	0	2	NA	NA	NA	NA	NA	NA
221074	SLC39A12	0	Last Universal Common Ancestor	0	2	NA	67	15462	0.0027	0	1	NA	NA	NA	NA	NA	NA
223075	CCDC129	0	Vertebrates	0	4	NA	0	0	NA	0	0	NA	NA	NA	NA	NA	NA
259173	ALS2CL	0	Last Universal Common Ancestor	13.8889	35	33	1	0	0	0	15	Vesicle-mediated transport	Membrane Trafficking|Rab regulation of trafficking|RAB GEFs exchange GTP for GDP on RABs	NA	NA	NA	NA
259266	ASPM	0	Eukaryotes	5.08475	13	44	70	17556	0.019	0	6	NA	NA	NA	NA	NA	NA
284058	KANSL1	0	Metazoans	23.9766	43	42	47	9923	0.0731	4	105	Chromatin organization	Chromatin modifying enzymes|HATs acetylate histones	NA	NA	NA	NA
286499	FAM133A	3	Metazoans	1.44928	4	NA	8	89	0.0714	0	2	NA	NA	NA	NA	NA	NA
340273	ABCB5	0	Last Universal Common Ancestor	0.564972	5	NA	3	8	0.3333	0	29	Transport of small molecules	ABC-family proteins mediated transport	Environmental Information Processing	Membrane transport	ABC transporters	NA
374897	SBSN	0	Eukaryotes	2.89855	6	6	17	1116	0.0294	0	1	NA	NA	NA	NA	NA	NA
643677	CCDC168	0	Mammals	12.069	1	NA	2	4	0	0	0	NA	NA	NA	NA	NA	NA
728276	CLEC19A	0	-	1.1976	0	NA	0	0	NA	0	0	NA	NA	NA	NA	NA	NA
100423062	IGLL5	1	Vertebrates	2.7027	18	NA	19	16151	0.0468	0	0	NA	NA	NA	NA	NA	NA
48	ACO1	0	Last Universal Common Ancestor	0	43	28	25	4928	0.1033	1	20	Transport of small molecules	Iron uptake and transport	Metabolism	Carbohydrate metabolism|Global and overview maps	Citrate cycle (TCA cycle)|Glyoxylate and dicarboxylate metabolism|Metabolic pathways|Carbon metabolism|2-Oxocarboxylic acid metabolism|Biosynthesis of amino acids	NA
107	ADCY1	0	Last Universal Common Ancestor	2.95858	21	NA	2	125	0	7	5	Metabolism|Neuronal System|Signal Transduction|Transport of small molecules	Integration of energy metabolism|Glucagon signaling in metabolic regulation|PKA activation in glucagon signalling|Transmission across Chemical Synapses|Neurotransmitter receptors and postsynaptic signal transmission|Activation of NMDA receptor and postsynaptic events|GABA receptor activation|Post NMDA receptor activation events|GABA B receptor activation|CREB phosphorylation through the activatio…	Cellular Processes|Environmental Information Processing|Human Diseases|Metabolism|Organismal Systems	Cell growth and death|Cellular community - eukaryotes|Signal transduction|Cancers: Overview|Cardiovascular diseases|Drug resistance: Antineoplastic|Infectious diseases: Parasitic|Infectious diseases: Viral|Substance dependence|Nucleotide metabolism|Aging|Circulatory system|Digestive system|Endocrine system|Environmental adaptation|Immune system|Nervous system|Sensory system	Oocyte meiosis|Gap junction|Rap1 signaling pathway|Calcium signaling pathway|cGMP-PKG signaling pathway|cAMP signaling pathway|Phospholipase D signaling pathway|Apelin signaling pathway|Pathways in cancer|Dilated cardiomyopathy (DCM)|Endocrine resistance|Chagas disease (American trypanosomiasis)|Amoebiasis|HTLV-I infection|Morphine addiction|Purine metabolism|Longevity regulating pathway|Longevit…	Activation of Csk by cAMP-dependent Protein Kinase Inhibits Signaling through the T Cell Receptor|Cystic fibrosis transmembrane conductance regulator (CFTR) and beta 2 adrenergic receptor (b2AR) pathway|Phospholipase C-epsilon pathway|Transcription factor CREB and its extracellular signals|Ion Channels and Their Functional Role in Vascular Endothelium|Thrombin signaling and protease-activated rec…
688	KLF5	0	Last Universal Common Ancestor	1.20482	41	42	51	6452	0.2494	0	10	Developmental Biology	Transcriptional regulation of white adipocyte differentiation	NA	NA	NA	NA
912	CD1D	0	Vertebrates	0	32	18	7	177	0.1429	7	39	Immune System	Adaptive Immune System|Immunoregulatory interactions between a Lymphoid and a non-Lymphoid cell	Cellular Processes|Human Diseases|Organismal Systems	Cellular community - eukaryotes|Infectious diseases: Parasitic|Immune system	Tight junction|Amoebiasis|Hematopoietic cell lineage	NA
995	CDC25C	0	Eukaryotes	0	11	40	105	25254	0.2194	1	4	Cell Cycle|Disease|Gene expression (Transcription)|Signal Transduction	Cell Cycle, Mitotic|Cell Cycle Checkpoints|Mitotic G2-G2/M phases|G2/M Checkpoints|Activation of ATR in response to replication stress|G2/M Transition|G2/M DNA damage checkpoint|Polo-like kinase mediated events|Cyclin A/B1/B2 associated events during G2/M transition|Chk1/Chk2(Cds1) mediated inactivation of Cyclin B:Cdk1 complex|Neurodegenerative Diseases|Deregulated CDK5 triggers multiple neurode…	Cellular Processes|Human Diseases|Organismal Systems	Cell growth and death|Cancers: Overview|Endocrine system	Cell cycle|Oocyte meiosis|MicroRNAs in cancer|Progesterone-mediated oocyte maturation	How Progesterone Initiates the Oocyte Maturation|cdc25 and chk1 Regulatory Pathway in response to DNA damage|Activation of Src by Protein-tyrosine phosphatase alpha|Cell Cycle: G2/M Checkpoint|Regulation of cell cycle progression by Plk3|Sonic Hedgehog (SHH) Receptor Ptc1 Regulates cell cycle|RB Tumor Suppressor/Checkpoint Signaling in response to DNA damage
1000	CDH2	0	Last Universal Common Ancestor	1.12994	30	14	70	13340	0.0878	5	24	Cell-Cell communication|Developmental Biology|Metabolism of proteins	Cell junction organization|Cell-cell junction organization|Adherens junctions interactions|Myogenesis|CDO in myogenesis|Regulation of Insulin-like Growth Factor (IGF) transport and uptake by Insulin-like Growth Factor Binding Proteins (IGFBPs)|Post-translational protein modification|Post-translational protein phosphorylation	Environmental Information Processing|Human Diseases	Signaling molecules and interaction|Cardiovascular diseases	Cell adhesion molecules (CAMs)|Arrhythmogenic right ventricular cardiomyopathy (ARVC)	NA
1010	CDH12	0	Last Universal Common Ancestor	0	2	NA	3	8	0	2	12	Cell-Cell communication	Cell junction organization|Cell-cell junction organization|Adherens junctions interactions	NA	NA	NA	NA
1113	CHGA	0	Vertebrates	9.52381	13	14	11	1011	0.0909	1	1	Immune System	Innate Immune System|Antimicrobial peptides	NA	NA	NA	NA
1282	COL4A1	0	Last Universal Common Ancestor	0	41	21	32	9711	0.0988	21	41	Developmental Biology|Extracellular matrix organization|Signal Transduction|Vesicle-mediated transport	Axon guidance|NCAM signaling for neurite out-growth|NCAM1 interactions|Degradation of the extracellular matrix|Collagen formation|Integrin cell surface interactions|Laminin interactions|Non-integrin membrane-ECM interactions|ECM proteoglycans|Collagen degradation|Collagen biosynthesis and modifying enzymes|Assembly of collagen fibrils and other multimeric structures|Anchoring fibril formation|Cro…	Cellular Processes|Environmental Information Processing|Human Diseases|Organismal Systems	Cellular community - eukaryotes|Signaling molecules and interaction|Signal transduction|Cancers: Overview|Cancers: Specific types|Endocrine and metabolic diseases|Infectious diseases: Parasitic|Infectious diseases: Viral|Digestive system|Endocrine system	Focal adhesion|ECM-receptor interaction|PI3K-Akt signaling pathway|Pathways in cancer|Small cell lung cancer|AGE-RAGE signaling pathway in diabetic complications|Amoebiasis|Human papillomavirus infection|Protein digestion and absorption|Relaxin signaling pathway	Regulators of Bone Mineralization|Vitamin C in the Brain|Angiotensin-converting enzyme 2 regulates heart function|Platelet Amyloid Precursor Protein Pathway|Intrinsic Prothrombin Activation Pathway|Acute Myocardial Infarction
1460	CSNK2B	0	Eukaryotes	31.9767	42	44	289	294548	0.0375	11	0	Cell Cycle|Developmental Biology|Gene expression (Transcription)|Immune System|Metabolism|Metabolism of proteins|Mitophagy|Signal Transduction	Cell Cycle, Mitotic|M Phase|Mitotic Prometaphase|Condensation of Prometaphase Chromosomes|Axon guidance|L1CAM interactions|Signal transduction by L1|RNA Polymerase II Transcription|Generic Transcription Pathway|Transcriptional Regulation by TP53|Transcriptional regulation by RUNX1|Regulation of TP53 Activity|RUNX1 interacts with co-factors whose precise effect on RUNX1 targets is not known|Regula…	Cellular Processes|Environmental Information Processing|Genetic Information Processing|Human Diseases	Cellular community - eukaryotes|Transport and catabolism|Signal transduction|Translation|Infectious diseases: Viral	Adherens junction|Mitophagy - animal|NF-kappa B signaling pathway|Wnt signaling pathway|Ribosome biogenesis in eukaryotes|Measles|Herpes simplex infection|Epstein-Barr virus infection	NA
1495	CTNNA1	2	Metazoans	0.568182	43	44	106	41849	0.0906	10	6	Cell-Cell communication|Developmental Biology|Signal Transduction	Cell junction organization|Cell-cell junction organization|Adherens junctions interactions|Myogenesis|CDO in myogenesis|Signaling by Rho GTPases|Signaling by Receptor Tyrosine Kinases|Signaling by VEGF|RHO GTPase Effectors|VEGFA-VEGFR2 Pathway|RHO GTPases activate IQGAPs|VEGFR2 mediated vascular permeability	Cellular Processes|Environmental Information Processing|Human Diseases|Organismal Systems	Cellular community - eukaryotes|Signal transduction|Cancers: Overview|Cancers: Specific types|Cardiovascular diseases|Infectious diseases: Bacterial|Immune system	Adherens junction|Hippo signaling pathway|Pathways in cancer|Endometrial cancer|Gastric cancer|Arrhythmogenic right ventricular cardiomyopathy (ARVC)|Bacterial invasion of epithelial cells|Leukocyte transendothelial migration	Cell to Cell Adhesion Signaling
1901	S1PR1	0	Vertebrates	0	43	41	33	31229	0.053	8	29	Immune System|Signal Transduction	Cytokine Signaling in Immune system|Signaling by Interleukins|Interleukin-4 and 13 signaling|Signaling by GPCR|GPCR downstream signalling|GPCR ligand binding|Class A/1 (Rhodopsin-like receptors)|G alpha (i) signalling events|Lysosphingolipid and LPA receptors	Environmental Information Processing	Signaling molecules and interaction|Signal transduction	Neuroactive ligand-receptor interaction|FoxO signaling pathway|Sphingolipid signaling pathway	Phospholipids as signalling intermediaries
2043	EPHA4	0	Last Universal Common Ancestor	3.9548	39	26	49	19607	0.0468	3	74	Developmental Biology	Axon guidance|EPH-Ephrin signaling|EPHA-mediated growth cone collapse|EPH-ephrin mediated repulsion of cells	Organismal Systems	Development	Axon guidance	Eph Kinases and ephrins support platelet aggregation
2044	EPHA5	0	Last Universal Common Ancestor	1.69492	5	NA	10	729	0.0222	3	14	Developmental Biology	Axon guidance|EPH-Ephrin signaling|EPHA-mediated growth cone collapse|EPH-ephrin mediated repulsion of cells	Organismal Systems	Development	Axon guidance	NA
2051	EPHB6	0	Last Universal Common Ancestor	0	31	NA	23	2801	0.1028	14	0	Developmental Biology	Axon guidance|EPH-Ephrin signaling|EPHB-mediated forward signaling|Ephrin signaling|EPH-ephrin mediated repulsion of cells	Organismal Systems	Development	Axon guidance	NA
2077	ERF	0	Last Universal Common Ancestor	4.21687	43	35	32	7112	0.0685	1	4	Cellular responses to external stimuli	Cellular responses to stress|Cellular Senescence|Oncogene Induced Senescence	NA	NA	NA	NA
2125	EVPL	0	Vertebrates	0	30	19	36	19935	0.0905	3	0	Developmental Biology	Keratinization|Formation of the cornified envelope	NA	NA	NA	NA
2145	EZH1	0	Last Universal Common Ancestor	0	43	33	9	23	0.5278	0	15	NA	NA	Metabolism	Amino acid metabolism	Lysine degradation	The PRC2 Complex Sets Long-term Gene Silencing Through Modification of Histone Tails
2196	FAT2	0	Last Universal Common Ancestor	7.38636	10	7	0	0	NA	0	7	NA	NA	NA	NA	NA	NA
2250	FGF5	0	Metazoans	1.14286	3	NA	6	47	0.1333	0	30	Disease|Signal Transduction	Diseases of signal transduction|Signaling by FGFR in disease|PI3K/AKT Signaling in Cancer|Constitutive Signaling by Aberrant PI3K in Cancer|Signaling by FGFR2 in disease|Signaling by FGFR1 in disease|Signaling by FGFR3 in disease|FGFR1 mutant receptor activation|FGFR2 mutant receptor activation|Signaling by FGFR3 point mutants in cancer|Signaling by activated point mutants of FGFR1|FGFR3 mutant r…	Cellular Processes|Environmental Information Processing|Human Diseases	Cell motility|Signal transduction|Cancers: Overview|Cancers: Specific types	Regulation of actin cytoskeleton|MAPK signaling pathway|Ras signaling pathway|Rap1 signaling pathway|PI3K-Akt signaling pathway|Pathways in cancer|Melanoma|Breast cancer|Gastric cancer	NA
2515	ADAM2	0	Eukaryotes	0.564972	1	1	10	646	0.0222	3	1	Reproduction	Fertilization|Interaction With The Zona Pellucida	NA	NA	NA	NA
2768	GNA12	0	Eukaryotes	2.89855	43	36	37	19359	0.0946	6	23	Hemostasis|Signal Transduction	Platelet activation, signaling and aggregation|Thrombin signalling through proteinase activated receptors (PARs)|Signaling by GPCR|GPCR downstream signalling|G alpha (12/13) signalling events	Cellular Processes|Environmental Information Processing|Human Diseases|Organismal Systems	Cell motility|Signal transduction|Cancers: Overview|Circulatory system|Nervous system	Regulation of actin cytoskeleton|MAPK signaling pathway|cGMP-PKG signaling pathway|Sphingolipid signaling pathway|Phospholipase D signaling pathway|Pathways in cancer|Vascular smooth muscle contraction|Long-term depression	Thrombin signaling and protease-activated receptors|PKC-catalyzed phosphorylation of inhibitory phosphoprotein of myosin phosphatase|Rho-Selective Guanine Exchange Factor AKAP13 Mediates Stress Fiber Formation
2782	GNB1	3	Eukaryotes	6.25	43	32	99	68637	0.061	71	47	Hemostasis|Metabolism|Metabolism of proteins|Neuronal System|Signal Transduction|Transport of small molecules	Platelet homeostasis|Platelet activation, signaling and aggregation|Signal amplification|Prostacyclin signalling through prostacyclin receptor|Thrombin signalling through proteinase activated receptors (PARs)|ADP signalling through P2Y purinoceptor 12|ADP signalling through P2Y purinoceptor 1|Thromboxane signalling through TP receptor|Integration of energy metabolism|Glucagon signaling in metabol…	Environmental Information Processing|Human Diseases|Organismal Systems	Signal transduction|Cancers: Overview|Infectious diseases: Viral|Substance dependence|Endocrine system|Environmental adaptation|Immune system|Nervous system|Sensory system	Ras signaling pathway|PI3K-Akt signaling pathway|Apelin signaling pathway|Pathways in cancer|Kaposi's sarcoma-associated herpesvirus infection|Morphine addiction|Alcoholism|Relaxin signaling pathway|Circadian entrainment|Chemokine signaling pathway|Retrograde endocannabinoid signaling|Glutamatergic synapse|Cholinergic synapse|Serotonergic synapse|GABAergic synapse|Dopaminergic synapse|Olfactory t…	NA
2846	LPAR4	0	Metazoans	10.1449	3	NA	33	8013	0.0095	2	0	Signal Transduction	Signaling by GPCR|GPCR downstream signalling|GPCR ligand binding|Class A/1 (Rhodopsin-like receptors)|G alpha (q) signalling events|Nucleotide-like (purinergic) receptors|P2Y receptors	Environmental Information Processing|Human Diseases	Signaling molecules and interaction|Signal transduction|Cancers: Overview	Neuroactive ligand-receptor interaction|Rap1 signaling pathway|Phospholipase D signaling pathway|PI3K-Akt signaling pathway|Pathways in cancer	NA
2911	GRM1	0	Last Universal Common Ancestor	0	1	4	19	2250	0.1404	5	15	Neuronal System|Signal Transduction	Protein-protein interactions at synapses|Neurexins and neuroligins|Signaling by GPCR|GPCR downstream signalling|GPCR ligand binding|G alpha (q) signalling events|Class C/3 (Metabotropic glutamate/pheromone receptors)	Cellular Processes|Environmental Information Processing|Organismal Systems	Cellular community - eukaryotes|Signaling molecules and interaction|Signal transduction|Endocrine system|Nervous system|Sensory system	Gap junction|Neuroactive ligand-receptor interaction|Calcium signaling pathway|FoxO signaling pathway|Phospholipase D signaling pathway|Estrogen signaling pathway|Long-term potentiation|Retrograde endocannabinoid signaling|Glutamatergic synapse|Long-term depression|Taste transduction	Regulation of ck1/cdk5 by type 1 glutamate receptors
3080	CFHR2	1	Mammals	0.621118	1	2	2	1019	0	1	1	Immune System	Innate Immune System|Complement cascade|Regulation of Complement cascade	NA	NA	NA	NA
3146	HMGB1	23	Eukaryotes	62.8571	43	44	121	92314	0.0607	8	167	Immune System|Programmed Cell Death	Cytokine Signaling in Immune system|Innate Immune System|Toll-Like Receptors Cascades|DDX58/IFIH1-mediated induction of interferon-alpha/beta|Cytosolic sensors of pathogen-associated DNA |Signaling by Interleukins|Neutrophil degranulation|Advanced glycosylation endproduct receptor signaling|ZBP1(DAI) mediated induction of type I IFNs|Toll Like Receptor 4 (TLR4) Cascade|Toll Like Receptor 9 (TLR9)…	Cellular Processes|Genetic Information Processing	Cell growth and death|Transport and catabolism|Replication and repair	Necroptosis|Autophagy - animal|Base excision repair	Apoptotic DNA fragmentation and tissue homeostasis|The information-processing pathway at the IFN-beta enhancer
3837	KPNB1	0	Eukaryotes	98.8636	43	41	254	147465	0.07	15	27	Disease|Immune System|Metabolism|Programmed Cell Death	Infectious disease|HIV Infection|Influenza Infection|Host Interactions of HIV factors|Host Interactions with Influenza Factors|Influenza Life Cycle|Transport of Ribonucleoproteins into the Host Nucleus|NS1 Mediated Effects on Host Pathways|Interactions of Rev with host cellular proteins|Nuclear import of Rev protein|Cytokine Signaling in Immune system|Innate Immune System|Neutrophil degranulation…	Genetic Information Processing	Translation	RNA transport	Role of Ran in mitotic spindle regulation|Mechanism of Protein Import into the Nucleus
4209	MEF2D	0	Eukaryotes	6.77966	43	44	39	6115	0.1714	2	131	Developmental Biology|Organelle biogenesis and maintenance	Myogenesis|CDO in myogenesis|Mitochondrial biogenesis|Transcriptional activation of mitochondrial biogenesis	Environmental Information Processing	Signal transduction	cGMP-PKG signaling pathway|Apelin signaling pathway	Role of MEF2D in T-cell Apoptosis
4216	MAP3K4	0	Eukaryotes	0	43	43	54	6190	0.051	2	15	NA	NA	Environmental Information Processing|Organismal Systems	Signal transduction|Endocrine system	MAPK signaling pathway|GnRH signaling pathway	MAPKinase Signaling Pathway
4605	MYBL2	0	Eukaryotes	45.7143	19	43	51	5234	0.0965	7	45	Cell Cycle|Gene expression (Transcription)	Cell Cycle, Mitotic|Mitotic G2-G2/M phases|Mitotic G1-G1/S phases|G0 and Early G1|G2/M Transition|Transcription of E2F targets under negative control by p107 (RBL1) and p130 (RBL2) in complex with HDAC1|Polo-like kinase mediated events|RNA Polymerase II Transcription|Generic Transcription Pathway|Transcriptional regulation by the AP-2 (TFAP2) family of transcription factors|TFAP2A acts as a trans…	Cellular Processes|Human Diseases	Cell growth and death|Infectious diseases: Viral	Cellular senescence|HTLV-I infection	NA
4715	NDUFB9	1	Eukaryotes	15.4286	43	37	63	15176	0.1444	4	0	Metabolism	The citric acid (TCA) cycle and respiratory electron transport|Respiratory electron transport, ATP synthesis by chemiosmotic coupling, and heat production by uncoupling proteins.|Respiratory electron transport|Complex I biogenesis	Human Diseases|Metabolism|Organismal Systems	Endocrine and metabolic diseases|Neurodegenerative diseases|Energy metabolism|Global and overview maps|Nervous system	Non-alcoholic fatty liver disease (NAFLD)|Alzheimer's disease|Parkinson's disease|Huntington's disease|Oxidative phosphorylation|Metabolic pathways|Retrograde endocannabinoid signaling	NA
4734	NEDD4	0	Last Universal Common Ancestor	1.12994	40	38	300	300448	0.0231	14	4	Immune System|Signal Transduction	Cytokine Signaling in Immune system|Adaptive Immune System|Interferon Signaling|Class I MHC mediated antigen processing & presentation|Antiviral mechanism by IFN-stimulated genes|Antigen processing: Ubiquitination & Proteasome degradation|ISG15 antiviral mechanism|Intracellular signaling by second messengers|Signaling by Receptor Tyrosine Kinases|Signaling by ERBB4|PIP3 activates AKT signaling|Do…	Cellular Processes|Genetic Information Processing|Human Diseases	Cellular community - eukaryotes|Transport and catabolism|Folding, sorting and degradation|Infectious diseases: Viral	Tight junction|Endocytosis|Ubiquitin mediated proteolysis|Epstein-Barr virus infection	NA
5101	PCDH9	0	Last Universal Common Ancestor	0	15	NA	13	2243	0.0385	0	14	NA	NA	NA	NA	NA	NA
5218	CDK14	0	Last Universal Common Ancestor	2.98507	43	34	25	2070	0.1233	0	35	NA	NA	Human Diseases	Cancers: Overview	Transcriptional misregulation in cancer	NA
5275	SERPINB13	0	Last Universal Common Ancestor	2.89855	3	7	31	4004	0.0043	3	0	Gene expression (Transcription)	RNA Polymerase II Transcription|Generic Transcription Pathway|Transcriptional regulation by RUNX1|RUNX1 regulates transcription of genes involved in differentiation of keratinocytes	Human Diseases	Infectious diseases: Parasitic	Amoebiasis	NA
5286	PIK3C2A	0	Last Universal Common Ancestor	1.12994	43	44	59	7686	0.173	5	34	Metabolism|Vesicle-mediated transport	Metabolism of lipids|Phospholipid metabolism|PI Metabolism|Synthesis of PIPs at the plasma membrane|Synthesis of PIPs at the Golgi membrane|Synthesis of PIPs at the early endosome membrane|Synthesis of PIPs at the late endosome membrane|Membrane Trafficking|trans-Golgi Network Vesicle Budding|Clathrin-mediated endocytosis|Clathrin derived vesicle budding|Golgi Associated Vesicle Biogenesis	Environmental Information Processing|Metabolism	Signal transduction|Carbohydrate metabolism|Global and overview maps	Phosphatidylinositol signaling system|Inositol phosphate metabolism|Metabolic pathways	NA
5289	PIK3C3	0	Last Universal Common Ancestor	16.185	43	44	39	5958	0.1215	9	15	Cellular responses to external stimuli|Immune System|Metabolism|Signal Transduction	Macroautophagy|Innate Immune System|Toll-Like Receptors Cascades|Toll Like Receptor 9 (TLR9) Cascade|Metabolism of lipids|Phospholipid metabolism|PI Metabolism|Synthesis of PIPs at the Golgi membrane|Synthesis of PIPs at the early endosome membrane|Synthesis of PIPs at the late endosome membrane|Signaling by Rho GTPases|Signaling by Receptor Tyrosine Kinases|RHO GTPase Effectors|Signaling by Type…	Cellular Processes|Environmental Information Processing|Human Diseases|Metabolism	Transport and catabolism|Signal transduction|Infectious diseases: Bacterial|Infectious diseases: Viral|Carbohydrate metabolism|Global and overview maps	Autophagy - other|Autophagy - animal|Phagosome|Phosphatidylinositol signaling system|Apelin signaling pathway|Tuberculosis|Kaposi's sarcoma-associated herpesvirus infection|Inositol phosphate metabolism|Metabolic pathways	NA
5294	PIK3CG	0	Last Universal Common Ancestor	2.7027	18	NA	33	22550	0.053	1	38	Hemostasis|Metabolism|Signal Transduction	Platelet activation, signaling and aggregation|GPVI-mediated activation cascade|Metabolism of lipids|Phospholipid metabolism|PI Metabolism|Synthesis of PIPs at the plasma membrane|Signaling by GPCR|GPCR downstream signalling|G-protein beta:gamma signalling|G beta:gamma signalling through PI3Kgamma	Environmental Information Processing|Human Diseases|Metabolism|Organismal Systems	Signal transduction|Infectious diseases: Parasitic|Infectious diseases: Viral|Carbohydrate metabolism|Circulatory system|Endocrine system|Immune system|Nervous system	cGMP-PKG signaling pathway|Phospholipase D signaling pathway|PI3K-Akt signaling pathway|Apelin signaling pathway|Toxoplasmosis|Kaposi's sarcoma-associated herpesvirus infection|Inositol phosphate metabolism|Adrenergic signaling in cardiomyocytes|Oxytocin signaling pathway|Platelet activation|Cholinergic synapse	B Cell Survival Pathway|Corticosteroids and cardioprotection|Insulin Signaling Pathway|NFAT and Hypertrophy of the heart (Transcription in the broken heart)|PDGF Signaling Pathway|AKT Signaling Pathway|Phospholipids as signalling intermediaries|Role of Erk5 in Neuronal Survival|Growth Hormone Signaling Pathway|IL-7 Signal Transduction|The IGF-1 Receptor and Longevity|Mechanism of Gene Regulation …
5582	PRKCG	0	Last Universal Common Ancestor	0	4	1	66	20935	0.0597	2	1	Hemostasis|Neuronal System|Signal Transduction	Platelet activation, signaling and aggregation|Response to elevated platelet cytosolic Ca2+|Disinhibition of SNARE formation|Transmission across Chemical Synapses|Neurotransmitter receptors and postsynaptic signal transmission|Glutamate binding, activation of AMPA receptors and synaptic plasticity|Trafficking of AMPA receptors|Trafficking of GluR2-containing AMPA receptors|Signaling by WNT|Signal…	Cellular Processes|Environmental Information Processing|Human Diseases|Organismal Systems	Cellular community - eukaryotes|Signal transduction|Cancers: Overview|Cancers: Specific types|Drug resistance: Antineoplastic|Infectious diseases: Parasitic|Infectious diseases: Viral|Substance dependence|Circulatory system|Digestive system|Endocrine system|Environmental adaptation|Excretory system|Immune system|Nervous system|Sensory system	Focal adhesion|Gap junction|MAPK signaling pathway|ErbB signaling pathway|Ras signaling pathway|Rap1 signaling pathway|Calcium signaling pathway|HIF-1 signaling pathway|Phosphatidylinositol signaling system|Sphingolipid signaling pathway|mTOR signaling pathway|Wnt signaling pathway|VEGF signaling pathway|Pathways in cancer|Proteoglycans in cancer|MicroRNAs in cancer|Choline metabolism in cancer|G…	Keratinocyte Differentiation
5606	MAP2K3	0	Opisthokonts	4.54545	43	41	36	6640	0.0905	0	49	Cellular responses to external stimuli|Disease|Immune System	Cellular responses to stress|Cellular Senescence|Oxidative Stress Induced Senescence|Infectious disease|Uptake and actions of bacterial toxins|Uptake and function of anthrax toxins|Cytokine Signaling in Immune system|Innate Immune System|Toll-Like Receptors Cascades|Signaling by Interleukins|Toll Like Receptor 4 (TLR4) Cascade|Toll Like Receptor 9 (TLR9) Cascade|Toll Like Receptor 10 (TLR10) Casc…	Cellular Processes|Environmental Information Processing|Human Diseases|Organismal Systems	Cell growth and death|Signal transduction|Infectious diseases: Parasitic|Infectious diseases: Viral|Neurodegenerative diseases|Endocrine system|Immune system|Sensory system	Cellular senescence|MAPK signaling pathway|Rap1 signaling pathway|TNF signaling pathway|Toxoplasmosis|Influenza A|Epstein-Barr virus infection|Amyotrophic lateral sclerosis (ALS)|GnRH signaling pathway|Toll-like receptor signaling pathway|Fc epsilon RI signaling pathway|Inflammatory mediator regulation of TRP channels	Toll-Like Receptor Pathway|MAPKinase Signaling Pathway|Human Cytomegalovirus and Map Kinase Pathways|fMLP induced chemokine gene expression in HMC-1 cells|Keratinocyte Differentiation|Links between Pyk2 and Map Kinases|GATA3 participate in activating the Th2 cytokine genes expression|Signal transduction through IL1R|NFkB activation by Nontypeable Hemophilus influenzae|TNF/Stress Related Signaling
5764	PTN	0	Metazoans	0.568182	40	3	96	48979	0.0175	0	1	NA	NA	NA	NA	NA	NA
5770	PTPN1	0	Last Universal Common Ancestor	3.97727	43	30	165	109032	0.0356	4	45	Hemostasis|Immune System|Signal Transduction	Platelet activation, signaling and aggregation|Platelet Aggregation (Plug Formation)|Integrin alphaIIb beta3 signaling|Cytokine Signaling in Immune system|Interferon Signaling|Growth hormone receptor signaling|Interferon gamma signaling|Interferon alpha/beta signaling|Regulation of IFNG signaling|Regulation of IFNA signaling|Integrin signaling|Signaling by Non-Receptor Tyrosine Kinases|Signaling …	Cellular Processes|Human Diseases|Organismal Systems	Cellular community - eukaryotes|Endocrine and metabolic diseases|Endocrine system	Adherens junction|Insulin resistance|Insulin signaling pathway	NA
6014	RIT2	0	Last Universal Common Ancestor	0	1	4	16	4248	0.15	0	0	Signal Transduction	Signaling by Receptor Tyrosine Kinases|Signalling by NGF|NGF signalling via TRKA from the plasma membrane|Signalling to ERKs|Signalling to p38 via RIT and RIN	NA	NA	NA	NA
6256	RXRA	0	Eukaryotes	0.574713	42	44	130	36905	0.0987	34	28	Circadian Clock|Developmental Biology|Gene expression (Transcription)|Metabolism|Organelle biogenesis and maintenance|Signal Transduction	RORA activates gene expression|BMAL1:CLOCK,NPAS2 activates circadian gene expression|Transcriptional regulation of white adipocyte differentiation|Activation of HOX genes during differentiation|Activation of anterior HOX genes in hindbrain development during early embryogenesis|RNA Polymerase II Transcription|Generic Transcription Pathway|YAP1- and WWTR1 (TAZ)-stimulated gene expression|Nuclear R…	Environmental Information Processing|Human Diseases|Organismal Systems	Signal transduction|Cancers: Overview|Cancers: Specific types|Endocrine and metabolic diseases|Infectious diseases: Viral|Digestive system|Endocrine system|Immune system	PI3K-Akt signaling pathway|Pathways in cancer|Transcriptional misregulation in cancer|Thyroid cancer|Small cell lung cancer|Non-small cell lung cancer|Gastric cancer|Non-alcoholic fatty liver disease (NAFLD)|Hepatitis C|Bile secretion|PPAR signaling pathway|Thyroid hormone signaling pathway|Adipocytokine signaling pathway|Th17 cell differentiation	Mechanism of Gene Regulation by Peroxisome Proliferators via PPARa(alpha)|Nuclear receptors coordinate the activities of chromatin remodeling complexes and coactivators to facilitate initiation of transcription in carcinoma cells|Control of Gene Expression by Vitamin D Receptor|Map Kinase Inactivation of SMRT Corepressor|Role of PPAR-gamma Coactivators in Obesity and Thermogenesis|Degradation of …
6511	SLC1A6	0	Last Universal Common Ancestor	1.13636	5	7	2	3	0	0	1	Neuronal System|Transport of small molecules	Transmission across Chemical Synapses|Neurotransmitter release cycle|Glutamate Neurotransmitter Release Cycle|SLC-mediated transmembrane transport|Transport of inorganic cations/anions and amino acids/oligopeptides	Organismal Systems	Nervous system	Glutamatergic synapse	NA
6538	SLC6A11	0	Last Universal Common Ancestor	1.44928	4	4	0	0	NA	0	0	Metabolism|Neuronal System|Transport of small molecules	Metabolism of amino acids and derivatives|Metabolism of polyamines|Creatine metabolism|Transmission across Chemical Synapses|Neurotransmitter release cycle|GABA synthesis, release, reuptake and degradation|Reuptake of GABA|SLC-mediated transmembrane transport|Transport of bile salts and organic acids, metal ions and amine compounds|Na+/Cl- dependent neurotransmitter transporters	Organismal Systems	Nervous system	GABAergic synapse	NA
6594	SMARCA1	1	Last Universal Common Ancestor	0	41	17	46	6588	0.1092	4	5	NA	NA	NA	NA	NA	NA
6651	SON	0	Metazoans	67.9487	43	44	77	13005	0.1945	0	117	NA	NA	NA	NA	NA	NA
6741	SSB	3	Eukaryotes	13.4503	43	44	108	41286	0.1206	3	7	Gene expression (Transcription)	RNA Polymerase III Transcription|RNA Polymerase III Transcription Termination|RNA Polymerase III Abortive And Retractive Initiation	Human Diseases	Immune diseases	Systemic lupus erythematosus	RNA polymerase III transcription
6786	STIM1	0	Eukaryotes	0	43	41	36	17708	0.0413	1	31	Hemostasis|Immune System|Muscle contraction	Platelet homeostasis|Platelet calcium homeostasis|Elevation of cytosolic Ca2+ levels|Adaptive Immune System|Signaling by the B Cell Receptor (BCR)|Antigen activates B Cell Receptor (BCR) leading to generation of second messengers|Cardiac conduction|Ion homeostasis	Environmental Information Processing|Organismal Systems	Signal transduction|Immune system	Calcium signaling pathway|Platelet activation	NA
6882	TAF11	0	Eukaryotes	8.77193	43	NA	40	5811	0.2436	36	14	Disease|Gene expression (Transcription)	Infectious disease|HIV Infection|HIV Life Cycle|Late Phase of HIV Life Cycle|Transcription of the HIV genome|HIV Transcription Initiation|RNA Polymerase II HIV Promoter Escape|RNA Polymerase II Transcription|Generic Transcription Pathway|RNA Polymerase II Pre-transcription Events|RNA polymerase II transcribes snRNA genes|RNA Polymerase II Transcription Pre-Initiation And Promoter Opening|RNA Poly…	Genetic Information Processing	Transcription	Basal transcription factors	NA
7011	TEP1	0	Last Universal Common Ancestor	0	42	NA	11	371	0.1273	0	36	NA	NA	NA	NA	NA	Telomeres, Telomerase, Cellular Aging, and Immortality
7050	TGIF1	1	Eukaryotes	4	43	NA	31	5434	0.1419	1	64	Gene expression (Transcription)|Signal Transduction	RNA Polymerase II Transcription|Generic Transcription Pathway|Transcriptional activity of SMAD2/SMAD3:SMAD4 heterotrimer|Downregulation of SMAD2/3:SMAD4 transcriptional activity|SMAD2/SMAD3:SMAD4 heterotrimer regulates transcription|Signaling by TGF-beta family members|Signaling by TGF-beta Receptor Complex|Transcriptional activity of SMAD2/SMAD3:SMAD4 heterotrimer|Downregulation of SMAD2/3:SMAD4…	Environmental Information Processing	Signal transduction	TGF-beta signaling pathway	NA
7097	TLR2	0	Last Universal Common Ancestor	0	41	NA	45	11073	0.0495	14	10	Disease|Immune System	Diseases of Immune System|Diseases associated with the TLR signaling cascade|MyD88 deficiency (TLR2/4)|IRAK4 deficiency (TLR2/4)|Adaptive Immune System|Innate Immune System|Toll-Like Receptors Cascades|Neutrophil degranulation|Antimicrobial peptides|Class I MHC mediated antigen processing & presentation|Antigen processing-Cross presentation|Defensins|Toll Like Receptor 4 (TLR4) Cascade|Toll Like …	Cellular Processes|Environmental Information Processing|Human Diseases|Organismal Systems	Transport and catabolism|Signal transduction|Cancers: Overview|Immune diseases|Infectious diseases: Bacterial|Infectious diseases: Parasitic|Infectious diseases: Viral|Immune system	Phagosome|PI3K-Akt signaling pathway|Proteoglycans in cancer|Inflammatory bowel disease (IBD)|Rheumatoid arthritis|Legionellosis|Tuberculosis|Leishmaniasis|Chagas disease (American trypanosomiasis)|Malaria|Toxoplasmosis|Amoebiasis|Hepatitis B|Measles|Herpes simplex infection|Toll-like receptor signaling pathway	NA
7226	TRPM2	0	Eukaryotes	0.564972	36	22	2	0	1	1	1	Immune System|Transport of small molecules	Innate Immune System|Neutrophil degranulation|Ion channel transport|Stimuli-sensing channels|TRP channels	Organismal Systems	Endocrine system|Immune system	Oxytocin signaling pathway|NOD-like receptor signaling pathway	NA
7314	UBB	17	Last Universal Common Ancestor	63.253	43	44	247	325410	0.0404	180	42	Cell Cycle|Cellular responses to external stimuli|Developmental Biology|Disease|DNA Repair|DNA Replication|Gene expression (Transcription)|Immune System|Metabolism|Metabolism of proteins|Metabolism of RNA|Mitophagy|Programmed Cell Death|Signal Transduction|Transport of small molecules|Vesicle-mediated transport	Cell Cycle, Mitotic|Cell Cycle Checkpoints|Mitotic G2-G2/M phases|Regulation of mitotic cell cycle|Mitotic G1-G1/S phases|M/G1 Transition|M Phase|S Phase|Regulation of DNA replication|G2/M Checkpoints|G1/S DNA Damage Checkpoints|APC/C-mediated degradation of cell cycle proteins|Mitotic Metaphase and Anaphase|DNA Replication Pre-Initiation|G1/S Transition|G1 Phase|Synthesis of DNA|G2/M Transition|…	Cellular Processes|Human Diseases	Transport and catabolism|Infectious diseases: Viral|Neurodegenerative diseases	Mitophagy - animal|Endocytosis|Kaposi's sarcoma-associated herpesvirus infection|Parkinson's disease	NA
7319	UBE2A	1	Eukaryotes	1.71429	43	NA	80	19368	0.0725	5	26	Immune System|Metabolism of proteins	Adaptive Immune System|Class I MHC mediated antigen processing & presentation|Antigen processing: Ubiquitination & Proteasome degradation|Post-translational protein modification|Protein ubiquitination|Synthesis of active ubiquitin: roles of E1 and E2 enzymes|E3 ubiquitin ligases ubiquitinate target proteins	Genetic Information Processing	Folding, sorting and degradation	Ubiquitin mediated proteolysis	NA
7770	ZNF227	0	Last Universal Common Ancestor	0.564972	43	35	9	323	0	1	2	Gene expression (Transcription)	RNA Polymerase II Transcription|Generic Transcription Pathway	NA	NA	NA	NA
7881	KCNAB1	0	Last Universal Common Ancestor	2.25989	34	28	14	9428	0.1868	1	8	Neuronal System	Potassium Channels|Voltage gated Potassium channels	NA	NA	NA	NA
8089	YEATS4	0	Eukaryotes	31.9767	43	NA	135	34150	0.0919	14	9	Chromatin organization|Gene expression (Transcription)	Chromatin modifying enzymes|HATs acetylate histones|RNA Polymerase II Transcription|Generic Transcription Pathway|Transcriptional regulation by the AP-2 (TFAP2) family of transcription factors|Activation of the TFAP2 (AP-2) family of transcription factors	NA	NA	NA	NA
8701	DNAH11	0	Eukaryotes	0	5	3	1	0	0	0	1	NA	NA	Human Diseases	Neurodegenerative diseases	Huntington's disease	NA
8737	RIPK1	0	Last Universal Common Ancestor	0.675676	43	44	105	34398	0.1456	6	0	Immune System|Metabolism of proteins|Programmed Cell Death|Signal Transduction|Transport of small molecules	Innate Immune System|Toll-Like Receptors Cascades|DDX58/IFIH1-mediated induction of interferon-alpha/beta|Cytosolic sensors of pathogen-associated DNA |ZBP1(DAI) mediated induction of type I IFNs|Toll Like Receptor 4 (TLR4) Cascade|Toll Like Receptor 3 (TLR3) Cascade|NF-kB activation through FADD/RIP-1 pathway mediated by caspase-8 and -10|MyD88-independent TLR4 cascade |TICAM1, RIP1-mediated IKK…	Cellular Processes|Environmental Information Processing|Human Diseases|Organismal Systems	Cell growth and death|Signal transduction|Infectious diseases: Viral|Immune system	Apoptosis|Necroptosis|NF-kappa B signaling pathway|TNF signaling pathway|Hepatitis C|Epstein-Barr virus infection|Toll-like receptor signaling pathway|NOD-like receptor signaling pathway|RIG-I-like receptor signaling pathway|Cytosolic DNA-sensing pathway	HIV-I Nef: negative effector of Fas and TNF|Ceramide Signaling Pathway|NF-kB Signaling Pathway|Keratinocyte Differentiation|Acetylation and Deacetylation of RelA in The Nucleus|MAPKinase Signaling Pathway|p38 MAPK Signaling Pathway |SODD/TNFR1 Signaling Pathway|TNFR1 Signaling Pathway|Induction of apoptosis through DR3 and DR4/5 Death Receptors |TNF/Stress Related Signaling|TNFR2 Signaling Pathway
8788	DLK1	0	Last Universal Common Ancestor	0.564972	13	2	70	23640	0.0066	2	12	Signal Transduction	Signaling by NOTCH|Signaling by NOTCH1|Activated NOTCH1 Transmits Signal to the Nucleus	NA	NA	NA	NA
8894	EIF2S2	5	Last Universal Common Ancestor	82.7381	43	44	85	19643	0.1084	10	24	Metabolism of proteins|Transport of small molecules	Translation|Eukaryotic Translation Initiation|L13a-mediated translational silencing of Ceruloplasmin expression|Cap-dependent Translation Initiation|Activation of the mRNA upon binding of the cap-binding complex and eIFs, and subsequent binding to 43S|Formation of the ternary complex, and subsequently, the 43S complex|Ribosomal scanning and start codon recognition|GTP hydrolysis and joining of th…	Genetic Information Processing	Translation	RNA transport	Double Stranded RNA Induced Gene Expression|VEGF, Hypoxia, and Angiogenesis|Skeletal muscle hypertrophy is regulated via AKT/mTOR pathway|Regulation of eIF2|Eukaryotic protein translation
9100	USP10	3	Eukaryotes	8.69565	43	44	62	7421	0.11	4	11	DNA Repair|Metabolism of proteins	DNA Damage Bypass|Translesion synthesis by Y family DNA polymerases bypasses lesions on DNA template|Termination of translesion DNA synthesis|Post-translational protein modification|Deubiquitination|Ub-specific processing proteases	NA	NA	NA	NA
9125	CNOT9	0	Eukaryotes	12.2807	43	40	45	9280	0.198	2	6	Developmental Biology|Gene expression (Transcription)|Metabolism of RNA	Activation of HOX genes during differentiation|Activation of anterior HOX genes in hindbrain development during early embryogenesis|RNA Polymerase II Transcription|Generic Transcription Pathway|Transcriptional Regulation by TP53|TP53 Regulates Transcription of Cell Cycle Genes|TP53 regulates transcription of additional cell cycle genes whose exact role in the p53 pathway remain uncertain|Deadenyl…	Genetic Information Processing	Folding, sorting and degradation	RNA degradation	NA
9173	IL1RL1	0	Vertebrates	0	29	NA	9	1226	0.3333	1	1	Immune System|Signal Transduction	Cytokine Signaling in Immune system|Signaling by Interleukins|Interleukin-1 family signaling|Interleukin-33 signaling|Intracellular signaling by second messengers|PIP3 activates AKT signaling|Negative regulation of the PI3K/AKT network|PI5P, PP2A and IER3 Regulate PI3K/AKT Signaling	NA	NA	NA	NA
9320	TRIP12	0	Last Universal Common Ancestor	13.2353	43	40	57	26211	0.0683	0	9	Immune System	Adaptive Immune System|Class I MHC mediated antigen processing & presentation|Antigen processing: Ubiquitination & Proteasome degradation	Genetic Information Processing	Folding, sorting and degradation	Ubiquitin mediated proteolysis	NA
9538	EI24	3	Eukaryotes	0	43	41	6	142	0.0667	0	28	NA	NA	Cellular Processes	Cell growth and death	p53 signaling pathway	NA
9816	URB2	0	Metazoans	17.6136	40	NA	24	1578	0.1377	0	5	NA	NA	NA	NA	NA	NA
9832	JAKMIP2	0	Metazoans	0	12	36	13	305	0.0256	0	28	NA	NA	NA	NA	NA	NA
9860	LRIG2	0	Last Universal Common Ancestor	0	39	42	4	14	0.8333	0	110	NA	NA	NA	NA	NA	NA
9914	ATP2C2	0	Last Universal Common Ancestor	1.70455	22	35	1	0	0	0	0	Transport of small molecules	Ion channel transport|Ion transport by P-type ATPases	NA	NA	NA	NA
10017	BCL2L10	0	Metazoans	0	10	10	11	202	0.4182	1	1	NA	NA	NA	NA	NA	NA
10256	CNKSR1	0	Mammals	0	36	NA	28	3219	0.0423	22	0	Disease|Signal Transduction	Diseases of signal transduction|Oncogenic MAPK signaling|Signaling by moderate kinase activity BRAF mutants|Signaling by high-kinase activity BRAF mutants|Signaling by RAS mutants|Signaling by BRAF and RAF fusions|Paradoxical activation of RAF signaling by kinase inactive BRAF|MAPK family signaling cascades|MAPK1/MAPK3 signaling|RAF/MAP kinase cascade|MAP2K and MAPK activation	NA	NA	NA	NA
10402	ST3GAL6	0	Eukaryotes	0.564972	42	44	6	1243	0	0	7	Metabolism|Metabolism of proteins|Signal Transduction	Metabolism of carbohydrates|Glycosaminoglycan metabolism|Keratan sulfate/keratin metabolism|Keratan sulfate biosynthesis|Post-translational protein modification|Asparagine N-linked glycosylation|Biosynthesis of the N-glycan precursor (dolichol lipid-linked oligosaccharide, LLO) and transfer to a nascent protein|Synthesis of substrates in N-glycan biosythesis|Sialic acid metabolism|Signaling by NO…	Metabolism	Global and overview maps|Glycan biosynthesis and metabolism	Metabolic pathways|Glycosphingolipid biosynthesis - lacto and neolacto series	NA
10436	EMG1	0	Last Universal Common Ancestor	35.7143	43	28	27	6915	0.0912	4	0	Metabolism of RNA	rRNA processing|rRNA processing in the nucleus and cytosol|rRNA modification in the nucleus and cytosol|Major pathway of rRNA processing in the nucleolus and cytosol	Genetic Information Processing	Translation	Ribosome biogenesis in eukaryotes	NA
10620	ARID3B	1	Eukaryotes	0	40	32	25	3632	0.1033	0	33	NA	NA	NA	NA	NA	NA
10627	MYL12A	6	Last Universal Common Ancestor	6.38298	43	8	64	5346	0.1146	8	28	Developmental Biology|Muscle contraction|Signal Transduction	Axon guidance|EPH-Ephrin signaling|Semaphorin interactions|EPHA-mediated growth cone collapse|Ephrin signaling|Sema4D in semaphorin signaling|Sema4D induced cell migration and growth-cone collapse|Smooth Muscle Contraction|Signaling by Rho GTPases|RHO GTPase Effectors|RHO GTPases activate PKNs|RHO GTPases activate CIT|RHO GTPases Activate ROCKs|RHO GTPases activate PAKs	Cellular Processes|Organismal Systems	Cell motility|Cellular community - eukaryotes|Immune system	Regulation of actin cytoskeleton|Focal adhesion|Tight junction|Platelet activation|Leukocyte transendothelial migration	NA
10672	GNA13	0	Eukaryotes	0.564972	43	43	67	53448	0.0448	10	33	Hemostasis|Signal Transduction	Platelet activation, signaling and aggregation|Signal amplification|Thrombin signalling through proteinase activated receptors (PARs)|Thromboxane signalling through TP receptor|Signaling by Rho GTPases|Signaling by GPCR|Signaling by Receptor Tyrosine Kinases|Signalling by NGF|Rho GTPase cycle|GPCR downstream signalling|p75 NTR receptor-mediated signalling|G alpha (12/13) signalling events|Cell de…	Cellular Processes|Environmental Information Processing|Human Diseases|Organismal Systems	Cell motility|Signal transduction|Cancers: Overview|Circulatory system|Immune system|Nervous system	Regulation of actin cytoskeleton|cGMP-PKG signaling pathway|Sphingolipid signaling pathway|Phospholipase D signaling pathway|Apelin signaling pathway|Pathways in cancer|Vascular smooth muscle contraction|Platelet activation|Long-term depression	PKC-catalyzed phosphorylation of inhibitory phosphoprotein of myosin phosphatase|Thrombin signaling and protease-activated receptors
10810	WASF3	0	Eukaryotes	0	40	42	27	1820	0.1396	4	42	Immune System|Signal Transduction	Innate Immune System|Fcgamma receptor (FCGR) dependent phagocytosis|Regulation of actin dynamics for phagocytic cup formation|Signaling by Rho GTPases|Signaling by Receptor Tyrosine Kinases|Signaling by VEGF|RHO GTPase Effectors|VEGFA-VEGFR2 Pathway|RHO GTPases Activate WASPs and WAVEs	Cellular Processes|Human Diseases|Organismal Systems	Cellular community - eukaryotes|Cancers: Overview|Immune system	Adherens junction|Choline metabolism in cancer|Fc gamma R-mediated phagocytosis	Y branching of actin filaments
10849	CD3EAP	0	Metazoans	24	41	44	27	1215	0.2279	5	32	Gene expression (Transcription)	Epigenetic regulation of gene expression|RNA Polymerase I Transcription|Positive epigenetic regulation of rRNA expression|Negative epigenetic regulation of rRNA expression|RNA Polymerase I Chain Elongation|RNA Polymerase I Promoter Clearance|RNA Polymerase I Transcription Termination|NoRC negatively regulates rRNA expression|B-WICH complex positively regulates rRNA expression|RNA Polymerase I Tra…	NA	NA	NA	NA
11214	AKAP13	0	Metazoans	0	43	43	31	4392	0.1333	0	19	Signal Transduction	Signaling by Rho GTPases|Signaling by GPCR|Signaling by Receptor Tyrosine Kinases|Signalling by NGF|Rho GTPase cycle|GPCR downstream signalling|p75 NTR receptor-mediated signalling|G alpha (12/13) signalling events|Cell death signalling via NRAGE, NRIF and NADE|NRAGE signals death through JNK	NA	NA	NA	Rho-Selective Guanine Exchange Factor AKAP13 Mediates Stress Fiber Formation
22865	SLITRK3	0	Metazoans	3.40909	14	4	2	104	0	1	9	Neuronal System	Protein-protein interactions at synapses|Receptor-type tyrosine-protein phosphatases	NA	NA	NA	NA
23024	PDZRN3	0	Mammals	0	40	43	13	891	0.0385	0	1	NA	NA	NA	NA	NA	NA
23038	WDTC1	0	Eukaryotes	0.675676	43	41	31	4630	0.1398	4	53	Metabolism of proteins	Post-translational protein modification|Neddylation	NA	NA	NA	NA
23075	SWAP70	0	Metazoans	0	43	6	31	3172	0.1419	0	14	NA	NA	NA	NA	NA	NA
23136	EPB41L3	0	Metazoans	3.9548	42	19	106	31864	0.0882	2	20	Neuronal System	Protein-protein interactions at synapses|Neurexins and neuroligins	NA	NA	NA	NA
23179	RGL1	0	Opisthokonts	3.18471	41	41	4	179	0.5	0	3	Metabolism	Metabolism of lipids|Regulation of lipid metabolism by Peroxisome proliferator-activated receptor alpha (PPARalpha)|PPARA activates gene expression	Environmental Information Processing	Signal transduction	Ras signaling pathway	NA
23220	DTX4	0	Eukaryotes	1.44928	42	31	4	6	0.8333	8	22	Immune System|Signal Transduction	Innate Immune System|Cytosolic sensors of pathogen-associated DNA |ZBP1(DAI) mediated induction of type I IFNs|STING mediated induction of host immune responses|Regulation of innate immune responses to cytosolic DNA|IRF3 mediated activation of type 1 IFN|IRF3-mediated induction of type I IFN|Signaling by NOTCH|Signaling by NOTCH1|Activated NOTCH1 Transmits Signal to the Nucleus	Environmental Information Processing	Signal transduction	Notch signaling pathway	NA
23309	SIN3B	0	Eukaryotes	10.2857	43	31	66	7173	0.1562	19	17	Gene expression (Transcription)|Metabolism	Epigenetic regulation of gene expression|RNA Polymerase II Transcription|Generic Transcription Pathway|Negative epigenetic regulation of rRNA expression|NoRC negatively regulates rRNA expression|Transcriptional regulation by RUNX1|RUNX1 regulates genes involved in megakaryocyte differentiation and platelet function|Metabolism of lipids|Regulation of lipid metabolism by Peroxisome proliferator-act…	NA	NA	NA	METS affect on Macrophage Differentiation
23385	NCSTN	0	Eukaryotes	5.7971	43	38	140	64189	0.0613	15	9	Developmental Biology|Disease|Extracellular matrix organization|Immune System|Signal Transduction	Axon guidance|EPH-Ephrin signaling|EPH-ephrin mediated repulsion of cells|Diseases of signal transduction|Signaling by NOTCH1 in Cancer|Signaling by NOTCH1 PEST Domain Mutants in Cancer|Signaling by NOTCH1 HD+PEST Domain Mutants in Cancer|Constitutive Signaling by NOTCH1 PEST Domain Mutants|Constitutive Signaling by NOTCH1 HD+PEST Domain Mutants|Degradation of the extracellular matrix|Innate Immu…	Environmental Information Processing|Human Diseases	Signal transduction|Neurodegenerative diseases	Notch signaling pathway|Alzheimer's disease	NA
26057	ANKRD17	0	Last Universal Common Ancestor	15.6069	43	39	39	5570	0.0229	0	16	NA	NA	NA	NA	NA	NA
27127	SMC1B	0	Last Universal Common Ancestor	0	1	1	6	20	0.7333	5	0	Cell Cycle|Reproduction	Meiosis|Meiotic synapsis|Meiosis|Meiotic synapsis	Cellular Processes	Cell growth and death	Cell cycle|Oocyte meiosis	NA
27231	NMRK2	0	Last Universal Common Ancestor	1.44928	7	1	6	876	0.0667	2	2	Metabolism	Metabolism of vitamins and cofactors|Metabolism of water-soluble vitamins and cofactors|Nicotinate metabolism	Metabolism	Global and overview maps|Metabolism of cofactors and vitamins	Metabolic pathways|Nicotinate and nicotinamide metabolism	NA
27255	CNTN6	0	Metazoans	1.21212	5	8	0	0	NA	1	0	Developmental Biology	Axon guidance|L1CAM interactions|CHL1 interactions	NA	NA	NA	NA
28513	CDH19	0	Last Universal Common Ancestor	0.564972	27	NA	24	1236	0.0688	0	1	NA	NA	NA	NA	NA	NA
29074	MRPL18	0	Metazoans	32.7485	43	41	48	3094	0.3431	11	21	Metabolism of proteins	Translation|Mitochondrial translation|Mitochondrial translation initiation|Mitochondrial translation elongation|Mitochondrial translation termination	Genetic Information Processing	Translation	Ribosome	NA
29109	FHOD1	0	Eukaryotes	0	42	16	37	9153	0.0751	0	10	NA	NA	NA	NA	NA	NA
29761	USP25	0	Eukaryotes	0	43	44	46	11722	0.0754	1	24	Metabolism of proteins	Post-translational protein modification|Deubiquitination|Ub-specific processing proteases	Organismal Systems	Immune system	IL-17 signaling pathway	NA
51364	ZMYND10	0	Eukaryotes	3.38983	12	NA	9	16838	0	0	0	NA	NA	NA	NA	NA	NA
51428	DDX41	0	Eukaryotes	35.0877	43	44	34	7177	0.1551	3	3	Immune System	Innate Immune System|Cytosolic sensors of pathogen-associated DNA |STING mediated induction of host immune responses|Regulation of innate immune responses to cytosolic DNA|IRF3-mediated induction of type I IFN	NA	NA	NA	NA
51582	AZIN1	0	Last Universal Common Ancestor	15.9763	43	43	16	1880	0.1167	1	34	Metabolism	Metabolism of amino acids and derivatives|Metabolism of polyamines|Regulation of ornithine decarboxylase (ODC)	NA	NA	NA	NA
54480	CHPF2	0	Metazoans	0	43	39	5	149	0	0	8	Metabolism	Metabolism of carbohydrates|Glycosaminoglycan metabolism|Chondroitin sulfate/dermatan sulfate metabolism|Chondroitin sulfate biosynthesis	Metabolism	Global and overview maps|Glycan biosynthesis and metabolism	Metabolic pathways|Glycosaminoglycan biosynthesis - chondroitin sulfate / dermatan sulfate	NA
54510	PCDH18	0	Last Universal Common Ancestor	0	38	43	1	0	0	0	0	NA	NA	NA	NA	NA	NA
54892	NCAPG2	0	Eukaryotes	32.1637	41	44	18	542	0.2353	7	59	Cell Cycle	Cell Cycle, Mitotic|M Phase|Mitotic Prophase|Condensation of Prophase Chromosomes	NA	NA	NA	NA
55055	ZWILCH	0	Opisthokonts	10.2857	41	NA	11	228	0.1091	11	26	Cell Cycle|Signal Transduction	Cell Cycle, Mitotic|Cell Cycle Checkpoints|M Phase|Mitotic Spindle Checkpoint|Amplification of signal from the kinetochores|Mitotic Metaphase and Anaphase|Mitotic Prometaphase|Amplification of signal from unattached kinetochores via a MAD2 inhibitory signal|Resolution of Sister Chromatid Cohesion|Mitotic Anaphase|Separation of Sister Chromatids|Signaling by Rho GTPases|RHO GTPase Effectors|RHO GT…	NA	NA	NA	NA
55287	TMEM40	0	Mammals	0	11	10	1	0	0	0	10	NA	NA	NA	NA	NA	NA
55602	CDKN2AIP	0	Metazoans	4.57143	43	44	52	7401	0.1048	0	31	NA	NA	NA	NA	NA	NA
55709	KBTBD4	0	Last Universal Common Ancestor	1.12994	43	37	19	1824	0.1579	0	1	NA	NA	NA	NA	NA	NA
55729	ATF7IP	0	Last Universal Common Ancestor	1.12994	43	40	86	59933	0.0339	4	103	Chromatin organization	Chromatin modifying enzymes|PKMTs methylate histone lysines	NA	NA	NA	NA
56130	PCDHB6	13	Last Universal Common Ancestor	0	12	NA	1	0	0	0	1	NA	NA	NA	NA	NA	NA
56253	CRTAM	0	Vertebrates	16.9492	9	NA	1	0	0	1	2	Immune System	Adaptive Immune System|Immunoregulatory interactions between a Lymphoid and a non-Lymphoid cell	NA	NA	NA	NA
56776	FMN2	0	Eukaryotes	2.25989	15	NA	12	513	0.0152	0	4	NA	NA	NA	NA	NA	NA
56979	PRDM9	0	Last Universal Common Ancestor	2.40964	2	NA	0	0	NA	0	0	Cell Cycle|Chromatin organization|Reproduction	Meiosis|Meiotic recombination|Chromatin modifying enzymes|PKMTs methylate histone lysines|Meiosis|Meiotic recombination	Metabolism	Amino acid metabolism	Lysine degradation	NA
56999	ADAMTS9	0	Eukaryotes	0	41	33	1	0	0	0	23	Disease|Extracellular matrix organization|Metabolism of proteins	Diseases of glycosylation|Diseases associated with O-glycosylation of proteins|Defective B3GALTL causes Peters-plus syndrome (PpS)|Degradation of the extracellular matrix|Post-translational protein modification|O-linked glycosylation|O-glycosylation of TSR domain-containing proteins	NA	NA	NA	NA
57018	CCNL1	0	Eukaryotes	9.14286	43	NA	10	515	0.2667	0	23	NA	NA	NA	NA	NA	NA
57563	KLHL8	0	Last Universal Common Ancestor	0	43	30	21	2790	0.1524	0	30	NA	NA	NA	NA	NA	NA
57573	ZNF471	0	Last Universal Common Ancestor	4.7619	41	42	7	152	0	1	13	Gene expression (Transcription)	RNA Polymerase II Transcription|Generic Transcription Pathway	NA	NA	NA	NA
57683	ZDBF2	0	Vertebrates	0	29	40	12	251	0.0758	0	14	NA	NA	NA	NA	NA	NA
57685	CACHD1	0	Eukaryotes	0	39	36	16	1514	0.0083	0	11	NA	NA	NA	NA	NA	NA
79791	FBXO31	0	Eukaryotes	2.7027	43	42	27	1821	0.0712	8	43	Immune System|Metabolism of proteins	Adaptive Immune System|Class I MHC mediated antigen processing & presentation|Antigen processing: Ubiquitination & Proteasome degradation|Post-translational protein modification|Neddylation	NA	NA	NA	NA
79983	POF1B	0	Vertebrates	5.08475	21	19	33	14426	0.0227	0	11	NA	NA	NA	NA	NA	NA
80314	EPC1	0	Eukaryotes	1.12994	43	NA	34	1206	0.4332	16	11	Chromatin organization|Gene expression (Transcription)	Chromatin modifying enzymes|HATs acetylate histones|RNA Polymerase II Transcription|Generic Transcription Pathway|Transcriptional Regulation by E2F6	NA	NA	NA	NA
80731	THSD7B	0	Eukaryotes	0	6	NA	1	0	0	0	0	NA	NA	NA	NA	NA	NA
83468	GLT8D2	0	Eukaryotes	0	39	40	13	2415	0.0128	0	1	NA	NA	NA	NA	NA	NA
84128	WDR75	0	Eukaryotes	36.6279	43	42	22	2272	0.0736	4	36	Metabolism of RNA	rRNA processing|rRNA processing in the nucleus and cytosol|rRNA modification in the nucleus and cytosol|Major pathway of rRNA processing in the nucleolus and cytosol	Genetic Information Processing	Translation	Ribosome biogenesis in eukaryotes	NA
84662	GLIS2	0	Last Universal Common Ancestor	0	35	NA	13	512	0.1026	6	33	NA	NA	NA	NA	NA	NA
84699	CREB3L3	0	Opisthokonts	1.28205	3	4	19	2187	0.076	0	1	Metabolism of proteins|Transport of small molecules	Unfolded Protein Response (UPR)|CREB3 factors activate genes|Plasma lipoprotein assembly, remodeling, and clearance|Plasma lipoprotein remodeling|Assembly of active LPL and LIPC lipase complexes	Environmental Information Processing|Human Diseases|Organismal Systems	Signal transduction|Cancers: Overview|Cancers: Specific types|Endocrine and metabolic diseases|Infectious diseases: Viral|Neurodegenerative diseases|Substance dependence|Aging|Circulatory system|Endocrine system|Excretory system|Nervous system	cGMP-PKG signaling pathway|cAMP signaling pathway|PI3K-Akt signaling pathway|AMPK signaling pathway|TNF signaling pathway|Viral carcinogenesis|Prostate cancer|Insulin resistance|Hepatitis B|Human papillomavirus infection|Huntington's disease|Cocaine addiction|Amphetamine addiction|Alcoholism|Longevity regulating pathway|Adrenergic signaling in cardiomyocytes|Insulin secretion|Estrogen signaling p…	NA
84808	PERM1	0	Vertebrates	NA	5	2	0	0	NA	0	0	Organelle biogenesis and maintenance	Mitochondrial biogenesis|Transcriptional activation of mitochondrial biogenesis	NA	NA	NA	NA
84962	AJUBA	0	Eukaryotes	9.41176	39	37	31	2452	0.1032	7	3	Cell Cycle|Cellular responses to external stimuli|Developmental Biology	Cell Cycle, Mitotic|Mitotic G2-G2/M phases|G2/M Transition|Regulation of PLK1 Activity at G2/M Transition|Cellular responses to stress|Cellular response to hypoxia|Regulation of Hypoxia-inducible Factor (HIF) by oxygen|Oxygen-dependent proline hydroxylation of Hypoxia-inducible Factor Alpha|Activation of HOX genes during differentiation|Activation of anterior HOX genes in hindbrain development du…	Environmental Information Processing	Signal transduction	Hippo signaling pathway|Hippo signaling pathway - multiple species	NA
84964	ALKBH6	0	Eukaryotes	2.89855	42	NA	0	0	NA	0	2	NA	NA	NA	NA	NA	NA
85236	HIST1H2BK	27	Eukaryotes	13.6691	43	44	15	414	0.1238	115	52	Cell Cycle|Cellular responses to external stimuli|Chromatin organization|Developmental Biology|DNA Repair|Gene expression (Transcription)|Metabolism of proteins|Reproduction|Signal Transduction	Meiosis|Cell Cycle, Mitotic|Cell Cycle Checkpoints|Chromosome Maintenance|Meiotic synapsis|Telomere Maintenance|M Phase|G2/M Checkpoints|Nucleosome assembly|Meiotic recombination|Packaging Of Telomere Ends|Deposition of new CENPA-containing nucleosomes at the centromere|Mitotic Prophase|G2/M DNA damage checkpoint|Condensation of Prophase Chromosomes|Cellular responses to stress|Cellular Senescenc…	Human Diseases	Cancers: Overview|Immune diseases|Substance dependence	Viral carcinogenesis|Systemic lupus erythematosus|Alcoholism	NA
90167	FRMD7	0	Eukaryotes	1.12994	3	NA	0	0	NA	0	1	NA	NA	NA	NA	NA	NA
91523	PCED1B	0	Metazoans	2.02703	41	31	4	136	0	1	1	NA	NA	NA	NA	NA	NA
92856	IMP4	0	Last Universal Common Ancestor	50.289	42	NA	23	1550	0.2451	5	87	Metabolism of RNA	rRNA processing|rRNA processing in the nucleus and cytosol|rRNA modification in the nucleus and cytosol|Major pathway of rRNA processing in the nucleolus and cytosol	Genetic Information Processing	Translation	Ribosome biogenesis in eukaryotes	NA
114784	CSMD2	0	Last Universal Common Ancestor	0	2	NA	5	1	0.9	0	9	NA	NA	NA	NA	NA	NA
116285	ACSM1	0	Last Universal Common Ancestor	0	13	NA	4	63	0.3333	0	1	Metabolism	Biological oxidations|Phase II - Conjugation of compounds|Amino Acid conjugation|Conjugation of carboxylic acids|Conjugation of benzoate with glycine|Conjugation of phenylacetate with glutamine	Metabolism	Carbohydrate metabolism|Global and overview maps	Butanoate metabolism|Metabolic pathways	ChREBP regulation by carbohydrates and cAMP
123876	ACSM2A	1	Last Universal Common Ancestor	1.44928	2	2	0	0	NA	0	29	Metabolism	Biological oxidations|Phase II - Conjugation of compounds|Amino Acid conjugation|Conjugation of carboxylic acids|Conjugation of salicylate with glycine	Metabolism	Carbohydrate metabolism|Global and overview maps	Butanoate metabolism|Metabolic pathways	NA
132243	H1FOO	1	Metazoans	0	1	3	0	0	NA	0	0	NA	NA	NA	NA	NA	NA
132671	SPATA18	0	Metazoans	0	34	14	3	9	0.3333	0	12	NA	NA	NA	NA	NA	NA
145264	SERPINA12	0	Last Universal Common Ancestor	12.5	1	NA	38	13383	0.0014	0	1	NA	NA	NA	NA	NA	NA
146852	ODF4	0	Mammals	0	1	NA	5	1015	0	0	30	NA	NA	NA	NA	NA	NA
148823	GCSAML	0	Mammals	2.25989	9	39	0	0	NA	0	2	NA	NA	NA	NA	NA	NA
151742	PPM1L	0	Last Universal Common Ancestor	1.69492	41	27	4	39	0	3	86	Metabolism	Metabolism of lipids|Sphingolipid metabolism|Sphingolipid de novo biosynthesis	NA	NA	NA	NA
152007	GLIPR2	0	Last Universal Common Ancestor	1.69492	43	42	7	301	0.0476	0	2	NA	NA	NA	NA	NA	NA
152687	ZNF595	1	-	6.62252	37	NA	2	8	0	0	0	NA	NA	NA	NA	NA	NA
160335	TMTC2	0	Eukaryotes	0	39	39	2	137	0	0	18	NA	NA	NA	NA	NA	NA
160762	CCDC63	0	Eukaryotes	1.12994	1	NA	0	0	NA	0	0	NA	NA	NA	NA	NA	NA
170261	ZCCHC12	1	Metazoans	0	13	8	10	780	0.1556	0	1	NA	NA	NA	NA	NA	NA
201625	DNAH12	0	Eukaryotes	0	2	2	0	0	NA	0	0	NA	NA	Human Diseases	Neurodegenerative diseases	Huntington's disease	NA
219285	SAMD9L	0	Metazoans	1.44928	42	44	2	21	0	0	35	NA	NA	NA	NA	NA	NA
221002	RASGEF1A	0	Last Universal Common Ancestor	2.51572	24	30	1	0	0	0	24	Signal Transduction	MAPK family signaling cascades|MAPK1/MAPK3 signaling|RAF/MAP kinase cascade	NA	NA	NA	NA
222256	CDHR3	0	Last Universal Common Ancestor	0.564972	22	2	0	0	NA	0	1	NA	NA	NA	NA	NA	NA
253260	RICTOR	0	Eukaryotes	21.5569	43	40	83	24240	0.0893	6	52	Disease|Gene expression (Transcription)|Immune System|Signal Transduction	Diseases of signal transduction|PI3K/AKT Signaling in Cancer|Constitutive Signaling by AKT1 E17K in Cancer|RNA Polymerase II Transcription|Generic Transcription Pathway|Transcriptional Regulation by TP53|Regulation of TP53 Activity|Regulation of TP53 Expression and Degradation|Regulation of TP53 Degradation|Adaptive Immune System|Costimulation by the CD28 family|CD28 co-stimulation|CD28 dependent…	Environmental Information Processing	Signal transduction	mTOR signaling pathway	NA
255394	TCP11L2	0	Eukaryotes	2.25989	42	44	10	485	0.2222	0	2	NA	NA	NA	NA	NA	NA
256281	NUDT14	0	Last Universal Common Ancestor	1.44928	43	42	10	285	0.1111	0	0	Metabolism of proteins	Post-translational protein modification|Asparagine N-linked glycosylation|Biosynthesis of the N-glycan precursor (dolichol lipid-linked oligosaccharide, LLO) and transfer to a nascent protein|Synthesis of substrates in N-glycan biosythesis|Synthesis of dolichyl-phosphate-glucose	NA	NA	NA	NA
284521	OR2L13	6	Vertebrates	0	1	NA	1	0	0	1	0	Signal Transduction	Signaling by GPCR|GPCR downstream signalling|G alpha (s) signalling events|Olfactory Signaling Pathway	Organismal Systems	Sensory system	Olfactory transduction	NA
285172	FAM126B	0	Eukaryotes	2.89855	42	35	5	129	0.3	0	139	NA	NA	NA	NA	NA	NA
286464	CFAP47	0	Eukaryotes	0	2	NA	2	5	0	0	0	NA	NA	NA	NA	NA	NA
339479	BRINP3	0	Metazoans	8.47458	11	30	18	2768	0.0392	0	0	NA	NA	NA	NA	NA	NA
342926	ZNF677	0	Last Universal Common Ancestor	0	31	43	2	2	0	1	28	Gene expression (Transcription)	RNA Polymerase II Transcription|Generic Transcription Pathway	NA	NA	NA	NA
349136	WDR86	0	Metazoans	0	19	NA	13	1723	0.6026	0	1	NA	NA	NA	NA	NA	NA
187	APLNR	0	Vertebrates	0	36	32	95	51519	0.0063	3	2	Signal Transduction	Signaling by GPCR|GPCR downstream signalling|GPCR ligand binding|Class A/1 (Rhodopsin-like receptors)|G alpha (i) signalling events|Peptide ligand-binding receptors	Environmental Information Processing	Signaling molecules and interaction|Signal transduction	Neuroactive ligand-receptor interaction|Apelin signaling pathway	NA
373	TRIM23	0	Eukaryotes	0.564972	43	44	146	70579	0.0306	1	20	NA	NA	NA	NA	NA	NA
374	AREG	0	Vertebrates	0	13	4	14	18384	0.044	5	3	Metabolism of proteins|Vesicle-mediated transport	Post-translational protein modification|Asparagine N-linked glycosylation|Transport to the Golgi and subsequent modification|ER to Golgi Anterograde Transport|COPII (Coat Protein 2) Mediated Vesicle Transport|Cargo concentration in the ER|Membrane Trafficking|ER to Golgi Anterograde Transport|COPII (Coat Protein 2) Mediated Vesicle Transport|Cargo concentration in the ER	Environmental Information Processing	Signal transduction	ErbB signaling pathway|Hippo signaling pathway	NA
388	RHOB	2	Last Universal Common Ancestor	4.79042	43	NA	37	7954	0.0465	12	90	Developmental Biology|Hemostasis|Signal Transduction	Axon guidance|Semaphorin interactions|Sema4D in semaphorin signaling|Sema4D induced cell migration and growth-cone collapse|Platelet activation, signaling and aggregation|GPVI-mediated activation cascade|Signaling by Rho GTPases|Signaling by GPCR|Rho GTPase cycle|RHO GTPase Effectors|GPCR downstream signalling|G alpha (12/13) signalling events|RHO GTPases activate PKNs|RHO GTPases activate CIT|RH…	NA	NA	NA	NA
414	ARSD	1	Last Universal Common Ancestor	0	42	42	0	0	NA	0	25	Metabolism|Metabolism of proteins	Metabolism of lipids|Sphingolipid metabolism|Glycosphingolipid metabolism|Post-translational protein modification|Gamma carboxylation, hypusine formation and arylsulfatase activation|The activation of arylsulfatases	NA	NA	NA	NA
488	ATP2A2	2	Last Universal Common Ancestor	97.0588	43	30	87	30513	0.0652	4	55	Hemostasis|Muscle contraction|Signal Transduction|Transport of small molecules	Platelet homeostasis|Platelet calcium homeostasis|Reduction of cytosolic Ca++ levels|Cardiac conduction|Ion homeostasis|Signaling by NOTCH|Pre-NOTCH Expression and Processing|Pre-NOTCH Processing in Golgi|Ion channel transport|Ion transport by P-type ATPases	Environmental Information Processing|Human Diseases|Organismal Systems	Signal transduction|Cardiovascular diseases|Neurodegenerative diseases|Circulatory system|Digestive system|Endocrine system	Calcium signaling pathway|cGMP-PKG signaling pathway|cAMP signaling pathway|Hypertrophic cardiomyopathy (HCM)|Arrhythmogenic right ventricular cardiomyopathy (ARVC)|Dilated cardiomyopathy (DCM)|Alzheimer's disease|Cardiac muscle contraction|Adrenergic signaling in cardiomyocytes|Pancreatic secretion|Thyroid hormone signaling pathway	NA
506	ATP5F1B	1	Last Universal Common Ancestor	35.8382	43	44	176	167330	0.0799	6	20	Metabolism|Metabolism of proteins|Organelle biogenesis and maintenance	The citric acid (TCA) cycle and respiratory electron transport|Respiratory electron transport, ATP synthesis by chemiosmotic coupling, and heat production by uncoupling proteins.|Formation of ATP by chemiosmotic coupling|Mitochondrial protein import|Mitochondrial biogenesis|Transcriptional activation of mitochondrial biogenesis|Cristae formation	Human Diseases|Metabolism	Neurodegenerative diseases|Energy metabolism|Global and overview maps	Alzheimer's disease|Parkinson's disease|Huntington's disease|Oxidative phosphorylation|Metabolic pathways	NA
526	ATP6V1B2	2	Last Universal Common Ancestor	41.6185	43	39	100	18763	0.0903	1	37	Immune System|Signal Transduction|Transport of small molecules	Innate Immune System|ROS, RNS production in phagocytes|Signaling by Receptor Tyrosine Kinases|Signaling by Insulin receptor|Insulin receptor recycling|Iron uptake and transport|Ion channel transport|Transferrin endocytosis and recycling	Cellular Processes|Environmental Information Processing|Human Diseases|Metabolism|Organismal Systems	Transport and catabolism|Signal transduction|Immune diseases|Infectious diseases: Bacterial|Energy metabolism|Global and overview maps|Excretory system|Nervous system	Phagosome|mTOR signaling pathway|Rheumatoid arthritis|Vibrio cholerae infection|Epithelial cell signaling in Helicobacter pylori infection|Oxidative phosphorylation|Metabolic pathways|Collecting duct acid secretion|Synaptic vesicle cycle	NA
577	ADGRB3	0	Metazoans	0	19	NA	4	95	0	0	1	NA	NA	NA	NA	NA	NA
800	CALD1	0	Vertebrates	1.69492	42	22	41	3328	0.1573	4	5	Muscle contraction	Smooth Muscle Contraction	Organismal Systems	Circulatory system	Vascular smooth muscle contraction	NA
910	CD1B	0	Vertebrates	0	5	37	52	10246	0.009	5	0	Immune System	Adaptive Immune System|Immunoregulatory interactions between a Lymphoid and a non-Lymphoid cell	Cellular Processes|Organismal Systems	Cellular community - eukaryotes|Immune system	Tight junction|Hematopoietic cell lineage	NA
1030	CDKN2B	0	Last Universal Common Ancestor	1.44928	33	19	18	1492	0.0392	2	16	Cell Cycle|Cellular responses to external stimuli|Gene expression (Transcription)|Signal Transduction	Cell Cycle, Mitotic|Mitotic G1-G1/S phases|G1 Phase|Cyclin D associated events in G1|Cellular responses to stress|Cellular Senescence|Oxidative Stress Induced Senescence|Senescence-Associated Secretory Phenotype (SASP)|Oncogene Induced Senescence|RNA Polymerase II Transcription|Generic Transcription Pathway|Transcriptional activity of SMAD2/SMAD3:SMAD4 heterotrimer|SMAD2/SMAD3:SMAD4 heterotrimer …	Cellular Processes|Environmental Information Processing|Human Diseases	Cell growth and death|Signal transduction|Cancers: Overview|Cancers: Specific types|Infectious diseases: Viral	Cell cycle|Cellular senescence|FoxO signaling pathway|TGF-beta signaling pathway|Pathways in cancer|Viral carcinogenesis|Small cell lung cancer|Gastric cancer|HTLV-I infection	Cell Cycle: G1/S Check Point |Cyclins and Cell Cycle Regulation
1046	CDX4	0	Metazoans	0	0	NA	8	83	0.1071	0	1	NA	NA	NA	NA	NA	NA
1293	COL6A3	0	Eukaryotes	0	40	7	4	66	0.1667	25	1	Developmental Biology|Extracellular matrix organization|Signal Transduction	Axon guidance|NCAM signaling for neurite out-growth|NCAM1 interactions|Degradation of the extracellular matrix|Collagen formation|Integrin cell surface interactions|ECM proteoglycans|Collagen degradation|Collagen biosynthesis and modifying enzymes|Assembly of collagen fibrils and other multimeric structures|Collagen chain trimerization|Signaling by Receptor Tyrosine Kinases|Signaling by PDGF	Cellular Processes|Environmental Information Processing|Human Diseases|Organismal Systems	Cellular community - eukaryotes|Signaling molecules and interaction|Signal transduction|Infectious diseases: Viral|Digestive system	Focal adhesion|ECM-receptor interaction|PI3K-Akt signaling pathway|Human papillomavirus infection|Protein digestion and absorption	NA
1464	CSPG4	1	Metazoans	4.57143	36	44	17	1522	0.0515	1	1	Disease|Metabolism	Diseases of glycosylation|Diseases associated with glycosaminoglycan metabolism|Defective B4GALT7 causes EDS, progeroid type|Defective B3GAT3 causes JDSSDHD|Defective CHST3 causes SEDCJD|Defective CHST14 causes EDS, musculocontractural type|Defective CHSY1 causes TPBS|Defective B3GALT6 causes EDSP2 and SEMDJL1|Metabolism of carbohydrates|Glycosaminoglycan metabolism|Heparan sulfate/heparin (HS-GA…	NA	NA	NA	NA
1610	DAO	0	Last Universal Common Ancestor	0	3	3	7	17188	0	1	21	Metabolism	Metabolism of amino acids and derivatives|Glyoxylate metabolism and glycine degradation	Cellular Processes|Metabolism	Transport and catabolism|Amino acid metabolism|Global and overview maps|Metabolism of other amino acids	Peroxisome|Glycine, serine and threonine metabolism|Arginine and proline metabolism|Metabolic pathways|D-Arginine and D-ornithine metabolism	NA
1660	DHX9	1	Last Universal Common Ancestor	43.1034	43	44	245	58655	0.153	22	7	Immune System|Metabolism of RNA	Cytokine Signaling in Immune system|Innate Immune System|Toll-Like Receptors Cascades|DDX58/IFIH1-mediated induction of interferon-alpha/beta|Cytosolic sensors of pathogen-associated DNA |Signaling by Interleukins|ZBP1(DAI) mediated induction of type I IFNs|Toll Like Receptor 4 (TLR4) Cascade|Toll Like Receptor 9 (TLR9) Cascade|Toll Like Receptor 10 (TLR10) Cascade|Toll Like Receptor 3 (TLR3) Cas…	NA	NA	NA	NA
1823	DSC1	0	Metazoans	0	3	4	29	977	0.1872	5	7	Developmental Biology|Immune System	Keratinization|Formation of the cornified envelope|Innate Immune System|Neutrophil degranulation	NA	NA	NA	NA
1825	DSC3	0	Last Universal Common Ancestor	0	13	6	12	568	0.1818	5	18	Developmental Biology	Keratinization|Formation of the cornified envelope	NA	NA	NA	NA
1828	DSG1	0	Last Universal Common Ancestor	0	4	23	43	4533	0.1351	5	1	Developmental Biology|Immune System|Programmed Cell Death	Keratinization|Formation of the cornified envelope|Innate Immune System|Neutrophil degranulation|Apoptosis|Apoptotic execution phase|Apoptotic cleavage of cellular proteins|Apoptotic cleavage of cell adhesion proteins	Human Diseases	Infectious diseases: Bacterial	Staphylococcus aureus infection	NA
1833	EPYC	0	Last Universal Common Ancestor	0	2	5	2	1	0	0	0	NA	NA	NA	NA	NA	Small Leucine-rich Proteoglycan (SLRP) molecules
1849	DUSP7	0	Last Universal Common Ancestor	18.75	43	NA	15	881	0.1238	0	54	Immune System|Signal Transduction	Cytokine Signaling in Immune system|Innate Immune System|Toll-Like Receptors Cascades|Signaling by Interleukins|Toll Like Receptor 4 (TLR4) Cascade|Toll Like Receptor 9 (TLR9) Cascade|Toll Like Receptor 10 (TLR10) Cascade|Toll Like Receptor 3 (TLR3) Cascade|Toll Like Receptor 5 (TLR5) Cascade|Toll Like Receptor 7/8 (TLR7/8) Cascade|Toll Like Receptor 2 (TLR2) Cascade|Interleukin-17 signaling|MyD8…	Environmental Information Processing	Signal transduction	MAPK signaling pathway	NA
1915	EEF1A1	30	Last Universal Common Ancestor	23.2143	43	43	394	306604	0.082	7	67	Cellular responses to external stimuli|Immune System|Metabolism of proteins	Cellular responses to stress|Cellular response to heat stress|HSF1 activation|Innate Immune System|Neutrophil degranulation|Post-translational protein modification|Translation|Eukaryotic Translation Elongation|Protein methylation|Peptide chain elongation	Genetic Information Processing|Human Diseases	Translation|Infectious diseases: Bacterial	RNA transport|Legionellosis	West Nile Virus
1938	EEF2	0	Last Universal Common Ancestor	93.75	43	44	194	53557	0.1445	3	77	Disease|Immune System|Metabolism of proteins	Infectious disease|Uptake and actions of bacterial toxins|Uptake and function of diphtheria toxin|Innate Immune System|Neutrophil degranulation|Post-translational protein modification|Translation|Eukaryotic Translation Elongation|Gamma carboxylation, hypusine formation and arylsulfatase activation|Protein methylation|Peptide chain elongation|Synthesis of diphthamide-EEF2	Environmental Information Processing|Organismal Systems	Signal transduction|Endocrine system	AMPK signaling pathway|Oxytocin signaling pathway	Eukaryotic protein translation
1951	CELSR3	0	Last Universal Common Ancestor	0	6	3	27	6040	0.0427	0	64	NA	NA	NA	NA	NA	NA
1969	EPHA2	0	Last Universal Common Ancestor	0	41	NA	94	63180	0.0586	5	56	Developmental Biology	Axon guidance|EPH-Ephrin signaling|EPHA-mediated growth cone collapse|EPH-ephrin mediated repulsion of cells	Environmental Information Processing|Organismal Systems	Signal transduction|Development	MAPK signaling pathway|Ras signaling pathway|Rap1 signaling pathway|PI3K-Akt signaling pathway|Axon guidance	NA
1990	CELA1	0	Last Universal Common Ancestor	5.42169	1	NA	22	2175	0.013	0	0	NA	NA	NA	NA	NA	Proepithelin Conversion to Epithelin and Wound Repair Control
1995	ELAVL3	2	Last Universal Common Ancestor	0	2	4	11	504	0.3091	0	47	NA	NA	NA	NA	NA	NA
2041	EPHA1	0	Last Universal Common Ancestor	0	35	43	80	20412	0.0212	5	12	Developmental Biology	Axon guidance|Transcriptional regulation of pluripotent stem cells|EPH-Ephrin signaling|POU5F1 (OCT4), SOX2, NANOG activate genes related to proliferation|EPHA-mediated growth cone collapse|EPH-ephrin mediated repulsion of cells	Organismal Systems	Development	Axon guidance	NA
2058	EPRS	0	Last Universal Common Ancestor	23.2877	43	35	130	27446	0.1339	7	9	Metabolism|Metabolism of proteins|Metabolism of RNA	Metabolism of amino acids and derivatives|Selenoamino acid metabolism|SeMet incorporation into proteins|Translation|tRNA Aminoacylation|Cytosolic tRNA aminoacylation|tRNA processing|tRNA modification in the nucleus and cytosol	Genetic Information Processing|Metabolism	Translation|Global and overview maps|Metabolism of cofactors and vitamins	Aminoacyl-tRNA biosynthesis|Metabolic pathways|Porphyrin and chlorophyll metabolism	NA
2185	PTK2B	0	Eukaryotes	0	43	35	88	24583	0.1371	10	11	Cell-Cell communication|Immune System|Signal Transduction	Signal regulatory protein family interactions|Cytokine Signaling in Immune system|Signaling by Interleukins|Interleukin-2 family signaling|Interleukin-2 signaling|Signaling by Receptor Tyrosine Kinases|Signaling by VEGF|VEGFA-VEGFR2 Pathway	Environmental Information Processing|Human Diseases|Organismal Systems	Signal transduction|Infectious diseases: Viral|Endocrine system|Immune system	Calcium signaling pathway|Phospholipase D signaling pathway|Hepatitis B|GnRH signaling pathway|Chemokine signaling pathway|Natural killer cell mediated cytotoxicity|Leukocyte transendothelial migration	Pertussis toxin-insensitive CCR5 Signaling in Macrophage|Links between Pyk2 and Map Kinases|Signaling of Hepatocyte Growth Factor Receptor|Ras-Independent pathway in NK cell-mediated cytotoxicity|CXCR4 Signaling Pathway|IL-7 Signal Transduction|Thrombin signaling and protease-activated receptors|Role of nicotinic acetylcholine receptors in the regulation of apoptosis|Angiotensin II mediated activ…
2201	FBN2	0	Eukaryotes	0	12	1	22	6254	0.0693	3	17	Extracellular matrix organization	Degradation of the extracellular matrix|Elastic fibre formation|Molecules associated with elastic fibres	NA	NA	NA	NA
2205	FCER1A	0	Mammals	2.7027	30	29	5	50	0.2	2	0	Immune System	Innate Immune System|Fc epsilon receptor (FCERI) signaling|Role of LAT2/NTAL/LAB on calcium mobilization|FCERI mediated MAPK activation|FCERI mediated Ca+2 mobilization|FCERI mediated NF-kB activation	Environmental Information Processing|Human Diseases|Organismal Systems	Signal transduction|Immune diseases|Immune system	Sphingolipid signaling pathway|Phospholipase D signaling pathway|Asthma|Fc epsilon RI signaling pathway	Fc Epsilon Receptor I Signaling in Mast Cells
2247	FGF2	0	Metazoans	0.591716	36	18	39	17413	0.0837	100	102	Developmental Biology|Disease|Extracellular matrix organization|Immune System|Signal Transduction	Transcriptional regulation of pluripotent stem cells|POU5F1 (OCT4), SOX2, NANOG activate genes related to proliferation|Diseases of signal transduction|Signaling by FGFR in disease|PI3K/AKT Signaling in Cancer|Constitutive Signaling by Aberrant PI3K in Cancer|Signaling by FGFR2 in disease|Signaling by FGFR1 in disease|Signaling by FGFR3 in disease|FGFR1 mutant receptor activation|FGFR2 mutant rec…	Cellular Processes|Environmental Information Processing|Human Diseases	Cell motility|Cellular community - eukaryotes|Signal transduction|Cancers: Overview|Cancers: Specific types|Drug resistance: Antineoplastic|Infectious diseases: Viral	Regulation of actin cytoskeleton|Signaling pathways regulating pluripotency of stem cells|MAPK signaling pathway|Ras signaling pathway|Rap1 signaling pathway|PI3K-Akt signaling pathway|Pathways in cancer|Proteoglycans in cancer|Melanoma|Breast cancer|Gastric cancer|EGFR tyrosine kinase inhibitor resistance|Kaposi's sarcoma-associated herpesvirus infection	NFAT and Hypertrophy of the heart (Transcription in the broken heart)
2304	FOXE1	0	Eukaryotes	1.44928	3	NA	78	9617	0.0213	0	27	NA	NA	NA	NA	NA	NA
2312	FLG	4	Last Universal Common Ancestor	0	3	6	24	4671	0.0362	2	1	Developmental Biology	Keratinization|Formation of the cornified envelope	NA	NA	NA	NA
2534	FYN	1	Last Universal Common Ancestor	15.5405	43	17	375	445811	0.034	73	14	Cell-Cell communication|Developmental Biology|Disease|Hemostasis|Immune System|Signal Transduction	Nephrin family interactions|Axon guidance|EPH-Ephrin signaling|Netrin-1 signaling|Semaphorin interactions|NCAM signaling for neurite out-growth|Reelin signalling pathway|EPHB-mediated forward signaling|EPHA-mediated growth cone collapse|Ephrin signaling|EPH-ephrin mediated repulsion of cells|Sema3A PAK dependent Axon repulsion|SEMA3A-Plexin repulsion signaling by inhibiting Integrin adhesion|CRMP…	Cellular Processes|Environmental Information Processing|Human Diseases|Organismal Systems	Cellular community - eukaryotes|Signal transduction|Cardiovascular diseases|Infectious diseases: Bacterial|Infectious diseases: Viral|Neurodegenerative diseases|Development|Immune system|Nervous system	Focal adhesion|Adherens junction|Sphingolipid signaling pathway|Phospholipase D signaling pathway|Viral myocarditis|Pathogenic Escherichia coli infection|Measles|Prion diseases|Axon guidance|Osteoclast differentiation|Platelet activation|Natural killer cell mediated cytotoxicity|T cell receptor signaling pathway|Fc epsilon RI signaling pathway|Cholinergic synapse	Bioactive Peptide Induced Signaling Pathway|Integrin Signaling Pathway|Eph Kinases and ephrins support platelet aggregation|TSP-1 Induced Apoptosis in Microvascular Endothelial Cell |IL-7 Signal Transduction|T Cell Receptor Signaling Pathway|Lck and Fyn tyrosine kinases in initiation of TCR Activation|Erk and PI-3 Kinase Are Necessary for Collagen Binding in Corneal Epithelia|Reelin Signaling Pat…
2765	GML	0	Mammals	1.12994	1	NA	24	1492	0.0109	2	0	NA	NA	NA	NA	NA	NA
2769	GNA15	0	Eukaryotes	0	34	29	28	15773	0.0582	15	0	Hemostasis|Metabolism|Signal Transduction	Platelet activation, signaling and aggregation|Signal amplification|Thrombin signalling through proteinase activated receptors (PARs)|ADP signalling through P2Y purinoceptor 1|Thromboxane signalling through TP receptor|Integration of energy metabolism|Regulation of insulin secretion|Acetylcholine regulates insulin secretion|Free fatty acids regulate insulin secretion|Fatty Acids bound to GPR40 (F…	Environmental Information Processing|Human Diseases|Organismal Systems	Signal transduction|Infectious diseases: Parasitic|Endocrine system	Calcium signaling pathway|Chagas disease (American trypanosomiasis)|Amoebiasis|Relaxin signaling pathway	fMLP induced chemokine gene expression in HMC-1 cells
2805	GOT1	0	Last Universal Common Ancestor	5.40541	43	30	57	10263	0.0752	0	27	Metabolism	Metabolism of amino acids and derivatives|Metabolism of carbohydrates|Sulfur amino acid metabolism|Metabolism of polyamines|Glucose metabolism|Amino acid synthesis and interconversion (transamination)|Methionine salvage pathway|Gluconeogenesis	Metabolism	Amino acid metabolism|Global and overview maps	Arginine biosynthesis|Alanine, aspartate and glutamate metabolism|Cysteine and methionine metabolism|Arginine and proline metabolism|Tyrosine metabolism|Phenylalanine metabolism|Phenylalanine, tyrosine and tryptophan biosynthesis|Metabolic pathways|Carbon metabolism|2-Oxocarboxylic acid metabolism|Biosynthesis of amino acids	Malate-aspartate shuttle
2847	MCHR1	0	Metazoans	0	5	NA	2	111	0	7	0	Organelle biogenesis and maintenance|Signal Transduction	Cilium Assembly|Cargo trafficking to the periciliary membrane|BBSome-mediated cargo-targeting to cilium|Signaling by GPCR|GPCR downstream signalling|GPCR ligand binding|Class A/1 (Rhodopsin-like receptors)|G alpha (q) signalling events|G alpha (i) signalling events|Peptide ligand-binding receptors	Environmental Information Processing	Signaling molecules and interaction	Neuroactive ligand-receptor interaction	NA
2854	GPR32	1	Mammals	1.71429	2	NA	0	0	NA	2	0	Signal Transduction	Signaling by GPCR|GPCR downstream signalling|G alpha (s) signalling events	NA	NA	NA	NA
2874	GPS2	1	Metazoans	4	43	44	62	15035	0.0904	11	0	Chromatin organization	Chromatin modifying enzymes|HDACs deacetylate histones	Human Diseases	Infectious diseases: Viral	HTLV-I infection	NA
2880	GPX5	0	Last Universal Common Ancestor	0	1	NA	0	0	NA	0	0	Cellular responses to external stimuli	Cellular responses to stress|Detoxification of Reactive Oxygen Species	Metabolism|Organismal Systems	Lipid metabolism|Metabolism of other amino acids|Endocrine system	Arachidonic acid metabolism|Glutathione metabolism|Thyroid hormone synthesis	NA
2885	GRB2	0	Eukaryotes	19.5402	43	43	763	1836426	0.0253	38	96	Cell-Cell communication|Developmental Biology|Disease|Hemostasis|Immune System|Signal Transduction|Vesicle-mediated transport	Signal regulatory protein family interactions|Axon guidance|NCAM signaling for neurite out-growth|RET signaling|Diseases of signal transduction|Infectious disease|Signaling by FGFR in disease|Signaling by EGFR in Cancer|PI3K/AKT Signaling in Cancer|Listeria monocytogenes entry into host cells|Constitutive Signaling by Aberrant PI3K in Cancer|Signaling by EGFRvIII in Cancer|Signaling by Ligand-Res…	Cellular Processes|Environmental Information Processing|Human Diseases|Organismal Systems	Cellular community - eukaryotes|Signal transduction|Cancers: Overview|Cancers: Specific types|Drug resistance: Antineoplastic|Infectious diseases: Viral|Substance dependence|Development|Endocrine system|Immune system|Nervous system	Focal adhesion|Gap junction|Signaling pathways regulating pluripotency of stem cells|MAPK signaling pathway|ErbB signaling pathway|Ras signaling pathway|FoxO signaling pathway|Phospholipase D signaling pathway|mTOR signaling pathway|PI3K-Akt signaling pathway|Jak-STAT signaling pathway|Pathways in cancer|Viral carcinogenesis|Proteoglycans in cancer|MicroRNAs in cancer|Choline metabolism in cancer…	EGF Signaling Pathway|EPO Signaling Pathway|Role of ERBB2 in Signal Transduction and Oncology|Transcription factor CREB and its extracellular signals|Growth Hormone Signaling Pathway|Calcium Signaling by HBx of Hepatitis B virus|IL 2 signaling pathway|Insulin Signaling Pathway|BCR Signaling Pathway|The Co-Stimulatory Signal During T-cell Activation|Inhibition of Cellular Proliferation by Gleevec|…
2909	ARHGAP35	0	Eukaryotes	1.12994	43	43	15	2245	0.0952	4	46	Developmental Biology|Signal Transduction	Axon guidance|Semaphorin interactions|Sema4D in semaphorin signaling|Sema4D mediated inhibition of cell attachment and migration|Signaling by Rho GTPases|Signaling by Non-Receptor Tyrosine Kinases|Rho GTPase cycle|Signaling by PTK6|PTK6 Regulates RHO GTPases, RAS GTPase and MAP kinases	Cellular Processes|Organismal Systems	Cell motility|Cellular community - eukaryotes|Immune system	Regulation of actin cytoskeleton|Focal adhesion|Platelet activation|Leukocyte transendothelial migration	NA
3066	HDAC2	1	Last Universal Common Ancestor	4.51977	43	44	335	212886	0.0662	86	6	Chromatin organization|Disease|Gene expression (Transcription)|Hemostasis|Metabolism of proteins|Signal Transduction	Chromatin modifying enzymes|HDACs deacetylate histones|Diseases of signal transduction|Signaling by NOTCH1 in Cancer|Signaling by NOTCH1 PEST Domain Mutants in Cancer|Signaling by NOTCH1 HD+PEST Domain Mutants in Cancer|Constitutive Signaling by NOTCH1 PEST Domain Mutants|Constitutive Signaling by NOTCH1 HD+PEST Domain Mutants|Epigenetic regulation of gene expression|RNA Polymerase II Transcripti…	Cellular Processes|Environmental Information Processing|Human Diseases|Organismal Systems	Cell growth and death|Signal transduction|Cancers: Overview|Cancers: Specific types|Infectious diseases: Viral|Neurodegenerative diseases|Substance dependence|Aging|Endocrine system	Cell cycle|Notch signaling pathway|Pathways in cancer|Transcriptional misregulation in cancer|Viral carcinogenesis|Chronic myeloid leukemia|Human papillomavirus infection|Epstein-Barr virus infection|Huntington's disease|Alcoholism|Longevity regulating pathway - multiple species|Thyroid hormone signaling pathway	The PRC2 Complex Sets Long-term Gene Silencing Through Modification of Histone Tails|Role of MEF2D in T-cell Apoptosis|CARM1 and Regulation of the Estrogen Receptor|METS affect on Macrophage Differentiation
3101	HK3	0	Last Universal Common Ancestor	0	24	4	20	5735	0.0368	0	0	Immune System|Metabolism	Innate Immune System|Neutrophil degranulation|Metabolism of carbohydrates|Glucose metabolism|Glycolysis	Environmental Information Processing|Human Diseases|Metabolism|Organismal Systems	Signal transduction|Cancers: Overview|Endocrine and metabolic diseases|Biosynthesis of other secondary metabolites|Carbohydrate metabolism|Global and overview maps|Digestive system|Endocrine system	HIF-1 signaling pathway|Central carbon metabolism in cancer|Type II diabetes mellitus|Neomycin, kanamycin and gentamicin biosynthesis|Glycolysis / Gluconeogenesis|Fructose and mannose metabolism|Galactose metabolism|Starch and sucrose metabolism|Amino sugar and nucleotide sugar metabolism|Metabolic pathways|Carbon metabolism|Carbohydrate digestion and absorption|Insulin signaling pathway	NA
3192	HNRNPU	0	Eukaryotes	87.5	43	44	521	301257	0.0921	24	115	Metabolism of RNA	Processing of Capped Intron-Containing Pre-mRNA|mRNA Splicing|mRNA Splicing - Major Pathway	Genetic Information Processing	Transcription	Spliceosome	NA
3308	HSPA4	0	Last Universal Common Ancestor	1.12994	43	40	335	277396	0.0626	11	45	Cellular responses to external stimuli	Cellular responses to stress|Cellular response to heat stress|Regulation of HSF1-mediated heat shock response	Cellular Processes|Organismal Systems	Cellular community - eukaryotes|Immune system	Tight junction|Antigen processing and presentation	NA
3394	IRF8	0	Metazoans	11.2994	40	7	22	3063	0.1429	1	2	Immune System	Cytokine Signaling in Immune system|Interferon Signaling|Interferon gamma signaling|Interferon alpha/beta signaling	Human Diseases	Infectious diseases: Bacterial	Pertussis	NA
[truncated: 1,670 more rows]

## Sheet: 711_known_tsgoncogene
entrez	symbol	cgc_annotation	vogelstein_annotation	NCG6_oncogene	NCG6_tsg
[truncated: 711 more rows]

## Sheet: 104_candidatemultiplescreens
entrez	symbol	screens_cancertypes	relevant_pubmed_ids
[truncated: 104 more rows]

[truncated: 1 more sheets: 711_candidatesamplesize]
